# Supplementary material for: Analysis of the crosstalk between EMT-related gene and Tumor-infiltrating immune cell in Esophageal Squamous Cell Carcinoma
Source: Research Square preprint supplement (doi:10.21203/rs.3.rs-2365658/v1), 2022-12-28
Supplement: Supplementary file 1 [file 4d89f2f48c31d1532d3a87b3.xlsx]

## Sheet: The transcriptome sequencing ma
ID	gene_name	CTRL_1	CTRL_2	CTRL_3	NQO_1	NQO_2	NQO_3	gene_chr	gene_start	gene_end	gene_strand	gene_length	gene_biotype	gene_description
ENSMUSG00000044041	Krt13	13071.2	21613.6	16556.7	21395.8	17454.8	13722.1	11	100117327	100121566	-	1821	protein_coding	keratin 13 [Source:MGI Symbol;Acc:MGI:101925]
ENSMUSG00000059668	Krt4	10284.1	16264.8	14471.7	9369.64	7127.87	5257	15	101918536	101924735	-	2132	protein_coding	keratin 4 [Source:MGI Symbol;Acc:MGI:96701]
ENSMUSG00000064351	mt-Co1	12315.6	10235.5	9990.22	7814.44	6331.12	9525.24	MT	5328	6872	+	1545	protein_coding	mitochondrially encoded cytochrome c oxidase I [Source:MGI Symbol;Acc:MGI:102504]
ENSMUSG00000031972	Acta1	10986.9	8356.76	9575.64	5787.19	5161.1	7107.37	8	123891769	123894751	-	1536	protein_coding	actin, alpha 1, skeletal muscle [Source:MGI Symbol;Acc:MGI:87902]
ENSMUSG00000064370	mt-Cytb	7811.21	6270	6097.53	4548.02	3903.44	5548.53	MT	14145	15288	+	1144	protein_coding	mitochondrially encoded cytochrome b [Source:MGI Symbol;Acc:MGI:102501]
ENSMUSG00000064341	mt-Nd1	6666.11	5463.49	5057.36	3985.68	3317.82	4376.75	MT	2751	3707	+	957	protein_coding	mitochondrially encoded NADH dehydrogenase 1 [Source:MGI Symbol;Acc:MGI:101787]
ENSMUSG00000074199	Krtdap	3823.92	5313.03	4335.43	2898.9	2388.17	2703.27	7	30787896	30791097	+	679	protein_coding	keratinocyte differentiation associated protein [Source:MGI Symbol;Acc:MGI:1928282]
ENSMUSG00000017002	Slpi	2756.82	4172.3	3530.65	2924.46	2067.34	2109.4	2	164354070	164389095	-	1180	protein_coding	secretory leukocyte peptidase inhibitor [Source:MGI Symbol;Acc:MGI:109297]
ENSMUSG00000064345	mt-Nd2	4093.43	3047.83	3109.36	1937.84	1556.39	2286.34	MT	3914	4951	+	1038	protein_coding	mitochondrially encoded NADH dehydrogenase 2 [Source:MGI Symbol;Acc:MGI:102500]
ENSMUSG00000045545	Krt14	223.61	346.047	259.22	2593.97	7746.02	4083.02	11	100203162	100207548	-	1758	protein_coding	keratin 14 [Source:MGI Symbol;Acc:MGI:96688]
ENSMUSG00000061723	Tnnt3	4028.85	2878.51	3210.53	1614.32	1147.72	1558.89	7	142498836	142516009	+	1583	protein_coding	troponin T3, skeletal, fast [Source:MGI Symbol;Acc:MGI:109550]
ENSMUSG00000064363	mt-Nd4	3520.34	2705.44	2600.42	1877.68	1451.54	2205.46	MT	10167	11544	+	1378	protein_coding	mitochondrially encoded NADH dehydrogenase 4 [Source:MGI Symbol;Acc:MGI:102498]
ENSMUSG00000043165	Lor	2412.15	3473.16	3216.77	1644.1	1361.43	1802.1	3	92080271	92083142	-	1779	protein_coding	loricrin [Source:MGI Symbol;Acc:MGI:96816]
ENSMUSG00000007892	Rplp1	1935.2	2355.68	1986.46	2146.6	2347.18	2242.93	9	61913284	61914542	-	499	protein_coding	ribosomal protein, large, P1 [Source:MGI Symbol;Acc:MGI:1927099]
ENSMUSG00000030672	Mylpf	3072.91	2446.59	2522.86	1189.03	1077.25	1346.06	7	127208890	127214298	+	1062	protein_coding	myosin light chain, phosphorylatable, fast skeletal muscle [Source:MGI Symbol;Acc:MGI:97273]
ENSMUSG00000031757	Mt4	1812.04	2480.29	2004.72	1987.15	2131.2	1158.77	8	94137197	94139031	+	398	protein_coding	metallothionein 4 [Source:MGI Symbol;Acc:MGI:99692]
ENSMUSG00000023041	Krt6b	4.91616	6.09369	5.68234	3295.19	4986.11	3220.01	15	101676034	101680289	-	2226	protein_coding	keratin 6B [Source:MGI Symbol;Acc:MGI:1333768]
ENSMUSG00000037742	Eef1a1	1614.44	1973.07	1808.58	2104.12	2106.29	1892.75	9	78478449	78489151	-	2493	protein_coding	eukaryotic translation elongation factor 1 alpha 1 [Source:MGI Symbol;Acc:MGI:1096881]
ENSMUSG00000018893	Mb	2958.22	2045.17	1996.96	1045.07	1041.5	1819.83	15	77015489	77050670	-	1252	protein_coding	myoglobin [Source:MGI Symbol;Acc:MGI:96922]
ENSMUSG00000056071	S100a9	76.2413	57.4614	79.7544	2423.87	4080.03	3901.79	3	90692632	90695721	-	522	protein_coding	S100 calcium binding protein A9 (calgranulin B) [Source:MGI Symbol;Acc:MGI:1338947]
ENSMUSG00000031097	Tnni2	2909.66	1985.99	2369.65	1163.9	819.088	1096.59	7	142441808	142444410	+	1497	protein_coding	troponin I, skeletal, fast 2 [Source:MGI Symbol;Acc:MGI:105070]
ENSMUSG00000033508	Asprv1	1832.87	2850.03	2402	1110.18	576.355	892.476	6	86628164	86629710	+	1547	protein_coding	aspartic peptidase, retroviral-like 1 [Source:MGI Symbol;Acc:MGI:1915105]
ENSMUSG00000053522	Lgals7	1365.89	1645.41	1601.24	1637.55	1671.42	1544.29	7	28863853	28866284	+	927	protein_coding	lectin, galactose binding, soluble 7 [Source:MGI Symbol;Acc:MGI:1316742]
ENSMUSG00000063779	Chil4	25.6455	9.05402	6.36407	5294.83	1146.82	2747.09	3	106201490	106219507	-	2817	protein_coding	chitinase-like 4 [Source:MGI Symbol;Acc:MGI:1341098]
ENSMUSG00000030695	Aldoa	2288.9	1916.57	1909.87	1022.48	893.3	1147.99	7	126795234	126808905	-	3501	protein_coding	aldolase A, fructose-bisphosphate [Source:MGI Symbol;Acc:MGI:87994]
ENSMUSG00000064367	mt-Nd5	2094.3	1687.53	1629.41	1282.74	992.994	1412.61	MT	11742	13565	+	1824	protein_coding	mitochondrially encoded NADH dehydrogenase 5 [Source:MGI Symbol;Acc:MGI:102496]
ENSMUSG00000027913	Crct1	1222.08	2352.66	1640.85	1164.39	1098.69	1095.26	3	93014205	93015687	-	792	protein_coding	cysteine-rich C-terminal 1 [Source:MGI Symbol;Acc:MGI:1921425]
ENSMUSG00000058354	Krt6a	6.68878	6.18202	6.24693	2384.88	3987.5	2165.53	15	101689932	101694307	-	2256	protein_coding	keratin 6A [Source:MGI Symbol;Acc:MGI:1100845]
ENSMUSG00000061527	Krt5	627.237	826.051	777.498	1500.74	2988.72	1638.22	15	101707070	101712891	-	2190	protein_coding	keratin 5 [Source:MGI Symbol;Acc:MGI:96702]
ENSMUSG00000056054	S100a8	2.52543	3.4411	1.36337	2307.93	2876.07	2647.96	3	90668978	90670035	+	694	protein_coding	S100 calcium binding protein A8 (calgranulin A) [Source:MGI Symbol;Acc:MGI:88244]
ENSMUSG00000043681	Fam25c	1273.52	2035.29	1447.22	1223.09	833.557	927.43	14	34351881	34355433	-	408	protein_coding	family with sequence similarity 25, member C [Source:MGI Symbol;Acc:MGI:1916384]
ENSMUSG00000064368	mt-Nd6	1820.93	1461.86	1360.21	1003.65	762.941	1039.73	MT	13552	14070	-	519	protein_coding	mitochondrially encoded NADH dehydrogenase 6 [Source:MGI Symbol;Acc:MGI:102495]
ENSMUSG00000045539	Sprr3	1096.74	1849.1	1342.49	980.01	1031.08	924.688	3	92456502	92458720	-	1222	protein_coding	small proline-rich protein 3 [Source:MGI Symbol;Acc:MGI:1330237]
ENSMUSG00000067274	Rplp0	1009.89	1251.35	1115.39	1226.92	1382.81	1223.04	5	115559467	115563727	+	1659	protein_coding	ribosomal protein, large, P0 [Source:MGI Symbol;Acc:MGI:1927636]
ENSMUSG00000024661	Fth1	1294.91	1233.17	1181.66	1208.54	966.439	1079.73	19	9982703	9985092	+	866	protein_coding	ferritin heavy polypeptide 1 [Source:MGI Symbol;Acc:MGI:95588]
ENSMUSG00000028464	Tpm2	1671.39	1313.1	1458.07	775.185	575.44	770.105	4	43514711	43523765	-	2909	protein_coding	tropomyosin 2, beta [Source:MGI Symbol;Acc:MGI:98810]
ENSMUSG00000026879	Gsn	1320.88	1337.29	1287.34	843.571	624.525	1090.81	2	35256380	35307892	+	3157	protein_coding	gelsolin [Source:MGI Symbol;Acc:MGI:95851]
ENSMUSG00000004951	Hspb1	1104.22	1173.63	1350.85	820.481	1010.8	1012.13	5	135887919	135889563	+	1031	protein_coding	heat shock protein 1 [Source:MGI Symbol;Acc:MGI:96240]
ENSMUSG00000028081	Rps3a1	906.711	1109.68	969.93	1037.61	1025.61	1045.52	3	86137940	86142702	-	977	protein_coding	ribosomal protein S3A1 [Source:MGI Symbol;Acc:MGI:1202063]
ENSMUSG00000056328	Myh1	1372.48	1119.69	1319	536.086	641.2	1000.85	11	67200052	67224575	+	6353	protein_coding	myosin, heavy polypeptide 1, skeletal muscle, adult [Source:MGI Symbol;Acc:MGI:1339711]
ENSMUSG00000060962	Dmkn	978.844	1314.03	1252.38	860.635	779.873	754.757	7	30763756	30781063	+	2192	protein_coding	dermokine [Source:MGI Symbol;Acc:MGI:1920962]
ENSMUSG00000003970	Rpl8	858.273	1019.19	955.305	1005.74	1147.63	946.84	15	76904071	76906318	+	862	protein_coding	ribosomal protein L8 [Source:MGI Symbol;Acc:MGI:1350927]
ENSMUSG00000063457	Rps15	922.193	1075.87	996.846	921.793	1041.82	955.573	10	80292453	80294114	+	630	protein_coding	ribosomal protein S15 [Source:MGI Symbol;Acc:MGI:98117]
ENSMUSG00000093674	Rpl41	825.598	1020.88	828.46	1036.76	1017.91	1103.62	10	128548114	128549305	-	1168	protein_coding	ribosomal protein L41 [Source:MGI Symbol;Acc:MGI:1915195]
ENSMUSG00000030399	Ckm	1568.41	1300.2	1285.21	550.861	423.143	492.209	7	19404776	19422841	+	2913	protein_coding	creatine kinase, muscle [Source:MGI Symbol;Acc:MGI:88413]
ENSMUSG00000033765	Calm4	670.302	997.647	910.01	995.909	1264.06	653.957	13	3837757	3838673	+	917	protein_coding	calmodulin 4 [Source:MGI Symbol;Acc:MGI:1931464]
ENSMUSG00000034994	Eef2	820.588	928.021	912.589	871.152	984.965	928.244	10	81176631	81182498	+	3324	protein_coding	eukaryotic translation elongation factor 2 [Source:MGI Symbol;Acc:MGI:95288]
ENSMUSG00000059230	Defb4	880.373	1554.38	1130.02	827.507	427.231	467.784	8	19198706	19201545	+	454	protein_coding	defensin beta 4 [Source:MGI Symbol;Acc:MGI:1927667]
ENSMUSG00000000031	H19	1109.6	912.38	1067.36	911.511	453.55	713.864	7	142575529	142578143	-	2372	lincRNA	H19, imprinted maternally expressed transcript [Source:MGI Symbol;Acc:MGI:95891]
ENSMUSG00000057863	Rpl36	809.981	993.554	816.873	782.357	850.746	785.27	17	56613395	56614243	+	404	protein_coding	ribosomal protein L36 [Source:MGI Symbol;Acc:MGI:1860603]
ENSMUSG00000041571	Selenow	1028.38	906.189	969.656	685.028	636.043	723.671	7	15917208	15922402	-	736	protein_coding	selenoprotein W [Source:MGI Symbol;Acc:MGI:1100878]
ENSMUSG00000019851	Perp	527.314	779.639	668.483	1038.69	1181.74	749.51	10	18845020	18857073	+	1952	protein_coding	PERP, TP53 apoptosis effector [Source:MGI Symbol;Acc:MGI:1929938]
ENSMUSG00000063651	Cnfn	626.23	959.767	813.057	703.372	1005.12	725.257	7	25367620	25369724	-	719	protein_coding	cornifelin [Source:MGI Symbol;Acc:MGI:1919633]
ENSMUSG00000053797	Krt16	1.20185	3.08244	0.350024	716.619	2901.82	1161.84	11	100246091	100248902	-	1565	protein_coding	keratin 16 [Source:MGI Symbol;Acc:MGI:96690]
ENSMUSG00000023944	Hsp90ab1	942.94	774.52	967.266	646.441	693.787	704.497	17	45567775	45573271	-	2999	protein_coding	heat shock protein 90 alpha (cytosolic), class B member 1 [Source:MGI Symbol;Acc:MGI:96247]
ENSMUSG00000026208	Des	1025.21	868.033	970.016	618.139	463.561	674.102	1	75360329	75368579	+	3754	protein_coding	desmin [Source:MGI Symbol;Acc:MGI:94885]
ENSMUSG00000024608	Rps14	659.066	832.22	689.267	795.333	767.634	831.98	18	60774510	60778546	+	1384	protein_coding	ribosomal protein S14 [Source:MGI Symbol;Acc:MGI:98107]
ENSMUSG00000060600	Eno3	1186.68	1025.31	1045.63	485.855	324.372	490.389	11	70657202	70662513	+	1739	protein_coding	enolase 3, beta muscle [Source:MGI Symbol;Acc:MGI:95395]
ENSMUSG00000055775	Myh8	1134.07	850.312	1024.08	581.133	428.357	454.465	11	67277124	67308634	+	11772	protein_coding	myosin, heavy polypeptide 8, skeletal muscle, perinatal [Source:MGI Symbol;Acc:MGI:1339712]
ENSMUSG00000059741	Myl3	1315.91	938.753	915.455	477.817	347.101	460.006	9	110741861	110769798	+	2044	protein_coding	myosin, light polypeptide 3 [Source:MGI Symbol;Acc:MGI:97268]
ENSMUSG00000038274	Fau	633.765	803.172	693.517	734.193	819.629	768.407	19	6057888	6059524	+	815	protein_coding	Finkel-Biskis-Reilly murine sarcoma virus (FBR-MuSV) ubiquitously expressed (fox derived) [Source:MGI Symbol;Acc:MGI:102547]
ENSMUSG00000032348	Gsta4	564.463	824.11	691.126	676.226	1009.44	669.001	9	78182774	78209349	+	1266	protein_coding	glutathione S-transferase, alpha 4 [Source:MGI Symbol;Acc:MGI:1309515]
ENSMUSG00000054325	Lce3a	580.79	1356.84	835.876	593.233	443.047	512.016	3	92925287	92926230	-	549	protein_coding	late cornified envelope 3A [Source:MGI Symbol;Acc:MGI:3645650]
ENSMUSG00000044594	Serpinb3a	476.906	773.893	614.837	849.969	791.056	761.603	1	107045587	107052303	-	1631	protein_coding	serine (or cysteine) peptidase inhibitor, clade B (ovalbumin), member 3A [Source:MGI Symbol;Acc:MGI:3573933]
ENSMUSG00000044533	Rps2	598.138	735.125	685.537	701.904	815.8	702.636	17	24718116	24721929	+	1830	protein_coding	ribosomal protein S2 [Source:MGI Symbol;Acc:MGI:105110]
ENSMUSG00000027533	Fabp5	453.265	590.651	460.852	918.996	965.076	796.829	3	10012548	10016607	+	3567	protein_coding	fatty acid binding protein 5, epidermal [Source:MGI Symbol;Acc:MGI:101790]
ENSMUSG00000060126	Tpt1	702.909	737.088	683.604	681.155	652.837	672.44	14	75845093	75848525	+	2380	protein_coding	tumor protein, translationally-controlled 1 [Source:MGI Symbol;Acc:MGI:104890]
ENSMUSG00000030730	Atp2a1	1024.16	750.82	923.491	523.267	372.888	434.266	7	126445858	126463108	-	3477	protein_coding	ATPase, Ca++ transporting, cardiac muscle, fast twitch 1 [Source:MGI Symbol;Acc:MGI:105058]
ENSMUSG00000034892	Rps29	793.204	775.71	643.001	576.415	568.301	652.339	12	69157722	69159186	-	693	protein_coding	ribosomal protein S29 [Source:MGI Symbol;Acc:MGI:107681]
ENSMUSG00000034634	Ly6d	426.211	692.62	513.182	778.239	943.889	575.376	15	74762056	74763620	-	744	protein_coding	lymphocyte antigen 6 complex, locus D [Source:MGI Symbol;Acc:MGI:96881]
ENSMUSG00000032648	Pygm	1005.75	829.639	888.161	457.049	285.462	429.871	19	6384399	6398459	+	3218	protein_coding	muscle glycogen phosphorylase [Source:MGI Symbol;Acc:MGI:97830]
ENSMUSG00000047281	Sfn	330.372	492.312	445.75	689.744	1166.99	694.057	4	133600556	133602168	-	1613	protein_coding	stratifin [Source:MGI Symbol;Acc:MGI:1891831]
ENSMUSG00000041984	Rptn	603.043	931.219	777.083	644.321	351.309	388.082	3	93393699	93399442	+	4146	protein_coding	repetin [Source:MGI Symbol;Acc:MGI:1099055]
ENSMUSG00000032399	Rpl4	571.458	666.462	585.328	608.738	647.088	598.272	9	64173375	64178666	+	2007	protein_coding	ribosomal protein L4 [Source:MGI Symbol;Acc:MGI:1915141]
ENSMUSG00000057841	Rpl32	526.998	663.566	557.716	610.506	644.204	629.985	6	115805505	115808747	-	963	protein_coding	ribosomal protein L32 [Source:MGI Symbol;Acc:MGI:98038]
ENSMUSG00000042031	Lce3b	474.939	968.593	605.827	495.636	485.721	556.348	3	92932979	92934097	+	562	protein_coding	late cornified envelope 3B [Source:MGI Symbol;Acc:MGI:1913594]
ENSMUSG00000027907	S100a11	336.961	462.67	394.785	710.868	953.995	725.576	3	93520488	93526287	+	511	protein_coding	S100 calcium binding protein A11 [Source:MGI Symbol;Acc:MGI:1338798]
ENSMUSG00000039001	Rps21	551.338	685.008	546.373	587.551	568.718	566.905	2	180257377	180258445	+	810	protein_coding	ribosomal protein S21 [Source:MGI Symbol;Acc:MGI:1913731]
ENSMUSG00000059956	Serpinb12	457.765	651.218	538.657	803.575	553.778	459.569	1	106934449	106957080	+	2498	protein_coding	serine (or cysteine) peptidase inhibitor, clade B (ovalbumin), member 12 [Source:MGI Symbol;Acc:MGI:1919119]
ENSMUSG00000107176	Gm9794	524.087	592.345	529.068	613.471	544.953	588.714	6	66875321	66875743	-	423	processed_pseudogene	predicted pseudogene 9794 [Source:MGI Symbol;Acc:MGI:3642653]
ENSMUSG00000007877	Tcap	649.916	677.593	765.841	453.461	409.42	418.171	11	98383811	98384953	+	948	protein_coding	titin-cap [Source:MGI Symbol;Acc:MGI:1330233]
ENSMUSG00000003429	Rps11	476.697	584.525	543.815	588.373	622.099	528.692	7	45122379	45124439	-	865	protein_coding	ribosomal protein S11 [Source:MGI Symbol;Acc:MGI:1351329]
ENSMUSG00000042045	Sln	810.16	710.639	699.677	388.122	297.317	426.298	9	53850164	53854560	+	1318	protein_coding	sarcolipin [Source:MGI Symbol;Acc:MGI:1913652]
ENSMUSG00000037563	Rps16	448.275	585.638	492.324	559.162	613.128	605.901	7	28350652	28353155	+	1266	protein_coding	ribosomal protein S16 [Source:MGI Symbol;Acc:MGI:98118]
ENSMUSG00000068614	Actc1	865.915	859.105	915.523	213.825	230.628	156.227	2	114047282	114053548	-	1618	protein_coding	actin, alpha, cardiac muscle 1 [Source:MGI Symbol;Acc:MGI:87905]
ENSMUSG00000071858	Gm94	516.856	788.081	617.226	490.998	415.782	346.119	18	43777196	43792878	-	748	protein_coding	predicted gene 94 [Source:MGI Symbol;Acc:MGI:2684940]
ENSMUSG00000054146	Krt15	523.47	628.346	663.815	544.585	467.937	346.613	11	100131758	100135928	-	1767	protein_coding	keratin 15 [Source:MGI Symbol;Acc:MGI:96689]
ENSMUSG00000049517	Rps23	492.878	576.05	488.759	489.043	564.569	535.047	13	90922958	90924950	+	1268	protein_coding	ribosomal protein S23 [Source:MGI Symbol;Acc:MGI:1913725]
ENSMUSG00000031320	Rps4x	461.574	573.823	497.774	549.307	529.09	533.816	X	102184941	102189394	-	1631	protein_coding	ribosomal protein S4, X-linked [Source:MGI Symbol;Acc:MGI:98158]
ENSMUSG00000027401	Tgm3	468.414	571.267	572.283	535.398	617.953	374.831	2	130012349	130050399	+	4135	protein_coding	transglutaminase 3, E polypeptide [Source:MGI Symbol;Acc:MGI:98732]
ENSMUSG00000028367	Txn1	235.213	280.031	240.75	895.911	892.658	588.729	4	57943373	57956411	-	1051	protein_coding	thioredoxin 1 [Source:MGI Symbol;Acc:MGI:98874]
ENSMUSG00000060802	B2m	219.454	392.152	190.278	691.315	631.631	970.593	2	122147686	122153083	+	860	protein_coding	beta-2 microglobulin [Source:MGI Symbol;Acc:MGI:88127]
ENSMUSG00000026238	Ptma	441.715	517.971	503.063	490.955	606.581	517.806	1	86526726	86530712	+	1462	protein_coding	prothymosin alpha [Source:MGI Symbol;Acc:MGI:97803]
ENSMUSG00000028495	Rps6	441.302	544.36	467.06	524.273	550.672	480.631	4	86854660	86857412	-	1586	protein_coding	ribosomal protein S6 [Source:MGI Symbol;Acc:MGI:98159]
ENSMUSG00000063130	Calml3	548.528	903.857	732.544	303.513	250.476	232.315	13	3802896	3804316	-	1421	protein_coding	calmodulin-like 3 [Source:MGI Symbol;Acc:MGI:1917655]
ENSMUSG00000022108	Itm2b	459.18	537.456	486.079	523.568	479.681	480.045	14	73362231	73385271	-	1773	protein_coding	integral membrane protein 2B [Source:MGI Symbol;Acc:MGI:1309517]
ENSMUSG00000017697	Ada	735.441	1059.53	975.331	59.9752	37.9915	63.7859	2	163726584	163750239	-	2002	protein_coding	adenosine deaminase [Source:MGI Symbol;Acc:MGI:87916]
ENSMUSG00000061816	Myl1	745.134	594.613	592.135	263.187	243.159	466.305	1	66924295	66945404	-	2074	protein_coding	myosin, light polypeptide 1 [Source:MGI Symbol;Acc:MGI:97269]
ENSMUSG00000090733	Rps27	472.559	599.023	425.749	484.917	456.852	442.538	3	90212522	90213651	-	1043	protein_coding	ribosomal protein S27 [Source:MGI Symbol;Acc:MGI:1888676]
ENSMUSG00000041697	Cox6a1	366.216	470.413	426.766	485.797	565.515	503.658	5	115345642	115348981	-	702	protein_coding	cytochrome c oxidase subunit VIa polypeptide 1 [Source:MGI Symbol;Acc:MGI:103099]
ENSMUSG00000071528	Usmg5	576.904	524.967	451.548	400.475	357.669	506.764	19	47083471	47090625	-	341	protein_coding	upregulated during skeletal muscle growth 5 [Source:MGI Symbol;Acc:MGI:1891435]
ENSMUSG00000031633	Slc25a4	698.93	553.826	580.316	311.962	258.263	395.066	8	46206797	46211284	-	2353	protein_coding	solute carrier family 25 (mitochondrial carrier, adenine nucleotide translocator), member 4 [Source:MGI Symbol;Acc:MGI:1353495]
ENSMUSG00000032366	Tpm1	701.475	566.956	596.296	339.153	266.199	324.91	9	67022590	67049406	-	6485	protein_coding	tropomyosin 1, alpha [Source:MGI Symbol;Acc:MGI:98809]
ENSMUSG00000027559	Car3	849.355	604.675	651.522	257.474	188.311	243.272	3	14863512	14872523	+	2865	protein_coding	carbonic anhydrase 3 [Source:MGI Symbol;Acc:MGI:88270]
ENSMUSG00000023092	Fhl1	677.791	554.683	574.014	295.77	255.612	413.978	X	56731787	56793346	+	3714	protein_coding	four and a half LIM domains 1 [Source:MGI Symbol;Acc:MGI:1298387]
ENSMUSG00000041841	Rpl37	449.071	564.997	437.276	465.107	412.987	436.87	15	5116613	5119140	+	867	protein_coding	ribosomal protein L37 [Source:MGI Symbol;Acc:MGI:1914531]
ENSMUSG00000017404	Rpl19	415.429	518.284	414.568	445.997	500.64	437.163	11	98026710	98030492	+	1022	protein_coding	ribosomal protein L19 [Source:MGI Symbol;Acc:MGI:98020]
ENSMUSG00000042306	S100a14	448.564	706.204	564.886	322.401	352.329	311.448	3	90526856	90528837	+	1727	protein_coding	S100 calcium binding protein A14 [Source:MGI Symbol;Acc:MGI:1913416]
ENSMUSG00000057322	Rpl38	445.221	527.062	395.634	444.284	413.346	449.622	11	114668524	114672331	+	542	protein_coding	ribosomal protein L38 [Source:MGI Symbol;Acc:MGI:1914921]
ENSMUSG00000045128	Rpl18a	381.729	483.777	407.669	438.971	455.513	492.305	8	70894722	70897412	-	1739	protein_coding	ribosomal protein L18A [Source:MGI Symbol;Acc:MGI:1924058]
ENSMUSG00000049775	Tmsb4x	384.572	390.67	366.245	460.536	431.877	578.515	X	167207093	167209315	-	1371	protein_coding	thymosin, beta 4, X chromosome [Source:MGI Symbol;Acc:MGI:99510]
ENSMUSG00000040694	Apobec2	769.526	614.168	607.766	237.164	165.478	216.458	17	48419231	48432728	-	1218	protein_coding	apolipoprotein B mRNA editing enzyme, catalytic polypeptide 2 [Source:MGI Symbol;Acc:MGI:1343178]
ENSMUSG00000019102	Aldh3a1	487.106	805.666	665.001	221.769	268.876	146.719	11	61207537	61218421	+	1942	protein_coding	aldehyde dehydrogenase family 3, subfamily A1 [Source:MGI Symbol;Acc:MGI:1353451]
ENSMUSG00000012848	Rps5	387.859	480.324	410.481	424.648	430.494	455.509	7	12922290	12926686	+	1734	protein_coding	ribosomal protein S5 [Source:MGI Symbol;Acc:MGI:1097682]
ENSMUSG00000061787	Rps17	393.62	465.553	389.83	427.243	429.918	457.759	7	81342732	81345254	-	1274	protein_coding	ribosomal protein S17 [Source:MGI Symbol;Acc:MGI:1309526]
ENSMUSG00000025362	Rps26	353.525	461.817	379.232	442.748	476.562	441.238	10	128624534	128626747	-	1544	protein_coding	ribosomal protein S26 [Source:MGI Symbol;Acc:MGI:1351628]
ENSMUSG00000045475	Lce3c	350.65	666.316	432.995	386.044	352.505	361.188	3	92944486	92945733	+	567	protein_coding	late cornified envelope 3C [Source:MGI Symbol;Acc:MGI:2135932]
ENSMUSG00000073702	Rpl31	378.838	473.199	397.312	416.46	425.028	451.861	1	39367842	39371911	+	1662	protein_coding	ribosomal protein L31 [Source:MGI Symbol;Acc:MGI:2149632]
ENSMUSG00000046330	Rpl37a	395.733	499.948	386.665	423.78	403.347	399.516	1	72711290	72713813	+	1410	protein_coding	ribosomal protein L37a [Source:MGI Symbol;Acc:MGI:98068]
ENSMUSG00000025488	Cox8b	661.281	498.72	473.504	266.162	206.945	383.066	7	140898945	140900446	-	360	protein_coding	cytochrome c oxidase subunit VIIIb [Source:MGI Symbol;Acc:MGI:105958]
ENSMUSG00000047675	Rps8	387.898	463.678	399.718	389.036	443.186	397.92	4	117153827	117156243	-	1726	protein_coding	ribosomal protein S8 [Source:MGI Symbol;Acc:MGI:98166]
ENSMUSG00000019505	Ubb	410.427	398.781	425.356	448.451	368.729	359.36	11	62551171	62553213	+	1675	protein_coding	ubiquitin B [Source:MGI Symbol;Acc:MGI:98888]
ENSMUSG00000081895	Rpl17-ps10	451.891	529.174	355.68	400.111	297.518	375.827	7	72648757	72649311	-	555	processed_pseudogene	ribosomal protein L17, pseudogene 10 [Source:MGI Symbol;Acc:MGI:3642871]
ENSMUSG00000000740	Rpl13	349.492	429.053	371.927	376.565	429.387	420.434	8	123102350	123105244	+	2595	protein_coding	ribosomal protein L13 [Source:MGI Symbol;Acc:MGI:105922]
ENSMUSG00000003955	Fam162a	183.04	236.029	205.783	486.78	710.786	516.003	16	36043844	36071515	-	635	protein_coding	family with sequence similarity 162, member A [Source:MGI Symbol;Acc:MGI:1917436]
ENSMUSG00000063229	Ldha	446.964	439.458	403.431	327.181	353.007	363.162	7	46841475	46855627	+	3310	protein_coding	lactate dehydrogenase A [Source:MGI Symbol;Acc:MGI:96759]
ENSMUSG00000020475	Pgam2	623.045	449.877	520.635	250.921	176.942	298.542	11	5801640	5803733	-	840	protein_coding	phosphoglycerate mutase 2 [Source:MGI Symbol;Acc:MGI:1933118]
ENSMUSG00000030432	Rpl28	340.168	402.191	379.445	350.77	447.321	381.8	7	4792874	4795066	+	1840	protein_coding	ribosomal protein L28 [Source:MGI Symbol;Acc:MGI:101839]
ENSMUSG00000025068	Gsto1	165.343	308.685	234.773	532.813	586.243	452.395	19	47854970	47864790	+	1968	protein_coding	glutathione S-transferase omega 1 [Source:MGI Symbol;Acc:MGI:1342273]
ENSMUSG00000025393	Atp5b	424.075	385.842	404.573	330.144	341.808	383.61	10	128083273	128090391	+	4237	protein_coding	ATP synthase, H+ transporting mitochondrial F1 complex, beta subunit [Source:MGI Symbol;Acc:MGI:107801]
ENSMUSG00000027447	Cst3	332.424	346.184	299.108	460.628	374.63	442.261	2	148871722	148875692	-	1266	protein_coding	cystatin C [Source:MGI Symbol;Acc:MGI:102519]
ENSMUSG00000025794	Rpl14	333.747	413.951	353.478	403.157	412.553	320.739	9	120571444	120574654	+	1651	protein_coding	ribosomal protein L14 [Source:MGI Symbol;Acc:MGI:1914365]
ENSMUSG00000032294	Pkm	377.864	367.268	352.495	330.787	399.718	403.567	9	59656368	59679375	+	5001	protein_coding	pyruvate kinase, muscle [Source:MGI Symbol;Acc:MGI:97591]
ENSMUSG00000062933	Gm10123	262.33	275.755	288.528	442.029	499.575	427.551	9	96895658	96896147	+	490	processed_pseudogene	predicted pseudogene 10123 [Source:MGI Symbol;Acc:MGI:3704342]
ENSMUSG00000015656	Hspa8	462.838	349.029	451.015	270.044	273.74	330.935	9	40800984	40810087	+	4301	protein_coding	heat shock protein 8 [Source:MGI Symbol;Acc:MGI:105384]
ENSMUSG00000058546	Rpl23a	315.736	384.694	324.31	353.28	367.426	373.032	11	78180932	78183584	-	847	protein_coding	ribosomal protein L23A [Source:MGI Symbol;Acc:MGI:3040672]
ENSMUSG00000030785	Cox6a2	523.217	382.521	448.482	234.481	179.602	347.962	7	128205435	128206387	-	680	protein_coding	cytochrome c oxidase subunit VIa polypeptide 2 [Source:MGI Symbol;Acc:MGI:104649]
ENSMUSG00000025428	Atp5a1	401.486	365.966	377.041	300.689	312.57	350.751	18	77773729	77782869	+	3135	protein_coding	ATP synthase, H+ transporting, mitochondrial F1 complex, alpha subunit 1 [Source:MGI Symbol;Acc:MGI:88115]
ENSMUSG00000057454	Lypd3	204.016	291.47	282.636	383.163	547.919	393.39	7	24636550	24641118	+	1649	protein_coding	Ly6/Plaur domain containing 3 [Source:MGI Symbol;Acc:MGI:1919684]
ENSMUSG00000029580	Actb	316.115	317.436	316.285	360.544	392.234	397.052	5	142903115	142906754	-	2679	protein_coding	actin, beta [Source:MGI Symbol;Acc:MGI:87904]
ENSMUSG00000025492	Ifitm3	181.519	262.341	172.092	402.252	508.144	572.413	7	141009586	141010770	-	678	protein_coding	interferon induced transmembrane protein 3 [Source:MGI Symbol;Acc:MGI:1913391]
ENSMUSG00000004558	Ndrg2	526.348	415.934	460.887	258.988	180.492	248.53	14	51905271	51913488	-	2157	protein_coding	N-myc downstream regulated gene 2 [Source:MGI Symbol;Acc:MGI:1352498]
ENSMUSG00000035783	Acta2	469.239	439.383	484.399	219.781	171.076	295.784	19	34241090	34255336	-	1781	protein_coding	actin, alpha 2, smooth muscle, aorta [Source:MGI Symbol;Acc:MGI:87909]
ENSMUSG00000061477	Rps7	292.974	373.377	309.198	357.727	354.336	375.843	12	28630854	28635953	-	2015	protein_coding	ribosomal protein S7 [Source:MGI Symbol;Acc:MGI:1333818]
ENSMUSG00000064337	mt-Rnr1	488.62	367.396	353.337	264.154	223.937	365.475	MT	70	1024	+	955	Mt_rRNA	mitochondrially encoded 12S rRNA [Source:MGI Symbol;Acc:MGI:102493]
ENSMUSG00000063316	Rpl27	297.116	374.228	313.651	312.456	396.933	358.191	11	101442298	101445529	+	1535	protein_coding	ribosomal protein L27 [Source:MGI Symbol;Acc:MGI:98036]
ENSMUSG00000073601	Serpinb3c	338.373	145.159	258.78	470.372	176.882	658.569	1	107271201	107278371	-	1659	protein_coding	serine (or cysteine) peptidase inhibitor, clade B, member 3C [Source:MGI Symbol;Acc:MGI:1277952]
ENSMUSG00000042212	Sprr2d	0.564945	1.40272	0.146252	348.874	870.787	815.083	3	92339140	92340873	+	681	protein_coding	small proline-rich protein 2D [Source:MGI Symbol;Acc:MGI:1330347]
ENSMUSG00000060803	Gstp1	252.645	304.872	284.518	397.087	500.528	290.396	19	4035407	4037921	-	757	protein_coding	glutathione S-transferase, pi 1 [Source:MGI Symbol;Acc:MGI:95865]
ENSMUSG00000069516	Lyz2	219.779	260.843	184.513	483.569	403.322	466.507	10	117277331	117282321	-	1316	protein_coding	lysozyme 2 [Source:MGI Symbol;Acc:MGI:96897]
ENSMUSG00000008668	Rps18	286.585	360.778	302.111	343.395	356.109	362.98	17	33951999	33956001	-	2491	protein_coding	ribosomal protein S18 [Source:MGI Symbol;Acc:MGI:98146]
ENSMUSG00000032518	Rpsa	281.392	349.57	309.193	339.572	357.416	362.225	9	120127689	120132369	+	3170	protein_coding	ribosomal protein SA [Source:MGI Symbol;Acc:MGI:105381]
ENSMUSG00000014846	Tppp3	469.506	348.863	396.45	276.5	244.902	247.624	8	105467493	105471526	-	1848	protein_coding	tubulin polymerization-promoting protein family member 3 [Source:MGI Symbol;Acc:MGI:1915221]
ENSMUSG00000004207	Psap	349.832	315.051	313.874	328.205	315.097	333.945	10	60277627	60302597	+	2744	protein_coding	prosaposin [Source:MGI Symbol;Acc:MGI:97783]
ENSMUSG00000030693	Klk10	158.785	294.402	264.663	315.537	558.862	351.372	7	43781035	43785410	+	1373	protein_coding	kallikrein related-peptidase 10 [Source:MGI Symbol;Acc:MGI:1916790]
ENSMUSG00000062997	Rpl35	262.513	336.262	284.026	305.324	357.681	391.8	2	39001580	39005624	-	1241	protein_coding	ribosomal protein L35 [Source:MGI Symbol;Acc:MGI:1913739]
ENSMUSG00000113948	AC147029.1	288.315	380.811	303.003	341.973	340.295	277.693	12	67510756	67511311	+	556	processed_pseudogene
ENSMUSG00000060938	Rpl26	300.18	359.74	293.999	326.314	306.773	329.278	11	68901583	68906989	+	1444	protein_coding	ribosomal protein L26 [Source:MGI Symbol;Acc:MGI:106022]
ENSMUSG00000074457	S100a16	296.827	453.374	377.787	255.216	304.117	223.937	3	90537254	90543151	+	1617	protein_coding	S100 calcium binding protein A16 [Source:MGI Symbol;Acc:MGI:1915110]
ENSMUSG00000008682	Rpl10	269.915	341.875	292.122	321.1	333.27	340.058	X	74270812	74273135	+	2053	protein_coding	ribosomal protein L10 [Source:MGI Symbol;Acc:MGI:105943]
ENSMUSG00000006333	Rps9	271.91	312.123	286.807	329.051	365.217	328.726	7	3703993	3706897	+	2522	protein_coding	ribosomal protein S9 [Source:MGI Symbol;Acc:MGI:1924096]
ENSMUSG00000024610	Cd74	147.524	274.482	123.12	416.462	390.051	532.324	18	60803848	60812646	+	1410	protein_coding	CD74 antigen (invariant polypeptide of major histocompatibility complex, class II antigen-associated) [Source:MGI Symbol;Acc:MGI:96534]
ENSMUSG00000068885	Lce3f	319.522	617.395	397.249	210.226	148.184	170.554	3	92992226	92993426	+	611	protein_coding	late cornified envelope 3F [Source:MGI Symbol;Acc:MGI:1916770]
ENSMUSG00000030122	Ptms	338.706	299.26	338.41	254.356	311.217	319.464	6	124913681	124920103	-	1619	protein_coding	parathymosin [Source:MGI Symbol;Acc:MGI:1916452]
ENSMUSG00000079641	Rpl39	291.303	352.856	257.363	323.854	270.634	319.811	X	37082520	37085402	-	1434	protein_coding	ribosomal protein L39 [Source:MGI Symbol;Acc:MGI:1914498]
ENSMUSG00000043716	Rpl7	263.628	322.872	272.087	313.784	320.606	318.832	1	16101295	16104662	-	2687	protein_coding	ribosomal protein L7 [Source:MGI Symbol;Acc:MGI:98073]
ENSMUSG00000068220	Lgals1	393.544	350.039	321.389	270.522	174.661	301.547	15	78926725	78930465	+	800	protein_coding	lectin, galactose binding, soluble 1 [Source:MGI Symbol;Acc:MGI:96777]
ENSMUSG00000023456	Tpi1	337.772	348.217	340.271	239.294	241.452	296.68	6	124810586	124814296	-	2753	protein_coding	triosephosphate isomerase 1 [Source:MGI Symbol;Acc:MGI:98797]
ENSMUSG00000035885	Cox8a	265.427	308.923	264.619	286.657	334.818	330.985	19	7215158	7217616	-	545	protein_coding	cytochrome c oxidase subunit VIIIa [Source:MGI Symbol;Acc:MGI:105959]
ENSMUSG00000071415	Rpl23	266.242	328.698	268.576	294.215	299.129	296.328	11	97777527	97782437	-	1770	protein_coding	ribosomal protein L23 [Source:MGI Symbol;Acc:MGI:1929455]
ENSMUSG00000016349	Eef1a2	425.855	371.832	369.787	183.404	146.794	251.859	2	181147653	181157014	-	2084	protein_coding	eukaryotic translation elongation factor 1 alpha 2 [Source:MGI Symbol;Acc:MGI:1096317]
ENSMUSG00000062825	Actg1	225.574	262.73	242.643	328.074	373.231	316.858	11	120345690	120348542	-	2658	protein_coding	actin, gamma, cytoplasmic 1 [Source:MGI Symbol;Acc:MGI:87906]
ENSMUSG00000074433	Lce3e	237.259	498.634	295.511	258.83	230.871	225.816	3	92967061	92968281	+	607	protein_coding	late cornified envelope 3E [Source:MGI Symbol;Acc:MGI:1916764]
ENSMUSG00000050359	Sprr1a	119.81	245.331	152.733	283.225	513.618	407.768	3	92483952	92485895	-	806	protein_coding	small proline-rich protein 1A [Source:MGI Symbol;Acc:MGI:106660]
ENSMUSG00000028378	Ptgr1	216.717	285.389	218.477	321.858	384.853	279.179	4	58965439	58987119	-	2296	protein_coding	prostaglandin reductase 1 [Source:MGI Symbol;Acc:MGI:1914353]
ENSMUSG00000064339	mt-Rnr2	478.14	290.47	305.907	210.496	135.909	257.641	MT	1094	2675	+	1582	Mt_rRNA	mitochondrially encoded 16S rRNA [Source:MGI Symbol;Acc:MGI:102492]
ENSMUSG00000030744	Rps3	230.091	287.108	254.326	289.031	298.938	290.501	7	99477896	99483738	-	4483	protein_coding	ribosomal protein S3 [Source:MGI Symbol;Acc:MGI:1350917]
ENSMUSG00000064354	mt-Co2	476.597	193.494	274.549	331.808	150.662	210.321	MT	7013	7696	+	684	protein_coding	mitochondrially encoded cytochrome c oxidase II [Source:MGI Symbol;Acc:MGI:102503]
ENSMUSG00000073411	H2-D1	142.166	225.478	143.932	328.309	365.21	421.266	17	35262730	35267499	+	2579	protein_coding	histocompatibility 2, D region locus 1 [Source:MGI Symbol;Acc:MGI:95896]
ENSMUSG00000078812	Eif5a	230.804	279.743	250.021	255.22	340.741	267.108	11	69916714	69921958	-	2377	protein_coding	eukaryotic translation initiation factor 5A [Source:MGI Symbol;Acc:MGI:106248]
ENSMUSG00000036751	Cox6b1	299.414	287.115	271.924	238.038	227.082	285.609	7	30616861	30626151	-	708	protein_coding	cytochrome c oxidase, subunit VIb polypeptide 1 [Source:MGI Symbol;Acc:MGI:107460]
ENSMUSG00000055839	Elob	258.841	282.438	268.894	260.403	271.261	265.479	17	23824740	23829109	-	508	protein_coding	elongin B [Source:MGI Symbol;Acc:MGI:1914923]
ENSMUSG00000044737	Klk14	167.055	274.249	271.915	233.519	325.095	332.251	7	43690418	43695536	+	1271	protein_coding	kallikrein related-peptidase 14 [Source:MGI Symbol;Acc:MGI:2447564]
ENSMUSG00000032060	Cryab	407.966	292.033	404.35	147.192	109.564	242.438	9	50751325	50756636	+	1479	protein_coding	crystallin, alpha B [Source:MGI Symbol;Acc:MGI:88516]
ENSMUSG00000015932	Dstn	245.144	308.094	279.457	255.432	265.058	242.512	2	143915320	143943324	+	1911	protein_coding	destrin [Source:MGI Symbol;Acc:MGI:1929270]
ENSMUSG00000061100	Retnla	261.06	252.39	211.52	279.907	218.019	370.394	16	48842552	48844461	+	598	protein_coding	resistin like alpha [Source:MGI Symbol;Acc:MGI:1888504]
ENSMUSG00000026574	Dpt	350.039	326.054	286.632	276.974	137.184	202.646	1	164796644	164824266	+	1724	protein_coding	dermatopontin [Source:MGI Symbol;Acc:MGI:1928392]
ENSMUSG00000022354	Ndufb9	337.121	293.325	285.712	200.628	202.916	258.346	15	58933810	58939489	+	651	protein_coding	NADH dehydrogenase (ubiquinone) 1 beta subcomplex, 9 [Source:MGI Symbol;Acc:MGI:1913468]
ENSMUSG00000033065	Pfkm	407.569	311.66	361.61	163.66	115.831	207.856	15	98092589	98132447	+	2957	protein_coding	phosphofructokinase, muscle [Source:MGI Symbol;Acc:MGI:97548]
ENSMUSG00000064372	mt-Tp	376.433	265.902	261.63	297.476	174.506	190.223	MT	15356	15422	-	67	Mt_tRNA	mitochondrially encoded tRNA proline [Source:MGI Symbol;Acc:MGI:102478]
ENSMUSG00000026413	Pkp1	162.796	214.199	202.972	300.73	432.829	252.438	1	135871395	135919207	-	5024	protein_coding	plakophilin 1 [Source:MGI Symbol;Acc:MGI:1328359]
ENSMUSG00000020585	Laptm4a	273.579	293.471	279.441	244.201	220.647	243.582	12	8921664	8938742	+	1773	protein_coding	lysosomal-associated protein transmembrane 4A [Source:MGI Symbol;Acc:MGI:108017]
ENSMUSG00000024659	Anxa1	119.195	147.921	118.673	319.113	470.426	361.899	19	20373428	20390944	-	2608	protein_coding	annexin A1 [Source:MGI Symbol;Acc:MGI:96819]
ENSMUSG00000059291	Rpl11	217.874	275.684	220.651	266.678	268.764	285.127	4	136028265	136053428	-	2697	protein_coding	ribosomal protein L11 [Source:MGI Symbol;Acc:MGI:1914275]
ENSMUSG00000029632	Ndufa4	233.765	246.421	199.7	276.224	262.395	304.58	6	11900292	11907497	-	1381	protein_coding	NADH dehydrogenase (ubiquinone) 1 alpha subcomplex, 4 [Source:MGI Symbol;Acc:MGI:107686]
ENSMUSG00000072940	Gm10443	231.854	234.036	221.249	246.301	266.072	317.533	6	86334031	86334240	+	210	processed_pseudogene	predicted pseudogene 10443 [Source:MGI Symbol;Acc:MGI:3704272]
ENSMUSG00000020163	Uqcr11	298.966	285.979	259.715	194.471	204.033	263.546	10	80402997	80406830	-	641	protein_coding	ubiquinol-cytochrome c reductase, complex III subunit XI [Source:MGI Symbol;Acc:MGI:1913844]
ENSMUSG00000036256	Igfbp7	175.092	173.154	175.799	299.838	328.024	339.678	5	77349240	77408041	-	1209	protein_coding	insulin-like growth factor binding protein 7 [Source:MGI Symbol;Acc:MGI:1352480]
ENSMUSG00000002985	Apoe	129.602	154.48	126.36	423.047	277.653	376.117	7	19696109	19699188	-	2138	protein_coding	apolipoprotein E [Source:MGI Symbol;Acc:MGI:88057]
ENSMUSG00000031818	Cox4i1	273.888	269.411	256.898	223.803	212.638	243.317	8	120668222	120674207	+	1550	protein_coding	cytochrome c oxidase subunit 4I1 [Source:MGI Symbol;Acc:MGI:88473]
ENSMUSG00000025130	P4hb	229.172	274.238	262.78	260.5	232.71	219.853	11	120560298	120573253	-	2861	protein_coding	prolyl 4-hydroxylase, beta polypeptide [Source:MGI Symbol;Acc:MGI:97464]
ENSMUSG00000060036	Rpl3	194.207	259.118	219.201	260.413	283.987	261.425	15	80077794	80091868	-	3119	protein_coding	ribosomal protein L3 [Source:MGI Symbol;Acc:MGI:1351605]
ENSMUSG00000030189	Ybx3	289.057	254.858	279.343	194.304	199.505	226.346	6	131364855	131388476	-	3075	protein_coding	Y box protein 3 [Source:MGI Symbol;Acc:MGI:2137670]
ENSMUSG00000067038	Rps12-ps3	178.605	249.061	211.292	286.706	275.71	240.795	19	59322290	59322783	+	494	protein_coding	ribosomal protein S12, pseudogene 3 [Source:MGI Symbol;Acc:MGI:3704503]
ENSMUSG00000092586	Ly6g6c	169.614	255.968	230.561	312.341	285.789	186.1	17	35065388	35070050	+	1367	protein_coding	lymphocyte antigen 6 complex, locus G6C [Source:MGI Symbol;Acc:MGI:2148930]
ENSMUSG00000048758	Rpl29	198.172	251.835	207.51	263.159	277.151	235.142	9	106429454	106431568	+	1126	protein_coding	ribosomal protein L29 [Source:MGI Symbol;Acc:MGI:99687]
ENSMUSG00000011884	Gltp	249.474	279.88	294.864	181.735	240.045	178.916	5	114669398	114690984	-	1762	protein_coding	glycolipid transfer protein [Source:MGI Symbol;Acc:MGI:1929253]
ENSMUSG00000068697	Myoz1	398.759	334.11	333.141	137.156	102.647	114.098	14	20649107	20656540	-	1892	protein_coding	myozenin 1 [Source:MGI Symbol;Acc:MGI:1929471]
ENSMUSG00000029614	Rpl6	195.781	250.829	207.474	246.636	272.733	241.438	5	121204481	121209241	+	3140	protein_coding	ribosomal protein L6 [Source:MGI Symbol;Acc:MGI:108057]
ENSMUSG00000031765	Mt1	193.633	173.187	158.429	407.435	303.566	177.598	8	94179082	94180327	+	1246	protein_coding	metallothionein 1 [Source:MGI Symbol;Acc:MGI:97171]
ENSMUSG00000099764	Rps10-ps2	195.984	254.894	224.496	240.922	267.65	228.824	16	20822145	20822640	-	496	processed_pseudogene	ribosomal protein S10, pseudogene 2 [Source:MGI Symbol;Acc:MGI:3645627]
ENSMUSG00000046721	Rpl14-ps1	193.575	227.841	218.566	284.692	265.558	222.347	7	45324965	45325617	+	653	processed_pseudogene	ribosomal protein L14, pseudogene 1 [Source:MGI Symbol;Acc:MGI:3710579]
ENSMUSG00000067818	Myl9	362.324	327.35	366.506	116.916	86.0733	152.729	2	156775420	156781658	+	1162	protein_coding	myosin, light polypeptide 9, regulatory [Source:MGI Symbol;Acc:MGI:2138915]
ENSMUSG00000058135	Gstm1	242.323	270.914	281.28	183.684	239.684	171.69	3	108012255	108017973	-	1473	protein_coding	glutathione S-transferase, mu 1 [Source:MGI Symbol;Acc:MGI:95860]
ENSMUSG00000059534	Uqcr10	269.734	253.043	236.033	187.252	192.969	241.414	11	4701973	4704342	-	584	protein_coding	ubiquinol-cytochrome c reductase, complex III subunit X [Source:MGI Symbol;Acc:MGI:1913402]
ENSMUSG00000020061	Mybpc1	365.247	255.493	300.553	162.47	121.496	173.427	10	88518279	88605152	-	4527	protein_coding	myosin binding protein C, slow-type [Source:MGI Symbol;Acc:MGI:1336213]
ENSMUSG00000027484	Bpifa5	55.348	12.1051	43.3053	474.88	394.27	398.181	2	154162607	154168450	+	1089	protein_coding	BPI fold containing family A, member 5 [Source:MGI Symbol;Acc:MGI:1914385]
ENSMUSG00000033307	Mif	177.761	234.966	203.941	214.911	304.791	240.173	10	75859353	75860240	-	745	protein_coding	macrophage migration inhibitory factor (glycosylation-inhibiting factor) [Source:MGI Symbol;Acc:MGI:96982]
ENSMUSG00000064349	mt-Tc	370.479	295.983	247.485	168.362	103.804	184.901	MT	5192	5257	-	66	Mt_tRNA	mitochondrially encoded tRNA cysteine [Source:MGI Symbol;Acc:MGI:102490]
ENSMUSG00000054889	Dsp	144.985	198.443	181.717	264.382	361.484	217.22	13	38151294	38198577	+	9659	protein_coding	desmoplakin [Source:MGI Symbol;Acc:MGI:109611]
ENSMUSG00000028148	Them5	168.353	247.559	218.112	275.937	254.564	195.891	3	94342099	94347352	+	1540	protein_coding	thioesterase superfamily member 5 [Source:MGI Symbol;Acc:MGI:1913448]
ENSMUSG00000024164	C3	150.917	150.448	136.964	351.996	233.901	333.752	17	57203970	57228136	-	5143	protein_coding	complement component 3 [Source:MGI Symbol;Acc:MGI:88227]
ENSMUSG00000037805	Rpl10a	188.005	245.766	204.601	228.753	252.765	237.542	17	28328471	28331032	+	2349	protein_coding	ribosomal protein L10A [Source:MGI Symbol;Acc:MGI:1343877]
ENSMUSG00000035242	Oaz1	253.293	245.086	248.76	195.169	203.935	208.804	10	80826656	80829290	+	2558	protein_coding	ornithine decarboxylase antizyme 1 [Source:MGI Symbol;Acc:MGI:109433]
ENSMUSG00000060586	H2-Eb1	94.0879	225.742	76.9695	304.605	262.812	386.741	17	34305877	34316199	+	1184	protein_coding	histocompatibility 2, class II antigen E beta [Source:MGI Symbol;Acc:MGI:95901]
ENSMUSG00000026185	Igfbp5	390.593	218.168	248.563	162.849	98.1618	226.184	1	72857932	72874884	-	6006	protein_coding	insulin-like growth factor binding protein 5 [Source:MGI Symbol;Acc:MGI:96440]
ENSMUSG00000022982	Sod1	260.125	257.666	240.437	186.14	189.626	203.286	16	90220742	90226322	+	646	protein_coding	superoxide dismutase 1, soluble [Source:MGI Symbol;Acc:MGI:98351]
ENSMUSG00000064348	mt-Tn	433.496	267.739	246.89	173.274	61.2475	154.281	MT	5089	5159	-	71	Mt_tRNA	mitochondrially encoded tRNA asparagine [Source:MGI Symbol;Acc:MGI:102479]
ENSMUSG00000028639	Ybx1	277.85	230.264	253.087	172.547	195.899	205.009	4	119277981	119294604	-	2531	protein_coding	Y box protein 1 [Source:MGI Symbol;Acc:MGI:99146]
ENSMUSG00000024381	Bin1	347.003	266.757	284.388	155.474	103.305	167.348	18	32377217	32435736	+	2451	protein_coding	bridging integrator 1 [Source:MGI Symbol;Acc:MGI:108092]
ENSMUSG00000063856	Gpx1	138.952	182.797	150.779	237.304	340.294	264.584	9	108338903	108340343	+	1441	protein_coding	glutathione peroxidase 1 [Source:MGI Symbol;Acc:MGI:104887]
ENSMUSG00000083596	Rpl21-ps15	167.184	230.407	214.661	255.896	229.753	215.235	X	151215167	151215649	-	483	processed_pseudogene	ribosomal protein L21, pseudogene 15 [Source:MGI Symbol;Acc:MGI:3705426]
ENSMUSG00000050621	Rps27rt	204.479	212.76	217.171	263.154	227.718	183.194	9	114982366	114982739	-	374	protein_coding	ribosomal protein S27, retrogene [Source:MGI Symbol;Acc:MGI:3704345]
ENSMUSG00000062328	Rpl17	117.376	173.362	222.713	229.009	321.313	240.926	18	75000477	75003381	+	775	protein_coding	ribosomal protein L17 [Source:MGI Symbol;Acc:MGI:2448270]
ENSMUSG00000067870	Rpl31-ps8	173.365	233.126	196.429	303.765	194.051	202.411	15	90764279	90764656	-	378	processed_pseudogene	ribosomal protein L31, pseudogene 8 [Source:MGI Symbol;Acc:MGI:3647726]
ENSMUSG00000061232	H2-K1	74.7754	146.273	73.839	287.682	335.147	383.97	17	33996017	34000333	-	2608	protein_coding	histocompatibility 2, K1, K region [Source:MGI Symbol;Acc:MGI:95904]
ENSMUSG00000036854	Hspb6	298.6	233.224	286.359	142.527	128.908	209.899	7	30552178	30555443	+	2299	protein_coding	heat shock protein, alpha-crystallin-related, B6 [Source:MGI Symbol;Acc:MGI:2685325]
ENSMUSG00000059070	Rpl18	178.973	222.321	197.311	208.706	246.714	239.62	7	45715457	45720836	+	4043	protein_coding	ribosomal protein L18 [Source:MGI Symbol;Acc:MGI:98003]
ENSMUSG00000026817	Ak1	343.365	247.562	297.103	133.526	99.784	170.456	2	32621758	32635058	+	2593	protein_coding	adenylate kinase 1 [Source:MGI Symbol;Acc:MGI:87977]
ENSMUSG00000031791	Tmem38a	326.534	266.373	288.563	137.802	106.18	164.967	8	72572055	72587282	+	2142	protein_coding	transmembrane protein 38A [Source:MGI Symbol;Acc:MGI:1921416]
ENSMUSG00000035557	Krt17	1.98441	1.69371	1.95856	83.6978	579.868	614.091	11	100256217	100261029	-	1551	protein_coding	keratin 17 [Source:MGI Symbol;Acc:MGI:96691]
ENSMUSG00000071644	Eef1g	198.908	213.627	214.652	195.612	238.698	215.988	19	8967041	8978479	+	2600	protein_coding	eukaryotic translation elongation factor 1 gamma [Source:MGI Symbol;Acc:MGI:1914410]
ENSMUSG00000084319	Tpt1-ps3	190.922	193.811	197.18	318.35	184.253	192.201	6	99877816	99878334	-	519	processed_pseudogene	tumor protein, translationally-controlled, pseudogene 3 [Source:MGI Symbol;Acc:MGI:2664997]
ENSMUSG00000016427	Ndufa1	252.71	238.015	210.962	185.64	169.678	217.793	X	37187588	37191163	-	419	protein_coding	NADH dehydrogenase (ubiquinone) 1 alpha subcomplex, 1 [Source:MGI Symbol;Acc:MGI:1929511]
ENSMUSG00000067288	Rps28	196.364	238.747	173.445	211.318	224.288	216.814	17	33819027	33824562	-	1464	protein_coding	ribosomal protein S28 [Source:MGI Symbol;Acc:MGI:1859516]
ENSMUSG00000054091	1810037I17Rik	212.079	281.058	227.057	192.345	163.001	182.183	3	122924203	122926184	+	1160	protein_coding	RIKEN cDNA 1810037I17 gene [Source:MGI Symbol;Acc:MGI:1914954]
ENSMUSG00000064358	mt-Co3	350.704	315.574	205.801	189.034	62.1643	131.379	MT	8607	9390	+	784	protein_coding	mitochondrially encoded cytochrome c oxidase III [Source:MGI Symbol;Acc:MGI:102502]
ENSMUSG00000022312	Eif3h	196.884	222.65	211.556	206.89	216.351	198.245	15	51786558	51865481	-	1253	protein_coding	eukaryotic translation initiation factor 3, subunit H [Source:MGI Symbol;Acc:MGI:1915385]
ENSMUSG00000081344	Gm14303	189.739	189.653	194.536	259.67	193.606	214.34	2	172509521	172509691	-	171	processed_pseudogene	predicted gene 14303 [Source:MGI Symbol;Acc:MGI:3651379]
ENSMUSG00000017778	Cox7c	264.12	239.108	210.115	154.975	149.262	218.82	13	86044816	86046904	-	1131	protein_coding	cytochrome c oxidase subunit VIIc [Source:MGI Symbol;Acc:MGI:103226]
ENSMUSG00000060419	Rps16-ps2	156.353	210.545	167.012	269.069	224.471	205.795	5	129128077	129128517	-	441	processed_pseudogene	ribosomal protein S16, pseudogene 2 [Source:MGI Symbol;Acc:MGI:3704259]
ENSMUSG00000081051	Gm15427	161.008	213.087	176.031	256.265	209.525	214.526	1	95498621	95499151	+	531	processed_pseudogene	predicted pseudogene 15427 [Source:MGI Symbol;Acc:MGI:3642341]
ENSMUSG00000007891	Ctsd	176.736	218.029	196.802	210.984	209.728	217.02	7	142375911	142388038	-	2351	protein_coding	cathepsin D [Source:MGI Symbol;Acc:MGI:88562]
ENSMUSG00000026421	Csrp1	262.604	240.815	258.516	135.801	142.746	185.573	1	135720061	135752232	+	1956	protein_coding	cysteine and glycine-rich protein 1 [Source:MGI Symbol;Acc:MGI:88549]
ENSMUSG00000030218	Mgp	131.304	120.633	117.805	295.254	304.347	244.392	6	136872435	136875823	-	1187	protein_coding	matrix Gla protein [Source:MGI Symbol;Acc:MGI:96976]
ENSMUSG00000071561	BC100530	15.9627	4.71579	15.0657	300.627	433.403	437.59	16	36359382	36367748	-	790	protein_coding	cDNA sequence BC100530 [Source:MGI Symbol;Acc:MGI:3696883]
ENSMUSG00000075307	Klhl41	295.48	267.236	245.528	135.842	92.1708	165.234	2	69670120	69684230	+	2529	protein_coding	kelch-like 41 [Source:MGI Symbol;Acc:MGI:2683854]
ENSMUSG00000020402	Vdac1	248.131	222.132	230.785	164.413	151.571	183.658	11	52360860	52389397	+	2620	protein_coding	voltage-dependent anion channel 1 [Source:MGI Symbol;Acc:MGI:106919]
ENSMUSG00000057609	Lce1a1	191.363	347.413	280.215	160.806	73.2036	136.766	3	92646535	92648307	-	705	protein_coding	late cornified envelope 1A1 [Source:MGI Symbol;Acc:MGI:1914377]
ENSMUSG00000006457	Actn3	279.513	241.915	290.55	178.695	114.199	80.1485	19	4861223	4877909	-	2894	protein_coding	actinin alpha 3 [Source:MGI Symbol;Acc:MGI:99678]
ENSMUSG00000069682	Gm10275	149.246	196.24	174.021	250.612	212.939	200.314	10	29698746	29699380	-	635	transcribed_processed_pseudogene	predicted pseudogene 10275 [Source:MGI Symbol;Acc:MGI:3704354]
ENSMUSG00000038670	Mybpc2	317.748	215.44	234.307	219.009	84.8206	110.337	7	44501699	44524656	-	3611	protein_coding	myosin binding protein C, fast-type [Source:MGI Symbol;Acc:MGI:1336170]
ENSMUSG00000028108	Ecm1	204.361	249.346	259.76	170.8	129.143	158.208	3	95734147	95739569	-	2521	protein_coding	extracellular matrix protein 1 [Source:MGI Symbol;Acc:MGI:103060]
ENSMUSG00000003814	Calr	183.903	165.842	189.045	217.473	210.805	203.811	8	84841850	84846934	-	2880	protein_coding	calreticulin [Source:MGI Symbol;Acc:MGI:88252]
ENSMUSG00000076609	Igkc	7.71384	9.96548	52.607	634.817	161.321	302.746	6	70726435	70726966	+	532	IG_C_gene	immunoglobulin kappa constant [Source:MGI Symbol;Acc:MGI:96495]
ENSMUSG00000011148	Adssl1	276.918	224.141	258.358	123.234	95.7494	190.295	12	112620045	112641360	+	2090	protein_coding	adenylosuccinate synthetase like 1 [Source:MGI Symbol;Acc:MGI:87947]
ENSMUSG00000042157	Sprr2i	0.692829	0.696698	0.403556	203.037	605.789	356.288	3	92407991	92409271	+	617	protein_coding	small proline-rich protein 2I [Source:MGI Symbol;Acc:MGI:1330309]
ENSMUSG00000019362	D8Ertd738e	195.417	201.207	209.058	168.291	182.811	198.447	8	84246238	84249719	-	616	protein_coding	DNA segment, Chr 8, ERATO Doi 738, expressed [Source:MGI Symbol;Acc:MGI:1289231]
ENSMUSG00000073421	H2-Ab1	73.1957	172.756	64.3095	247.68	248.802	345.897	17	34263209	34269418	+	1637	protein_coding	histocompatibility 2, class II antigen A, beta 1 [Source:MGI Symbol;Acc:MGI:103070]
ENSMUSG00000024953	Prdx5	159.978	201.924	176.915	208.724	182.183	213.138	19	6906697	6910106	-	2139	protein_coding	peroxiredoxin 5 [Source:MGI Symbol;Acc:MGI:1859821]
ENSMUSG00000005054	Cstb	94.64	161.505	116.28	232.028	323.296	214.743	10	78425669	78427622	+	603	protein_coding	cystatin B [Source:MGI Symbol;Acc:MGI:109514]
ENSMUSG00000062070	Pgk1	186.173	206.29	181.863	160.758	190.624	216.677	X	106187100	106203699	+	2244	protein_coding	phosphoglycerate kinase 1 [Source:MGI Symbol;Acc:MGI:97555]
ENSMUSG00000058558	Rpl5	184.087	212.823	185.45	187.324	189.193	181.592	5	107900502	107909005	+	3920	protein_coding	ribosomal protein L5 [Source:MGI Symbol;Acc:MGI:102854]
ENSMUSG00000061983	Rps12	181.134	187.186	181.752	198.264	223.943	164.833	10	23785183	23787275	-	2027	protein_coding	ribosomal protein S12 [Source:MGI Symbol;Acc:MGI:98105]
ENSMUSG00000048076	Arf1	169.967	188.718	181.722	193.182	209.599	193.118	11	59211412	59228270	-	2089	protein_coding	ADP-ribosylation factor 1 [Source:MGI Symbol;Acc:MGI:99431]
ENSMUSG00000038900	Rpl12	161.557	207.391	175.251	184.198	209.899	194.626	2	32961559	32965345	+	3598	protein_coding	ribosomal protein L12 [Source:MGI Symbol;Acc:MGI:98002]
ENSMUSG00000100862	Gm10925	256.422	143.358	159.312	286.747	99.5958	176.122	1	24613974	24614651	-	678	unprocessed_pseudogene	predicted gene 10925 [Source:MGI Symbol;Acc:MGI:3809095]
ENSMUSG00000103243	Lce1d	193.373	349.836	254.429	149.975	57.9664	112.787	3	92685499	92687210	-	678	protein_coding	late cornified envelope 1D [Source:MGI Symbol;Acc:MGI:1916861]
ENSMUSG00000046364	Rpl27a	168.725	202.672	167.133	177.635	206.393	194.482	7	109519147	109522367	+	2774	protein_coding	ribosomal protein L27A [Source:MGI Symbol;Acc:MGI:1347076]
ENSMUSG00000023175	Bsg	179.191	189.786	179.759	174.581	194.402	198.814	10	79704491	79711969	+	1814	protein_coding	basigin [Source:MGI Symbol;Acc:MGI:88208]
ENSMUSG00000068890	Lce1a2	190.66	363.463	270.307	130.805	50.3766	105.028	3	92668613	92670315	-	715	protein_coding	late cornified envelope 1A2 [Source:MGI Symbol;Acc:MGI:1920972]
ENSMUSG00000079435	Rpl36a	164.094	203.748	161.252	193.058	186.109	199.996	X	134585654	134588062	+	1655	protein_coding	ribosomal protein L36A [Source:MGI Symbol;Acc:MGI:1201789]
ENSMUSG00000009927	Rps25	160.426	200.759	164.738	206.153	188.108	185.375	9	44407139	44410427	+	2691	protein_coding	ribosomal protein S25 [Source:MGI Symbol;Acc:MGI:1922867]
ENSMUSG00000058600	Rpl30	163.389	188.693	173.125	196.835	189.01	188.584	15	34440505	34443640	-	3020	protein_coding	ribosomal protein L30 [Source:MGI Symbol;Acc:MGI:98037]
ENSMUSG00000016319	Slc25a5	132.034	168.968	145.191	194.462	246.32	204.607	X	36795651	36798807	+	1646	protein_coding	solute carrier family 25 (mitochondrial carrier, adenine nucleotide translocator), member 5 [Source:MGI Symbol;Acc:MGI:1353496]
ENSMUSG00000040385	Ppp1ca	156.173	168.225	166.08	186.74	225.767	187.38	19	4192158	4195419	+	1379	protein_coding	protein phosphatase 1, catalytic subunit, alpha isoform [Source:MGI Symbol;Acc:MGI:103016]
ENSMUSG00000018585	Atox1	142.149	188.137	166.518	184.693	219.681	186.078	11	55446641	55461239	-	541	protein_coding	antioxidant 1 copper chaperone [Source:MGI Symbol;Acc:MGI:1333855]
ENSMUSG00000036752	Tubb4b	203.972	189.723	239.549	148.694	155.727	142.883	2	25222160	25224702	-	2088	protein_coding	tubulin, beta 4B class IVB [Source:MGI Symbol;Acc:MGI:1915472]
ENSMUSG00000056612	Ppp1r14b	142.941	156.956	149.884	172.733	266.68	190.032	19	6975048	6977324	+	919	protein_coding	protein phosphatase 1, regulatory (inhibitor) subunit 14B [Source:MGI Symbol;Acc:MGI:107682]
ENSMUSG00000052305	Hbb-bs	87.2205	185.142	98.236	351.84	162.334	194.15	7	103826534	103828096	-	768	protein_coding	hemoglobin, beta adult s chain [Source:MGI Symbol;Acc:MGI:5474852]
ENSMUSG00000050708	Ftl1	127.828	163.141	144.751	184.804	236.9	212.043	7	45457944	45459884	-	1340	protein_coding	ferritin light polypeptide 1 [Source:MGI Symbol;Acc:MGI:95589]
ENSMUSG00000024049	Myom1	252.951	207.125	231.241	127.247	99.5735	150.828	17	71019521	71126856	+	5672	protein_coding	myomesin 1 [Source:MGI Symbol;Acc:MGI:1341430]
ENSMUSG00000030470	Csrp3	281.196	219.697	233.855	108.314	78.4391	142.509	7	48830398	48848033	-	2671	protein_coding	cysteine and glycine-rich protein 3 [Source:MGI Symbol;Acc:MGI:1330824]
ENSMUSG00000030057	Cnbp	179.973	199.482	168.604	172.603	180.191	161.717	6	87842615	87851106	-	3036	protein_coding	cellular nucleic acid binding protein [Source:MGI Symbol;Acc:MGI:88431]
ENSMUSG00000041959	S100a10	180.443	193.336	167.681	168.521	174.895	171.927	3	93555080	93564643	+	1212	protein_coding	S100 calcium binding protein A10 (calpactin) [Source:MGI Symbol;Acc:MGI:1339468]
ENSMUSG00000007122	Casq1	281.441	215.751	255.707	97.524	83.7517	121.492	1	172209894	172219868	-	1951	protein_coding	calsequestrin 1 [Source:MGI Symbol;Acc:MGI:1309468]
ENSMUSG00000021506	Pitx1	102.443	147.585	143.153	163.729	275.091	206.933	13	55825051	55836192	-	2656	protein_coding	paired-like homeodomain transcription factor 1 [Source:MGI Symbol;Acc:MGI:107374]
ENSMUSG00000078664	Sprr2a1	15.4164	39.5715	18.8383	561.516	155.094	231.33	3	92215799	92221911	+	3003	protein_coding	small proline-rich protein 2A1 [Source:MGI Symbol;Acc:MGI:1330350]
ENSMUSG00000050856	Atp5k	253.085	191.825	175.589	121.762	113.816	165.316	5	108433244	108434448	-	616	protein_coding	ATP synthase, H+ transporting, mitochondrial F1F0 complex, subunit E [Source:MGI Symbol;Acc:MGI:106636]
ENSMUSG00000021520	Uqcrb	216.519	178.673	170.203	161.782	133.984	159.278	13	66900617	66905378	-	876	protein_coding	ubiquinol-cytochrome c reductase binding protein [Source:MGI Symbol;Acc:MGI:1914780]
ENSMUSG00000032231	Anxa2	145.177	171.86	145.285	182.951	207.606	166.344	9	69453620	69491795	+	3731	protein_coding	annexin A2 [Source:MGI Symbol;Acc:MGI:88246]
ENSMUSG00000026984	Il1f6	58.9654	128.737	75.4596	224.769	310.818	214.713	2	24215418	24225702	+	883	protein_coding	interleukin 1 family, member 6 [Source:MGI Symbol;Acc:MGI:1859324]
ENSMUSG00000056201	Cfl1	110.065	129.714	112.65	187.075	253.849	217.186	19	5490455	5495201	+	2354	protein_coding	cofilin 1, non-muscle [Source:MGI Symbol;Acc:MGI:101757]
ENSMUSG00000068240	Gm11808	117.641	167.643	145.543	214.438	179.644	180.153	4	3973092	3973595	-	504	protein_coding	predicted gene 11808 [Source:MGI Symbol;Acc:MGI:3649356]
ENSMUSG00000095597	Gm6472	138.683	173.662	155.516	192.229	167.689	175.813	X	152909505	152910155	-	651	transcribed_processed_pseudogene	predicted pseudogene 6472 [Source:MGI Symbol;Acc:MGI:3648396]
ENSMUSG00000075602	Ly6a	103.091	134.012	81.7445	243.492	183.469	251.733	15	74994877	74998031	-	1205	protein_coding	lymphocyte antigen 6 complex, locus A [Source:MGI Symbol;Acc:MGI:107527]
ENSMUSG00000020267	Hint1	166.137	161.801	152.366	167.985	176.282	169.323	11	54866383	54870501	+	872	protein_coding	histidine triad nucleotide binding protein 1 [Source:MGI Symbol;Acc:MGI:1321133]
ENSMUSG00000024471	Myot	255.789	178.92	212.293	124.28	99.5985	122.424	18	44334074	44355724	+	2209	protein_coding	myotilin [Source:MGI Symbol;Acc:MGI:1889800]
ENSMUSG00000010376	Nedd8	157.048	176.263	161.764	150.171	164.505	176.875	14	55662265	55671906	-	604	protein_coding	neural precursor cell expressed, developmentally down-regulated gene 8 [Source:MGI Symbol;Acc:MGI:97301]
ENSMUSG00000052146	Rps10	153.004	186.981	161.223	143.644	181.761	159.827	17	27630422	27636629	-	1937	protein_coding	ribosomal protein S10 [Source:MGI Symbol;Acc:MGI:1914347]
ENSMUSG00000003380	Rabac1	161.447	171.857	160.219	163.119	141.686	187.932	7	24969752	24972754	-	1523	protein_coding	Rab acceptor 1 (prenylated) [Source:MGI Symbol;Acc:MGI:1201692]
ENSMUSG00000041548	Hspb8	227.833	172.876	203.256	126.541	109.966	144.473	5	116408491	116422864	-	1950	protein_coding	heat shock protein 8 [Source:MGI Symbol;Acc:MGI:2135756]
ENSMUSG00000020372	Rack1	145.153	171.503	155.623	164.337	180.438	167.699	11	48800332	48806434	+	5119	protein_coding	receptor for activated C kinase 1 [Source:MGI Symbol;Acc:MGI:101849]
ENSMUSG00000014294	Ndufa2	203.35	197.48	174.296	136.91	111.526	159.902	18	36742332	36744557	-	572	protein_coding	NADH dehydrogenase (ubiquinone) 1 alpha subcomplex, 2 [Source:MGI Symbol;Acc:MGI:1343103]
ENSMUSG00000031059	Ndufb11	202.392	177.847	172.98	132.43	119.278	166.463	X	20615326	20617619	-	908	protein_coding	NADH dehydrogenase (ubiquinone) 1 beta subcomplex, 11 [Source:MGI Symbol;Acc:MGI:1349919]
ENSMUSG00000042092	Lce1c	157.882	301.484	236.888	125.585	49.7504	94.0004	3	92679247	92680918	+	724	protein_coding	late cornified envelope 1C [Source:MGI Symbol;Acc:MGI:1920969]
ENSMUSG00000025508	Rplp2	151.989	156.865	145.166	152.353	185.084	164.369	7	141447370	141451585	+	2072	protein_coding	ribosomal protein, large P2 [Source:MGI Symbol;Acc:MGI:1914436]
ENSMUSG00000018293	Pfn1	129.593	128.254	125.853	161.088	217.215	191.314	11	70651850	70654644	-	2405	protein_coding	profilin 1 [Source:MGI Symbol;Acc:MGI:97549]
ENSMUSG00000025967	Eef1b2	146.172	177.393	152.012	167.097	162.979	145.907	1	63176825	63180486	+	2532	protein_coding	eukaryotic translation elongation factor 1 beta 2 [Source:MGI Symbol;Acc:MGI:1929520]
ENSMUSG00000001025	S100a6	113.139	141.156	105.098	193.088	243.235	154.718	3	90612882	90624181	+	1367	protein_coding	S100 calcium binding protein A6 (calcyclin) [Source:MGI Symbol;Acc:MGI:1339467]
ENSMUSG00000047215	Rpl9	148.888	172.199	157.058	151.62	164.563	154.529	5	65388364	65391444	-	3081	protein_coding	ribosomal protein L9 [Source:MGI Symbol;Acc:MGI:1298373]
ENSMUSG00000022551	Cyc1	180.37	155.208	160.115	126.671	149.941	171.1	15	76343523	76345934	+	1194	protein_coding	cytochrome c-1 [Source:MGI Symbol;Acc:MGI:1913695]
ENSMUSG00000039775	Defb3	0.155446	0.173682	0	133.407	396.071	413.321	8	19293360	19295291	+	275	protein_coding	defensin beta 3 [Source:MGI Symbol;Acc:MGI:1351612]
ENSMUSG00000043472	Lce3d	53.2821	142.217	57.3041	208.62	271.128	203.84	3	92957390	92958505	+	491	protein_coding	late cornified envelope 3D [Source:MGI Symbol;Acc:MGI:3642919]
ENSMUSG00000038615	Nfe2l1	205.441	159.799	186.199	126.206	116.408	142.013	11	96817414	96829968	-	5441	protein_coding	nuclear factor, erythroid derived 2,-like 1 [Source:MGI Symbol;Acc:MGI:99421]
ENSMUSG00000036887	C1qa	97.5383	133.597	88.2014	200.674	188.396	226.793	4	136895917	136898803	-	1040	protein_coding	complement component 1, q subcomponent, alpha polypeptide [Source:MGI Symbol;Acc:MGI:88223]
ENSMUSG00000021660	Btf3	132.299	166.413	139.259	174.402	172.543	149.667	13	98309896	98317006	-	1739	protein_coding	basic transcription factor 3 [Source:MGI Symbol;Acc:MGI:1202875]
ENSMUSG00000012405	Rpl15	134.569	166.811	143.939	148.778	172.69	159.241	14	18267823	18271391	-	2473	protein_coding	ribosomal protein L15 [Source:MGI Symbol;Acc:MGI:1913730]
ENSMUSG00000060147	Serpinb6a	236.901	195.032	201.552	115.956	82.4581	91.5779	13	33917918	34002794	-	5409	protein_coding	serine (or cysteine) peptidase inhibitor, clade B, member 6a [Source:MGI Symbol;Acc:MGI:103123]
ENSMUSG00000026385	Dbi	166.902	188.867	157.766	149.154	120.044	138.775	1	120113280	120121078	-	1422	protein_coding	diazepam binding inhibitor [Source:MGI Symbol;Acc:MGI:94865]
ENSMUSG00000022477	Aco2	188.421	169.083	176.957	115.653	112.627	157.055	15	81872309	81915133	+	3892	protein_coding	aconitase 2, mitochondrial [Source:MGI Symbol;Acc:MGI:87880]
ENSMUSG00000064357	mt-Atp6	243.052	116.916	144.57	179.358	77.2292	155.959	MT	7927	8607	+	681	protein_coding	mitochondrially encoded ATP synthase 6 [Source:MGI Symbol;Acc:MGI:99927]
ENSMUSG00000008601	Rab25	119.197	186.454	157.225	146.227	172.851	131.647	3	88542029	88548300	-	1673	protein_coding	RAB25, member RAS oncogene family [Source:MGI Symbol;Acc:MGI:1858203]
ENSMUSG00000022450	Ndufa6	181.295	176.465	164.247	122.757	108.641	158.047	15	82350139	82354291	-	560	protein_coding	NADH dehydrogenase (ubiquinone) 1 alpha subcomplex, 6 (B14) [Source:MGI Symbol;Acc:MGI:1914380]
ENSMUSG00000026202	Tuba4a	161.299	143.197	165.099	133.285	173.84	130.915	1	75214228	75219865	-	3701	protein_coding	tubulin, alpha 4A [Source:MGI Symbol;Acc:MGI:1095410]
ENSMUSG00000038393	Txnip	156.207	222.295	242.153	96.9438	73.4969	110.68	3	96557957	96561883	+	3123	protein_coding	thioredoxin interacting protein [Source:MGI Symbol;Acc:MGI:1889549]
ENSMUSG00000005716	Pvalb	415.69	222.57	210.868	17.7904	17.7732	17.0041	15	78191114	78206400	-	1041	protein_coding	parvalbumin [Source:MGI Symbol;Acc:MGI:97821]
ENSMUSG00000019929	Dcn	160.058	185.814	153.747	157.316	98.4568	145.711	10	97479609	97518143	+	5838	protein_coding	decorin [Source:MGI Symbol;Acc:MGI:94872]
ENSMUSG00000090356	Teddm3	135.293	189.95	170.744	156.003	131.973	113.316	16	21152655	21154000	-	1346	protein_coding	transmembrane epididymal family member 3 [Source:MGI Symbol;Acc:MGI:1913811]
ENSMUSG00000069919	Hba-a1	66.3324	142.64	77.2127	332.395	131.207	146.135	11	32283511	32284465	+	812	protein_coding	hemoglobin alpha, adult chain 1 [Source:MGI Symbol;Acc:MGI:96015]
ENSMUSG00000036731	Cysrt1	159.227	238.741	199.083	113.42	85.349	95.8893	2	25238818	25242452	-	1330	protein_coding	cysteine rich tail 1 [Source:MGI Symbol;Acc:MGI:1915109]
ENSMUSG00000045799	Gm9800	117.937	134.901	145.098	147.245	176.917	160.651	14	8800000	8800335	-	336	processed_pseudogene	predicted gene 9800 [Source:MGI Symbol;Acc:MGI:3710580]
ENSMUSG00000054452	Aes	187.197	164.289	179.315	106.415	108.442	133.458	10	81559488	81566362	+	3334	protein_coding	amino-terminal enhancer of split [Source:MGI Symbol;Acc:MGI:95806]
ENSMUSG00000023046	Igfbp6	181.908	160.812	153.606	146.6	114.403	121.767	15	102144362	102149511	+	1112	protein_coding	insulin-like growth factor binding protein 6 [Source:MGI Symbol;Acc:MGI:96441]
ENSMUSG00000026547	Tagln2	85.3513	72.5384	77.2815	168.416	267.111	206.09	1	172500047	172507380	+	2082	protein_coding	transgelin 2 [Source:MGI Symbol;Acc:MGI:1312985]
ENSMUSG00000033020	Polr2f	129.502	140.385	146.645	133.828	167.648	154.021	15	79141351	79151774	+	543	protein_coding	polymerase (RNA) II (DNA directed) polypeptide F [Source:MGI Symbol;Acc:MGI:1349393]
ENSMUSG00000074218	Cox7a1	254.408	209.351	205.525	59.9196	39.1839	101.439	7	30184144	30186078	+	535	protein_coding	cytochrome c oxidase subunit VIIa 1 [Source:MGI Symbol;Acc:MGI:1316714]
ENSMUSG00000068893	Sprr2a2	5.42056	19.6795	8.84742	559.611	47.6784	228.131	3	92215920	92256724	+	2910	protein_coding	small proline-rich protein 2A2 [Source:MGI Symbol;Acc:MGI:3845026]
ENSMUSG00000043430	Psapl1	169.564	191.762	228.14	104.855	90.1954	77.2031	5	36204021	36206568	+	2548	protein_coding	prosaposin-like 1 [Source:MGI Symbol;Acc:MGI:1924193]
ENSMUSG00000080921	Rpl38-ps2	113.592	141.269	139.109	179.692	135.785	150.762	6	140746960	140747172	-	213	processed_pseudogene	ribosomal protein L38, pseudogene 2 [Source:MGI Symbol;Acc:MGI:3646625]
ENSMUSG00000034566	Atp5h	162.937	157.698	140.694	119.553	119.46	158.072	11	115415689	115419962	-	1465	protein_coding	ATP synthase, H+ transporting, mitochondrial F0 complex, subunit D [Source:MGI Symbol;Acc:MGI:1918929]
ENSMUSG00000026864	Hspa5	150.733	110.941	148.372	160.844	133.346	145.347	2	34771970	34777547	+	4229	protein_coding	heat shock protein 5 [Source:MGI Symbol;Acc:MGI:95835]
ENSMUSG00000018593	Sparc	150.339	121.6	124.497	185.157	127.015	140.872	11	55394500	55423183	-	3788	protein_coding	secreted acidic cysteine rich glycoprotein [Source:MGI Symbol;Acc:MGI:98373]
ENSMUSG00000016252	Atp5e	175.713	164.231	152.714	117.871	105.925	129.149	2	174461072	174464105	-	1756	protein_coding	ATP synthase, H+ transporting, mitochondrial F1 complex, epsilon subunit [Source:MGI Symbol;Acc:MGI:1855697]
ENSMUSG00000039457	Ppl	160.407	224.675	205.733	96.2964	76.8527	75.8023	16	5086291	5132481	-	6277	protein_coding	periplakin [Source:MGI Symbol;Acc:MGI:1194898]
ENSMUSG00000022892	App	119.756	130.965	132.999	150.681	153.566	146.934	16	84954440	85173707	-	3128	protein_coding	amyloid beta (A4) precursor protein [Source:MGI Symbol;Acc:MGI:88059]
ENSMUSG00000023067	Cdkn1a	145.953	168.146	163.711	132.344	130.602	93.5301	17	29090979	29100722	+	2223	protein_coding	cyclin-dependent kinase inhibitor 1A (P21) [Source:MGI Symbol;Acc:MGI:104556]
ENSMUSG00000084106	Gm6136	111.738	136.587	121.283	146.933	161.519	150.567	1	86908793	86909683	-	891	processed_pseudogene	predicted pseudogene 6136 [Source:MGI Symbol;Acc:MGI:3646897]
ENSMUSG00000027923	Lce1b	134.651	281.481	188.497	104.069	38.4246	81.369	3	92655650	92656926	-	647	protein_coding	late cornified envelope 1B [Source:MGI Symbol;Acc:MGI:1915970]
ENSMUSG00000102070	Gm28661	148.267	121.265	130.822	228.374	75.3617	122.871	1	24614885	24615565	-	681	unprocessed_pseudogene	predicted gene 28661 [Source:MGI Symbol;Acc:MGI:5579367]
ENSMUSG00000061518	Cox5b	154.987	150.212	135.15	108.845	122.306	154.095	1	36691484	36693681	+	1552	protein_coding	cytochrome c oxidase subunit Vb [Source:MGI Symbol;Acc:MGI:88475]
ENSMUSG00000020849	Ywhae	149.15	138.433	142.861	125.21	137.45	124.269	11	75732869	75765845	+	2568	protein_coding	tyrosine 3-monooxygenase/tryptophan 5-monooxygenase activation protein, epsilon polypeptide [Source:MGI Symbol;Acc:MGI:894689]
ENSMUSG00000067719	Gm10221	162.69	121.029	128.929	131.999	118.957	151.504	5	24581554	24581862	-	309	processed_pseudogene	predicted gene 10221 [Source:MGI Symbol;Acc:MGI:3708709]
ENSMUSG00000071655	Ubxn1	128.163	136.937	131.165	134.225	135.902	147.413	19	8871559	8875663	+	1068	protein_coding	UBX domain protein 1 [Source:MGI Symbol;Acc:MGI:1289301]
ENSMUSG00000027248	Pdia3	112.377	106.982	119.397	164.481	160.333	147.52	2	121413775	121438687	+	3139	protein_coding	protein disulfide isomerase associated 3 [Source:MGI Symbol;Acc:MGI:95834]
ENSMUSG00000055561	Spink5	97.5198	131.12	115.438	129.041	206.056	125.899	18	43963235	44022501	+	4785	protein_coding	serine peptidase inhibitor, Kazal type 5 [Source:MGI Symbol;Acc:MGI:1919682]
ENSMUSG00000081485	Gm12338	152.288	130.601	126.831	142.39	103.415	147.945	11	75599763	75599954	-	192	processed_pseudogene	predicted gene 12338 [Source:MGI Symbol;Acc:MGI:3650622]
ENSMUSG00000070493	Chchd2	151.434	143.245	135.811	111.86	118.336	134.128	5	129881156	129887470	-	2269	protein_coding	coiled-coil-helix-coiled-coil-helix domain containing 2 [Source:MGI Symbol;Acc:MGI:1261428]
ENSMUSG00000032643	Fhl3	199.209	177.91	155.788	88.0588	71.1526	102.133	4	124700701	124708611	+	1683	protein_coding	four and a half LIM domains 3 [Source:MGI Symbol;Acc:MGI:1341092]
ENSMUSG00000106037	Gm4332	111.44	142.183	118.452	144.901	128.645	148.544	3	119709516	119709861	+	346	processed_pseudogene	predicted gene 4332 [Source:MGI Symbol;Acc:MGI:3782515]
ENSMUSG00000020708	Psmc5	129.255	130.953	130.856	133.708	145.292	123.158	11	106256154	106263120	+	1394	protein_coding	protease (prosome, macropain) 26S subunit, ATPase 5 [Source:MGI Symbol;Acc:MGI:105047]
ENSMUSG00000006304	Arpc2	111.169	133.514	125.342	130.658	152.676	137.222	1	74236084	74268209	+	2033	protein_coding	actin related protein 2/3 complex, subunit 2 [Source:MGI Symbol;Acc:MGI:1923959]
ENSMUSG00000004897	Hdgf	132.632	135.906	140.383	111.488	141.993	127.27	3	87906321	87916132	+	2873	protein_coding	hepatoma-derived growth factor [Source:MGI Symbol;Acc:MGI:1194494]
ENSMUSG00000035530	Eif1	166.548	144.016	144.412	111.414	109.111	113.317	11	100319885	100322096	+	2098	protein_coding	eukaryotic translation initiation factor 1 [Source:MGI Symbol;Acc:MGI:105125]
ENSMUSG00000028435	Aqp3	56.2098	107.459	82.5805	176.163	226.699	137.976	4	41092722	41098183	-	1829	protein_coding	aquaporin 3 [Source:MGI Symbol;Acc:MGI:1333777]
ENSMUSG00000027712	Anxa5	128.603	156.78	139.504	137.024	110.652	113.7	3	36448923	36475894	-	1777	protein_coding	annexin A5 [Source:MGI Symbol;Acc:MGI:106008]
ENSMUSG00000036438	Calm2	154.614	143.776	145.9	119.089	94.8004	128.073	17	87433412	87446935	-	1467	protein_coding	calmodulin 2 [Source:MGI Symbol;Acc:MGI:103250]
ENSMUSG00000030342	Cd9	104.757	133.917	115.263	142.1	164.197	124.624	6	125460266	125494791	-	2044	protein_coding	CD9 antigen [Source:MGI Symbol;Acc:MGI:88348]
ENSMUSG00000026895	Ndufa8	147.854	133.247	135.4	110.877	123.12	133.658	2	36036326	36049406	-	861	protein_coding	NADH dehydrogenase (ubiquinone) 1 alpha subcomplex, 8 [Source:MGI Symbol;Acc:MGI:1915625]
ENSMUSG00000059325	Hopx	132.811	183.3	171.799	87.928	94.1988	111.626	5	77086988	77115121	-	1516	protein_coding	HOP homeobox [Source:MGI Symbol;Acc:MGI:1916782]
ENSMUSG00000031231	Cox7b	142.926	135.143	126.179	116.848	113.374	144.781	X	106015700	106022450	+	1214	protein_coding	cytochrome c oxidase subunit VIIb [Source:MGI Symbol;Acc:MGI:1913392]
ENSMUSG00000016559	H3f3b	97.288	118.299	102.894	149.665	176.448	134.005	11	116021912	116027962	-	2976	protein_coding	H3 histone, family 3B [Source:MGI Symbol;Acc:MGI:1101768]
ENSMUSG00000041736	Tspo	104.245	128.609	92.9167	145.836	136.5	168.899	15	83563592	83574203	+	1051	protein_coding	translocator protein [Source:MGI Symbol;Acc:MGI:88222]
ENSMUSG00000025781	Atp5c1	163.843	143.463	143.602	106.701	94.0677	124.274	2	10056016	10080510	-	1908	protein_coding	ATP synthase, H+ transporting, mitochondrial F1 complex, gamma polypeptide 1 [Source:MGI Symbol;Acc:MGI:1261437]
ENSMUSG00000003072	Atp5d	143.94	142.074	128.346	106.075	123.647	131.582	10	80138632	80145818	+	1928	protein_coding	ATP synthase, H+ transporting, mitochondrial F1 complex, delta subunit [Source:MGI Symbol;Acc:MGI:1913293]
ENSMUSG00000029309	Sparcl1	152.724	149.337	155.992	102.693	84.2415	130.027	5	104079111	104113733	-	2937	protein_coding	SPARC-like 1 [Source:MGI Symbol;Acc:MGI:108110]
ENSMUSG00000090841	Myl6	134.399	138.042	130.896	122.35	114.5	134.621	10	128490860	128494145	-	3187	protein_coding	myosin, light polypeptide 6, alkali, smooth muscle and non-muscle [Source:MGI Symbol;Acc:MGI:109318]
ENSMUSG00000101111	Gm28437	156.741	169.761	109.519	192.373	56.2184	90.0026	1	24613189	24613971	-	783	unprocessed_pseudogene	predicted gene 28437 [Source:MGI Symbol;Acc:MGI:5579143]
ENSMUSG00000041801	Phlda3	94.6807	105.819	93.6243	130.842	187.438	161.685	1	135766119	135769136	+	1559	protein_coding	pleckstrin homology like domain, family A, member 3 [Source:MGI Symbol;Acc:MGI:1351485]
ENSMUSG00000062006	Rpl34	110.581	136.294	111.788	140.693	130.88	139.464	3	130726831	130730398	-	2643	protein_coding	ribosomal protein L34 [Source:MGI Symbol;Acc:MGI:1915686]
ENSMUSG00000044147	Arf6	87.1113	127.533	120.829	130.56	161.369	141.513	12	69372150	69373783	+	1534	protein_coding	ADP-ribosylation factor 6 [Source:MGI Symbol;Acc:MGI:99435]
ENSMUSG00000031708	Tecr	149.099	145.664	158.147	98.2324	110.472	107.176	8	83571698	83607971	-	2191	protein_coding	trans-2,3-enoyl-CoA reductase [Source:MGI Symbol;Acc:MGI:1915408]
ENSMUSG00000040488	Ltbp4	140.717	136.821	142.878	113.065	99.3393	134.52	7	27305136	27337692	-	6463	protein_coding	latent transforming growth factor beta binding protein 4 [Source:MGI Symbol;Acc:MGI:1321395]
ENSMUSG00000063882	Uqcrh	153.815	147.264	136.554	106.869	93.7555	128.654	4	116066965	116075071	-	1237	protein_coding	ubiquinol-cytochrome c reductase hinge protein [Source:MGI Symbol;Acc:MGI:1913826]
ENSMUSG00000023150	Ivns1abp	194.704	158.614	161.5	78.3323	74.9759	97.8453	1	151344477	151364422	+	5435	protein_coding	influenza virus NS1A binding protein [Source:MGI Symbol;Acc:MGI:2152389]
ENSMUSG00000023224	Serping1	116.328	128.209	113.477	159.785	108.48	139.389	2	84765387	84775444	-	2325	protein_coding	serine (or cysteine) peptidase inhibitor, clade G, member 1 [Source:MGI Symbol;Acc:MGI:894696]
ENSMUSG00000026043	Col3a1	124.415	118.959	103.58	200.592	110.004	105.53	1	45311538	45349706	+	9816	protein_coding	collagen, type III, alpha 1 [Source:MGI Symbol;Acc:MGI:88453]
ENSMUSG00000022193	Psmb5	113.617	121.901	107.888	128.69	151.71	135.375	14	54614120	54617995	-	871	protein_coding	proteasome (prosome, macropain) subunit, beta type 5 [Source:MGI Symbol;Acc:MGI:1194513]
ENSMUSG00000032454	Rbp2	117.622	143.139	133.763	137.785	103.371	120.101	9	98486115	98509781	+	962	protein_coding	retinol binding protein 2, cellular [Source:MGI Symbol;Acc:MGI:97877]
ENSMUSG00000057036	Gm7536	98.974	122.849	103.635	187.999	128.524	113.225	3	24333068	24333511	+	444	processed_pseudogene	predicted gene 7536 [Source:MGI Symbol;Acc:MGI:3645137]
ENSMUSG00000059606	Rnase2b	8.56077	6.67039	8.92311	261.49	196.257	273.058	14	51162260	51163018	+	759	protein_coding	ribonuclease, RNase A family, 2B (liver, eosinophil-derived neurotoxin) [Source:MGI Symbol;Acc:MGI:1858598]
ENSMUSG00000025290	Rps24	119.182	139.027	117.118	131.241	121.958	126.255	14	24487125	24496959	+	6256	protein_coding	ribosomal protein S24 [Source:MGI Symbol;Acc:MGI:98147]
ENSMUSG00000051695	Pcbp1	121.282	119.25	125.395	107.394	141.59	137.969	6	86524492	86526321	-	1830	protein_coding	poly(rC) binding protein 1 [Source:MGI Symbol;Acc:MGI:1345635]
ENSMUSG00000078126	Rpl23a-ps3	120.591	128.42	120.234	151.587	112.138	117.171	14	34170655	34171168	+	514	protein_coding	ribosomal protein L23A, pseudogene 3 [Source:MGI Symbol;Acc:MGI:3781353]
ENSMUSG00000019194	Scn1b	202.953	150.353	171.657	80.3623	53.2058	87.3331	7	31116524	31127003	-	1859	protein_coding	sodium channel, voltage-gated, type I, beta [Source:MGI Symbol;Acc:MGI:98247]
ENSMUSG00000032959	Pebp1	138.881	142.207	124.469	104.601	110.404	123.961	5	117282654	117287625	-	1768	protein_coding	phosphatidylethanolamine binding protein 1 [Source:MGI Symbol;Acc:MGI:1344408]
ENSMUSG00000033161	Atp1a1	88.8639	88.2477	84.8913	139.244	198.188	145.055	3	101576219	101604684	-	4568	protein_coding	ATPase, Na+/K+ transporting, alpha 1 polypeptide [Source:MGI Symbol;Acc:MGI:88105]
ENSMUSG00000028756	Pink1	188.358	136.301	164.114	92.1819	67.3762	94.4724	4	138313409	138326307	-	2673	protein_coding	PTEN induced putative kinase 1 [Source:MGI Symbol;Acc:MGI:1916193]
ENSMUSG00000050463	Krt78	131.467	211.482	182.968	96.4977	46.3285	73.1121	15	101946004	101954287	-	3434	protein_coding	keratin 78 [Source:MGI Symbol;Acc:MGI:1917529]
ENSMUSG00000028234	Rps20	110.18	137.083	110.729	121.542	127.014	131.729	4	3831334	3835665	-	4080	protein_coding	ribosomal protein S20 [Source:MGI Symbol;Acc:MGI:1914677]
ENSMUSG00000021798	Ldb3	193.884	141.009	175.264	79.5335	58.0109	89.8358	14	34526699	34588681	-	6016	protein_coding	LIM domain binding 3 [Source:MGI Symbol;Acc:MGI:1344412]
ENSMUSG00000032013	Trim29	78.2084	103.488	98.723	131.561	207.968	117.431	9	43310848	43336115	+	3473	protein_coding	tripartite motif-containing 29 [Source:MGI Symbol;Acc:MGI:1919419]
ENSMUSG00000031447	Lamp1	119.278	124.343	120.988	126.35	124.622	118.738	8	13159161	13175338	+	2675	protein_coding	lysosomal-associated membrane protein 1 [Source:MGI Symbol;Acc:MGI:96745]
ENSMUSG00000044894	Uqcrq	134.756	125.158	113.876	110.562	114.379	133.89	11	53427922	53430831	-	1831	protein_coding	ubiquinol-cytochrome c reductase, complex III subunit VII [Source:MGI Symbol;Acc:MGI:107807]
ENSMUSG00000070436	Serpinh1	165.111	98.4185	151.333	107.701	97.1115	112.829	7	99345376	99353239	-	2443	protein_coding	serine (or cysteine) peptidase inhibitor, clade H, member 1 [Source:MGI Symbol;Acc:MGI:88283]
ENSMUSG00000050092	Sprr2b	0.327149	0.548294	0.381113	105.4	302.554	322.417	3	92316620	92318085	+	784	protein_coding	small proline-rich protein 2B [Source:MGI Symbol;Acc:MGI:1330352]
ENSMUSG00000027602	Map1lc3a	156.946	141.306	146.866	89.3845	82.1875	114.899	2	155276297	155278073	+	1181	protein_coding	microtubule-associated protein 1 light chain 3 alpha [Source:MGI Symbol;Acc:MGI:1915661]
ENSMUSG00000051397	Tacstd2	97.2475	139.626	135.189	123.466	124.964	108.674	6	67534062	67535796	-	1735	protein_coding	tumor-associated calcium signal transducer 2 [Source:MGI Symbol;Acc:MGI:1861606]
ENSMUSG00000021606	Ndufs6	147.998	135.841	126.993	101.89	98.1293	111.268	13	73319838	73328542	-	898	protein_coding	NADH dehydrogenase (ubiquinone) Fe-S protein 6 [Source:MGI Symbol;Acc:MGI:107932]
ENSMUSG00000023004	Tuba1b	114.495	120.871	133.408	113.306	118.062	121.574	15	98931425	98934565	-	1875	protein_coding	tubulin, alpha 1B [Source:MGI Symbol;Acc:MGI:107804]
ENSMUSG00000032807	Alox12b	122.369	151.579	168.878	84.7978	110.146	82.2894	11	69156989	69169792	+	2431	protein_coding	arachidonate 12-lipoxygenase, 12R type [Source:MGI Symbol;Acc:MGI:1274782]
ENSMUSG00000018567	Gabarap	117.162	124.871	118.016	123.867	109.724	126.306	11	69991143	69994951	+	1844	protein_coding	gamma-aminobutyric acid receptor associated protein [Source:MGI Symbol;Acc:MGI:1861742]
ENSMUSG00000059430	Actg2	205.034	155.251	180.581	65.4201	53.7505	55.5603	6	83512905	83536265	-	1557	protein_coding	actin, gamma 2, smooth muscle, enteric [Source:MGI Symbol;Acc:MGI:104589]
ENSMUSG00000021950	Anxa8	56.163	91.1806	70.9103	171.735	188.908	135.319	14	34085981	34100571	+	1880	protein_coding	annexin A8 [Source:MGI Symbol;Acc:MGI:1201374]
ENSMUSG00000001552	Jup	72.8754	99.5695	98.1739	118.418	195.662	128.354	11	100368958	100397763	-	6436	protein_coding	junction plakoglobin [Source:MGI Symbol;Acc:MGI:96650]
ENSMUSG00000036278	Macrod1	169.95	132.603	133.956	85.6631	69.0393	121.616	19	7056768	7198061	+	1274	protein_coding	MACRO domain containing 1 [Source:MGI Symbol;Acc:MGI:2147583]
ENSMUSG00000042124	Lce1f	103.757	173.008	141.872	144.096	53.1963	94.2849	3	92718685	92720350	-	728	protein_coding	late cornified envelope 1F [Source:MGI Symbol;Acc:MGI:1915078]
ENSMUSG00000028416	Bag1	132.299	123.212	126.361	104.729	104.492	118.343	4	40936398	40948294	-	1349	protein_coding	BCL2-associated athanogene 1 [Source:MGI Symbol;Acc:MGI:108047]
ENSMUSG00000032412	Atp1b3	82.9363	111.919	105.58	121.727	163.719	121.708	9	96332655	96364442	-	2389	protein_coding	ATPase, Na+/K+ transporting, beta 3 polypeptide [Source:MGI Symbol;Acc:MGI:107788]
ENSMUSG00000025132	Arhgdia	105.203	105.847	107.868	120.255	138.08	130.06	11	120578104	120581624	-	2258	protein_coding	Rho GDP dissociation inhibitor (GDI) alpha [Source:MGI Symbol;Acc:MGI:2178103]
ENSMUSG00000049760	2410015M20Rik	114.88	132.28	116.483	117.567	108.13	117.889	17	56607452	56609771	-	755	protein_coding	RIKEN cDNA 2410015M20 gene [Source:MGI Symbol;Acc:MGI:2442174]
ENSMUSG00000026473	Glul	86.2412	75.8767	84.5216	116.719	206.837	136.995	1	153899944	153909723	+	3323	protein_coding	glutamate-ammonia ligase (glutamine synthetase) [Source:MGI Symbol;Acc:MGI:95739]
ENSMUSG00000050335	Lgals3	87.5657	143.879	103.377	126.423	142.613	102.803	14	47367751	47386160	+	1858	protein_coding	lectin, galactose binding, soluble 3 [Source:MGI Symbol;Acc:MGI:96778]
ENSMUSG00000028936	Rpl22	109.358	127.142	107.98	119.121	112.109	127.211	4	152325742	152334071	+	2911	protein_coding	ribosomal protein L22 [Source:MGI Symbol;Acc:MGI:99262]
ENSMUSG00000025503	Taldo1	108.296	141.593	124.554	97.9593	124.83	104.595	7	141392199	141402968	+	2171	protein_coding	transaldolase 1 [Source:MGI Symbol;Acc:MGI:1274789]
ENSMUSG00000062683	Atp5g2	131.458	129.03	129.715	96.7718	98.1398	115.725	15	102662864	102672352	-	1675	protein_coding	ATP synthase, H+ transporting, mitochondrial F0 complex, subunit C2 (subunit 9) [Source:MGI Symbol;Acc:MGI:1915192]
ENSMUSG00000033916	Chmp2a	106.869	137.533	118.497	118.054	112.623	105.918	7	13032010	13034807	-	1162	protein_coding	charged multivesicular body protein 2A [Source:MGI Symbol;Acc:MGI:1916203]
ENSMUSG00000074156	Ces1h	86.2266	111.284	105.776	119.103	181.033	95.6171	8	93351843	93379725	-	1870	protein_coding	carboxylesterase 1H [Source:MGI Symbol;Acc:MGI:1922954]
ENSMUSG00000055302	Mrfap1	126.193	118.16	114.223	100.792	127.678	111.884	5	36794867	36796772	-	1648	protein_coding	Morf4 family associated protein 1 [Source:MGI Symbol;Acc:MGI:1914818]
ENSMUSG00000062647	Rpl7a	92.6716	113.305	122.106	98.7369	146.291	122.892	2	26910764	26913318	+	1781	protein_coding	ribosomal protein L7A [Source:MGI Symbol;Acc:MGI:1353472]
ENSMUSG00000031799	Tpm4	84.5831	96.8692	89.2898	144.714	135.512	145.01	8	72134975	72153142	+	2203	protein_coding	tropomyosin 4 [Source:MGI Symbol;Acc:MGI:2449202]
ENSMUSG00000006356	Crip2	102.521	102.283	109.491	121.004	152.448	107.806	12	113140236	113145506	+	2099	protein_coding	cysteine rich protein 2 [Source:MGI Symbol;Acc:MGI:1915587]
ENSMUSG00000091537	Tma7	120.568	122.622	115.464	109.475	113.745	112.875	9	109074568	109082587	-	1359	protein_coding	translational machinery associated 7 [Source:MGI Symbol;Acc:MGI:1913417]
ENSMUSG00000027077	Smtnl1	169.971	136.154	139.471	86.6874	68.5368	93.4231	2	84811176	84822652	-	1761	protein_coding	smoothelin-like 1 [Source:MGI Symbol;Acc:MGI:1915928]
ENSMUSG00000041120	Nbl1	112.199	136.051	144.84	97.6681	88.3848	110.999	4	139082284	139092993	-	2033	protein_coding	neuroblastoma, suppression of tumorigenicity 1 [Source:MGI Symbol;Acc:MGI:104591]
ENSMUSG00000052374	Actn2	168.681	117.814	157.873	74.572	69.4548	99.8725	13	12269426	12340760	-	3795	protein_coding	actinin alpha 2 [Source:MGI Symbol;Acc:MGI:109192]
ENSMUSG00000047459	Dynlrb1	113.203	123.453	116.329	114.411	106.769	114.094	2	155236533	155250277	+	1009	protein_coding	dynein light chain roadblock-type 1 [Source:MGI Symbol;Acc:MGI:1914318]
ENSMUSG00000035674	Ndufa3	160.366	138.006	123.376	90.7785	80.483	94.3445	7	3617373	3620327	+	1022	protein_coding	NADH dehydrogenase (ubiquinone) 1 alpha subcomplex, 3 [Source:MGI Symbol;Acc:MGI:1913341]
ENSMUSG00000020460	Rps27a	76.0221	147.478	66.087	119.785	94.2393	183.666	11	29545846	29548109	-	1972	protein_coding	ribosomal protein S27A [Source:MGI Symbol;Acc:MGI:1925544]
ENSMUSG00000057113	Npm1	83.6023	106.977	89.8808	124.475	144.87	137.063	11	33152287	33163206	-	2665	protein_coding	nucleophosmin 1 [Source:MGI Symbol;Acc:MGI:106184]
ENSMUSG00000039518	Cdsn	54.7194	94.009	77.6363	145.457	173.748	140.208	17	35552128	35557180	+	2678	protein_coding	corneodesmosin [Source:MGI Symbol;Acc:MGI:3505689]
ENSMUSG00000060591	Ifitm2	77.0108	90.7123	77.0931	138.276	164.034	138.367	7	140954837	140955987	-	655	protein_coding	interferon induced transmembrane protein 2 [Source:MGI Symbol;Acc:MGI:1933382]
ENSMUSG00000050635	Sprr2f	0.210579	0.313711	0.163543	121.134	373.058	188.554	3	92365187	92366442	+	609	protein_coding	small proline-rich protein 2F [Source:MGI Symbol;Acc:MGI:1330349]
ENSMUSG00000047586	Nccrp1	74.857	137.485	118.301	112.066	128.325	112.3	7	28543596	28547254	-	1531	protein_coding	non-specific cytotoxic cell receptor protein 1 homolog (zebrafish) [Source:MGI Symbol;Acc:MGI:2685009]
ENSMUSG00000046434	Hnrnpa1	90.6435	114.052	99.312	121.709	141.81	113.42	15	103240432	103244955	+	1918	protein_coding	heterogeneous nuclear ribonucleoprotein A1 [Source:MGI Symbol;Acc:MGI:104820]
ENSMUSG00000036905	C1qb	68.2467	92.8471	56.0694	153.684	136.949	171.96	4	136880129	136886187	-	1088	protein_coding	complement component 1, q subcomponent, beta polypeptide [Source:MGI Symbol;Acc:MGI:88224]
ENSMUSG00000026728	Vim	112.038	93.8936	94.2114	142.028	102.236	128.683	2	13573927	13582826	+	4743	protein_coding	vimentin [Source:MGI Symbol;Acc:MGI:98932]
ENSMUSG00000083833	Gm13841	72.1309	114.215	95.7828	145.066	134.709	107.014	5	115801677	115802159	-	483	processed_pseudogene	predicted gene 13841 [Source:MGI Symbol;Acc:MGI:3650890]
ENSMUSG00000023089	Ndufa5	138.681	124.405	128.164	91.1807	71.872	106.95	6	24518666	24528013	-	1032	protein_coding	NADH dehydrogenase (ubiquinone) 1 alpha subcomplex, 5 [Source:MGI Symbol;Acc:MGI:1915452]
ENSMUSG00000020592	Sdc1	81.3651	101.77	97.8588	96.5248	166.488	115.754	12	8771323	8793715	+	3809	protein_coding	syndecan 1 [Source:MGI Symbol;Acc:MGI:1349162]
ENSMUSG00000024844	Banf1	103.324	109.388	110.651	85.8237	131.778	117.789	19	5364641	5366645	-	820	protein_coding	barrier to autointegration factor 1 [Source:MGI Symbol;Acc:MGI:1346330]
ENSMUSG00000024248	Cox7a2l	121.422	124.674	119.352	95.2634	90.0245	107.012	17	83501919	83514333	-	1147	protein_coding	cytochrome c oxidase subunit VIIa polypeptide 2-like [Source:MGI Symbol;Acc:MGI:106015]
ENSMUSG00000060636	Rpl35a	101.062	124.567	97.7616	116.69	109.658	106.358	16	33056453	33060189	+	3526	protein_coding	ribosomal protein L35A [Source:MGI Symbol;Acc:MGI:1928894]
ENSMUSG00000020722	Cacng1	167.636	149.329	161.717	71.5968	46.7394	58.657	11	107703218	107716522	-	1249	protein_coding	calcium channel, voltage-dependent, gamma subunit 1 [Source:MGI Symbol;Acc:MGI:1206582]
ENSMUSG00000020321	Mdh1	126.228	114.541	114.38	85.9223	85.948	128.244	11	21556787	21572367	-	2567	protein_coding	malate dehydrogenase 1, NAD (soluble) [Source:MGI Symbol;Acc:MGI:97051]
ENSMUSG00000003032	Klf4	95.0428	118.678	105.134	113.86	132.518	86.7563	4	55527143	55532466	-	3049	protein_coding	Kruppel-like factor 4 (gut) [Source:MGI Symbol;Acc:MGI:1342287]
ENSMUSG00000041203	Trir	97.9591	94.0953	88.6662	108.575	141.766	119.779	8	85026823	85030286	+	902	protein_coding	telomerase RNA component interacting RNase [Source:MGI Symbol;Acc:MGI:1922833]
ENSMUSG00000006699	Cdc42	104.102	111.065	105.357	109.613	106.848	111.863	4	137319696	137357720	-	2966	protein_coding	cell division cycle 42 [Source:MGI Symbol;Acc:MGI:106211]
ENSMUSG00000035199	Arl6ip5	142.383	129.608	134.996	89.5964	61.9631	90.2612	6	97210689	97233315	+	1442	protein_coding	ADP-ribosylation factor-like 6 interacting protein 5 [Source:MGI Symbol;Acc:MGI:1929501]
ENSMUSG00000028692	Akr1a1	101.335	108.777	102.658	112.386	110.78	111.971	4	116636510	116651680	-	2750	protein_coding	aldo-keto reductase family 1, member A1 (aldehyde reductase) [Source:MGI Symbol;Acc:MGI:1929955]
ENSMUSG00000040952	Rps19	94.0172	119.207	98.3115	107.051	119.772	109.179	7	24884371	24889806	+	4685	protein_coding	ribosomal protein S19 [Source:MGI Symbol;Acc:MGI:1333780]
ENSMUSG00000015837	Sqstm1	123.262	118.068	119.111	93.3928	88.7229	103.716	11	50199366	50210827	-	3356	protein_coding	sequestosome 1 [Source:MGI Symbol;Acc:MGI:107931]
ENSMUSG00000026450	Chit1	39.9212	57.3676	54.2437	171.666	189.864	132.569	1	134111242	134151540	+	1815	protein_coding	chitinase 1 (chitotriosidase) [Source:MGI Symbol;Acc:MGI:1919134]
ENSMUSG00000036594	H2-Aa	43.9337	105.669	37.3624	146.614	125.152	186.381	17	34282744	34287827	-	1874	protein_coding	histocompatibility 2, class II antigen A, alpha [Source:MGI Symbol;Acc:MGI:95895]
ENSMUSG00000024914	Drap1	131.459	119.996	113.928	84.2893	88.1751	105.955	19	5422805	5424979	-	1741	protein_coding	Dr1 associated protein 1 (negative cofactor 2 alpha) [Source:MGI Symbol;Acc:MGI:1913806]
ENSMUSG00000037852	Cpe	100.258	92.3396	107.843	104.026	122.978	116.314	8	64592542	64693054	-	2609	protein_coding	carboxypeptidase E [Source:MGI Symbol;Acc:MGI:101932]
ENSMUSG00000101249	Gm29216	116.166	91.1565	106.278	163.384	58.2845	107.681	1	24615706	24616197	-	492	unprocessed_pseudogene	predicted gene 29216 [Source:MGI Symbol;Acc:MGI:5579922]
ENSMUSG00000020216	Jsrp1	153.962	118.349	137.18	74.9249	57.1201	99.3292	10	80808496	80813498	-	1333	protein_coding	junctional sarcoplasmic reticulum protein 1 [Source:MGI Symbol;Acc:MGI:1916700]
ENSMUSG00000039105	Atp6v1g1	116.379	125.866	112.629	91.492	97.3016	96.7678	4	63544772	63550750	+	1135	protein_coding	ATPase, H+ transporting, lysosomal V1 subunit G1 [Source:MGI Symbol;Acc:MGI:1913540]
ENSMUSG00000075706	Gpx4	129.532	108.546	116.322	96.6558	75.2191	114.055	10	80047166	80056439	+	1724	protein_coding	glutathione peroxidase 4 [Source:MGI Symbol;Acc:MGI:104767]
ENSMUSG00000028691	Prdx1	91.1282	96.3569	83.1344	121.199	126.78	121.255	4	116685544	116700822	+	3043	protein_coding	peroxiredoxin 1 [Source:MGI Symbol;Acc:MGI:99523]
ENSMUSG00000046056	Sbsn	123.585	149.678	157.076	67.3283	75.0206	66.9619	7	30751471	30756134	+	3625	protein_coding	suprabasin [Source:MGI Symbol;Acc:MGI:2446326]
ENSMUSG00000028849	Map7d1	121.454	99.9063	116.015	84.8814	97.4944	117.811	4	126232167	126256343	-	3652	protein_coding	MAP7 domain containing 1 [Source:MGI Symbol;Acc:MGI:2384297]
ENSMUSG00000014769	Psmb1	101.422	110.693	94.5024	111.046	109.094	109.271	17	15475721	15498276	-	1036	protein_coding	proteasome (prosome, macropain) subunit, beta type 1 [Source:MGI Symbol;Acc:MGI:104884]
ENSMUSG00000013593	Ndufs2	120.333	106.449	111.697	91.259	90.2605	115.875	1	171234853	171251388	-	2313	protein_coding	NADH dehydrogenase (ubiquinone) Fe-S protein 2 [Source:MGI Symbol;Acc:MGI:2385112]
ENSMUSG00000018770	Atp5g3	120.657	101.898	102.566	93.3048	105.015	112.003	2	73908447	73911326	-	2181	protein_coding	ATP synthase, H+ transporting, mitochondrial F0 complex, subunit C3 (subunit 9) [Source:MGI Symbol;Acc:MGI:2442035]
ENSMUSG00000033940	Brk1	100.525	106.168	104.964	103.935	108.911	107.872	6	113604772	113616951	+	1095	protein_coding	BRICK1, SCAR/WAVE actin-nucleating complex subunit [Source:MGI Symbol;Acc:MGI:1915406]
ENSMUSG00000026032	Ndufb3	126.674	126.699	116.632	85.1846	73.5533	102.897	1	58586384	58595964	+	763	protein_coding	NADH dehydrogenase (ubiquinone) 1 beta subcomplex 3 [Source:MGI Symbol;Acc:MGI:1913745]
ENSMUSG00000022452	Smdt1	112.445	113.397	111.62	92.0383	99.1515	102.791	15	82338959	82349091	+	1077	protein_coding	single-pass membrane protein with aspartate rich tail 1 [Source:MGI Symbol;Acc:MGI:1916279]
ENSMUSG00000072235	Tuba1a	121.702	126.613	129.652	84.0935	72.6829	95.5905	15	98949841	98953551	-	1647	protein_coding	tubulin, alpha 1A [Source:MGI Symbol;Acc:MGI:98869]
ENSMUSG00000020326	Ccng1	169.968	131.673	127.843	74.0523	53.2778	72.0813	11	40748552	40755311	-	3512	protein_coding	cyclin G1 [Source:MGI Symbol;Acc:MGI:102890]
ENSMUSG00000038462	Uqcrfs1	130.093	105.687	113.591	89.5162	89.9945	99.4042	13	30540308	30545362	-	1363	protein_coding	ubiquinol-cytochrome c reductase, Rieske iron-sulfur polypeptide 1 [Source:MGI Symbol;Acc:MGI:1913944]
ENSMUSG00000001175	Calm1	105.207	116.23	108.867	98.0375	99.0737	99.8152	12	100199435	100209814	+	4706	protein_coding	calmodulin 1 [Source:MGI Symbol;Acc:MGI:88251]
ENSMUSG00000022336	Eif3e	98.7548	113.347	96.6569	103.27	101.349	112.869	15	43250040	43282736	-	1541	protein_coding	eukaryotic translation initiation factor 3, subunit E [Source:MGI Symbol;Acc:MGI:99257]
ENSMUSG00000071014	Ndufb6	121.107	110.383	102.167	89.5949	93.6274	106.685	4	40270591	40279421	-	659	protein_coding	NADH dehydrogenase (ubiquinone) 1 beta subcomplex, 6 [Source:MGI Symbol;Acc:MGI:2684983]
ENSMUSG00000063524	Eno1	64.8326	97.7626	81.7112	100.314	147.905	130.409	4	150236721	150248879	+	5379	protein_coding	enolase 1, alpha non-neuron [Source:MGI Symbol;Acc:MGI:95393]
ENSMUSG00000036781	Rps27l	105.664	110.568	95.5088	95.701	102.51	112.343	9	66946086	66949516	+	816	protein_coding	ribosomal protein S27-like [Source:MGI Symbol;Acc:MGI:1915191]
ENSMUSG00000025784	Clec3b	132.336	122.68	111.395	104.725	53.5135	96.274	9	123150946	123157432	+	992	protein_coding	C-type lectin domain family 3, member b [Source:MGI Symbol;Acc:MGI:104540]
ENSMUSG00000042808	Gpx2	51.7163	86.3787	68.0367	125.675	171.265	117.66	12	76792333	76795554	-	3222	protein_coding	glutathione peroxidase 2 [Source:MGI Symbol;Acc:MGI:106609]
ENSMUSG00000058672	Tubb2a	56.9525	79.4459	63.3775	108.923	192.279	119.259	13	34074274	34078007	-	1610	protein_coding	tubulin, beta 2A class IIA [Source:MGI Symbol;Acc:MGI:107861]
ENSMUSG00000004885	Crabp2	99.5287	169.011	133.048	50.2988	80.8383	81.599	3	87948666	87953376	+	1322	protein_coding	cellular retinoic acid binding protein II [Source:MGI Symbol;Acc:MGI:88491]
ENSMUSG00000021024	Psma6	98.2431	104.853	93.9075	104.448	111.105	101.189	12	55384222	55418454	+	1234	protein_coding	proteasome (prosome, macropain) subunit, alpha type 6 [Source:MGI Symbol;Acc:MGI:1347006]
ENSMUSG00000002015	Bcap31	105.168	111.002	112.875	95.7137	93.087	95.6347	X	73686178	73716175	-	1219	protein_coding	B cell receptor associated protein 31 [Source:MGI Symbol;Acc:MGI:1350933]
ENSMUSG00000058655	Eif4b	97.9987	106.012	101.381	99.5539	104.131	103.417	15	102073773	102097172	+	3853	protein_coding	eukaryotic translation initiation factor 4B [Source:MGI Symbol;Acc:MGI:95304]
ENSMUSG00000022218	Tgm1	65.0172	83.926	82.9815	93.3972	176.271	110.097	14	55700009	55713492	-	3006	protein_coding	transglutaminase 1, K polypeptide [Source:MGI Symbol;Acc:MGI:98730]
ENSMUSG00000007041	Clic1	70.1212	89.7106	81.4663	107.014	141.909	120.621	17	35049966	35058749	+	1799	protein_coding	chloride intracellular channel 1 [Source:MGI Symbol;Acc:MGI:2148924]
ENSMUSG00000023020	Cox14	112.515	107.152	111.996	91.1782	84.7154	103.117	15	99725618	99728136	+	723	protein_coding	cytochrome c oxidase assembly protein 14 [Source:MGI Symbol;Acc:MGI:1913629]
ENSMUSG00000020821	Kif1c	124.923	110.347	116.003	84.9657	84.8451	88.8013	11	70700548	70731964	+	7276	protein_coding	kinesin family member 1C [Source:MGI Symbol;Acc:MGI:1098260]
ENSMUSG00000032330	Cox7a2	110.854	112.272	99.3866	93.8417	81.6574	111.847	9	79755361	79759878	-	944	protein_coding	cytochrome c oxidase subunit VIIa 2 [Source:MGI Symbol;Acc:MGI:1316715]
ENSMUSG00000019179	Mdh2	126.466	108.049	111.327	78.831	85.688	99.1792	5	135778480	135790398	+	3562	protein_coding	malate dehydrogenase 2, NAD (mitochondrial) [Source:MGI Symbol;Acc:MGI:97050]
ENSMUSG00000001056	Nhp2	66.8443	96.3169	84.432	108.775	135.101	118.045	11	51619735	51623714	+	1146	protein_coding	NHP2 ribonucleoprotein [Source:MGI Symbol;Acc:MGI:1098547]
ENSMUSG00000026989	Dapl1	175.208	181.202	201.836	23.9632	5.31684	17.5434	2	59484653	59505020	+	679	protein_coding	death associated protein-like 1 [Source:MGI Symbol;Acc:MGI:1923997]
ENSMUSG00000064373	Selenop	99.3936	103.08	99.5451	117.576	67.3692	117.177	15	3268547	3280508	+	2845	protein_coding	selenoprotein P [Source:MGI Symbol;Acc:MGI:894288]
ENSMUSG00000040048	Ndufb10	122.447	104.198	109.827	83.0447	82.1159	102.5	17	24722060	24724478	-	1217	protein_coding	NADH dehydrogenase (ubiquinone) 1 beta subcomplex, 10 [Source:MGI Symbol;Acc:MGI:1915592]
ENSMUSG00000007097	Atp1a2	129.755	107.863	124.009	77.2819	58.0448	107.067	1	172271709	172298064	-	7038	protein_coding	ATPase, Na+/K+ transporting, alpha 2 polypeptide [Source:MGI Symbol;Acc:MGI:88106]
ENSMUSG00000075296	Aldh3b2	96.117	121.849	123.113	97.7872	91.6483	69.1575	19	3972328	3981645	+	2141	protein_coding	aldehyde dehydrogenase 3 family, member B2 [Source:MGI Symbol;Acc:MGI:2147613]
ENSMUSG00000031372	Trex2	65.9077	131.124	99.059	89.3604	121.782	89.4024	X	73433705	73435344	-	1017	protein_coding	three prime repair exonuclease 2 [Source:MGI Symbol;Acc:MGI:1346343]
ENSMUSG00000004655	Aqp1	78.2538	85.1798	83.0865	133.157	93.4797	123.46	6	55336432	55348555	+	2627	protein_coding	aquaporin 1 [Source:MGI Symbol;Acc:MGI:103201]
ENSMUSG00000105388	Rpl36a-ps2	71.6454	86.895	85.3251	142.45	97.6403	111.975	3	145879020	145879340	+	321	processed_pseudogene	ribosomal protein L36A, pseudogene 2 [Source:MGI Symbol;Acc:MGI:3780887]
ENSMUSG00000001794	Capns1	96.1431	102.872	94.0689	88.884	105.053	108.657	7	30186936	30198811	-	2477	protein_coding	calpain, small subunit 1 [Source:MGI Symbol;Acc:MGI:88266]
ENSMUSG00000020190	Mknk2	105.606	106.999	111.561	78.6276	90.987	99.1492	10	80665327	80678112	-	3892	protein_coding	MAP kinase-interacting serine/threonine kinase 2 [Source:MGI Symbol;Acc:MGI:894279]
ENSMUSG00000015092	Edf1	101.172	108.254	105.08	88.0558	95.1937	95.1597	2	25557847	25562082	+	1317	protein_coding	endothelial differentiation-related factor 1 [Source:MGI Symbol;Acc:MGI:1891227]
ENSMUSG00000021939	Ctsb	80.9031	86.1161	79.1876	126.659	103.073	116.505	14	63122462	63145923	+	6051	protein_coding	cathepsin B [Source:MGI Symbol;Acc:MGI:88561]
ENSMUSG00000021290	2010107E04Rik	120.058	109.104	94.6873	83.3346	77.6663	106.504	12	111961375	111966977	-	1217	protein_coding	RIKEN cDNA 2010107E04 gene [Source:MGI Symbol;Acc:MGI:1917507]
ENSMUSG00000059796	Eif4a1	77.2	95.1172	83.4193	102.891	124.985	107.172	11	69666936	69672423	-	4334	protein_coding	eukaryotic translation initiation factor 4A1 [Source:MGI Symbol;Acc:MGI:95303]
ENSMUSG00000022871	Fetub	55.2612	136.097	97.8275	114.282	74.4784	112.018	16	22918382	22939766	+	1913	protein_coding	fetuin beta [Source:MGI Symbol;Acc:MGI:1890221]
ENSMUSG00000046354	Defb14	24.7265	82.4137	33.6874	69.3846	222.818	156.392	8	19194357	19195212	+	204	protein_coding	defensin beta 14 [Source:MGI Symbol;Acc:MGI:2675345]
ENSMUSG00000027613	Eif6	57.4291	79.4568	72.4682	118.576	156.293	104.233	2	155819832	155826925	-	2702	protein_coding	eukaryotic translation initiation factor 6 [Source:MGI Symbol;Acc:MGI:1196288]
ENSMUSG00000030409	Dmpk	143.88	109.754	129.477	74.2281	54.9611	75.6243	7	19083849	19093821	+	4330	protein_coding	dystrophia myotonica-protein kinase [Source:MGI Symbol;Acc:MGI:94906]
ENSMUSG00000055301	Adh7	65.6057	113.56	87.6575	112.094	124.232	84.4881	3	138217760	138233382	+	3787	protein_coding	alcohol dehydrogenase 7 (class IV), mu or sigma polypeptide [Source:MGI Symbol;Acc:MGI:87926]
ENSMUSG00000001525	Tubb5	66.4405	71.6796	84.1805	104.677	142.987	117.539	17	35833921	35838306	-	3327	protein_coding	tubulin, beta 5 class I [Source:MGI Symbol;Acc:MGI:107812]
ENSMUSG00000049598	Vsig8	58.0129	69.3941	71.1336	92.2496	188.004	108.703	1	172555938	172563717	+	1879	protein_coding	V-set and immunoglobulin domain containing 8 [Source:MGI Symbol;Acc:MGI:3642995]
ENSMUSG00000001891	Ugp2	135.499	109.345	115.24	74.7271	56.9046	94.4015	11	21321138	21371201	-	3069	protein_coding	UDP-glucose pyrophosphorylase 2 [Source:MGI Symbol;Acc:MGI:2183447]
ENSMUSG00000011632	Pinlyp	82.4525	136.772	105.505	87.039	107.111	66.2054	7	24541658	24546118	-	843	protein_coding	phospholipase A2 inhibitor and LY6/PLAUR domain containing [Source:MGI Symbol;Acc:MGI:3615324]
ENSMUSG00000020386	Sar1b	115.027	107.818	100.947	87.5222	81.9178	91.0329	11	51763687	51791925	+	1255	protein_coding	secretion associated Ras related GTPase 1B [Source:MGI Symbol;Acc:MGI:1913647]
ENSMUSG00000024966	Stip1	127.692	89.8541	122.813	70.2312	81.501	91.638	19	7020696	7040026	-	2173	protein_coding	stress-induced phosphoprotein 1 [Source:MGI Symbol;Acc:MGI:109130]
ENSMUSG00000031451	Gas6	96.8698	93.4255	100.184	102	78.9411	110.746	8	13465374	13494490	-	2548	protein_coding	growth arrest specific 6 [Source:MGI Symbol;Acc:MGI:95660]
ENSMUSG00000031328	Flna	118.77	96.2262	114.437	77.1707	86.6092	87.7001	X	74223461	74249820	-	9400	protein_coding	filamin, alpha [Source:MGI Symbol;Acc:MGI:95556]
ENSMUSG00000028843	Sh3bgrl3	72.1657	97.2121	90.2566	105.591	108.682	105.825	4	134127406	134128789	-	821	protein_coding	SH3 domain binding glutamic acid-rich protein-like 3 [Source:MGI Symbol;Acc:MGI:1920973]
ENSMUSG00000030484	Lypd5	93.552	126.307	125.287	78.4609	78.6588	76.2501	7	24349196	24355109	+	2239	protein_coding	Ly6/Plaur domain containing 5 [Source:MGI Symbol;Acc:MGI:1924192]
ENSMUSG00000009013	Dynll1	86.8247	104.181	94.0289	95.2064	104.828	92.9258	5	115297110	115300999	-	3890	protein_coding	dynein light chain LC8-type 1 [Source:MGI Symbol;Acc:MGI:1861457]
ENSMUSG00000005148	Klf5	65.9718	85.2287	80.6735	100.591	152.226	91.9643	14	99298691	99313405	+	1721	protein_coding	Kruppel-like factor 5 [Source:MGI Symbol;Acc:MGI:1338056]
ENSMUSG00000090862	Rps13	85.8763	105.127	89.5676	94.5475	107.706	93.2524	7	116331505	116334195	-	2691	protein_coding	ribosomal protein S13 [Source:MGI Symbol;Acc:MGI:1915302]
ENSMUSG00000020671	Rab10	107.362	101.208	106.019	89.2943	91.0521	79.5893	12	3247428	3309969	-	3513	protein_coding	RAB10, member RAS oncogene family [Source:MGI Symbol;Acc:MGI:105066]
ENSMUSG00000044322	Dsc1	70.777	99.2456	92.0464	131.323	122.593	58.4258	18	20084184	20114871	-	5045	protein_coding	desmocollin 1 [Source:MGI Symbol;Acc:MGI:109173]
ENSMUSG00000024048	Myl12a	96.3522	91.7947	97.793	89.4571	95.2619	102.623	17	70993656	71002878	-	3201	protein_coding	myosin, light chain 12A, regulatory, non-sarcomeric [Source:MGI Symbol;Acc:MGI:1914518]
ENSMUSG00000026796	Fam129b	82.8508	116.656	110.662	79.0725	103.017	80.9824	2	32876114	32925254	+	4672	protein_coding	family with sequence similarity 129, member B [Source:MGI Symbol;Acc:MGI:2442910]
ENSMUSG00000004044	Cavin1	110.164	101.251	108.788	85.4238	78.8805	87.9216	11	100956733	100970887	-	3587	protein_coding	caveolae associated 1 [Source:MGI Symbol;Acc:MGI:1277968]
ENSMUSG00000018340	Anxa6	135.114	110.685	113.433	84.5026	49.2571	78.6662	11	54979108	55033445	-	2930	protein_coding	annexin A6 [Source:MGI Symbol;Acc:MGI:88255]
ENSMUSG00000038467	Chmp4b	90.2401	106.246	97.3865	91.6486	92.9573	92.6906	2	154651705	154694785	+	2027	protein_coding	charged multivesicular body protein 4B [Source:MGI Symbol;Acc:MGI:1922858]
ENSMUSG00000034282	Evpl	108.791	134.295	142.329	61.9083	64.0811	59.2458	11	116220559	116238077	-	6384	protein_coding	envoplakin [Source:MGI Symbol;Acc:MGI:107507]
ENSMUSG00000079017	Ifi27l2a	79.8631	135.447	49.3686	86.7612	83.1118	135.565	12	103442167	103443680	-	463	protein_coding	interferon, alpha-inducible protein 27 like 2A [Source:MGI Symbol;Acc:MGI:1924183]
ENSMUSG00000060032	H2afj	78.4211	108.646	98.5913	97.606	106.739	79.8882	6	136808244	136810074	+	1831	protein_coding	H2A histone family, member J [Source:MGI Symbol;Acc:MGI:3606192]
ENSMUSG00000044080	S100a1	116.909	105.917	88.0449	68.239	53.2015	134.973	3	90511034	90514392	-	694	protein_coding	S100 calcium binding protein A1 [Source:MGI Symbol;Acc:MGI:1338917]
ENSMUSG00000068396	Rpl34-ps1	89.963	78.6597	68.9306	141.378	92.8261	94.5952	6	71124610	71124963	+	354	processed_pseudogene	ribosomal protein L34, pseudogene 1 [Source:MGI Symbol;Acc:MGI:3704270]
ENSMUSG00000034362	Csta1	45.5892	66.8469	51.3019	114.618	177.467	110.389	16	36119946	36131241	-	2783	protein_coding	cystatin A1 [Source:MGI Symbol;Acc:MGI:3524930]
ENSMUSG00000022505	Emp2	103.837	135.304	124.265	71.385	76.8966	54.3631	16	10281749	10313968	-	3440	protein_coding	epithelial membrane protein 2 [Source:MGI Symbol;Acc:MGI:1098726]
ENSMUSG00000020803	Txndc17	56.5985	75.7201	61.0449	109.904	147.954	114.695	11	72207547	72210015	+	1324	protein_coding	thioredoxin domain containing 17 [Source:MGI Symbol;Acc:MGI:1289248]
ENSMUSG00000020390	Ube2b	135.481	113.498	119.625	76.7616	54.4353	65.8644	11	51985497	52000762	-	2126	protein_coding	ubiquitin-conjugating enzyme E2B [Source:MGI Symbol;Acc:MGI:102944]
ENSMUSG00000021200	Asb2	150.859	107.284	132.103	46.9084	49.5488	78.4438	12	103321142	103356001	-	3542	protein_coding	ankyrin repeat and SOCS box-containing 2 [Source:MGI Symbol;Acc:MGI:1929743]
ENSMUSG00000030357	Fkbp4	119.02	98.7718	113.584	69.905	76.8232	86.9661	6	128429735	128438677	-	2795	protein_coding	FK506 binding protein 4 [Source:MGI Symbol;Acc:MGI:95543]
ENSMUSG00000021577	Sdha	118.535	100.144	105.331	80.805	72.3642	87.2372	13	74322254	74350280	-	4126	protein_coding	succinate dehydrogenase complex, subunit A, flavoprotein (Fp) [Source:MGI Symbol;Acc:MGI:1914195]
ENSMUSG00000024208	Uqcc2	105.413	102.544	90.0781	76.8631	94.2039	94.198	17	27122663	27133916	-	837	protein_coding	ubiquinol-cytochrome c reductase complex assembly factor 2 [Source:MGI Symbol;Acc:MGI:1914517]
ENSMUSG00000042406	Atf4	94.3471	85.025	86.888	94.3283	115.006	87.6247	15	80255184	80257540	+	1724	protein_coding	activating transcription factor 4 [Source:MGI Symbol;Acc:MGI:88096]
ENSMUSG00000020719	Ddx5	100.721	87.8168	92.3887	101.46	91.4113	86.7405	11	106780355	106789185	-	5775	protein_coding	DEAD (Asp-Glu-Ala-Asp) box polypeptide 5 [Source:MGI Symbol;Acc:MGI:105037]
ENSMUSG00000029059	Fam213b	101.479	116.639	102.701	90.8518	72.5814	76.0815	4	154895504	154899135	-	1027	protein_coding	family with sequence similarity 213, member B [Source:MGI Symbol;Acc:MGI:1913719]
ENSMUSG00000043461	Sptssb	129.881	160.839	157.224	44.4088	34.1719	33.2334	3	69819542	69859940	-	1826	protein_coding	serine palmitoyltransferase, small subunit B [Source:MGI Symbol;Acc:MGI:1913433]
ENSMUSG00000074445	Sprr2a3	6.0496	12.7897	5.04379	265.686	63.0803	205.968	3	92285417	92291405	+	2883	protein_coding	small proline-rich protein 2A3 [Source:MGI Symbol;Acc:MGI:3845028]
ENSMUSG00000048455	Sprr1b	9.11604	29.2905	14.3997	126.016	273.726	105.179	3	92436809	92438789	-	830	protein_coding	small proline-rich protein 1B [Source:MGI Symbol;Acc:MGI:106659]
ENSMUSG00000067006	Serpinb5	70.1681	89.7066	76.7083	112.177	126.161	82.8005	1	106861173	106883348	+	2750	protein_coding	serine (or cysteine) peptidase inhibitor, clade B, member 5 [Source:MGI Symbol;Acc:MGI:109579]
ENSMUSG00000036199	Ndufa13	120.11	103.008	104.932	67.4641	63.7171	96.4845	8	69894180	69902558	-	1251	protein_coding	NADH dehydrogenase (ubiquinone) 1 alpha subcomplex, 13 [Source:MGI Symbol;Acc:MGI:1914434]
ENSMUSG00000037499	Nenf	115.626	115.544	106.242	76.3638	65.6278	74.2068	1	191306789	191318194	-	742	protein_coding	neuron derived neurotrophic factor [Source:MGI Symbol;Acc:MGI:1913458]
ENSMUSG00000018830	Myh11	138.942	129.633	147.542	50.112	35.222	50.995	16	14194527	14291408	-	6632	protein_coding	myosin, heavy polypeptide 11, smooth muscle [Source:MGI Symbol;Acc:MGI:102643]
ENSMUSG00000054808	Actn4	72.7343	89.998	85.3334	88.8159	119.651	94.707	7	28893248	28962340	-	6127	protein_coding	actinin alpha 4 [Source:MGI Symbol;Acc:MGI:1890773]
ENSMUSG00000011752	Pgam1	58.0862	77.6043	74.3039	82.7953	146.845	110.984	19	41911871	41918664	+	1831	protein_coding	phosphoglycerate mutase 1 [Source:MGI Symbol;Acc:MGI:97552]
ENSMUSG00000037185	Krt80	93.4952	138.926	132.806	53.5651	59.1776	71.0682	15	101349571	101370125	-	1774	protein_coding	keratin 80 [Source:MGI Symbol;Acc:MGI:1921377]
ENSMUSG00000056632	Dsg3	30.9264	58.4009	46.4288	148.933	148.059	115.957	18	20510304	20541310	+	4108	protein_coding	desmoglein 3 [Source:MGI Symbol;Acc:MGI:99499]
ENSMUSG00000017204	Gsdma	81.1199	137.243	116.075	83.7091	61.2204	69.1673	11	98664351	98677708	+	2726	protein_coding	gasdermin A [Source:MGI Symbol;Acc:MGI:1889509]
ENSMUSG00000058603	Rpl28-ps1	64.2245	70.4901	82.5169	161.255	86.2104	83.7027	1	128038569	128038982	+	414	processed_pseudogene	ribosomal protein L28, pseudogene 1 [Source:MGI Symbol;Acc:MGI:3705349]
ENSMUSG00000022956	Atp5o	104.097	100.451	94.6817	81.2993	75.6742	91.8737	16	91684398	91931687	-	2259	protein_coding	ATP synthase, H+ transporting, mitochondrial F1 complex, O subunit [Source:MGI Symbol;Acc:MGI:106341]
ENSMUSG00000001924	Uba1	76.1011	84.9595	90.5349	93.4237	112.21	90.7505	X	20658326	20683179	+	4819	protein_coding	ubiquitin-like modifier activating enzyme 1 [Source:MGI Symbol;Acc:MGI:98890]
ENSMUSG00000078193	Gm2000	81.3644	84.8992	85.3854	126.141	76.9781	93.0342	1	156366040	156366484	+	445	protein_coding	predicted gene 2000 [Source:MGI Symbol;Acc:MGI:3780170]
ENSMUSG00000031636	Pdlim3	134.247	105.909	108.721	67.2346	58.942	71.7285	8	45885461	45919548	+	5147	protein_coding	PDZ and LIM domain 3 [Source:MGI Symbol;Acc:MGI:1859274]
ENSMUSG00000028648	Ndufs5	109.304	100.357	99.9451	75.3715	75.1316	86.1092	4	123712710	123718202	-	860	protein_coding	NADH dehydrogenase (ubiquinone) Fe-S protein 5 [Source:MGI Symbol;Acc:MGI:1890889]
ENSMUSG00000038776	Ephx1	115.879	121.488	99.4189	66.5041	60.6107	81.5702	1	180976210	181020904	-	1950	protein_coding	epoxide hydrolase 1, microsomal [Source:MGI Symbol;Acc:MGI:95405]
ENSMUSG00000069833	Ahnak	99.6336	107.417	102.912	92.3441	76.5972	65.9331	19	8989284	9076919	+	18543	protein_coding	AHNAK nucleoprotein (desmoyokin) [Source:MGI Symbol;Acc:MGI:1316648]
ENSMUSG00000006390	Elovl1	75.3805	92.9669	84.7091	95.9541	101.251	91.3369	4	118428093	118432953	+	2726	protein_coding	elongation of very long chain fatty acids (FEN1/Elo2, SUR4/Elo3, yeast)-like 1 [Source:MGI Symbol;Acc:MGI:1858959]
ENSMUSG00000038633	Degs1	84.9671	96.3361	95.523	93.976	94.1927	74.2019	1	182275772	182282804	-	2591	protein_coding	delta(4)-desaturase, sphingolipid 1 [Source:MGI Symbol;Acc:MGI:1097711]
ENSMUSG00000054065	Pkp3	46.9206	77.7329	69.3135	95.3722	157.732	91.7201	7	141078218	141090510	+	3616	protein_coding	plakophilin 3 [Source:MGI Symbol;Acc:MGI:1891830]
ENSMUSG00000006932	Ctnnb1	76.5783	82.5172	77.5469	96.1051	112.335	92.4774	9	120929216	120960507	+	5192	protein_coding	catenin (cadherin associated protein), beta 1 [Source:MGI Symbol;Acc:MGI:88276]
ENSMUSG00000038650	Rnh1	72.6082	97.3847	83.318	100.072	104.585	78.6921	7	141160326	141172857	-	2594	protein_coding	ribonuclease/angiogenin inhibitor 1 [Source:MGI Symbol;Acc:MGI:1195456]
ENSMUSG00000079477	Rab7	90.4577	98.7274	95.7435	87.0747	83.7304	80.5076	6	87999106	88045270	-	2610	protein_coding	RAB7, member RAS oncogene family [Source:MGI Symbol;Acc:MGI:105068]
ENSMUSG00000052974	Cyp2f2	116.231	217.349	183.653	8.623	2.6134	7.58958	7	27119909	27133660	+	2025	protein_coding	cytochrome P450, family 2, subfamily f, polypeptide 2 [Source:MGI Symbol;Acc:MGI:88608]
ENSMUSG00000026688	Mgst3	115.033	127.004	113.761	63.2683	49.2889	67.6577	1	167371966	167393841	-	1097	protein_coding	microsomal glutathione S-transferase 3 [Source:MGI Symbol;Acc:MGI:1913697]
ENSMUSG00000017707	Serinc3	79.7509	91.6692	81.5845	112.775	75.6598	94.0707	2	163623272	163645131	-	3840	protein_coding	serine incorporator 3 [Source:MGI Symbol;Acc:MGI:1349457]
ENSMUSG00000017466	Timp2	95.8199	97.9156	90.8164	96.0558	64.9691	89.2763	11	118301069	118355740	-	3896	protein_coding	tissue inhibitor of metalloproteinase 2 [Source:MGI Symbol;Acc:MGI:98753]
ENSMUSG00000045983	Eif4g1	92.8947	87.4952	90.1368	80.5813	95.6438	87.2941	16	20668313	20692884	+	7227	protein_coding	eukaryotic translation initiation factor 4, gamma 1 [Source:MGI Symbol;Acc:MGI:2384784]
ENSMUSG00000047139	Cd24a	63.094	80.0114	68.1356	109.605	115.552	97.0222	10	43578284	43584265	+	2580	protein_coding	CD24a antigen [Source:MGI Symbol;Acc:MGI:88323]
ENSMUSG00000046352	Gjb2	41.5749	58.6212	50.5439	101.514	171.582	109.284	14	57098600	57104702	-	2406	protein_coding	gap junction protein, beta 2 [Source:MGI Symbol;Acc:MGI:95720]
ENSMUSG00000021270	Hsp90aa1	119.652	80.2522	114.964	60.5393	71.2159	86.4683	12	110690605	110702728	-	3931	protein_coding	heat shock protein 90, alpha (cytosolic), class A member 1 [Source:MGI Symbol;Acc:MGI:96250]
ENSMUSG00000038612	Mcl1	75.002	79.8044	76.0969	96.3947	103.905	99.9213	3	95658788	95663176	+	3418	protein_coding	myeloid cell leukemia sequence 1 [Source:MGI Symbol;Acc:MGI:101769]
ENSMUSG00000025809	Itgb1	93.4559	85.7056	85.0887	86.3529	83.1442	96.078	8	128685654	128733200	+	4081	protein_coding	integrin beta 1 (fibronectin receptor beta) [Source:MGI Symbol;Acc:MGI:96610]
ENSMUSG00000024740	Ddb1	76.1534	82.8803	83.9688	95.5336	102.536	87.8312	19	10605625	10629813	+	4155	protein_coding	damage specific DNA binding protein 1 [Source:MGI Symbol;Acc:MGI:1202384]
ENSMUSG00000084838	Gm10241	49.0251	126.921	116.487	65.3714	149.036	20.6794	16	20176727	20177012	-	286	processed_pseudogene	predicted pseudogene 10241 [Source:MGI Symbol;Acc:MGI:3704461]
ENSMUSG00000036309	Skp1a	93.8474	95.2009	92.4127	88.2496	78.5974	78.8357	11	52231995	52246858	+	2211	protein_coding	S-phase kinase-associated protein 1A [Source:MGI Symbol;Acc:MGI:103575]
ENSMUSG00000022437	Samm50	93.2116	90.3291	86.56	84.2362	81.1412	89.0262	15	84192233	84214303	+	1673	protein_coding	SAMM50 sorting and assembly machinery component [Source:MGI Symbol;Acc:MGI:1915903]
ENSMUSG00000019577	Pdk4	146.006	94.2054	141.525	101.615	24.9581	15.9791	6	5483351	5496309	-	3511	protein_coding	pyruvate dehydrogenase kinase, isoenzyme 4 [Source:MGI Symbol;Acc:MGI:1351481]
ENSMUSG00000092086	Gm6793	67.7458	82.2146	72.2766	92.4233	116.653	92.2587	8	112013433	112015036	-	1604	protein_coding	predicted gene 6793 [Source:MGI Symbol;Acc:MGI:3643578]
ENSMUSG00000020153	Ndufs7	105.724	89.7423	102.902	72.3536	65.5481	87.1792	10	80249121	80256794	+	1718	protein_coding	NADH dehydrogenase (ubiquinone) Fe-S protein 7 [Source:MGI Symbol;Acc:MGI:1922656]
ENSMUSG00000021876	Rnase4	81.4473	79.1575	70.357	107.454	88.5022	95.9873	14	51091077	51106151	+	1996	protein_coding	ribonuclease, RNase A family 4 [Source:MGI Symbol;Acc:MGI:1926217]
ENSMUSG00000059895	Ptp4a3	131.287	95.5146	105.754	76.9536	53.8227	58.5843	15	73723145	73758766	+	4619	protein_coding	protein tyrosine phosphatase 4a3 [Source:MGI Symbol;Acc:MGI:1277098]
ENSMUSG00000021178	Psmc1	84.522	90.3608	83.0581	84.2433	91.9597	86.2091	12	100110154	100123405	+	1933	protein_coding	protease (prosome, macropain) 26S subunit, ATPase 1 [Source:MGI Symbol;Acc:MGI:106054]
ENSMUSG00000071866	Ppia	58.1259	97.5673	61.0845	99.1003	108.864	92.3356	11	6415443	6419817	+	3508	protein_coding	peptidylprolyl isomerase A [Source:MGI Symbol;Acc:MGI:97749]
ENSMUSG00000050953	Gja1	54.9462	76.4237	71.1564	107.389	126.516	80.4497	10	56377330	56402513	+	10257	protein_coding	gap junction protein, alpha 1 [Source:MGI Symbol;Acc:MGI:95713]
ENSMUSG00000036880	Acaa2	111.369	125.349	111.595	64.0322	41.5929	62.2965	18	74779197	74806207	+	1515	protein_coding	acetyl-Coenzyme A acyltransferase 2 (mitochondrial 3-oxoacyl-Coenzyme A thiolase) [Source:MGI Symbol;Acc:MGI:1098623]
ENSMUSG00000090877	Hspa1b	87.7064	65.978	71.6868	61.8398	139.933	88.6793	17	34956436	34959238	-	2803	protein_coding	heat shock protein 1B [Source:MGI Symbol;Acc:MGI:99517]
ENSMUSG00000069372	Ctxn3	139.216	116.624	113.126	57.9964	41.3565	44.2192	18	57468516	57478133	+	1605	protein_coding	cortexin 3 [Source:MGI Symbol;Acc:MGI:3642816]
ENSMUSG00000096210	H1f0	73.7755	80.8642	78.2148	78.7229	102.821	96.5584	15	79028212	79030498	+	2287	protein_coding	H1 histone family, member 0 [Source:MGI Symbol;Acc:MGI:95893]
ENSMUSG00000021091	Serpina3n	15.0569	18.42	14.6453	233.869	122.516	105.941	12	104406729	104414329	+	2064	protein_coding	serine (or cysteine) peptidase inhibitor, clade A, member 3N [Source:MGI Symbol;Acc:MGI:105045]
ENSMUSG00000049134	Nrap	109.916	86.4269	104.508	71.9594	60.1098	77.4615	19	56320035	56390037	-	5507	protein_coding	nebulin-related anchoring protein [Source:MGI Symbol;Acc:MGI:1098765]
ENSMUSG00000022468	Endou	31.172	50.5741	42.9831	98.6375	194.963	91.8203	15	97711019	97731405	-	2718	protein_coding	endonuclease, polyU-specific [Source:MGI Symbol;Acc:MGI:97746]
ENSMUSG00000049173	Myoz3	144.605	104.638	121.177	46.3756	35.0828	55.8686	18	60576316	60591788	-	870	protein_coding	myozenin 3 [Source:MGI Symbol;Acc:MGI:2179296]
ENSMUSG00000015093	Clic3	75.9487	126.674	112.589	74.8567	65.6307	48.7702	2	25456838	25458776	+	1012	protein_coding	chloride intracellular channel 3 [Source:MGI Symbol;Acc:MGI:1916704]
ENSMUSG00000025064	Col17a1	31.0022	45.5256	44.4777	88.2892	188.064	106.354	19	47646344	47692094	-	5765	protein_coding	collagen, type XVII, alpha 1 [Source:MGI Symbol;Acc:MGI:88450]
ENSMUSG00000037916	Ndufv1	91.3959	86.4878	89.8394	69.5443	79.3797	86.7532	19	4007497	4012806	-	2521	protein_coding	NADH dehydrogenase (ubiquinone) flavoprotein 1 [Source:MGI Symbol;Acc:MGI:107851]
ENSMUSG00000036427	Gpi1	89.8347	87.7595	88.1282	74.569	78.6214	84.4622	7	34201330	34230336	-	6452	protein_coding	glucose phosphate isomerase 1 [Source:MGI Symbol;Acc:MGI:95797]
ENSMUSG00000042043	Tbca	76.4817	88.0455	70.6763	86.1237	85.2859	96.4475	13	94788910	94842922	+	811	protein_coding	tubulin cofactor A [Source:MGI Symbol;Acc:MGI:107549]
ENSMUSG00000050912	Tmem123	69.408	89.2877	80.6328	94.1608	85.0175	83.3003	9	7764041	7794333	+	3109	protein_coding	transmembrane protein 123 [Source:MGI Symbol;Acc:MGI:1919179]
ENSMUSG00000068699	Flnc	114.271	78.5475	103.427	66.086	58.6828	79.5481	6	29433256	29461883	+	9402	protein_coding	filamin C, gamma [Source:MGI Symbol;Acc:MGI:95557]
ENSMUSG00000030747	Dgat2	86.7568	102.729	113.247	69.3532	62.8471	65.5622	7	99153658	99182719	-	3083	protein_coding	diacylglycerol O-acyltransferase 2 [Source:MGI Symbol;Acc:MGI:1915050]
ENSMUSG00000004980	Hnrnpa2b1	90.6437	78.1799	85.5671	81.2715	86.6781	77.7208	6	51460932	51469894	-	6584	protein_coding	heterogeneous nuclear ribonucleoprotein A2/B1 [Source:MGI Symbol;Acc:MGI:104819]
ENSMUSG00000006998	Psmd2	78.3705	83.1645	83.1707	81.0262	91.8017	81.619	16	20651652	20663414	+	4038	protein_coding	proteasome (prosome, macropain) 26S subunit, non-ATPase, 2 [Source:MGI Symbol;Acc:MGI:1096584]
ENSMUSG00000022425	Enpp2	114.322	115.865	112.732	58.2641	40.5281	57.3844	15	54838898	54920146	-	3473	protein_coding	ectonucleotide pyrophosphatase/phosphodiesterase 2 [Source:MGI Symbol;Acc:MGI:1321390]
ENSMUSG00000019804	Snx3	95.7508	79.7732	97.5183	71.2758	75.1966	76.5502	10	42502030	42535381	+	1413	protein_coding	sorting nexin 3 [Source:MGI Symbol;Acc:MGI:1860188]
ENSMUSG00000022285	Ywhaz	65.0139	72.0438	70.7569	94.3646	113.594	79.6446	15	36770770	36794547	-	3999	protein_coding	tyrosine 3-monooxygenase/tryptophan 5-monooxygenase activation protein, zeta polypeptide [Source:MGI Symbol;Acc:MGI:109484]
ENSMUSG00000036446	Lum	97.2471	110.236	80.5366	88.9643	46.2696	70.3356	10	97565128	97572703	+	2448	protein_coding	lumican [Source:MGI Symbol;Acc:MGI:109347]
ENSMUSG00000000308	Ckmt1	52.4582	73.7869	65.9794	93.1716	114.214	92.7283	2	121357714	121363737	+	2496	protein_coding	creatine kinase, mitochondrial 1, ubiquitous [Source:MGI Symbol;Acc:MGI:99441]
ENSMUSG00000020358	Hnrnpab	71.6812	75.8672	68.5047	76.5083	112.647	86.549	11	51600100	51606847	-	2782	protein_coding	heterogeneous nuclear ribonucleoprotein A/B [Source:MGI Symbol;Acc:MGI:1330294]
ENSMUSG00000073676	Hspe1	82.3339	72.3566	76.7929	72.7236	90.4259	96.6091	1	55088132	55091307	+	1474	protein_coding	heat shock protein 1 (chaperonin 10) [Source:MGI Symbol;Acc:MGI:104680]
ENSMUSG00000023048	Prr13	40.2845	50.7897	51.7117	107.951	124.333	114.231	15	102459028	102462806	+	1562	protein_coding	proline rich 13 [Source:MGI Symbol;Acc:MGI:1913401]
ENSMUSG00000049593	Lce1h	68.8441	140.04	110.319	76.2604	33.2959	59.9384	3	92763215	92765065	-	706	protein_coding	late cornified envelope 1H [Source:MGI Symbol;Acc:MGI:1914968]
ENSMUSG00000054312	Mrps21	97.5268	89.1265	87.0637	70.4086	65.7276	78.7351	3	95862634	95871519	-	739	protein_coding	mitochondrial ribosomal protein S21 [Source:MGI Symbol;Acc:MGI:1913542]
ENSMUSG00000024870	Rab1b	80.6263	84.2286	80.6008	76.8957	83.4123	81.598	19	5099207	5106996	-	1835	protein_coding	RAB1B, member RAS oncogene family [Source:MGI Symbol;Acc:MGI:1923558]
ENSMUSG00000022947	Cbr3	61.0522	77.9304	69.0799	88.7551	103.963	86.2193	16	93683215	93690990	+	1170	protein_coding	carbonyl reductase 3 [Source:MGI Symbol;Acc:MGI:1309992]
ENSMUSG00000000171	Sdhd	90.183	81.6347	84.5488	68.2378	73.5504	87.7664	9	50596357	50603812	-	1231	protein_coding	succinate dehydrogenase complex, subunit D, integral membrane protein [Source:MGI Symbol;Acc:MGI:1914175]
ENSMUSG00000006221	Hspb7	107.741	78.3105	93.1952	59.3187	70.1368	76.5165	4	141420779	141425311	+	2769	protein_coding	heat shock protein family, member 7 (cardiovascular) [Source:MGI Symbol;Acc:MGI:1352494]
ENSMUSG00000021996	Esd	40.6013	55.9925	40.5226	104.395	146.473	97.1465	14	74732297	74750765	+	3366	protein_coding	esterase D/formylglutathione hydrolase [Source:MGI Symbol;Acc:MGI:95421]
ENSMUSG00000048277	Syngr2	82.4864	77.1838	85.8581	69.3452	87.6385	82.245	11	117809668	117814283	+	1776	protein_coding	synaptogyrin 2 [Source:MGI Symbol;Acc:MGI:1328324]
ENSMUSG00000005779	Psmb4	73.5319	79.5144	72.2096	84.6188	87.7049	87.0789	3	94884093	94886961	-	1951	protein_coding	proteasome (prosome, macropain) subunit, beta type 4 [Source:MGI Symbol;Acc:MGI:1098257]
ENSMUSG00000047187	Rab2a	81.8476	87.1055	80.3131	82.3807	78.5673	73.2636	4	8535644	8607778	+	2133	protein_coding	RAB2A, member RAS oncogene family [Source:MGI Symbol;Acc:MGI:1928750]
ENSMUSG00000038239	Hrc	128.976	93.6078	108.797	53.0651	37.443	61.2578	7	45335290	45338974	+	2566	protein_coding	histidine rich calcium binding protein [Source:MGI Symbol;Acc:MGI:96226]
ENSMUSG00000052397	Ezr	63.5366	77.4072	76.9233	83.606	104.855	75.8817	17	6738041	6782784	-	3290	protein_coding	ezrin [Source:MGI Symbol;Acc:MGI:98931]
ENSMUSG00000091478	Gm10039	85.8071	80.65	74.0318	67.698	74.5623	98.9064	11	100361716	100362126	-	411	processed_pseudogene	predicted pseudogene 10039 [Source:MGI Symbol;Acc:MGI:3704382]
ENSMUSG00000025630	Hprt	75.6124	91.7084	76.1856	81.348	81.603	73.5744	X	52988137	53021659	+	1289	protein_coding	hypoxanthine guanine phosphoribosyl transferase [Source:MGI Symbol;Acc:MGI:96217]
ENSMUSG00000056737	Capg	44.6069	61.4359	53.6583	85.7139	130.486	103.08	6	72544391	72562983	+	2529	protein_coding	capping protein (actin filament), gelsolin-like [Source:MGI Symbol;Acc:MGI:1098259]
ENSMUSG00000005161	Prdx2	75.3338	92.6592	81.7354	78.3154	73.8033	76.6772	8	84969587	84974834	+	3050	protein_coding	peroxiredoxin 2 [Source:MGI Symbol;Acc:MGI:109486]
ENSMUSG00000025980	Hspd1	90.1873	72.9092	85.1217	62.7209	84.269	82.8904	1	55077835	55088243	-	2642	protein_coding	heat shock protein 1 (chaperonin) [Source:MGI Symbol;Acc:MGI:96242]
ENSMUSG00000080893	Gm15920	87.9408	74.3764	63.3015	74.9174	81.4362	95.9404	5	130188395	130188796	+	402	processed_pseudogene	predicted gene 15920 [Source:MGI Symbol;Acc:MGI:3801934]
ENSMUSG00000086583	Gm15500	59.6955	89.9003	75.5535	102.426	69.5681	80.5209	7	114705217	114706235	-	1019	transcribed_processed_pseudogene	predicted pseudogene 15500 [Source:MGI Symbol;Acc:MGI:3782947]
ENSMUSG00000029467	Atp2a2	83.4564	62.6387	72.5731	89.9301	81.104	87.9235	5	122453513	122502225	-	6081	protein_coding	ATPase, Ca++ transporting, cardiac muscle, slow twitch 2 [Source:MGI Symbol;Acc:MGI:88110]
ENSMUSG00000057522	Spop	90.0418	80.5113	84.5429	77.3021	70.4776	74.3611	11	95414080	95493406	+	3159	protein_coding	speckle-type POZ protein [Source:MGI Symbol;Acc:MGI:1343085]
ENSMUSG00000028452	Vcp	84.1468	77.8516	85.0512	75.4185	83.7906	70.9538	4	42979963	43000507	-	4851	protein_coding	valosin containing protein [Source:MGI Symbol;Acc:MGI:99919]
ENSMUSG00000028745	Capzb	77.2799	76.2549	75.4303	79.6622	81.5511	85.6485	4	139192899	139291818	+	3299	protein_coding	capping protein (actin filament) muscle Z-line, beta [Source:MGI Symbol;Acc:MGI:104652]
ENSMUSG00000032033	Barx2	90.8385	91.2293	104.254	57.404	75.0235	56.6552	9	31846044	31913462	-	1968	protein_coding	BarH-like homeobox 2 [Source:MGI Symbol;Acc:MGI:109617]
ENSMUSG00000029432	Nipsnap2	121.03	87.7267	98.7646	57.612	45.3355	64.8379	5	129725063	129758327	+	2750	protein_coding	nipsnap homolog 2 [Source:MGI Symbol;Acc:MGI:1278343]
ENSMUSG00000078144	Capns2	72.9047	93.9567	88.8451	82.4421	78.9054	57.9786	8	92901407	92902411	+	1005	protein_coding	calpain, small subunit 2 [Source:MGI Symbol;Acc:MGI:1916793]
ENSMUSG00000028063	Lmna	67.0502	71.6028	69.691	81.7319	101.113	83.5571	3	88480147	88509956	-	5838	protein_coding	lamin A [Source:MGI Symbol;Acc:MGI:96794]
ENSMUSG00000028716	Pdzk1ip1	59.433	78.0371	74.026	81.1961	90.078	91.7802	4	115088708	115093899	+	1778	protein_coding	PDZK1 interacting protein 1 [Source:MGI Symbol;Acc:MGI:1914432]
ENSMUSG00000030934	Oat	89.7698	84.5153	89.1736	80.9776	60.7194	69.2698	7	132557478	132576398	-	2360	protein_coding	ornithine aminotransferase [Source:MGI Symbol;Acc:MGI:97394]
ENSMUSG00000007836	Hnrnpa0	56.1241	67.5773	64.136	71.3784	116.915	95.5403	13	58125879	58128556	-	2678	protein_coding	heterogeneous nuclear ribonucleoprotein A0 [Source:MGI Symbol;Acc:MGI:1924384]
ENSMUSG00000028964	Park7	90.8924	81.8455	85.6765	70.3135	64.54	78.1759	4	150897133	150914437	-	2479	protein_coding	Parkinson disease (autosomal recessive, early onset) 7 [Source:MGI Symbol;Acc:MGI:2135637]
ENSMUSG00000031613	Hpgd	65.0992	91.2113	88.7384	67.7274	82.5848	74.7871	8	56294585	56321043	+	1683	protein_coding	hydroxyprostaglandin dehydrogenase 15 (NAD) [Source:MGI Symbol;Acc:MGI:108085]
ENSMUSG00000062929	Cfl2	114.041	91.7081	96.4261	61.5654	44.2273	62.0416	12	54858809	54862877	-	3266	protein_coding	cofilin 2, muscle [Source:MGI Symbol;Acc:MGI:101763]
ENSMUSG00000037820	Tgm2	90.2912	83.4703	89.8281	84.3047	52.8561	69.2452	2	158116402	158146436	-	4608	protein_coding	transglutaminase 2, C polypeptide [Source:MGI Symbol;Acc:MGI:98731]
ENSMUSG00000020733	Slc9a3r1	57.4704	83.5657	80.1438	74.8582	91.9796	81.3097	11	115163341	115181181	+	1925	protein_coding	solute carrier family 9 (sodium/hydrogen exchanger), member 3 regulator 1 [Source:MGI Symbol;Acc:MGI:1349482]
ENSMUSG00000043483	Gm6863	61.1639	77.1259	72.8973	88.4671	89.3374	79.5675	12	96922423	96923058	-	636	processed_pseudogene	predicted gene 6863 [Source:MGI Symbol;Acc:MGI:3647386]
ENSMUSG00000103653	Gstp-ps	73.1653	84.0196	78.8416	77.3582	91.0205	63.4983	1	192073820	192074450	-	631	processed_pseudogene	glutathione S-transferase, pi, pseudogene [Source:MGI Symbol;Acc:MGI:3782108]
ENSMUSG00000040280	Ndufa4l2	86.0026	133.081	125.429	27.222	33.4188	61.1629	10	127514967	127517154	+	1095	protein_coding	NADH dehydrogenase (ubiquinone) 1 alpha subcomplex, 4-like 2 [Source:MGI Symbol;Acc:MGI:3039567]
ENSMUSG00000044502	Bod1	87.0292	75.0138	88.3596	71.5603	75.6853	68.3022	11	31665181	31671885	-	1644	protein_coding	biorientation of chromosomes in cell division 1 [Source:MGI Symbol;Acc:MGI:1916806]
ENSMUSG00000091498	Mpc1-ps	94.5627	88.433	89.3361	60.9311	58.0555	72.3198	12	110858565	110858894	-	330	processed_pseudogene	mitochondrial pyruvate carrier 1, pseudogene [Source:MGI Symbol;Acc:MGI:3781628]
ENSMUSG00000084093	Gm16418	93.4946	86.8663	69.8931	56.4724	68.1339	87.4409	1	166431705	166431875	-	171	processed_pseudogene	predicted pseudogene 16418 [Source:MGI Symbol;Acc:MGI:3644548]
ENSMUSG00000032314	Etfa	90.9229	88.3671	85.2686	67.2357	59.6025	70.7485	9	55454508	55512243	-	1835	protein_coding	electron transferring flavoprotein, alpha polypeptide [Source:MGI Symbol;Acc:MGI:106092]
ENSMUSG00000096942	Rps19-ps6	65.878	67.718	73.7887	91.7133	81.9549	80.8279	12	110898114	110898551	+	438	processed_pseudogene	ribosomal protein S19, pseudogene 6 [Source:MGI Symbol;Acc:MGI:5011818]
ENSMUSG00000054364	Rhob	76.3778	66.5096	72.0164	78.7476	85.1921	81.6336	12	8497661	8500009	-	2349	protein_coding	ras homolog family member B [Source:MGI Symbol;Acc:MGI:107949]
ENSMUSG00000068888	Lce1i	71.7527	103.627	108.045	74.5571	37.657	64.0421	3	92777210	92778899	-	731	protein_coding	late cornified envelope 1I [Source:MGI Symbol;Acc:MGI:1923835]
ENSMUSG00000037815	Ctnna1	74.1204	80.0777	78.7247	75.5861	77.9661	72.533	18	35118888	35254773	+	3698	protein_coding	catenin (cadherin associated protein), alpha 1 [Source:MGI Symbol;Acc:MGI:88274]
ENSMUSG00000020048	Hsp90b1	78.7097	62.2737	78.9593	93.1548	66.2574	78.7551	10	86690209	86705509	-	4032	protein_coding	heat shock protein 90, beta (Grp94), member 1 [Source:MGI Symbol;Acc:MGI:98817]
ENSMUSG00000068466	Gm5518	73.2909	76.1399	76.9269	77.5063	80.5924	73.5305	19	29160118	29160765	+	648	processed_pseudogene	predicted gene 5518 [Source:MGI Symbol;Acc:MGI:3648673]
ENSMUSG00000021486	Prelid1	51.1057	74.9202	63.4451	83.9679	103.554	80.9015	13	55320500	55325272	+	2726	protein_coding	PRELI domain containing 1 [Source:MGI Symbol;Acc:MGI:1913744]
ENSMUSG00000002102	Psmc3	83.347	76.8743	75.1471	75.4027	71.5367	75.4719	2	91054009	91066369	+	2607	protein_coding	proteasome (prosome, macropain) 26S subunit, ATPase 3 [Source:MGI Symbol;Acc:MGI:1098754]
ENSMUSG00000024190	Dusp1	79.6939	44.3977	53.584	98.0649	94.0653	87.6552	17	26505590	26508519	-	2697	protein_coding	dual specificity phosphatase 1 [Source:MGI Symbol;Acc:MGI:105120]
ENSMUSG00000079037	Prnp	86.5715	82.1115	76.3242	75.8439	69.1442	65.2217	2	131909928	131938429	+	2343	protein_coding	prion protein [Source:MGI Symbol;Acc:MGI:97769]
ENSMUSG00000038539	Atf5	103.812	75.0588	107.344	53.4094	52.819	62.6528	7	44812256	44816658	-	1993	protein_coding	activating transcription factor 5 [Source:MGI Symbol;Acc:MGI:2141857]
ENSMUSG00000076617	Ighm	4.8278	9.19289	27.3814	194.429	72.9344	145.533	12	113418558	113422730	-	1886	IG_C_gene	immunoglobulin heavy constant mu [Source:MGI Symbol;Acc:MGI:96448]
ENSMUSG00000102308	2310046K23Rik	0.126285	2.89256	0.514907	87.5384	177.671	184.503	3	92532505	92534511	-	677	protein_coding	RIKEN cDNA 2310046K23 gene [Source:MGI Symbol;Acc:MGI:1924218]
ENSMUSG00000032262	Elovl4	60.7591	76.0948	78.5656	80.6706	91.7826	64.182	9	83778692	83806277	-	3026	protein_coding	elongation of very long chain fatty acids (FEN1/Elo2, SUR4/Elo3, yeast)-like 4 [Source:MGI Symbol;Acc:MGI:1933331]
ENSMUSG00000029430	Ran	68.661	69.261	65.3821	74.0581	97.8008	75.9493	5	129020069	129024323	+	2646	protein_coding	RAN, member RAS oncogene family [Source:MGI Symbol;Acc:MGI:1333112]
ENSMUSG00000040666	Sh3bgr	129.518	93.14	109.125	39.2622	31.2604	48.5108	16	96200470	96228933	+	1542	protein_coding	SH3-binding domain glutamic acid-rich protein [Source:MGI Symbol;Acc:MGI:1354740]
ENSMUSG00000022123	Scel	93.8821	115.675	121.341	48.1823	31.0941	40.1768	14	103513341	103613346	+	3053	protein_coding	sciellin [Source:MGI Symbol;Acc:MGI:1891228]
ENSMUSG00000019370	Calm3	85.2481	80.5043	83.0117	67.0431	57.4136	76.7855	7	16915379	16924114	-	2423	protein_coding	calmodulin 3 [Source:MGI Symbol;Acc:MGI:103249]
ENSMUSG00000026193	Fn1	71.619	63.8632	55.6502	101.956	72.2919	84.113	1	71585520	71653200	-	11685	protein_coding	fibronectin 1 [Source:MGI Symbol;Acc:MGI:95566]
ENSMUSG00000036896	C1qc	48.8796	65.2004	43.8415	95.6112	82.5584	111.103	4	136889804	136893065	-	1931	protein_coding	complement component 1, q subcomponent, C chain [Source:MGI Symbol;Acc:MGI:88225]
ENSMUSG00000023010	Tmbim6	75.7011	77.9058	80.2067	66.6405	70.914	73.5717	15	99392882	99410049	+	3806	protein_coding	transmembrane BAX inhibitor motif containing 6 [Source:MGI Symbol;Acc:MGI:99682]
ENSMUSG00000020612	Prkar1a	84.8223	74.8216	75.4877	69.0048	66.0224	74.4228	11	109649405	109669656	+	4321	protein_coding	protein kinase, cAMP dependent regulatory, type I, alpha [Source:MGI Symbol;Acc:MGI:104878]
ENSMUSG00000001119	Col6a1	85.4951	88.2516	87.5345	66.4544	53.7811	63.0172	10	76708792	76726168	-	4380	protein_coding	collagen, type VI, alpha 1 [Source:MGI Symbol;Acc:MGI:88459]
ENSMUSG00000018286	Psmb6	74.2601	77.3589	69.4842	71.3244	75.4522	76.2918	11	70525367	70527858	+	1872	protein_coding	proteasome (prosome, macropain) subunit, beta type 6 [Source:MGI Symbol;Acc:MGI:104880]
ENSMUSG00000036181	Hist1h1c	76.9181	85.8806	75.4963	72.2195	71.398	61.781	13	23738808	23740367	+	1560	protein_coding	histone cluster 1, H1c [Source:MGI Symbol;Acc:MGI:1931526]
ENSMUSG00000067616	Klk11	57.6669	83.1855	73.7647	75.6556	89.9346	61.9216	7	43774604	43779263	+	1467	protein_coding	kallikrein related-peptidase 11 [Source:MGI Symbol;Acc:MGI:1929977]
ENSMUSG00000059734	Ndufs8	79.9019	80.0009	76.0686	64.8831	60.8761	79.9267	19	3908870	3912717	-	963	protein_coding	NADH dehydrogenase (ubiquinone) Fe-S protein 8 [Source:MGI Symbol;Acc:MGI:2385079]
ENSMUSG00000042828	Trim72	99.623	77.4082	86.596	71.6023	42.5859	63.8088	7	128003949	128011033	+	2233	protein_coding	tripartite motif-containing 72 [Source:MGI Symbol;Acc:MGI:3612190]
ENSMUSG00000005610	Eif4g2	80.3776	76.746	79.3568	73.4336	68.437	62.4588	7	111067750	111083030	-	10166	protein_coding	eukaryotic translation initiation factor 4, gamma 2 [Source:MGI Symbol;Acc:MGI:109207]
ENSMUSG00000022283	Pabpc1	50.67	64.481	57.7849	74.5974	108.002	84.9466	15	36595661	36608973	-	5768	protein_coding	poly(A) binding protein, cytoplasmic 1 [Source:MGI Symbol;Acc:MGI:1349722]
ENSMUSG00000039067	Psmd7	77.2329	76.6819	77.8809	69.4285	70.5632	67.1634	8	107580381	107588464	-	2261	protein_coding	proteasome (prosome, macropain) 26S subunit, non-ATPase, 7 [Source:MGI Symbol;Acc:MGI:1351511]
ENSMUSG00000084111	Gm15710	47.5197	53.7703	64.5975	125.213	71.2764	76.3586	5	92140294	92140929	-	636	processed_pseudogene	predicted gene 15710 [Source:MGI Symbol;Acc:MGI:3783151]
ENSMUSG00000031299	Pdha1	93.6691	80.9046	86.3677	60.4268	48.4073	68.5431	X	160122209	160138413	-	3734	protein_coding	pyruvate dehydrogenase E1 alpha 1 [Source:MGI Symbol;Acc:MGI:97532]
ENSMUSG00000024425	Ndfip1	74.5554	71.8492	69.0758	74.1078	73.4467	75.0598	18	38418975	38464399	+	930	protein_coding	Nedd4 family interacting protein 1 [Source:MGI Symbol;Acc:MGI:1929601]
ENSMUSG00000002980	Bcam	80.925	83.1327	88.1715	75.1363	46.5771	62.5468	7	19756131	19771016	-	3199	protein_coding	basal cell adhesion molecule [Source:MGI Symbol;Acc:MGI:1929940]
ENSMUSG00000101188	Eif4a-ps4	53.6274	67.0165	59.2843	87.3571	88.6164	79.1968	1	60703932	60705149	+	1218	processed_pseudogene	eukaryotic translation initiation factor 4A, pseudogene 4 [Source:MGI Symbol;Acc:MGI:1195958]
ENSMUSG00000030884	Uqcrc2	80.2856	81.5631	75.2836	66.3669	58.7071	72.088	7	120635176	120659524	+	2552	protein_coding	ubiquinol cytochrome c reductase core protein 2 [Source:MGI Symbol;Acc:MGI:1914253]
ENSMUSG00000031848	Lsm4	61.8562	68.4228	67.5498	71.6648	86.3169	73.9511	8	70673248	70678752	+	1038	protein_coding	LSM4 homolog, U6 small nuclear RNA and mRNA degradation associated [Source:MGI Symbol;Acc:MGI:1354692]
ENSMUSG00000054046	Klk13	36.8853	59.49	58.2757	68.11	114.018	92.7654	7	43712567	43727534	+	2297	protein_coding	kallikrein related-peptidase 13 [Source:MGI Symbol;Acc:MGI:3615275]
ENSMUSG00000030433	Sbk2	110.312	115.012	102.731	45.7342	24.3382	31.3666	7	4940512	4964406	-	3147	protein_coding	SH3-binding domain kinase family, member 2 [Source:MGI Symbol;Acc:MGI:2685925]
ENSMUSG00000062077	Trim54	118.806	83.4513	90.5118	49.4378	35.7105	50.7865	5	31116712	31137630	+	1436	protein_coding	tripartite motif-containing 54 [Source:MGI Symbol;Acc:MGI:1889623]
ENSMUSG00000047884	Klk9	29.6568	58.1499	50.676	72.1172	128.826	88.6335	7	43791891	43796757	+	1476	protein_coding	kallikrein related-peptidase 9 [Source:MGI Symbol;Acc:MGI:1921082]
ENSMUSG00000020496	Rnf187	75.8664	67.637	71.4405	61.7871	71.2715	79.6674	11	58932288	58938916	-	1949	protein_coding	ring finger protein 187 [Source:MGI Symbol;Acc:MGI:1914224]
ENSMUSG00000020737	Jpt1	76.0265	90.8354	80.897	64.6547	56.3535	58.3761	11	115497353	115514387	-	2149	protein_coding	Jupiter microtubule associated homolog 1 [Source:MGI Symbol;Acc:MGI:1096361]
ENSMUSG00000022820	Ndufb4	87.3949	84.2988	76.9966	52.7631	53.4718	70.6628	16	37647170	37654453	-	1170	protein_coding	NADH dehydrogenase (ubiquinone) 1 beta subcomplex 4 [Source:MGI Symbol;Acc:MGI:1915444]
ENSMUSG00000024099	Ndufv2	92.3046	80.5242	76.8253	56.6143	52.7749	66.2426	17	66078795	66101559	-	1990	protein_coding	NADH dehydrogenase (ubiquinone) flavoprotein 2 [Source:MGI Symbol;Acc:MGI:1920150]
ENSMUSG00000061904	Slc25a3	76.3679	66.2134	70.167	69.7176	72.1288	70.5126	10	91116574	91124059	-	5550	protein_coding	solute carrier family 25 (mitochondrial carrier, phosphate carrier), member 3 [Source:MGI Symbol;Acc:MGI:1353498]
ENSMUSG00000022519	Srl	109.65	81.1379	90.5918	47.1505	38.089	58.0912	16	4480216	4541816	-	5325	protein_coding	sarcalumenin [Source:MGI Symbol;Acc:MGI:2146620]
ENSMUSG00000030208	Emp1	65.9327	101.545	82.1701	71.4136	53.9986	48.3871	6	135362545	135383173	+	5935	protein_coding	epithelial membrane protein 1 [Source:MGI Symbol;Acc:MGI:107941]
ENSMUSG00000031839	Hsbp1	75.1355	79.433	72.3033	66.9361	60.5113	68.932	8	119344488	119348922	+	1861	protein_coding	heat shock factor binding protein 1 [Source:MGI Symbol;Acc:MGI:1915446]
ENSMUSG00000039323	Igfbp2	36.0357	44.0904	38.6635	65.6529	173.781	64.4483	1	72824503	72852474	+	1847	protein_coding	insulin-like growth factor binding protein 2 [Source:MGI Symbol;Acc:MGI:96437]
ENSMUSG00000065947	mt-Nd4l	101.327	121.577	57.3441	66.662	24.8632	50.7655	MT	9877	10173	+	297	protein_coding	mitochondrially encoded NADH dehydrogenase 4L [Source:MGI Symbol;Acc:MGI:102497]
ENSMUSG00000056076	Eif3b	57.0052	58.5968	60.6635	69.2129	95.9399	80.8356	5	140419328	140443360	+	3346	protein_coding	eukaryotic translation initiation factor 3, subunit B [Source:MGI Symbol;Acc:MGI:106478]
ENSMUSG00000028786	Tmem54	65.4156	99.7071	90.0209	59.0698	60.4621	47.4784	4	129105548	129111626	+	1222	protein_coding	transmembrane protein 54 [Source:MGI Symbol;Acc:MGI:1913510]
ENSMUSG00000030095	Tmem43	73.821	71.1088	68.7006	70.4319	78.5997	58.7694	6	91473703	91488463	+	3973	protein_coding	transmembrane protein 43 [Source:MGI Symbol;Acc:MGI:1921372]
ENSMUSG00000024942	Capn1	63.9605	73.7249	73.6523	65.4235	81.0454	63.5589	19	5988546	6015825	-	3190	protein_coding	calpain 1 [Source:MGI Symbol;Acc:MGI:88263]
ENSMUSG00000056999	Ide	62.3778	131.082	76.0623	63.7002	49.0417	38.46	19	37268743	37337852	-	5823	protein_coding	insulin degrading enzyme [Source:MGI Symbol;Acc:MGI:96412]
ENSMUSG00000020483	Dynll2	92.3853	68.2047	74.316	55.457	59.0923	70.9088	11	87979525	87987533	-	2736	protein_coding	dynein light chain LC8-type 2 [Source:MGI Symbol;Acc:MGI:1915347]
ENSMUSG00000000346	Dazap2	55.0848	66.6216	59.944	77.323	83.6212	74.1537	15	100615628	100620731	+	1826	protein_coding	DAZ associated protein 2 [Source:MGI Symbol;Acc:MGI:1344344]
ENSMUSG00000041782	Lad1	65.4289	82.0672	78.1109	59.3984	75.6536	55.7499	1	135818598	135833342	+	3400	protein_coding	ladinin [Source:MGI Symbol;Acc:MGI:109343]
ENSMUSG00000040562	Gstm2	79.2828	111.91	100.962	46.1434	37.0416	40.7075	3	107981702	107986453	-	1679	protein_coding	glutathione S-transferase, mu 2 [Source:MGI Symbol;Acc:MGI:95861]
ENSMUSG00000021917	Spcs1	63.8448	73.3784	63.6731	67.6999	72.415	74.3486	14	30999827	31001666	-	1005	protein_coding	signal peptidase complex subunit 1 homolog (S. cerevisiae) [Source:MGI Symbol;Acc:MGI:1916269]
ENSMUSG00000019173	Rab5c	54.243	62.5005	57.9473	77.9197	87.7515	74.7576	11	100715009	100738215	-	2194	protein_coding	RAB5C, member RAS oncogene family [Source:MGI Symbol;Acc:MGI:105306]
ENSMUSG00000053898	Ech1	94.8157	82.476	83.5504	52.0683	36.5159	64.4994	7	28825217	28832247	+	2284	protein_coding	enoyl coenzyme A hydratase 1, peroxisomal [Source:MGI Symbol;Acc:MGI:1858208]
ENSMUSG00000022234	Cct5	67.0508	70.0879	68.5199	63.717	74.9215	69.4663	15	31590800	31601847	-	2809	protein_coding	chaperonin containing Tcp1, subunit 5 (epsilon) [Source:MGI Symbol;Acc:MGI:107185]
ENSMUSG00000006777	Krt23	66.6206	102.666	102.875	70.4391	24.4048	46.7333	11	99477974	99493137	-	1565	protein_coding	keratin 23 [Source:MGI Symbol;Acc:MGI:2148866]
ENSMUSG00000019987	Arg1	16.2126	29.0691	22.4408	130.048	109.281	106.612	10	24915221	24927484	-	2228	protein_coding	arginase, liver [Source:MGI Symbol;Acc:MGI:88070]
ENSMUSG00000028645	Slc2a1	16.5698	26.4424	19.8854	79.8764	171.048	99.7417	4	119108711	119137983	+	3506	protein_coding	solute carrier family 2 (facilitated glucose transporter), member 1 [Source:MGI Symbol;Acc:MGI:95755]
ENSMUSG00000005683	Cs	81.0642	76.0778	80.5364	55.6546	55.6479	64.1004	10	128337734	128362479	+	5779	protein_coding	citrate synthase [Source:MGI Symbol;Acc:MGI:88529]
ENSMUSG00000034957	Cebpa	43.2827	56.7134	59.2069	69.421	95.5106	87.5032	7	35119293	35121928	+	2636	protein_coding	CCAAT/enhancer binding protein (C/EBP), alpha [Source:MGI Symbol;Acc:MGI:99480]
ENSMUSG00000059058	Tma7-ps	73.6573	66.8675	65.3769	56.758	72.5814	76.2518	1	171711088	171711282	+	195	processed_pseudogene	translational machinery associated 7 homolog (S. cerevisiae), pseudogene [Source:MGI Symbol;Acc:MGI:3705453]
ENSMUSG00000024359	Hspa9	75.4279	66.0804	70.1768	61.6566	71.1769	66.9135	18	34937414	34954357	-	3932	protein_coding	heat shock protein 9 [Source:MGI Symbol;Acc:MGI:96245]
ENSMUSG00000061928	Dsg1b	40.9039	62.0491	61.1276	87.8339	104.997	54.266	18	20376729	20410196	+	3965	protein_coding	desmoglein 1 beta [Source:MGI Symbol;Acc:MGI:2664357]
ENSMUSG00000024096	Ralbp1	56.5431	65.5453	65.376	72.1284	88.143	63.1814	17	65848433	65885755	-	4335	protein_coding	ralA binding protein 1 [Source:MGI Symbol;Acc:MGI:108466]
ENSMUSG00000021124	Vti1b	69.3189	74.3993	69.9717	67.1544	61.0274	69.0121	12	79156017	79172667	-	1612	protein_coding	vesicle transport through interaction with t-SNAREs 1B [Source:MGI Symbol;Acc:MGI:1855688]
ENSMUSG00000025228	Actr1a	65.54	73.3508	70.5392	64.8237	71.2015	64.8144	19	46376814	46395735	-	2742	protein_coding	ARP1 actin-related protein 1A, centractin alpha [Source:MGI Symbol;Acc:MGI:1858964]
ENSMUSG00000020458	Rtn4	79.5577	75.9991	77.7719	59.0749	54.8203	63.0263	11	29692947	29744331	+	6991	protein_coding	reticulon 4 [Source:MGI Symbol;Acc:MGI:1915835]
ENSMUSG00000024026	Glo1	49.5518	59.9314	55.3578	82.47	88.5785	73.1837	17	30592866	30612659	-	1935	protein_coding	glyoxalase 1 [Source:MGI Symbol;Acc:MGI:95742]
ENSMUSG00000102824	Pdcd5-ps	85.8317	73.5868	73.7179	57.4044	51.8995	66.356	1	189277443	189277823	-	381	processed_pseudogene	programmed cell death 5, pseudogene [Source:MGI Symbol;Acc:MGI:3782009]
ENSMUSG00000024331	Dsc2	22.439	55.5012	39.7107	90.5462	132.666	67.7278	18	20030633	20059554	-	5277	protein_coding	desmocollin 2 [Source:MGI Symbol;Acc:MGI:103221]
ENSMUSG00000041028	Ghitm	77.3006	71.2877	69.7793	63.0782	59.1881	67.687	14	37120092	37135272	-	3756	protein_coding	growth hormone inducible transmembrane protein [Source:MGI Symbol;Acc:MGI:1913342]
ENSMUSG00000046203	Sprr2g	0.459651	1.46736	0.382479	91.7119	192.266	121.432	3	92373915	92375229	+	651	polymorphic_pseudogene	small proline-rich protein 2G [Source:MGI Symbol;Acc:MGI:1330348]
ENSMUSG00000001506	Col1a1	51.1824	65.5852	56.3319	91.9522	75.4164	67.1428	11	94936224	94953042	+	6563	protein_coding	collagen, type I, alpha 1 [Source:MGI Symbol;Acc:MGI:88467]
ENSMUSG00000002500	Rpl3l	118.226	95.4668	91.808	36.8218	29.139	35.8196	17	24727820	24736143	+	1643	protein_coding	ribosomal protein L3-like [Source:MGI Symbol;Acc:MGI:1913461]
ENSMUSG00000024991	Eif3a	59.5377	68.0357	64.0092	68.7406	77.4594	68.5666	19	60761116	60790693	-	5176	protein_coding	eukaryotic translation initiation factor 3, subunit A [Source:MGI Symbol;Acc:MGI:95301]
ENSMUSG00000020571	Pdia6	59.1617	52.188	62.2186	84.7752	69.0018	77.9175	12	17266545	17284770	+	3745	protein_coding	protein disulfide isomerase associated 6 [Source:MGI Symbol;Acc:MGI:1919103]
ENSMUSG00000068267	Cenpb	71.8641	64.6934	71.7017	55.466	65.5078	75.7903	2	131175182	131180067	-	4886	protein_coding	centromere protein B [Source:MGI Symbol;Acc:MGI:88376]
ENSMUSG00000021388	Aspn	116.602	75.2553	79.9447	49.7519	32.0491	51.3815	13	49544443	49567565	+	2354	protein_coding	asporin [Source:MGI Symbol;Acc:MGI:1913945]
ENSMUSG00000029390	Tmed2	62.9287	69.8576	65.8401	72.5376	71.1715	62.6153	5	124540695	124550506	+	2527	protein_coding	transmembrane p24 trafficking protein 2 [Source:MGI Symbol;Acc:MGI:1929269]
ENSMUSG00000044734	Serpinb1a	45.2162	64.0013	54.037	83.8817	72.554	85.2354	13	32842092	32851185	-	2303	protein_coding	serine (or cysteine) peptidase inhibitor, clade B, member 1a [Source:MGI Symbol;Acc:MGI:1913472]
ENSMUSG00000016528	Mapkapk2	75.5286	72.2641	75.9346	57.0145	56.8485	67.1114	1	131053700	131097826	-	3041	protein_coding	MAP kinase-activated protein kinase 2 [Source:MGI Symbol;Acc:MGI:109298]
ENSMUSG00000043091	Tuba1c	28.4335	40.0557	36.9524	83.5059	129.007	86.6921	15	99029891	99038105	+	1977	protein_coding	tubulin, alpha 1C [Source:MGI Symbol;Acc:MGI:1095409]
ENSMUSG00000034024	Cct2	60.9365	65.2088	65.8856	68.7721	79.9468	63.0697	10	117051001	117063814	-	2557	protein_coding	chaperonin containing Tcp1, subunit 2 (beta) [Source:MGI Symbol;Acc:MGI:107186]
ENSMUSG00000006373	Pgrmc1	58.8843	70.6021	67.4175	61.5476	83.374	61.8584	X	36598206	36606079	+	1857	protein_coding	progesterone receptor membrane component 1 [Source:MGI Symbol;Acc:MGI:1858305]
ENSMUSG00000061126	Cyp4f39	54.9382	79.186	78.9493	63.8948	77.4047	49.0737	17	32468462	32492479	+	1599	protein_coding	cytochrome P450, family 4, subfamily f, polypeptide 39 [Source:MGI Symbol;Acc:MGI:2445210]
ENSMUSG00000101939	Gm28438	84.5038	74.2049	59.7586	83.4607	36.2678	64.9501	1	24612775	24613119	-	345	unprocessed_pseudogene	predicted gene 28438 [Source:MGI Symbol;Acc:MGI:5579144]
ENSMUSG00000069808	Fam57a	56.8481	109.496	85.4221	50.1675	50.885	50.1879	11	76179671	76214827	+	6615	protein_coding	family with sequence similarity 57, member A [Source:MGI Symbol;Acc:MGI:2151840]
ENSMUSG00000035478	Mbd3	72.5008	63.1224	68.8211	58.2976	70.4246	69.1933	10	80392539	80399550	-	1987	protein_coding	methyl-CpG binding domain protein 3 [Source:MGI Symbol;Acc:MGI:1333812]
ENSMUSG00000086841	2410006H16Rik	48.2992	73.7114	53.0325	77.5001	76.3655	73.2033	11	62602877	62604807	+	462	processed_transcript	RIKEN cDNA 2410006H16 gene [Source:MGI Symbol;Acc:MGI:1916471]
ENSMUSG00000073987	Ggh	82.2971	105.102	93.1859	53.6768	28.4978	38.7039	4	20042052	20066750	+	1965	protein_coding	gamma-glutamyl hydrolase [Source:MGI Symbol;Acc:MGI:1329035]
ENSMUSG00000028998	Tomm7	72.3478	74.7642	63.1228	62.9479	58.0904	70.0833	5	23838944	23844161	-	1125	protein_coding	translocase of outer mitochondrial membrane 7 homolog (yeast) [Source:MGI Symbol;Acc:MGI:1913419]
ENSMUSG00000029030	Tprgl	67.2292	73.4332	71.1888	66.162	59.7249	63.1068	4	154157485	154160666	-	2242	protein_coding	transformation related protein 63 regulated like [Source:MGI Symbol;Acc:MGI:1915058]
ENSMUSG00000059832	Kprp	55.8898	119.467	102.481	48.199	26.9536	47.8313	3	92823074	92827247	-	2729	protein_coding	keratinocyte expressed, proline-rich [Source:MGI Symbol;Acc:MGI:1920981]
ENSMUSG00000025150	Cbr2	52.7338	83.3594	64.0217	50.209	84.3053	64.1858	11	120729489	120732114	-	1327	protein_coding	carbonyl reductase 2 [Source:MGI Symbol;Acc:MGI:107200]
ENSMUSG00000068889	Lce1e	56.155	101.437	85.7296	67.9719	30.6961	56.7051	3	92707401	92709074	-	711	protein_coding	late cornified envelope 1E [Source:MGI Symbol;Acc:MGI:1915944]
ENSMUSG00000004285	Atp6v1f	66.7553	72.9692	64.7431	56.9127	67.499	68.6463	6	29467718	29470512	+	1063	protein_coding	ATPase, H+ transporting, lysosomal V1 subunit F [Source:MGI Symbol;Acc:MGI:1913394]
ENSMUSG00000060373	Hnrnpc	68.2262	60.5147	66.9481	58.7266	65.5473	76.8981	14	52073380	52104028	-	2869	protein_coding	heterogeneous nuclear ribonucleoprotein C [Source:MGI Symbol;Acc:MGI:107795]
ENSMUSG00000034993	Vat1	60.7213	75.8571	71.4755	60.0685	66.0452	61.6771	11	101458745	101466230	-	2766	protein_coding	vesicle amine transport 1 [Source:MGI Symbol;Acc:MGI:1349450]
ENSMUSG00000039263	Npepl1	86.0511	73.1732	77.6051	58.347	40.4632	60.0996	2	174110349	174123070	+	2998	protein_coding	aminopeptidase-like 1 [Source:MGI Symbol;Acc:MGI:2448523]
ENSMUSG00000081684	Rps2-ps13	55.785	64.7122	62.7284	67.5921	80.7462	63.8447	X	52898588	52899469	+	882	processed_pseudogene	ribosomal protein S2, pseudogene 13 [Source:MGI Symbol;Acc:MGI:3705640]
ENSMUSG00000033047	Eif3l	56.8838	64.3646	57.4015	68.9259	80.3581	67.3707	15	79075223	79094400	+	1893	protein_coding	eukaryotic translation initiation factor 3, subunit L [Source:MGI Symbol;Acc:MGI:2386251]
ENSMUSG00000028822	Tmem50a	61.7988	73.4113	65.5227	68.6769	64.2498	61.393	4	134897849	134915024	-	1270	protein_coding	transmembrane protein 50A [Source:MGI Symbol;Acc:MGI:1919067]
ENSMUSG00000020219	Timm13	58.6181	68.7696	63.2383	58.6002	78.368	67.3511	10	80899450	80900969	-	1371	protein_coding	translocase of inner mitochondrial membrane 13 [Source:MGI Symbol;Acc:MGI:1353432]
ENSMUSG00000067847	Romo1	74.1644	76.9826	67.1317	59.6786	56.6212	60.3286	2	156144039	156145797	+	747	protein_coding	reactive oxygen species modulator 1 [Source:MGI Symbol;Acc:MGI:1914317]
ENSMUSG00000034485	Uaca	97.2512	81.3862	85.645	51.6807	32.0734	46.8286	9	60794542	60880370	+	5807	protein_coding	uveal autoantigen with coiled-coil domains and ankyrin repeats [Source:MGI Symbol;Acc:MGI:1919815]
ENSMUSG00000000787	Ddx3x	52.2011	58.9225	48.7041	79.8838	86.5809	67.6647	X	13280970	13294052	+	5277	protein_coding	DEAD/H (Asp-Glu-Ala-Asp/His) box polypeptide 3, X-linked [Source:MGI Symbol;Acc:MGI:103064]
ENSMUSG00000037894	H2afz	45.7562	54.9161	49.7147	67.5327	86.0216	89.8198	3	137864487	137866922	+	1776	protein_coding	H2A histone family, member Z [Source:MGI Symbol;Acc:MGI:1888388]
ENSMUSG00000030738	Eif3c	56.9074	64.1549	60.3798	70.3433	75.3066	66.4196	7	126546455	126566411	-	3511	protein_coding	eukaryotic translation initiation factor 3, subunit C [Source:MGI Symbol;Acc:MGI:1926966]
ENSMUSG00000008475	Arpc5	47.5932	56.6602	49.3175	73.4656	90.3579	75.8706	1	152766542	152775597	+	2276	protein_coding	actin related protein 2/3 complex, subunit 5 [Source:MGI Symbol;Acc:MGI:1915021]
ENSMUSG00000035105	Egln3	70.3038	92.1518	82.2186	44.4096	46.4798	57.4528	12	54178981	54203860	-	2662	protein_coding	egl-9 family hypoxia-inducible factor 3 [Source:MGI Symbol;Acc:MGI:1932288]
ENSMUSG00000025613	Cct8	62.82	64.4515	63.9902	62.1012	74.8214	64.7277	16	87483326	87495873	-	3088	protein_coding	chaperonin containing Tcp1, subunit 8 (theta) [Source:MGI Symbol;Acc:MGI:107183]
ENSMUSG00000063628	Gm7665	36.1267	41.0082	42.7566	81.2118	104.287	87.5074	18	16274648	16274944	-	297	processed_pseudogene	predicted pseudogene 7665 [Source:MGI Symbol;Acc:MGI:3645651]
ENSMUSG00000028333	Anp32b	60.285	55.4167	62.4517	62.5962	82.8853	68.0577	4	46450902	46472657	+	1716	protein_coding	acidic (leucine-rich) nuclear phosphoprotein 32 family, member B [Source:MGI Symbol;Acc:MGI:1914878]
ENSMUSG00000029683	Lmod2	70.1137	62.3861	83.5945	57.0823	54.7267	63.3605	6	24597762	24605414	+	1976	protein_coding	leiomodin 2 (cardiac) [Source:MGI Symbol;Acc:MGI:2135672]
ENSMUSG00000026950	Neb	104.846	69.2414	86.4051	53.23	31.3724	46.1642	2	52136647	52378474	-	26582	protein_coding	nebulin [Source:MGI Symbol;Acc:MGI:97292]
ENSMUSG00000039016	Timm8b	72.5388	67.5867	59.1241	58.8215	60.5068	70.9982	9	50603910	50605320	+	518	protein_coding	translocase of inner mitochondrial membrane 8B [Source:MGI Symbol;Acc:MGI:1353424]
ENSMUSG00000079025	Gsdmc	19.7119	23.5138	18.6771	135.512	81.6391	109	15	63775968	63808759	-	2405	protein_coding	gasdermin C [Source:MGI Symbol;Acc:MGI:1933176]
ENSMUSG00000114003	AC124744.2	57.6353	72.714	58.4706	62.783	65.2396	70.9812	13	3298887	3299667	+	781	processed_pseudogene
ENSMUSG00000036570	Fxyd1	87.5875	73.1513	82.6715	51.639	38.0403	54.6253	7	31051678	31057199	-	2186	protein_coding	FXYD domain-containing ion transport regulator 1 [Source:MGI Symbol;Acc:MGI:1889273]
ENSMUSG00000028478	Clta	59.3003	69.5475	64.3788	63.3986	66.8923	62.7529	4	44004452	44032846	+	1800	protein_coding	clathrin, light polypeptide (Lca) [Source:MGI Symbol;Acc:MGI:894297]
ENSMUSG00000026003	Acadl	76.9669	69.5355	64.8254	53.8815	45.2392	75.4273	1	66830839	66863277	-	2005	protein_coding	acyl-Coenzyme A dehydrogenase, long-chain [Source:MGI Symbol;Acc:MGI:87866]
ENSMUSG00000050762	Prss27	34.4573	57.0253	44.4732	61.4794	102.02	86.0592	17	24038144	24045954	+	1253	protein_coding	protease, serine 27 [Source:MGI Symbol;Acc:MGI:2450123]
ENSMUSG00000000001	Gnai3	55.5246	71.9512	61.7371	67.1426	70.3022	58.6958	3	108107280	108146146	-	3262	protein_coding	guanine nucleotide binding protein (G protein), alpha inhibiting 3 [Source:MGI Symbol;Acc:MGI:95773]
ENSMUSG00000042613	Pbxip1	80.5472	70.2949	74.3466	50.227	43.1395	66.7881	3	89436706	89450952	+	4674	protein_coding	pre B cell leukemia transcription factor interacting protein 1 [Source:MGI Symbol;Acc:MGI:2441670]
ENSMUSG00000028851	Nudc	70.3759	59.6612	70.1727	53.0376	67.7692	64.0389	4	133532542	133545996	-	1425	protein_coding	nudC nuclear distribution protein [Source:MGI Symbol;Acc:MGI:106014]
ENSMUSG00000063065	Mapk3	55.3805	72.141	67.4722	60.2324	65.2535	64.5328	7	126759601	126765819	+	2257	protein_coding	mitogen-activated protein kinase 3 [Source:MGI Symbol;Acc:MGI:1346859]
ENSMUSG00000020307	Cdc34	73.8836	63.9264	69.6613	52.566	57.2043	67.6152	10	79682195	79688398	+	1572	protein_coding	cell division cycle 34 [Source:MGI Symbol;Acc:MGI:102657]
ENSMUSG00000047676	Rpsa-ps10	47.1913	64.6008	55.4258	81.3638	67.7712	68.2874	3	150072658	150073542	-	885	processed_pseudogene	ribosomal protein SA, pseudogene 10 [Source:MGI Symbol;Acc:MGI:3704228]
ENSMUSG00000018927	Ccl6	33.7932	34.8573	26.6056	116.808	81.7514	90.795	11	83587882	83593087	-	1795	protein_coding	chemokine (C-C motif) ligand 6 [Source:MGI Symbol;Acc:MGI:98263]
ENSMUSG00000014606	Slc25a11	76.4011	68.7149	71.6445	55.6178	49.9838	62.0233	11	70644196	70647479	-	2120	protein_coding	solute carrier family 25 (mitochondrial carrier oxoglutarate carrier), member 11 [Source:MGI Symbol;Acc:MGI:1915113]
ENSMUSG00000075705	Msrb1	69.7621	69.3277	67.4145	59.4475	52.8293	63.4685	17	24736642	24742778	+	1258	protein_coding	methionine sulfoxide reductase B1 [Source:MGI Symbol;Acc:MGI:1351642]
ENSMUSG00000038403	Hfe2	106.995	65.4968	74.7473	53.9445	28.988	51.3233	3	96525172	96529210	+	2028	protein_coding	hemochromatosis type 2 (juvenile) [Source:MGI Symbol;Acc:MGI:1916835]
ENSMUSG00000006360	Crip1	69.9522	67.6216	55.3903	63.3574	62.562	62.3291	12	113146316	113153879	+	2280	protein_coding	cysteine-rich protein 1 (intestinal) [Source:MGI Symbol;Acc:MGI:88501]
ENSMUSG00000025868	Higd2a	71.5098	61.7669	63.7087	56.0713	62.5493	65.1105	13	54590207	54591158	+	648	protein_coding	HIG1 domain family, member 2A [Source:MGI Symbol;Acc:MGI:1914294]
ENSMUSG00000051319	1500011K16Rik	81.3806	78.5693	67.0417	50.654	41.9473	60.1844	2	127791388	127792488	-	800	protein_coding	RIKEN cDNA 1500011K16 gene [Source:MGI Symbol;Acc:MGI:1915135]
ENSMUSG00000014313	Cox6c	82.7147	73.4983	66.0075	53.6012	42.0249	59.8188	15	35925886	35938246	-	3567	protein_coding	cytochrome c oxidase subunit VIc [Source:MGI Symbol;Acc:MGI:104614]
ENSMUSG00000022111	Uchl3	52.3186	61.1298	57.0891	70.1056	79.3989	57.5211	14	101653967	101696124	+	929	protein_coding	ubiquitin carboxyl-terminal esterase L3 (ubiquitin thiolesterase) [Source:MGI Symbol;Acc:MGI:1355274]
ENSMUSG00000027404	Snrpb	56.2467	58.5187	60.5096	58.2874	79.7855	63.782	2	130171414	130179403	-	1976	protein_coding	small nuclear ribonucleoprotein B [Source:MGI Symbol;Acc:MGI:98342]
ENSMUSG00000027919	Lce1g	51.3432	96.3511	73.9714	65.2604	34.7708	55.2934	3	92750148	92752338	-	925	protein_coding	late cornified envelope 1G [Source:MGI Symbol;Acc:MGI:1913445]
ENSMUSG00000072692	Rpl37rt	53.946	62.6883	56.4872	81.7983	61.9728	59.3736	5	115102923	115110268	-	752	transcribed_processed_pseudogene	ribosomal protein L37, retrotransposed [Source:MGI Symbol;Acc:MGI:3651519]
ENSMUSG00000024346	Pfdn1	64.6174	74.5042	66.3522	55.4359	52.0326	61.9531	18	36403679	36454495	-	1077	protein_coding	prefoldin 1 [Source:MGI Symbol;Acc:MGI:1914449]
ENSMUSG00000052837	Junb	28.7399	43.2374	35.9261	81.6359	104.228	81.1101	8	84974484	84978718	-	2301	protein_coding	jun B proto-oncogene [Source:MGI Symbol;Acc:MGI:96647]
ENSMUSG00000015839	Nfe2l2	56.9141	71.4424	69.6213	58.0807	66.7131	51.7445	2	75675513	75704641	-	3796	protein_coding	nuclear factor, erythroid derived 2, like 2 [Source:MGI Symbol;Acc:MGI:108420]
ENSMUSG00000064369	mt-Te	115.232	83.0652	91.6587	35.7871	20.2149	27.1631	MT	14071	14139	-	69	Mt_tRNA	mitochondrially encoded tRNA glutamic acid [Source:MGI Symbol;Acc:MGI:102488]
ENSMUSG00000022462	Slc38a2	62.7075	58.8203	63.5026	61.9673	66.9105	58.5857	15	96687394	96699698	-	4626	protein_coding	solute carrier family 38, member 2 [Source:MGI Symbol;Acc:MGI:1915010]
ENSMUSG00000004771	Rab11a	58.0349	70.4465	64.2292	61.5884	64.882	53.1624	9	64715299	64737758	-	2992	protein_coding	RAB11A, member RAS oncogene family [Source:MGI Symbol;Acc:MGI:1858202]
ENSMUSG00000064215	Ifi27	64.1067	87.9064	56.8596	54.525	48.7985	58.7417	12	103434211	103440239	+	1467	protein_coding	interferon, alpha-inducible protein 27 [Source:MGI Symbol;Acc:MGI:1277180]
ENSMUSG00000028757	Ddost	48.9983	52.8992	53.9096	68.4927	74.6177	70.5105	4	138304730	138312628	+	2120	protein_coding	dolichyl-di-phosphooligosaccharide-protein glycotransferase [Source:MGI Symbol;Acc:MGI:1194508]
ENSMUSG00000025510	Cd151	70.9288	65.4839	66.786	52.6854	51.1119	61.252	7	141467392	141471473	+	2741	protein_coding	CD151 antigen [Source:MGI Symbol;Acc:MGI:1096360]
ENSMUSG00000001473	Tubb6	42.6745	37.7044	46.341	55.4135	106.308	79.6734	18	67390717	67402748	+	1757	protein_coding	tubulin, beta 6 class V [Source:MGI Symbol;Acc:MGI:1915201]
ENSMUSG00000075605	Slurp2	61.4153	73.0021	80.6832	38.674	65.5635	48.0696	15	74742764	74746693	-	545	protein_coding	secreted Ly6/Plaur domain containing 2 [Source:MGI Symbol;Acc:MGI:1916712]
ENSMUSG00000056973	Ces1d	85.4229	99.779	92.0511	27.1568	34.0801	27.7961	8	93166068	93197838	-	2369	protein_coding	carboxylesterase 1D [Source:MGI Symbol;Acc:MGI:2148202]
ENSMUSG00000022587	Ly6e	43.1203	63.6412	45.0742	65.6296	57.4166	91.1042	15	74955051	74959905	+	3784	protein_coding	lymphocyte antigen 6 complex, locus E [Source:MGI Symbol;Acc:MGI:106651]
ENSMUSG00000079941	Gm11273	64.5597	63.9283	61.9293	57.6625	51.1225	66.4266	13	21501029	21501418	-	390	protein_coding	predicted gene 11273 [Source:MGI Symbol;Acc:MGI:3649411]
ENSMUSG00000083061	Gm12191	47.0468	126.955	35.775	59.5534	46.2112	49.4296	11	49678710	49679057	-	348	processed_pseudogene	predicted gene 12191 [Source:MGI Symbol;Acc:MGI:3651293]
ENSMUSG00000041476	Smpx	99.9634	81.5007	84.9535	35.1596	23.7851	39.3434	X	157698910	157752591	+	2275	protein_coding	small muscle protein, X-linked [Source:MGI Symbol;Acc:MGI:1913356]
ENSMUSG00000062713	Sim2	80.6496	69.7957	73.3413	45.1041	44.0312	51.5803	16	94085260	94127032	+	3670	protein_coding	single-minded homolog 2 (Drosophila) [Source:MGI Symbol;Acc:MGI:98307]
ENSMUSG00000019528	Gyg	87.1546	72.092	75.9305	46.879	31.5033	49.8593	3	20122084	20155317	-	2344	protein_coding	glycogenin [Source:MGI Symbol;Acc:MGI:1351614]
ENSMUSG00000027022	Xirp2	103.309	58.8788	80.6492	34.3917	32.2023	52.2374	2	67446002	67526614	+	11979	protein_coding	xin actin-binding repeat containing 2 [Source:MGI Symbol;Acc:MGI:2685198]
ENSMUSG00000000563	Atp5f1	67.4484	63.6329	62.3668	53.7625	50.978	63.434	3	105942698	105960099	-	4105	protein_coding	ATP synthase, H+ transporting, mitochondrial F0 complex, subunit B1 [Source:MGI Symbol;Acc:MGI:1100495]
ENSMUSG00000020577	Tspan13	92.7521	79.7135	80.7369	41.261	24.9064	42.0037	12	36014557	36042500	-	2474	protein_coding	tetraspanin 13 [Source:MGI Symbol;Acc:MGI:1913359]
ENSMUSG00000031461	Myom2	92.54	67.476	85.0568	38.5264	31.7888	45.9125	8	15057653	15133541	+	8853	protein_coding	myomesin 2 [Source:MGI Symbol;Acc:MGI:1328358]
ENSMUSG00000038642	Ctss	23.8605	38.1608	21.8191	96.3074	83.9215	97.0712	3	95526786	95556403	+	1358	protein_coding	cathepsin S [Source:MGI Symbol;Acc:MGI:107341]
ENSMUSG00000040154	Wfdc5	41.5509	74.0504	65.4977	67.8324	59.1689	52.2331	2	164176327	164182742	-	2322	protein_coding	WAP four-disulfide core domain 5 [Source:MGI Symbol;Acc:MGI:2384800]
ENSMUSG00000046694	Fam46b	37.7756	57.954	52.6949	64.5902	89.152	57.1301	4	133480132	133487938	+	2287	protein_coding	family with sequence similarity 46, member B [Source:MGI Symbol;Acc:MGI:2140500]
ENSMUSG00000024587	Nars	58.1607	60.9734	54.1884	59.0054	67.397	59.342	18	64499665	64516557	-	2632	protein_coding	asparaginyl-tRNA synthetase [Source:MGI Symbol;Acc:MGI:1917473]
ENSMUSG00000008683	Rps15a	53.2674	65.5801	53.778	64.0817	61.1962	60.8477	7	118104372	118116188	-	6270	protein_coding	ribosomal protein S15A [Source:MGI Symbol;Acc:MGI:2389091]
ENSMUSG00000073639	Rab18	64.1497	63.0202	61.6473	57.7317	57.0195	53.7743	18	6765205	6790231	+	2257	protein_coding	RAB18, member RAS oncogene family [Source:MGI Symbol;Acc:MGI:102790]
ENSMUSG00000001289	Pfdn5	68.1691	70.0334	64.4455	52.5406	47.5281	54.3484	15	102326116	102331873	+	1394	protein_coding	prefoldin 5 [Source:MGI Symbol;Acc:MGI:1928753]
ENSMUSG00000064023	Klk8	45.4678	65.2547	55.3608	52.2267	73.5506	65.1527	7	43797577	43803826	+	1540	protein_coding	kallikrein related-peptidase 8 [Source:MGI Symbol;Acc:MGI:1343327]
ENSMUSG00000026489	Coq8a	80.5282	67.4071	71.4852	46.5191	33.9557	56.7584	1	180165238	180199602	-	5293	protein_coding	coenzyme Q8A [Source:MGI Symbol;Acc:MGI:1914676]
ENSMUSG00000025066	Sfr1	53.5762	56.5728	57.0343	64.8749	65.5922	57.9892	19	47731756	47735588	+	1583	protein_coding	SWI5 dependent recombination repair 1 [Source:MGI Symbol;Acc:MGI:1915038]
ENSMUSG00000044103	Il1f9	28.5329	53.7328	40.522	72.8047	93.6239	66.1398	2	24186476	24193568	+	1648	protein_coding	interleukin 1 family, member 9 [Source:MGI Symbol;Acc:MGI:2449929]
ENSMUSG00000007564	Ppp2r1a	55.5781	58.8009	59.7291	55.2264	68.4467	57.3846	17	20945311	20965916	+	3375	protein_coding	protein phosphatase 2, regulatory subunit A, alpha [Source:MGI Symbol;Acc:MGI:1926334]
ENSMUSG00000051391	Ywhag	64.712	54.484	58.5634	50.5167	65.3479	60.5669	5	135908409	135934616	-	5500	protein_coding	tyrosine 3-monooxygenase/tryptophan 5-monooxygenase activation protein, gamma polypeptide [Source:MGI Symbol;Acc:MGI:108109]
ENSMUSG00000019054	Fis1	57.0632	71.2536	61.3043	57.3182	48.1329	58.004	5	136953275	136966234	+	1714	protein_coding	fission, mitochondrial 1 [Source:MGI Symbol;Acc:MGI:1913687]
ENSMUSG00000067736	Gm10222	88.6939	57.0226	53.6946	74.3914	26.6518	51.8502	1	24612407	24612700	-	294	unprocessed_pseudogene	predicted gene 10222 [Source:MGI Symbol;Acc:MGI:3642643]
ENSMUSG00000028062	Lamtor2	58.3304	63.801	58.8755	55.3539	58.8082	56.8671	3	88549819	88553074	-	1218	protein_coding	late endosomal/lysosomal adaptor, MAPK and MTOR activator 2 [Source:MGI Symbol;Acc:MGI:1932697]
ENSMUSG00000030120	Mlf2	58.7492	58.8598	63.71	46.726	62.2957	61.0855	6	124931386	124937238	+	4106	protein_coding	myeloid leukemia factor 2 [Source:MGI Symbol;Acc:MGI:1353554]
ENSMUSG00000021832	Psmc6	60.6774	59.1229	57.1859	59.9679	54.087	59.4127	14	45329824	45349071	+	1564	protein_coding	proteasome (prosome, macropain) 26S subunit, ATPase, 6 [Source:MGI Symbol;Acc:MGI:1914339]
ENSMUSG00000022186	Oxct1	51.93	61.6357	64.25	57.1411	60.367	54.7945	15	4026383	4155344	+	3701	protein_coding	3-oxoacid CoA transferase 1 [Source:MGI Symbol;Acc:MGI:1914291]
ENSMUSG00000075217	4833423E24Rik	48.8436	72.842	64.3308	63.5611	50.9192	49.2946	2	85483594	85519024	-	2272	protein_coding	RIKEN cDNA 4833423E24 gene [Source:MGI Symbol;Acc:MGI:2687041]
ENSMUSG00000016382	Pls3	52.6426	66.189	58.0477	56.7677	58.7969	57.178	X	75785654	75875182	-	4238	protein_coding	plastin 3 (T-isoform) [Source:MGI Symbol;Acc:MGI:104807]
ENSMUSG00000031400	G6pdx	43.15	66.0146	52.0786	57.6383	75.9348	54.4427	X	74409483	74429194	-	3080	protein_coding	glucose-6-phosphate dehydrogenase X-linked [Source:MGI Symbol;Acc:MGI:105979]
ENSMUSG00000030137	Tuba8	74.9923	65.2592	75.1934	48.6739	37.2536	47.4109	6	121210696	121226854	+	2263	protein_coding	tubulin, alpha 8 [Source:MGI Symbol;Acc:MGI:1858225]
ENSMUSG00000016256	Ctsz	49.6892	47.0996	44.8915	62.9446	64.7961	79.0225	2	174427493	174439039	-	1441	protein_coding	cathepsin Z [Source:MGI Symbol;Acc:MGI:1891190]
ENSMUSG00000031701	Dnaja2	60.5219	61.5052	61.4158	56.6045	55.5724	52.4302	8	85537633	85555344	-	2975	protein_coding	DnaJ heat shock protein family (Hsp40) member A2 [Source:MGI Symbol;Acc:MGI:1931882]
ENSMUSG00000022265	Ank	74.3343	67.0237	84.7739	48.9223	31.9052	40.2995	15	27466677	27594909	+	3608	protein_coding	progressive ankylosis [Source:MGI Symbol;Acc:MGI:3045421]
ENSMUSG00000078713	Tomm5	51.957	58.9327	53.7575	50.6989	58.7951	73.0797	4	45105208	45108114	-	868	protein_coding	translocase of outer mitochondrial membrane 5 homolog (yeast) [Source:MGI Symbol;Acc:MGI:1915762]
ENSMUSG00000001604	Tcea3	88.4568	74.7483	74.1291	40.5673	25.6695	42.9591	4	136247729	136274898	+	1400	protein_coding	transcription elongation factor A (SII), 3 [Source:MGI Symbol;Acc:MGI:1196908]
ENSMUSG00000017188	Coa3	64.4108	54.1236	58.848	49.7187	57.3228	61.253	11	101277968	101279114	-	886	protein_coding	cytochrome C oxidase assembly factor 3 [Source:MGI Symbol;Acc:MGI:1098757]
ENSMUSG00000082691	Dynlt1-ps1	44.2474	48.4608	48.0515	68.3342	64.0554	72.4615	6	135349408	135349749	-	342	processed_pseudogene	dynein light chain Tctex-type 1, pseuodogene 1 [Source:MGI Symbol;Acc:MGI:3642625]
ENSMUSG00000021190	Lgmn	51.746	49.983	49.8417	82.1535	53.1567	58.5755	12	102394084	102439813	-	2323	protein_coding	legumain [Source:MGI Symbol;Acc:MGI:1330838]
ENSMUSG00000021361	Tmem14c	59.8652	61.4537	60.8047	52.4411	56.1952	54.5462	13	41016292	41022586	+	914	protein_coding	transmembrane protein 14C [Source:MGI Symbol;Acc:MGI:1913404]
ENSMUSG00000023939	Mrpl14	65.5402	68.2968	64.177	52.9231	43.8341	49.3745	17	45686322	45698495	+	949	protein_coding	mitochondrial ribosomal protein L14 [Source:MGI Symbol;Acc:MGI:1333864]
ENSMUSG00000031422	Morf4l2	52.2379	51.2361	52.4039	62.408	64.9976	60.2632	X	136732942	136743690	-	3135	protein_coding	mortality factor 4 like 2 [Source:MGI Symbol;Acc:MGI:1927167]
ENSMUSG00000009549	Srp14	62.279	63.0305	61.2171	51.9914	48.7485	55.9401	2	118475850	118479711	-	1195	protein_coding	signal recognition particle 14 [Source:MGI Symbol;Acc:MGI:107169]
ENSMUSG00000031879	Fam96b	59.1155	55.2642	61.5543	49.9551	56.1987	60.7333	8	104639838	104641965	-	1076	protein_coding	family with sequence similarity 96, member B [Source:MGI Symbol;Acc:MGI:1915773]
ENSMUSG00000034868	Myl12b	51.9416	60.408	59.7819	56.9033	57.7121	56.0609	17	70973920	70990787	-	1711	protein_coding	myosin, light chain 12B, regulatory [Source:MGI Symbol;Acc:MGI:107494]
ENSMUSG00000020022	Ndufa12	72.1324	65.8793	78.5059	40.0292	35.5503	50.486	10	94198955	94221443	+	1334	protein_coding	NADH dehydrogenase (ubiquinone) 1 alpha subcomplex, 12 [Source:MGI Symbol;Acc:MGI:1913664]
ENSMUSG00000037960	Card19	65.0619	58.2075	63.6899	50.4837	42.2742	62.5457	13	49202950	49216037	-	1477	protein_coding	caspase recruitment domain family, member 19 [Source:MGI Symbol;Acc:MGI:1915730]
ENSMUSG00000036856	Wnt4	50.29	65.0157	62.5394	43.5587	80.2487	40.4684	4	137277489	137299726	+	4194	protein_coding	wingless-type MMTV integration site family, member 4 [Source:MGI Symbol;Acc:MGI:98957]
ENSMUSG00000027187	Cat	61.5774	55.6955	57.0218	53.4437	64.072	49.9547	2	103453849	103485160	-	2613	protein_coding	catalase [Source:MGI Symbol;Acc:MGI:88271]
ENSMUSG00000063694	Cycs	65.6659	59.3804	59.0593	47.0354	48.653	61.582	6	50562563	50566538	-	3404	protein_coding	cytochrome c, somatic [Source:MGI Symbol;Acc:MGI:88578]
ENSMUSG00000038690	Atp5j2	67.522	63.7844	55.8391	50.0569	42.5133	61.5807	5	145183698	145192062	-	3306	protein_coding	ATP synthase, H+ transporting, mitochondrial F0 complex, subunit F2 [Source:MGI Symbol;Acc:MGI:1927558]
ENSMUSG00000047370	Gm7367	41.4442	52.0339	58.0986	55.4771	59.8687	73.1417	7	60155609	60156100	+	492	processed_pseudogene	predicted pseudogene 7367 [Source:MGI Symbol;Acc:MGI:3646404]
ENSMUSG00000020029	Nudt4	67.5304	62.121	68.8341	49.4797	43.657	48.3323	10	95547007	95564146	-	3210	protein_coding	nudix (nucleoside diphosphate linked moiety X)-type motif 4 [Source:MGI Symbol;Acc:MGI:1918457]
ENSMUSG00000061315	Naca	55.7697	63.9196	55.9459	56.5231	53.0753	54.5706	10	128035575	128048637	+	6805	protein_coding	nascent polypeptide-associated complex alpha polypeptide [Source:MGI Symbol;Acc:MGI:106095]
ENSMUSG00000029713	Gnb2	52.4732	54.4734	57.7766	51.6903	64.5873	58.7289	5	137528127	137533510	-	3402	protein_coding	guanine nucleotide binding protein (G protein), beta 2 [Source:MGI Symbol;Acc:MGI:95784]
ENSMUSG00000030647	Ndufc2	65.7654	67.3362	55.4127	49.0073	43.255	58.8847	7	97400003	97407802	+	754	protein_coding	NADH dehydrogenase (ubiquinone) 1, subcomplex unknown, 2 [Source:MGI Symbol;Acc:MGI:1344370]
ENSMUSG00000038170	Pde4dip	86.337	57.3989	69.5978	43.3206	37.768	45.2328	3	97689824	97888707	-	16857	protein_coding	phosphodiesterase 4D interacting protein (myomegalin) [Source:MGI Symbol;Acc:MGI:1891434]
ENSMUSG00000022594	Lynx1	77.967	71.8691	71.6112	42.9315	27.1471	47.1088	15	74747852	74753046	-	4662	protein_coding	Ly6/neurotoxin 1 [Source:MGI Symbol;Acc:MGI:1345180]
ENSMUSG00000025651	Uqcrc1	60.9527	53.561	54.3271	48.8509	63.3966	57.2224	9	108936633	108949623	+	4135	protein_coding	ubiquinol-cytochrome c reductase core protein 1 [Source:MGI Symbol;Acc:MGI:107876]
ENSMUSG00000029020	Mfn2	77.8739	58.4295	67.1143	43.5685	36.5222	54.7771	4	147873599	147904704	-	5194	protein_coding	mitofusin 2 [Source:MGI Symbol;Acc:MGI:2442230]
ENSMUSG00000030847	Bag3	72.2637	58.3329	67.1954	40.7903	48.1499	51.2417	7	128523616	128546981	+	2562	protein_coding	BCL2-associated athanogene 3 [Source:MGI Symbol;Acc:MGI:1352493]
ENSMUSG00000021134	Srsf5	54.9565	52.086	53.5575	63.367	55.7963	57.2011	12	80945504	80950507	+	3988	protein_coding	serine/arginine-rich splicing factor 5 [Source:MGI Symbol;Acc:MGI:98287]
ENSMUSG00000020368	Canx	53.924	46.4394	54.7437	62.3135	60.5704	58.6013	11	50293961	50325673	-	4693	protein_coding	calnexin [Source:MGI Symbol;Acc:MGI:88261]
ENSMUSG00000009293	Ube2g2	73.696	63.9518	64.0768	47.8496	43.7412	42.2669	10	77622275	77645993	+	2431	protein_coding	ubiquitin-conjugating enzyme E2G 2 [Source:MGI Symbol;Acc:MGI:1343188]
ENSMUSG00000000303	Cdh1	40.9999	53.8503	52.7928	55.1813	78.6403	53.9066	8	106603351	106670246	+	4574	protein_coding	cadherin 1 [Source:MGI Symbol;Acc:MGI:88354]
ENSMUSG00000005881	Ergic3	46.4963	50.78	54.1894	56.0074	60.637	67.139	2	156008045	156018279	+	2121	protein_coding	ERGIC and golgi 3 [Source:MGI Symbol;Acc:MGI:1913616]
ENSMUSG00000024512	Dynap	13.7614	27.9101	24.2297	108.818	97.2278	63.205	18	70240429	70244584	-	1227	protein_coding	dynactin associated protein [Source:MGI Symbol;Acc:MGI:1922827]
ENSMUSG00000056692	D17Wsu92e	70.1462	53.685	58.8563	46.8547	52.096	53.2142	17	27751232	27820558	-	4250	protein_coding	DNA segment, Chr 17, Wayne State University 92, expressed [Source:MGI Symbol;Acc:MGI:106281]
ENSMUSG00000028837	Psmb2	48.3573	55.8551	49.9229	58.1217	65.8296	56.4906	4	126677630	126709714	+	1204	protein_coding	proteasome (prosome, macropain) subunit, beta type 2 [Source:MGI Symbol;Acc:MGI:1347045]
ENSMUSG00000030654	Arl6ip1	52.6852	62.734	60.3123	55.6072	46.4787	56.367	7	118118891	118129662	-	2482	protein_coding	ADP-ribosylation factor-like 6 interacting protein 1 [Source:MGI Symbol;Acc:MGI:1858943]
ENSMUSG00000031312	Itgb1bp2	99.5383	76.3563	73.0512	29.3884	22.9179	32.8293	X	101449088	101453541	+	1799	protein_coding	integrin beta 1 binding protein 2 [Source:MGI Symbol;Acc:MGI:1353420]
ENSMUSG00000032562	Gnai2	46.9669	48.6725	49.1795	60.2673	59.3815	68.8181	9	107614125	107635367	-	3779	protein_coding	guanine nucleotide binding protein (G protein), alpha inhibiting 2 [Source:MGI Symbol;Acc:MGI:95772]
ENSMUSG00000018821	Avpi1	31.611	49.9265	38.9607	62.4321	80.5549	69.7202	19	42123273	42129059	-	1236	protein_coding	arginine vasopressin-induced 1 [Source:MGI Symbol;Acc:MGI:1916784]
ENSMUSG00000022890	Atp5j	69.3111	61.4656	57.5789	45.8277	41.1029	57.8311	16	84827866	84835625	-	3130	protein_coding	ATP synthase, H+ transporting, mitochondrial F0 complex, subunit F [Source:MGI Symbol;Acc:MGI:107777]
ENSMUSG00000084830	Gm14539	55.0313	64.7813	55.2366	56.5124	39.1381	62.2358	X	20581141	20581314	-	174	processed_pseudogene	predicted gene 14539 [Source:MGI Symbol;Acc:MGI:3705371]
ENSMUSG00000026880	Stom	27.702	27.8769	25.5248	77.1621	87.8096	85.8638	2	35313986	35336976	-	2827	protein_coding	stomatin [Source:MGI Symbol;Acc:MGI:95403]
ENSMUSG00000009097	Tbx1	58.9853	58.1106	56.945	38.8343	44.5795	74.3702	16	18581713	18586969	-	1777	protein_coding	T-box 1 [Source:MGI Symbol;Acc:MGI:98493]
ENSMUSG00000040703	Cyp2s1	75.7388	82.9605	89.533	32.1291	28.3215	23.0434	7	25802475	25816913	-	4938	protein_coding	cytochrome P450, family 2, subfamily s, polypeptide 1 [Source:MGI Symbol;Acc:MGI:1921384]
ENSMUSG00000003849	Nqo1	44.6743	59.0803	41.3333	56.8151	80.1466	49.6154	8	107388225	107403206	-	1553	protein_coding	NAD(P)H dehydrogenase, quinone 1 [Source:MGI Symbol;Acc:MGI:103187]
ENSMUSG00000020091	Eif4ebp2	69.583	59.5875	64.5043	47.8838	46.053	44.0336	10	61428491	61452661	-	5784	protein_coding	eukaryotic translation initiation factor 4E binding protein 2 [Source:MGI Symbol;Acc:MGI:109198]
ENSMUSG00000000399	Ndufa9	65.3319	59.6065	59.0428	48.3763	44.4999	54.5357	6	126821721	126849136	-	2101	protein_coding	NADH dehydrogenase (ubiquinone) 1 alpha subcomplex, 9 [Source:MGI Symbol;Acc:MGI:1913358]
ENSMUSG00000037710	Cisd1	74.2561	64.1092	61.9269	42.2644	38.9049	49.642	10	71330480	71344954	-	1084	protein_coding	CDGSH iron sulfur domain 1 [Source:MGI Symbol;Acc:MGI:1261855]
ENSMUSG00000024091	Vapa	62.6877	55.9753	55.2342	49.1765	56.5835	51.4024	17	65580056	65613555	-	1640	protein_coding	vesicle-associated membrane protein, associated protein A [Source:MGI Symbol;Acc:MGI:1353561]
ENSMUSG00000020456	Ogdh	66.0487	52.122	60.0214	47.1418	49.2201	56.475	11	6291633	6356642	+	5456	protein_coding	oxoglutarate (alpha-ketoglutarate) dehydrogenase (lipoamide) [Source:MGI Symbol;Acc:MGI:1098267]
ENSMUSG00000031176	Dynlt3	55.6415	67.5276	57.7249	53.3041	47.0282	49.5889	X	9654267	9663003	-	2576	protein_coding	dynein light chain Tctex-type 3 [Source:MGI Symbol;Acc:MGI:1914367]
ENSMUSG00000040462	Os9	42.5524	50.3241	50.2345	60.3642	62.4024	64.907	10	127095650	127121131	-	2629	protein_coding	amplified in osteosarcoma [Source:MGI Symbol;Acc:MGI:1924301]
ENSMUSG00000042485	Mustn1	57.8563	53.8495	51.5758	43.8701	31.6831	91.8285	14	30879257	30881608	+	1177	protein_coding	musculoskeletal, embryonic nuclear protein 1 [Source:MGI Symbol;Acc:MGI:1913425]
ENSMUSG00000050299	Gm9843	32.7392	46.1515	48.0203	101.138	53.885	48.5092	16	76403209	76403712	-	504	protein_coding	predicted gene 9843 [Source:MGI Symbol;Acc:MGI:3708621]
ENSMUSG00000020484	Xbp1	52.7895	49.733	59.4427	53.313	54.9432	60.2055	11	5520659	5525893	+	3248	protein_coding	X-box binding protein 1 [Source:MGI Symbol;Acc:MGI:98970]
ENSMUSG00000062456	Rpl9-ps6	46.8305	62.2087	52.6095	66.6847	53.8481	47.2557	19	32465885	32466575	-	691	protein_coding	ribosomal protein L9, pseudogene 6 [Source:MGI Symbol;Acc:MGI:3642682]
ENSMUSG00000086922	Gm13835	49.1129	55.0837	47.1817	59.5442	59.6499	57.8846	6	31141979	31142663	-	685	processed_pseudogene	predicted gene 13835 [Source:MGI Symbol;Acc:MGI:3650921]
ENSMUSG00000039891	Txlnb	83.5146	69.3702	73.3049	38.9916	23.5606	39.5162	10	17796226	17845665	+	5504	protein_coding	taxilin beta [Source:MGI Symbol;Acc:MGI:2671945]
ENSMUSG00000047547	Cltb	45.4785	52.6584	50.9548	57.5733	67.5282	53.9792	13	54592401	54611344	-	4868	protein_coding	clathrin, light polypeptide (Lcb) [Source:MGI Symbol;Acc:MGI:1921575]
ENSMUSG00000027406	Idh3b	69.7802	60.2405	61.3826	43.5279	40.305	52.9329	2	130279309	130284547	-	3422	protein_coding	isocitrate dehydrogenase 3 (NAD+) beta [Source:MGI Symbol;Acc:MGI:2158650]
ENSMUSG00000037266	Rsrp1	58.7922	51.2138	54.8545	50.6913	49.9175	62.5809	4	134923592	134927671	+	3349	protein_coding	arginine/serine rich protein 1 [Source:MGI Symbol;Acc:MGI:106498]
ENSMUSG00000014077	Chp1	49.9067	58.0821	55.0932	56.4324	53.804	54.5416	2	119547697	119587027	+	3499	protein_coding	calcineurin-like EF hand protein 1 [Source:MGI Symbol;Acc:MGI:1927185]
ENSMUSG00000084349	Rpl3-ps1	45.0792	53.2887	47.5352	71.1713	59.0614	51.7012	X	13202571	13203780	+	1210	processed_pseudogene	ribosomal protein L3, pseudogene 1 [Source:MGI Symbol;Acc:MGI:3644217]
ENSMUSG00000029064	Gnb1	43.028	46.5315	45.7734	59.2925	72.5518	60.4649	4	155491361	155559269	+	4268	protein_coding	guanine nucleotide binding protein (G protein), beta 1 [Source:MGI Symbol;Acc:MGI:95781]
ENSMUSG00000024012	Mtch1	53.3527	56.8072	58.3466	48.5687	54.1098	56.1799	17	29332072	29347904	-	2878	protein_coding	mitochondrial carrier 1 [Source:MGI Symbol;Acc:MGI:1929261]
ENSMUSG00000091086	Rpl6l	50.2566	56.5911	47.569	55.0806	63.3497	54.4177	10	111125851	111126721	+	871	processed_pseudogene	ribosomal protein L6-like [Source:MGI Symbol;Acc:MGI:3647789]
ENSMUSG00000057003	Myh4	84.5287	120.264	95.5415	11.5881	9.32865	5.60089	11	67238029	67260446	+	6016	protein_coding	myosin, heavy polypeptide 4, skeletal muscle [Source:MGI Symbol;Acc:MGI:1339713]
ENSMUSG00000029048	Rer1	55.4257	58.0312	55.2344	54.4501	51.6761	51.7757	4	155074110	155086382	-	1814	protein_coding	retention in endoplasmic reticulum sorting receptor 1 [Source:MGI Symbol;Acc:MGI:1915080]
ENSMUSG00000060143	Gm10076	44.4174	47.5137	43.574	77.166	38.4602	75.2739	14	105681828	105682211	+	384	protein_coding	predicted gene 10076 [Source:MGI Symbol;Acc:MGI:3704451]
ENSMUSG00000113902	AC121965.1	77.2273	64.2495	53.2109	41.1501	38.9606	50.681	12	101968090	101977068	-	1153	bidirectional_promoter_lncRNA
ENSMUSG00000002768	Mea1	46.7678	55.0974	54.2451	49.5017	60.2666	59.5002	17	46681137	46683105	+	840	protein_coding	male enhanced antigen 1 [Source:MGI Symbol;Acc:MGI:96957]
ENSMUSG00000024194	Cuta	57.3699	57.3297	52.7146	52.9954	50.0635	54.8704	17	26937973	26939478	-	649	protein_coding	cutA divalent cation tolerance homolog [Source:MGI Symbol;Acc:MGI:1914925]
ENSMUSG00000029455	Aldh2	61.436	59.596	66.5474	39.9486	45.29	52.2374	5	121566027	121593824	-	5126	protein_coding	aldehyde dehydrogenase 2, mitochondrial [Source:MGI Symbol;Acc:MGI:99600]
ENSMUSG00000031827	Cotl1	28.1502	33.9964	29.8918	48.1286	98.6793	85.7273	8	119809222	119840544	-	1596	protein_coding	coactosin-like 1 (Dictyostelium) [Source:MGI Symbol;Acc:MGI:1919292]
ENSMUSG00000022400	Rbx1	57.3153	57.4016	56.3584	53.4201	49.824	49.7285	15	81466316	81476369	+	1655	protein_coding	ring-box 1 [Source:MGI Symbol;Acc:MGI:1891829]
ENSMUSG00000036299	BC031181	52.5464	56.0194	56.315	54.0341	48.2731	56.8065	18	75005900	75009933	+	1047	protein_coding	cDNA sequence BC031181 [Source:MGI Symbol;Acc:MGI:3039614]
ENSMUSG00000024853	Sf3b2	50.6196	49.8616	54.6384	51.6692	60.3619	55.1726	19	5273923	5295455	-	3231	protein_coding	splicing factor 3b, subunit 2 [Source:MGI Symbol;Acc:MGI:2441856]
ENSMUSG00000073418	C4b	21.6477	27.1227	16.5617	96.7377	70.2347	89.3631	17	34728380	34743882	-	5695	protein_coding	complement component 4B (Chido blood group) [Source:MGI Symbol;Acc:MGI:88228]
ENSMUSG00000026327	Serpinb11	38.9538	70.5076	53.7171	60.696	41.5497	55.235	1	107361198	107380475	+	2186	protein_coding	serine (or cysteine) peptidase inhibitor, clade B (ovalbumin), member 11 [Source:MGI Symbol;Acc:MGI:1914207]
ENSMUSG00000024937	Ehbp1l1	76.7929	57.6413	63.9497	39.432	33.0296	48.5832	19	5707376	5726317	-	6440	protein_coding	EH domain binding protein 1-like 1 [Source:MGI Symbol;Acc:MGI:3612340]
ENSMUSG00000036835	Psenen	52.3029	57.0902	54.7592	52.3605	47.7168	54.7168	7	30561863	30563627	-	1275	protein_coding	presenilin enhancer gamma secretase subunit [Source:MGI Symbol;Acc:MGI:1913590]
ENSMUSG00000002524	Puf60	49.5889	50.96	53.0805	53.5965	56.9877	54.6113	15	76070184	76080946	-	1912	protein_coding	poly-U binding splicing factor 60 [Source:MGI Symbol;Acc:MGI:1915209]
ENSMUSG00000070319	Eif3g	48.6081	54.1661	52.4092	51.5181	56.5324	55.1486	9	20894349	20898623	-	1984	protein_coding	eukaryotic translation initiation factor 3, subunit G [Source:MGI Symbol;Acc:MGI:1858258]
ENSMUSG00000044424	Gm9493	41.7877	48.7524	49.3688	62.9818	56.6121	58.8425	19	23619742	23620320	+	579	protein_coding	predicted gene 9493 [Source:MGI Symbol;Acc:MGI:3779903]
ENSMUSG00000038412	Higd1a	48.4847	55.8067	49.3565	53.233	58.554	51.7339	9	121848563	121858362	-	3040	protein_coding	HIG1 domain family, member 1A [Source:MGI Symbol;Acc:MGI:1930666]
ENSMUSG00000028618	Tmem59	51.1058	57.2871	51.4216	55.762	52.7968	47.9908	4	107178399	107200996	+	2056	protein_coding	transmembrane protein 59 [Source:MGI Symbol;Acc:MGI:1929278]
ENSMUSG00000030341	Tnfrsf1a	37.468	46.3246	41.3228	59.9221	68.9227	61.9528	6	125349362	125362484	+	2591	protein_coding	tumor necrosis factor receptor superfamily, member 1a [Source:MGI Symbol;Acc:MGI:1314884]
ENSMUSG00000028773	Fabp3	73.9122	41.5528	48.5281	25.5568	17.5961	107.896	4	130308595	130315463	+	823	protein_coding	fatty acid binding protein 3, muscle and heart [Source:MGI Symbol;Acc:MGI:95476]
ENSMUSG00000007721	Ccdc124	55.9549	53.5638	53.6747	48.8268	53.796	49.1157	8	70868227	70873935	-	1696	protein_coding	coiled-coil domain containing 124 [Source:MGI Symbol;Acc:MGI:1916403]
ENSMUSG00000001847	Rac1	47.1877	49.4197	50.8178	53.1865	58.5253	55.3976	5	143503634	143528036	-	4496	protein_coding	RAS-related C3 botulinum substrate 1 [Source:MGI Symbol;Acc:MGI:97845]
ENSMUSG00000055065	Ddx17	58.2268	47.2509	54.558	47.9107	51.5625	54.8424	15	79527707	79546741	-	4761	protein_coding	DEAD (Asp-Glu-Ala-Asp) box polypeptide 17 [Source:MGI Symbol;Acc:MGI:1914290]
ENSMUSG00000022884	Eif4a2	65.7069	58.5981	61.4322	47.6387	34.584	46.3005	16	23107444	23114136	+	5338	protein_coding	eukaryotic translation initiation factor 4A2 [Source:MGI Symbol;Acc:MGI:106906]
ENSMUSG00000052684	Jun	57.3854	44.138	51.6415	51.6169	57.7093	51.3803	4	95049034	95052222	-	3189	protein_coding	jun proto-oncogene [Source:MGI Symbol;Acc:MGI:96646]
ENSMUSG00000032216	Nedd4	59.1874	58.6225	59.2067	47.3619	42.1533	46.6453	9	72662346	72749852	+	10973	protein_coding	neural precursor cell expressed, developmentally down-regulated 4 [Source:MGI Symbol;Acc:MGI:97297]
ENSMUSG00000022427	Tomm22	49.0848	52.3113	48.2776	53.6824	56.9106	52.6895	15	79670861	79672862	+	1113	protein_coding	translocase of outer mitochondrial membrane 22 homolog (yeast) [Source:MGI Symbol;Acc:MGI:2450248]
ENSMUSG00000028860	Sytl1	50.8455	72.2507	66.6094	45.4783	43.3052	34.0082	4	133253090	133263113	-	2518	protein_coding	synaptotagmin-like 1 [Source:MGI Symbol;Acc:MGI:1933365]
ENSMUSG00000047419	Cmya5	84.6906	53.1594	64.5914	43.7786	29.8975	35.9457	13	93040713	93144724	-	11850	protein_coding	cardiomyopathy associated 5 [Source:MGI Symbol;Acc:MGI:1923719]
ENSMUSG00000021622	Ckmt2	78.4759	53.998	59.1152	22.3442	14.8251	83.1041	13	91853387	91876885	-	1486	protein_coding	creatine kinase, mitochondrial 2 [Source:MGI Symbol;Acc:MGI:1923972]
ENSMUSG00000038521	C1s1	40.8349	47.2588	37.8783	71.138	55.289	59.2074	6	124530345	124542359	-	3129	protein_coding	complement component 1, s subcomponent 1 [Source:MGI Symbol;Acc:MGI:1355312]
ENSMUSG00000018339	Gpx3	47.3925	42.4409	50.8975	63.9412	35.6162	71.2165	11	54902453	54910377	+	1813	protein_coding	glutathione peroxidase 3 [Source:MGI Symbol;Acc:MGI:105102]
ENSMUSG00000023904	Hcfc1r1	58.8559	59.5286	58.3759	38.9397	45.8204	49.7802	17	23673596	23675227	+	958	protein_coding	host cell factor C1 regulator 1 (XPO1-dependent) [Source:MGI Symbol;Acc:MGI:2663619]
ENSMUSG00000024474	Ik	52.1708	52.1894	51.1211	53.3513	48.8961	53.1477	18	36744656	36757639	+	1996	protein_coding	IK cytokine [Source:MGI Symbol;Acc:MGI:1345142]
ENSMUSG00000003346	Abhd17a	49.1583	52.4863	50.1851	43.4678	57.0415	58.504	10	80583654	80590341	-	1547	protein_coding	abhydrolase domain containing 17A [Source:MGI Symbol;Acc:MGI:106388]
ENSMUSG00000036492	Rnf39	37.5797	68.5438	64.4472	43.9229	47.675	47.7294	17	36942918	36947986	+	1795	protein_coding	ring finger protein 39 [Source:MGI Symbol;Acc:MGI:2156378]
ENSMUSG00000068874	Selenbp1	66.2747	90.9652	79.5072	29.8751	19.8534	23.2896	3	94933056	94944758	+	2273	protein_coding	selenium binding protein 1 [Source:MGI Symbol;Acc:MGI:96825]
ENSMUSG00000024835	Coro1b	37.2689	45.6885	41.7789	58.6321	62.1071	64.0906	19	4148619	4154035	+	2372	protein_coding	coronin, actin binding protein 1B [Source:MGI Symbol;Acc:MGI:1345963]
ENSMUSG00000022841	Ap2m1	41.8561	44.9004	42.6608	57.1585	64.5159	57.823	16	20535478	20544909	+	4172	protein_coding	adaptor-related protein complex 2, mu 1 subunit [Source:MGI Symbol;Acc:MGI:1298405]
ENSMUSG00000024066	Xdh	32.3099	41.9002	39.116	64.2534	66.0663	64.5954	17	73883908	73950182	-	4587	protein_coding	xanthine dehydrogenase [Source:MGI Symbol;Acc:MGI:98973]
ENSMUSG00000020088	Sar1a	53.903	51.747	51.5298	53.4208	47.7593	49.5458	10	61680299	61693297	+	3740	protein_coding	secretion associated Ras related GTPase 1A [Source:MGI Symbol;Acc:MGI:98230]
ENSMUSG00000030591	Psmd8	51.2075	61.9334	56.8036	43.316	46.8753	47.0318	7	29174188	29180701	-	3057	protein_coding	proteasome (prosome, macropain) 26S subunit, non-ATPase, 8 [Source:MGI Symbol;Acc:MGI:1888669]
ENSMUSG00000019433	Gipc1	39.4098	57.5968	52.4486	45.166	59.1518	53.0443	8	83652677	83664694	+	1729	protein_coding	GIPC PDZ domain containing family, member 1 [Source:MGI Symbol;Acc:MGI:1926252]
ENSMUSG00000022139	Mbnl2	61.567	52.6101	57.3474	49.0352	45.909	40.0581	14	120275669	120431697	+	4552	protein_coding	muscleblind like splicing factor 2 [Source:MGI Symbol;Acc:MGI:2145597]
ENSMUSG00000020149	Rab1a	47.6198	49.7866	48.2258	55.4929	56.4232	48.9299	11	20201432	20226856	+	3799	protein_coding	RAB1A, member RAS oncogene family [Source:MGI Symbol;Acc:MGI:97842]
ENSMUSG00000039269	2300002M23Rik	44.7953	101.499	69.1485	44.0069	21.4265	24.7739	17	35567450	35568952	+	1503	protein_coding	RIKEN cDNA 2300002M23 gene [Source:MGI Symbol;Acc:MGI:1916792]
ENSMUSG00000009863	Sdhb	60.6179	54.3114	56.4713	40.8454	37.8911	55.3413	4	140961203	140979193	+	2239	protein_coding	succinate dehydrogenase complex, subunit B, iron sulfur (Ip) [Source:MGI Symbol;Acc:MGI:1914930]
ENSMUSG00000044986	Tst	50.7432	74.5635	60.2039	38.4623	50.6814	30.0975	15	78399556	78405859	-	1096	protein_coding	thiosulfate sulfurtransferase, mitochondrial [Source:MGI Symbol;Acc:MGI:98852]
ENSMUSG00000025085	Ablim1	58.857	54.4618	59.7511	45.3606	39.9908	46.2059	19	57032733	57314919	-	11949	protein_coding	actin-binding LIM protein 1 [Source:MGI Symbol;Acc:MGI:1194500]
ENSMUSG00000032766	Gng11	75.8664	62.0029	61.3951	39.8725	24.3735	41.1063	6	4003904	4008445	+	919	protein_coding	guanine nucleotide binding protein (G protein), gamma 11 [Source:MGI Symbol;Acc:MGI:1913316]
ENSMUSG00000096001	2610528A11Rik	33.403	55.0884	37.9505	65.8228	34.7319	77.4149	14	37102140	37114022	-	828	protein_coding	RIKEN cDNA 2610528A11 gene [Source:MGI Symbol;Acc:MGI:1917295]
ENSMUSG00000087412	Gm15501	35.7488	41.1241	56.8962	73.6473	52.0897	44.8389	7	93178983	93184176	-	849	transcribed_processed_pseudogene	predicted pseudogene 15501 [Source:MGI Symbol;Acc:MGI:3704296]
ENSMUSG00000004864	Mapk13	32.1737	51.5532	43.1458	58.1807	69.6761	49.5835	17	28769307	28778698	+	1512	protein_coding	mitogen-activated protein kinase 13 [Source:MGI Symbol;Acc:MGI:1346864]
ENSMUSG00000005483	Dnajb1	37.9178	54.0086	40.1468	47.5493	67.9768	56.4305	8	83608193	83612653	+	3204	protein_coding	DnaJ heat shock protein family (Hsp40) member B1 [Source:MGI Symbol;Acc:MGI:1931874]
ENSMUSG00000021591	Glrx	31.411	53.1699	38.4323	72.82	58.0493	50.1333	13	75839868	75850154	+	5494	protein_coding	glutaredoxin [Source:MGI Symbol;Acc:MGI:2135625]
ENSMUSG00000113178	AC122507.1	69.8582	58.7671	63.4018	31.9452	25.628	53.7198	12	101221997	101222417	-	421	processed_pseudogene
ENSMUSG00000020485	Supt4a	43.882	52.9849	48.0014	51.4908	48.8197	57.3021	11	87737552	87743623	+	942	protein_coding	suppressor of Ty 4A [Source:MGI Symbol;Acc:MGI:107416]
ENSMUSG00000076258	Gm23935	48.7472	51.9522	82.1244	37.1325	43.1834	38.7273	16	11144125	11144181	+	57	miRNA	predicted gene, 23935 [Source:MGI Symbol;Acc:MGI:5453712]
ENSMUSG00000024646	Cyb5a	44.9816	50.125	49.0087	52.2431	52.4911	52.6895	18	84851338	84880401	+	2143	protein_coding	cytochrome b5 type A (microsomal) [Source:MGI Symbol;Acc:MGI:1926952]
ENSMUSG00000043445	Pgp	51.4885	54.413	47.7623	47.4868	48.0547	51.4645	17	24470473	24471591	+	1027	protein_coding	phosphoglycolate phosphatase [Source:MGI Symbol;Acc:MGI:1914328]
ENSMUSG00000044430	Klk12	14.4161	27.3785	25.6287	70.5518	99.5225	62.9109	7	43768897	43773585	+	1195	protein_coding	kallikrein related-peptidase 12 [Source:MGI Symbol;Acc:MGI:1916761]
ENSMUSG00000020840	Blmh	38.0163	53.6649	47.3473	57.3436	56.5259	47.3982	11	76924809	76987379	+	5891	protein_coding	bleomycin hydrolase [Source:MGI Symbol;Acc:MGI:1345186]
ENSMUSG00000031146	Plp2	41.8823	49.6243	45.5805	59.5314	59.0454	44.3665	X	7667941	7671390	-	1334	protein_coding	proteolipid protein 2 [Source:MGI Symbol;Acc:MGI:1298382]
ENSMUSG00000067279	Ppp1r3c	95.3841	46.2694	72.6744	42.2948	21.8474	21.4914	19	36731737	36736653	-	2719	protein_coding	protein phosphatase 1, regulatory (inhibitor) subunit 3C [Source:MGI Symbol;Acc:MGI:1858229]
ENSMUSG00000020440	Arf5	39.5644	46.7356	43.0093	44.9967	68.13	57.2444	6	28423560	28426602	+	1907	protein_coding	ADP-ribosylation factor 5 [Source:MGI Symbol;Acc:MGI:99434]
ENSMUSG00000037058	Paip2	58.274	62.1991	57.4231	42.5297	35.7436	43.4123	18	35598617	35617186	+	2789	protein_coding	polyadenylate-binding protein-interacting protein 2 [Source:MGI Symbol;Acc:MGI:1915119]
ENSMUSG00000006315	Tmem147	47.5143	49.4376	46.3953	44.7293	58.6219	52.5121	7	30727701	30729540	-	1112	protein_coding	transmembrane protein 147 [Source:MGI Symbol;Acc:MGI:1915011]
ENSMUSG00000062554	Gm12751	57.3333	59.1703	51.3673	50.3445	14.8592	65.7001	4	34354043	34354423	+	381	processed_pseudogene	predicted gene 12751 [Source:MGI Symbol;Acc:MGI:3651049]
ENSMUSG00000029767	Calu	52.5475	47.6396	49.7775	53.5134	45.7311	49.1709	6	29348069	29377110	+	4663	protein_coding	calumenin [Source:MGI Symbol;Acc:MGI:1097158]
ENSMUSG00000028447	Dctn3	48.7781	55.8757	50.6113	46.4647	49.6071	46.7665	4	41714798	41723170	-	1042	protein_coding	dynactin 3 [Source:MGI Symbol;Acc:MGI:1859251]
ENSMUSG00000038387	Rras	58.1915	50.7024	53.3527	36.6212	40.9511	58.221	7	45017961	45021647	+	1121	protein_coding	related RAS viral (r-ras) oncogene [Source:MGI Symbol;Acc:MGI:98179]
ENSMUSG00000060904	Arl1	48.8646	50.7262	48.7898	52.08	47.2931	49.9661	10	88730858	88744094	+	2369	protein_coding	ADP-ribosylation factor-like 1 [Source:MGI Symbol;Acc:MGI:99436]
ENSMUSG00000027133	Nop10	43.8654	51.2079	44.4552	45.4467	54.9703	57.3112	2	112261926	112263269	+	1109	protein_coding	NOP10 ribonucleoprotein [Source:MGI Symbol;Acc:MGI:1913431]
ENSMUSG00000079588	Tmem182	80.7418	62.7806	63.422	35.7662	22.7627	31.529	1	40805601	40856887	+	2716	protein_coding	transmembrane protein 182 [Source:MGI Symbol;Acc:MGI:1923725]
ENSMUSG00000025823	Pdia4	44.0661	38.1662	42.4919	61.0417	56.278	54.8101	6	47796141	47813430	-	2399	protein_coding	protein disulfide isomerase associated 4 [Source:MGI Symbol;Acc:MGI:104864]
ENSMUSG00000031734	Irx3	51.5849	42.3672	63.7721	33.7177	41.2768	63.5609	8	91798525	91802067	-	2762	protein_coding	Iroquois related homeobox 3 [Source:MGI Symbol;Acc:MGI:1197522]
ENSMUSG00000018326	Ywhab	48.5112	49.3583	52.2431	46.6764	52.2204	46.8841	2	163994960	164018588	+	3382	protein_coding	tyrosine 3-monooxygenase/tryptophan 5-monooxygenase activation protein, beta polypeptide [Source:MGI Symbol;Acc:MGI:1891917]
ENSMUSG00000034659	Tmem109	54.9933	56.4271	57.8102	42.2489	43.325	41.0799	19	10870660	10882001	-	3798	protein_coding	transmembrane protein 109 [Source:MGI Symbol;Acc:MGI:1915789]
ENSMUSG00000029392	Rilpl1	68.7293	52.6105	62.011	41.302	33.2458	37.9468	5	124493080	124531391	-	2463	protein_coding	Rab interacting lysosomal protein-like 1 [Source:MGI Symbol;Acc:MGI:1922945]
ENSMUSG00000062081	Gm6055	46.5925	44.8563	49.0084	56.2268	46.4507	52.6687	14	48079375	48079752	-	378	processed_pseudogene	predicted gene 6055 [Source:MGI Symbol;Acc:MGI:3648620]
ENSMUSG00000059898	Dsc3	26.0852	42.5469	35.7246	64.9222	73.8406	52.2419	18	19960930	20002351	-	5403	protein_coding	desmocollin 3 [Source:MGI Symbol;Acc:MGI:1194993]
ENSMUSG00000020476	Dbnl	45.0617	51.081	49.353	44.9407	55.9581	48.8759	11	5788488	5800962	+	2346	protein_coding	drebrin-like [Source:MGI Symbol;Acc:MGI:700006]
ENSMUSG00000020427	Igfbp3	17.099	15.3664	17.2943	59.1407	111.264	74.9436	11	7206086	7213923	-	3130	protein_coding	insulin-like growth factor binding protein 3 [Source:MGI Symbol;Acc:MGI:96438]
ENSMUSG00000032966	Fkbp1a	59.3057	47.9482	50.9479	45.8097	42.9601	47.5462	2	151542483	151561692	+	3857	protein_coding	FK506 binding protein 1a [Source:MGI Symbol;Acc:MGI:95541]
ENSMUSG00000013160	Atp6v0d1	49.4469	53.9959	53.2983	47.3411	46.3554	43.6711	8	105524465	105566047	-	1793	protein_coding	ATPase, H+ transporting, lysosomal V0 subunit D1 [Source:MGI Symbol;Acc:MGI:1201778]
ENSMUSG00000037188	Grhl3	45.9969	65.1104	61.2799	38.9723	48.4378	34.1534	4	135541888	135573630	-	2789	protein_coding	grainyhead-like 3 (Drosophila) [Source:MGI Symbol;Acc:MGI:2655333]
ENSMUSG00000092341	Malat1	61.0207	43.1935	57.4223	57.7028	39.5497	34.5941	19	5795690	5802672	-	6983	lincRNA	metastasis associated lung adenocarcinoma transcript 1 (non-coding RNA) [Source:MGI Symbol;Acc:MGI:1919539]
ENSMUSG00000100007	Gm5527	45.8104	46.4978	48.4802	44.0262	55.4658	53.198	1	52584518	52585159	+	642	processed_pseudogene	predicted gene 5527 [Source:MGI Symbol;Acc:MGI:3646585]
ENSMUSG00000030157	Clec2d	46.5888	46.7387	45.1186	63.1433	40.5508	51.2987	6	129180615	129186534	+	1213	protein_coding	C-type lectin domain family 2, member d [Source:MGI Symbol;Acc:MGI:2135589]
ENSMUSG00000051223	Bzw1	34.9781	42.7411	37.6609	58.7021	64.5728	54.1772	1	58392898	58407353	+	4033	protein_coding	basic leucine zipper and W2 domains 1 [Source:MGI Symbol;Acc:MGI:1914132]
ENSMUSG00000041355	Ssr2	36.051	40.8185	39.1658	58.8563	60.3699	57.5594	3	88575876	88588419	+	1864	protein_coding	signal sequence receptor, beta [Source:MGI Symbol;Acc:MGI:1913506]
ENSMUSG00000042079	Hnrnpf	40.3766	49.5024	43.6863	52.2858	57.1674	49.551	6	117900324	117925622	+	3047	protein_coding	heterogeneous nuclear ribonucleoprotein F [Source:MGI Symbol;Acc:MGI:2138741]
ENSMUSG00000095870	Lce1k	43.4568	82.7019	68.6518	46.7552	13.8604	37.0642	3	92806291	92807891	-	663	protein_coding	late cornified envelope 1K [Source:MGI Symbol;Acc:MGI:3702534]
ENSMUSG00000024997	Prdx3	61.4026	55.5829	51.7193	39.5303	34.668	49.4842	19	60864051	60874556	-	1478	protein_coding	peroxiredoxin 3 [Source:MGI Symbol;Acc:MGI:88034]
ENSMUSG00000062353	Gm15772	45.1875	47.5444	46.5016	55.773	48.6109	48.5918	5	3236431	3236868	+	438	processed_pseudogene	predicted gene 15772 [Source:MGI Symbol;Acc:MGI:3805541]
ENSMUSG00000059900	Tmem40	40.8698	61.4886	57.1756	42.1992	47.3313	43.0709	6	115729131	115762410	-	2140	protein_coding	transmembrane protein 40 [Source:MGI Symbol;Acc:MGI:2137870]
ENSMUSG00000021546	Hnrnpk	42.0534	46.167	45.6938	49.4618	60.2675	48.201	13	58391142	58403343	-	6466	protein_coding	heterogeneous nuclear ribonucleoprotein K [Source:MGI Symbol;Acc:MGI:99894]
ENSMUSG00000017493	Igfbp4	43.0767	42.4628	33.233	68.359	47.2021	57.4764	11	99041244	99054392	+	4416	protein_coding	insulin-like growth factor binding protein 4 [Source:MGI Symbol;Acc:MGI:96439]
ENSMUSG00000081604	Gm11518	29.3304	35.909	38.2881	100.099	46.5141	41.4475	11	94037218	94037628	-	411	processed_pseudogene	predicted gene 11518 [Source:MGI Symbol;Acc:MGI:3650306]
ENSMUSG00000031375	Bgn	45.6983	36.2741	37.6655	60.8826	53.9457	56.7832	X	73483602	73495933	+	6099	protein_coding	biglycan [Source:MGI Symbol;Acc:MGI:88158]
ENSMUSG00000025351	Cd63	49.9689	47.9441	43.7396	53.7234	44.7011	50.8014	10	128900989	128912822	+	3682	protein_coding	CD63 antigen [Source:MGI Symbol;Acc:MGI:99529]
ENSMUSG00000056501	Cebpb	33.7376	32.6462	39.6007	40.606	74.8747	68.6784	2	167688915	167690418	+	1504	protein_coding	CCAAT/enhancer binding protein (C/EBP), beta [Source:MGI Symbol;Acc:MGI:88373]
ENSMUSG00000041881	Ndufa7	55.4135	53.9118	48.2179	42.721	40.5901	48.5551	17	33824591	33838316	+	1701	protein_coding	NADH dehydrogenase (ubiquinone) 1 alpha subcomplex, 7 (B14.5a) [Source:MGI Symbol;Acc:MGI:1913666]
ENSMUSG00000051234	Rnf7	50.4408	51.1433	48.4863	46.9504	47.7278	44.3787	9	96470937	96478675	-	1328	protein_coding	ring finger protein 7 [Source:MGI Symbol;Acc:MGI:1337096]
ENSMUSG00000024387	Csnk2b	46.0978	54.9488	53.2681	45.9935	44.9342	43.8666	17	35116196	35122053	-	2067	protein_coding	casein kinase 2, beta polypeptide [Source:MGI Symbol;Acc:MGI:88548]
ENSMUSG00000045665	Mfsd5	40.539	50.8882	49.2842	47.7652	53.129	47.4123	15	102279456	102281744	+	1742	protein_coding	major facilitator superfamily domain containing 5 [Source:MGI Symbol;Acc:MGI:2145901]
ENSMUSG00000003534	Ddr1	21.6872	28.6435	29.0928	48.1589	95.54	65.7032	17	35681567	35704621	-	4774	protein_coding	discoidin domain receptor family, member 1 [Source:MGI Symbol;Acc:MGI:99216]
ENSMUSG00000072214	2022-09-05	46.1641	59.2372	60.0302	41.8974	42.0079	39.0849	16	18621811	18629938	-	2127	protein_coding	septin 5 [Source:MGI Symbol;Acc:MGI:1195461]
ENSMUSG00000031532	Saraf	51.4459	47.8929	50.2069	47.3467	43.5174	47.8927	8	34154575	34170821	+	2929	protein_coding	store-operated calcium entry-associated regulatory factor [Source:MGI Symbol;Acc:MGI:1915137]
ENSMUSG00000024098	Twsg1	45.484	50.3241	48.5434	48.4324	50.2714	45.0781	17	65923066	65951187	-	4046	protein_coding	twisted gastrulation BMP signaling modulator 1 [Source:MGI Symbol;Acc:MGI:2137520]
ENSMUSG00000059119	Nap1l4	54.0354	48.488	53.0018	44.7647	41.422	45.9444	7	143513579	143549106	-	3094	protein_coding	nucleosome assembly protein 1-like 4 [Source:MGI Symbol;Acc:MGI:1316687]
ENSMUSG00000026678	Rgs5	53.8246	51.3872	51.7925	48.8768	33.0288	48.7048	1	169655501	169695813	+	4546	protein_coding	regulator of G-protein signaling 5 [Source:MGI Symbol;Acc:MGI:1098434]
ENSMUSG00000022404	Slc25a17	38.9267	51.8883	43.3761	55.8923	54.6826	42.8244	15	81318921	81360765	-	1667	protein_coding	solute carrier family 25 (mitochondrial carrier, peroxisomal membrane protein), member 17 [Source:MGI Symbol;Acc:MGI:1342248]
ENSMUSG00000107002	0610012G03Rik	45.2917	53.4147	52.0734	43.8508	46.021	46.8096	16	31947050	31948494	-	1445	protein_coding	RIKEN cDNA 0610012G03 gene [Source:MGI Symbol;Acc:MGI:1913301]
ENSMUSG00000058569	Tmed9	39.3292	46.7903	43.0074	51.2496	56.8781	50.2006	13	55573732	55597697	+	3439	protein_coding	transmembrane p24 trafficking protein 9 [Source:MGI Symbol;Acc:MGI:1914761]
ENSMUSG00000031029	Eif3f	47.2574	47.7955	45.8025	45.6506	52.1211	48.5798	7	108934417	108942951	+	2891	protein_coding	eukaryotic translation initiation factor 3, subunit F [Source:MGI Symbol;Acc:MGI:1913335]
ENSMUSG00000028419	Chmp5	43.1415	55.7491	50.3889	49.291	44.4002	44.063	4	40948407	40965303	+	1519	protein_coding	charged multivesicular body protein 5 [Source:MGI Symbol;Acc:MGI:1924209]
ENSMUSG00000028788	Ptp4a2	61.9971	50.2723	52.5977	39.9644	36.7691	44.6571	4	129811219	129850003	+	4377	protein_coding	protein tyrosine phosphatase 4a2 [Source:MGI Symbol;Acc:MGI:1277117]
ENSMUSG00000031740	Mmp2	40.0084	48.1875	40.0636	58.5228	50.2246	48.7916	8	92827291	92853420	+	3371	protein_coding	matrix metallopeptidase 2 [Source:MGI Symbol;Acc:MGI:97009]
ENSMUSG00000030713	Klk7	29.6187	39.1174	31.7977	54.6823	55.1825	75.212	7	43811294	43816359	+	1895	protein_coding	kallikrein related-peptidase 7 (chymotryptic, stratum corneum) [Source:MGI Symbol;Acc:MGI:1346336]
ENSMUSG00000053559	Smagp	40.7262	52.4467	56.6015	46.4116	43.6826	45.5161	15	100621342	100636865	-	1142	protein_coding	small cell adhesion glycoprotein [Source:MGI Symbol;Acc:MGI:2448476]
ENSMUSG00000019087	Atp6ap1	45.1208	46.4208	44.582	50.3025	51.7074	46.6327	X	74297097	74304721	+	3026	protein_coding	ATPase, H+ transporting, lysosomal accessory protein 1 [Source:MGI Symbol;Acc:MGI:109629]
ENSMUSG00000011257	Pabpc4	70.3153	53.2183	59.0488	29.4002	30.6027	41.4433	4	123262351	123298925	+	4027	protein_coding	poly(A) binding protein, cytoplasmic 4 [Source:MGI Symbol;Acc:MGI:2385206]
ENSMUSG00000022403	St13	58.9958	49.5586	59.8825	37.4366	36.6216	41.3248	15	81363669	81400077	-	3457	protein_coding	suppression of tumorigenicity 13 [Source:MGI Symbol;Acc:MGI:1917606]
ENSMUSG00000030603	Psmc4	46.0282	42.4408	44.7107	47.7236	55.837	46.7529	7	28041707	28050101	-	2163	protein_coding	proteasome (prosome, macropain) 26S subunit, ATPase, 4 [Source:MGI Symbol;Acc:MGI:1346093]
ENSMUSG00000040681	Hmgn1	39.2438	47.0359	42.0685	48.9821	58.5115	47.5207	16	96120618	96127729	-	3221	protein_coding	high mobility group nucleosomal binding domain 1 [Source:MGI Symbol;Acc:MGI:96120]
ENSMUSG00000095098	Ccdc85b	48.363	49.7232	51.9249	43.5156	42.7083	47.1214	19	5456789	5457397	-	609	protein_coding	coiled-coil domain containing 85B [Source:MGI Symbol;Acc:MGI:2147607]
ENSMUSG00000027377	Mall	44.0687	63.977	60.126	35.7199	39.695	39.47	2	127704386	127729932	-	2006	protein_coding	mal, T cell differentiation protein-like [Source:MGI Symbol;Acc:MGI:2385152]
ENSMUSG00000074800	Gm4149	36.862	39.9751	41.3186	75.2489	45.4834	43.7628	13	75644896	75645171	+	276	processed_pseudogene	predicted pseudogene 4149 [Source:MGI Symbol;Acc:MGI:3782325]
ENSMUSG00000027131	Emc4	41.5691	50.3504	46.0592	47.0709	48.0436	49.5288	2	112363011	112368027	-	1052	protein_coding	ER membrane protein complex subunit 4 [Source:MGI Symbol;Acc:MGI:1915282]
ENSMUSG00000025481	Urah	4.07405	5.25488	4.11791	39.398	129.254	99.9662	7	140835018	140837966	+	1427	protein_coding	urate (5-hydroxyiso-) hydrolase [Source:MGI Symbol;Acc:MGI:1916142]
ENSMUSG00000001349	Cnn1	71.4177	62.9676	76.391	25.8832	21.3968	23.687	9	22099216	22109630	+	2736	protein_coding	calponin 1 [Source:MGI Symbol;Acc:MGI:104979]
ENSMUSG00000021025	Nfkbia	28.5426	36.5487	31.2712	43.465	71.6268	70.2102	12	55489410	55492647	-	1610	protein_coding	nuclear factor of kappa light polypeptide gene enhancer in B cells inhibitor, alpha [Source:MGI Symbol;Acc:MGI:104741]
ENSMUSG00000050732	Vamp8	41.1013	49.7672	43.442	48.4261	47.0243	51.887	6	72385223	72390703	-	2311	protein_coding	vesicle-associated membrane protein 8 [Source:MGI Symbol;Acc:MGI:1336882]
ENSMUSG00000000743	Chmp1a	41.9636	52.3461	49.2966	46.7093	50.0892	41.1919	8	123204264	123212763	-	3272	protein_coding	charged multivesicular body protein 1A [Source:MGI Symbol;Acc:MGI:1920159]
ENSMUSG00000020869	Lrrc59	32.1476	34.458	35.3761	50.1646	70.1004	59.0258	11	94629767	94645216	+	3073	protein_coding	leucine rich repeat containing 59 [Source:MGI Symbol;Acc:MGI:2138133]
ENSMUSG00000063904	4930533O14Rik	38.6528	49.151	49.1863	46.6423	53.9294	43.3577	19	4907229	4928287	-	2683	protein_coding	dipeptidylpeptidase 3 [Source:MGI Symbol;Acc:MGI:1922471]
ENSMUSG00000028656	Cap1	36.4957	41.0232	39.8647	47.2625	60.2331	55.8951	4	122859047	122886056	-	3494	protein_coding	CAP, adenylate cyclase-associated protein 1 (yeast) [Source:MGI Symbol;Acc:MGI:88262]
ENSMUSG00000024132	Eci1	63.5923	52.5781	53.633	30.7169	27.1114	52.9503	17	24426683	24439316	+	1091	protein_coding	enoyl-Coenzyme A delta isomerase 1 [Source:MGI Symbol;Acc:MGI:94871]
ENSMUSG00000033295	Ptprf	34.9298	42.2595	45.5038	40.1182	70.7162	46.6857	4	118208213	118291405	-	9148	protein_coding	protein tyrosine phosphatase, receptor type, F [Source:MGI Symbol;Acc:MGI:102695]
ENSMUSG00000029661	Col1a2	45.2795	51.5101	42.9618	56.8414	41.8959	41.6669	6	4504814	4541544	+	12426	protein_coding	collagen, type I, alpha 2 [Source:MGI Symbol;Acc:MGI:88468]
ENSMUSG00000078636	Gm7336	48.1951	50.9027	53.8005	66.2497	26.6058	34.2802	7	51746647	51747878	+	1232	processed_pseudogene	predicted gene 7336 [Source:MGI Symbol;Acc:MGI:3644851]
ENSMUSG00000028070	Naxe	50.4684	53.9169	50.8409	41.3268	36.2351	47.2004	3	88056520	88058495	-	908	protein_coding	NAD(P)HX epimerase [Source:MGI Symbol;Acc:MGI:2180167]
ENSMUSG00000037152	Ndufc1	59.532	50.2864	49.6323	38.6088	36.0574	45.1883	3	51404677	51408988	-	1495	protein_coding	NADH dehydrogenase (ubiquinone) 1, subcomplex unknown, 1 [Source:MGI Symbol;Acc:MGI:1913627]
ENSMUSG00000071532	Gm10335	34.0701	46.1296	40.967	63.881	47.9493	46.0999	10	14523078	14523545	+	468	processed_pseudogene	predicted gene 10335 [Source:MGI Symbol;Acc:MGI:3641693]
ENSMUSG00000027257	Pacsin3	64.966	48.9325	58.2003	35.1067	33.6006	38.233	2	91255954	91264679	+	4327	protein_coding	protein kinase C and casein kinase substrate in neurons 3 [Source:MGI Symbol;Acc:MGI:1891410]
ENSMUSG00000068749	Psma5	40.9354	45.3039	38.678	46.9656	52.3906	54.388	3	108256926	108279974	+	1321	protein_coding	proteasome (prosome, macropain) subunit, alpha type 5 [Source:MGI Symbol;Acc:MGI:1347009]
ENSMUSG00000075700	Selenot	48.8934	46.7199	46.6248	47.0465	46.409	42.935	3	58576636	58593133	+	3436	protein_coding	selenoprotein T [Source:MGI Symbol;Acc:MGI:1916477]
ENSMUSG00000017817	Jph2	75.0468	56.3384	62.7898	27.8249	24.8267	31.7833	2	163336242	163397993	-	4255	protein_coding	junctophilin 2 [Source:MGI Symbol;Acc:MGI:1891496]
ENSMUSG00000022235	Cmbl	70.3524	60.4032	56.6522	37.9905	23.6524	29.4739	15	31568791	31590119	+	1228	protein_coding	carboxymethylenebutenolidase-like (Pseudomonas) [Source:MGI Symbol;Acc:MGI:1916824]
ENSMUSG00000037706	Cd81	45.5687	43.6648	41.9459	48.2608	43.6889	55.3937	7	143052739	143067934	+	2879	protein_coding	CD81 antigen [Source:MGI Symbol;Acc:MGI:1096398]
ENSMUSG00000056629	Fkbp2	48.1635	43.4401	47.0948	49.4155	40.2199	50.0681	19	6977741	6980461	-	663	protein_coding	FK506 binding protein 2 [Source:MGI Symbol;Acc:MGI:95542]
ENSMUSG00000040652	Oaz2	73.5286	57.938	55.6448	33.167	26.2885	31.6207	9	65668001	65690300	+	2990	protein_coding	ornithine decarboxylase antizyme 2 [Source:MGI Symbol;Acc:MGI:109492]
ENSMUSG00000020780	Srp68	53.8991	57.4476	59.3692	35.4112	35.4334	36.4914	11	116245166	116274217	-	2737	protein_coding	signal recognition particle 68 [Source:MGI Symbol;Acc:MGI:1917447]
ENSMUSG00000012350	Ehf	34.5139	52.7477	47.1553	36.693	58.7112	47.3643	2	103263433	103303278	-	5576	protein_coding	ets homologous factor [Source:MGI Symbol;Acc:MGI:1270840]
ENSMUSG00000027828	Ssr3	45.4423	42.3131	41.9446	51.747	48.5172	46.8714	3	65379655	65392623	-	4172	protein_coding	signal sequence receptor, gamma [Source:MGI Symbol;Acc:MGI:1914687]
ENSMUSG00000031987	Egln1	53.0122	44.7458	46.2378	39.8253	47.7817	45.1731	8	124908587	124949324	-	3594	protein_coding	egl-9 family hypoxia-inducible factor 1 [Source:MGI Symbol;Acc:MGI:1932286]
ENSMUSG00000006369	Fbln1	41.8374	49.8073	52.877	43.8021	39.5779	48.6681	15	85205949	85286535	+	4368	protein_coding	fibulin 1 [Source:MGI Symbol;Acc:MGI:95487]
ENSMUSG00000071659	Hnrnpul2	44.0465	43.5167	44.3893	46.2896	51.3197	46.8873	19	8819401	8834142	+	5726	protein_coding	heterogeneous nuclear ribonucleoprotein U-like 2 [Source:MGI Symbol;Acc:MGI:1915943]
ENSMUSG00000019761	Krt10	8.97819	4.36053	9.44623	62.9927	136.987	53.0379	11	99385254	99389364	-	2114	protein_coding	keratin 10 [Source:MGI Symbol;Acc:MGI:96685]
ENSMUSG00000078429	Ctdsp2	46.3305	48.1689	47.6172	46.8408	42.8215	43.603	10	126978717	126999975	+	5524	protein_coding	CTD (carboxy-terminal domain, RNA polymerase II, polypeptide A) small phosphatase 2 [Source:MGI Symbol;Acc:MGI:1098748]
ENSMUSG00000032418	Me1	50.4683	59.3059	56.0884	40.5884	32.3247	36.3032	9	86581371	86695953	-	3848	protein_coding	malic enzyme 1, NADP(+)-dependent, cytosolic [Source:MGI Symbol;Acc:MGI:97043]
ENSMUSG00000069744	Psmb3	40.4243	43.7961	39.3627	49.9231	50.8166	50.451	11	97703399	97713500	+	2300	protein_coding	proteasome (prosome, macropain) subunit, beta type 3 [Source:MGI Symbol;Acc:MGI:1347014]
ENSMUSG00000040170	Fmo2	54.4004	87.1629	74.9957	25.5025	15.1034	17.4056	1	162874317	162898726	-	5609	protein_coding	flavin containing monooxygenase 2 [Source:MGI Symbol;Acc:MGI:1916776]
ENSMUSG00000013076	Amotl1	67.2305	50.2493	60.195	35.3889	25.3548	35.6327	9	14541966	14645056	-	10064	protein_coding	angiomotin-like 1 [Source:MGI Symbol;Acc:MGI:1922973]
ENSMUSG00000041560	Nop53	40.4807	48.6937	45.3846	43.3957	49.2035	46.3597	7	15936183	15946074	-	3847	protein_coding	NOP53 ribosome biogenesis factor [Source:MGI Symbol;Acc:MGI:2154441]
ENSMUSG00000027940	Tpm3	55.9617	48.4846	47.0572	36.2107	40.5456	45.1341	3	90072649	90100902	+	6085	protein_coding	tropomyosin 3, gamma [Source:MGI Symbol;Acc:MGI:1890149]
ENSMUSG00000032288	Imp3	43.8579	46.1084	43.7626	45.4311	48.8384	45.3464	9	56937475	56938398	+	924	protein_coding	IMP3, U3 small nucleolar ribonucleoprotein [Source:MGI Symbol;Acc:MGI:1916119]
ENSMUSG00000025364	Pa2g4	40.415	47.8988	43.4052	44.5824	56.8985	39.9271	10	128557766	128565987	-	2804	protein_coding	proliferation-associated 2G4 [Source:MGI Symbol;Acc:MGI:894684]
ENSMUSG00000008035	Mid1ip1	40.4977	47.8972	46.6864	43.3075	49.7573	44.9383	X	10715013	10719690	+	2128	protein_coding	Mid1 interacting protein 1 (gastrulation specific G12-like (zebrafish)) [Source:MGI Symbol;Acc:MGI:1915291]
ENSMUSG00000079523	Tmsb10	33.8697	40.7254	35.9832	52.2849	49.4477	60.6147	6	72957347	72958748	-	1276	protein_coding	thymosin, beta 10 [Source:MGI Symbol;Acc:MGI:109146]
ENSMUSG00000025950	Idh1	33.7846	44.2635	37.075	60.1988	52.35	44.521	1	65158616	65186500	-	2771	protein_coding	isocitrate dehydrogenase 1 (NADP+), soluble [Source:MGI Symbol;Acc:MGI:96413]
ENSMUSG00000025791	Pgm2	68.4312	55.2678	51.6912	32.2749	25.7016	38.7413	4	99929414	99987294	+	2921	protein_coding	phosphoglucomutase 2 [Source:MGI Symbol;Acc:MGI:97565]
ENSMUSG00000026223	Itm2c	38.3715	40.7831	37.504	48.0955	48.4024	58.6881	1	85894281	85908675	+	2491	protein_coding	integral membrane protein 2C [Source:MGI Symbol;Acc:MGI:1927594]
ENSMUSG00000084416	Rpl10a-ps1	31.2436	34.5438	36.0166	76.4581	47.4225	45.9807	1	64993951	64994604	-	654	processed_pseudogene	ribosomal protein L10A, pseudogene 1 [Source:MGI Symbol;Acc:MGI:3705885]
ENSMUSG00000042895	Abra	66.9598	46.109	60.7082	29.43	29.9184	38.4117	15	41865293	41869720	-	1762	protein_coding	actin-binding Rho activating protein [Source:MGI Symbol;Acc:MGI:2444891]
ENSMUSG00000035923	Myf6	68.8767	45.2288	53.7417	38.7532	22.4773	41.9799	10	107492853	107494737	-	1263	protein_coding	myogenic factor 6 [Source:MGI Symbol;Acc:MGI:97253]
ENSMUSG00000008036	Ap2s1	40.221	45.5561	43.2018	45.5328	49.5524	46.8281	7	16738410	16749294	+	1472	protein_coding	adaptor-related protein complex 2, sigma 1 subunit [Source:MGI Symbol;Acc:MGI:2141861]
ENSMUSG00000081406	Rps6-ps4	38.3588	38.3374	38.4447	69.7287	45.7284	40.2618	2	75191073	75191822	-	750	processed_pseudogene	ribosomal protein S6, pseudogene 4 [Source:MGI Symbol;Acc:MGI:3650907]
ENSMUSG00000044408	Sptssa	30.9201	38.6064	30.7388	61.2332	59.8338	49.2503	12	54645392	54656573	-	1518	protein_coding	serine palmitoyltransferase, small subunit A [Source:MGI Symbol;Acc:MGI:1913399]
ENSMUSG00000031770	Herpud1	48.7758	42.9924	40.7057	39.7856	49.7637	47.5772	8	94386438	94395377	+	2333	protein_coding	homocysteine-inducible, endoplasmic reticulum stress-inducible, ubiquitin-like domain member 1 [Source:MGI Symbol;Acc:MGI:1927406]
ENSMUSG00000055681	Cope	38.6678	42.1928	41.8975	51.5514	47.8514	46.6934	8	70302518	70312993	+	3353	protein_coding	coatomer protein complex, subunit epsilon [Source:MGI Symbol;Acc:MGI:1891702]
ENSMUSG00000022215	Fitm1	65.4227	49.7834	60.18	28.805	23.6662	40.9624	14	55575617	55576952	+	969	protein_coding	fat storage-inducing transmembrane protein 1 [Source:MGI Symbol;Acc:MGI:1915930]
ENSMUSG00000002767	Mrpl2	50.749	46.946	51.0331	36.2935	43.7592	40.0126	17	46646229	46650139	+	1170	protein_coding	mitochondrial ribosomal protein L2 [Source:MGI Symbol;Acc:MGI:1351622]
ENSMUSG00000027566	Psma7	40.0619	44.5286	40.3156	47.8556	46.9535	48.985	2	180036373	180042433	-	3072	protein_coding	proteasome (prosome, macropain) subunit, alpha type 7 [Source:MGI Symbol;Acc:MGI:1347070]
ENSMUSG00000057411	Fam173a	47.6635	51.3447	46.4374	40.9531	39.1782	43.1079	17	25790508	25792284	-	800	protein_coding	family with sequence similarity 173, member A [Source:MGI Symbol;Acc:MGI:2384888]
ENSMUSG00000014867	Surf4	40.5326	39.3193	37.869	49.39	52.0399	48.7336	2	26920040	26933928	-	3281	protein_coding	surfeit gene 4 [Source:MGI Symbol;Acc:MGI:98445]
ENSMUSG00000041453	Rpl21	44.7466	55.4466	38.8431	45.3918	37.4648	45.6437	5	146832890	146837032	+	3400	protein_coding	ribosomal protein L21 [Source:MGI Symbol;Acc:MGI:1278340]
ENSMUSG00000065126	Snord104	41.5262	47.0802	39.8391	28.3467	49.8152	60.6902	11	106500993	106501062	+	70	snoRNA	small nucleolar RNA, C/D box 104 [Source:MGI Symbol;Acc:MGI:3819515]
ENSMUSG00000032301	Psma4	43.5772	44.1148	39.3138	44.3181	45.646	50.1208	9	54950790	54958030	+	2370	protein_coding	proteasome (prosome, macropain) subunit, alpha type 4 [Source:MGI Symbol;Acc:MGI:1347060]
ENSMUSG00000037206	Islr	66.1584	50.0919	51.1893	30.3871	22.8184	46.0074	9	58156268	58204306	-	2686	protein_coding	immunoglobulin superfamily containing leucine-rich repeat [Source:MGI Symbol;Acc:MGI:1349645]
ENSMUSG00000042845	Wfdc12	20.0224	30.8761	22.8753	81.8742	53.2521	57.719	2	164189231	164190608	-	775	protein_coding	WAP four-disulfide core domain 12 [Source:MGI Symbol;Acc:MGI:2183434]
ENSMUSG00000033685	Ucp2	49.8793	42.4525	40.8993	38.9403	46.1193	48.3187	7	100493337	100502020	+	6989	protein_coding	uncoupling protein 2 (mitochondrial, proton carrier) [Source:MGI Symbol;Acc:MGI:109354]
ENSMUSG00000028048	Gba	34.5455	48.3784	41.0222	47.4894	55.0357	40.0551	3	89202928	89208966	+	2559	protein_coding	glucosidase, beta, acid [Source:MGI Symbol;Acc:MGI:95665]
ENSMUSG00000027470	Mylk2	77.441	58.0886	66.1678	23.7583	22.2846	18.6445	2	152911352	152923068	+	2951	protein_coding	myosin, light polypeptide kinase 2, skeletal muscle [Source:MGI Symbol;Acc:MGI:2139434]
ENSMUSG00000032479	Map4	58.9765	48.3208	54.9652	33.9789	30.1173	40.0081	9	109931460	110083955	+	15143	protein_coding	microtubule-associated protein 4 [Source:MGI Symbol;Acc:MGI:97178]
ENSMUSG00000063767	S100a7a	28.964	53.1735	39.962	40.6365	58.6316	44.8563	3	90654017	90658669	+	1377	protein_coding	S100 calcium binding protein A7A [Source:MGI Symbol;Acc:MGI:2687194]
ENSMUSG00000033379	Atp6v0b	43.9355	47.2269	43.8016	44.3744	42.4644	44.0464	4	117884326	117887333	-	2051	protein_coding	ATPase, H+ transporting, lysosomal V0 subunit B [Source:MGI Symbol;Acc:MGI:1890510]
ENSMUSG00000030281	Il17rc	38.2663	43.3814	46.0327	42.1964	49.3643	45.4393	6	113471427	113483140	+	2671	protein_coding	interleukin 17 receptor C [Source:MGI Symbol;Acc:MGI:2159336]
ENSMUSG00000042682	Selenok	44.2169	46.5501	42.1091	46.963	38.8548	45.9011	14	29968308	29975662	+	1891	protein_coding	selenoprotein K [Source:MGI Symbol;Acc:MGI:1931466]
ENSMUSG00000002064	Sdf2	44.6662	55.2027	48.3525	43.3672	34.9315	37.8288	11	78245746	78255496	+	1515	protein_coding	stromal cell derived factor 2 [Source:MGI Symbol;Acc:MGI:108019]
ENSMUSG00000026457	Adipor1	48.9661	48.7035	51.652	36.9958	38.8934	39.0227	1	134415378	134433351	+	5025	protein_coding	adiponectin receptor 1 [Source:MGI Symbol;Acc:MGI:1919924]
ENSMUSG00000039648	Kyat1	48.2025	68.3839	61.2476	35.1643	26.091	24.7934	2	30185124	30205847	-	2923	protein_coding	kynurenine aminotransferase 1 [Source:MGI Symbol;Acc:MGI:1917516]
ENSMUSG00000053565	Eif3k	37.1545	44.9654	40.3669	46.2195	49.6914	45.1236	7	28971372	28981864	-	2698	protein_coding	eukaryotic translation initiation factor 3, subunit K [Source:MGI Symbol;Acc:MGI:1921080]
ENSMUSG00000035890	Rnf126	33.4906	35.3173	35.0111	41.7142	62.7161	54.9469	10	79758515	79766952	-	1704	protein_coding	ring finger protein 126 [Source:MGI Symbol;Acc:MGI:1917544]
ENSMUSG00000061032	Rrp1	40.8388	43.3541	42.4267	42.4035	49.3717	44.3087	10	78400384	78413043	-	3337	protein_coding	ribosomal RNA processing 1 homolog (S. cerevisiae) [Source:MGI Symbol;Acc:MGI:1203500]
ENSMUSG00000031311	Nono	38.9369	41.8126	39.4179	42.9862	52.0422	47.3146	X	101429318	101448591	+	4375	protein_coding	non-POU-domain-containing, octamer binding protein [Source:MGI Symbol;Acc:MGI:1855692]
ENSMUSG00000052456	Asna1	36.1343	42.1001	38.3882	45.4311	50.4679	49.9757	8	85017931	85025281	-	1881	protein_coding	arsA arsenite transporter, ATP-binding, homolog 1 (bacterial) [Source:MGI Symbol;Acc:MGI:1928379]
ENSMUSG00000024393	Prrc2a	42.2434	41.5097	42.9597	37.5075	49.8839	47.8614	17	35149076	35164897	-	7631	protein_coding	proline-rich coiled-coil 2A [Source:MGI Symbol;Acc:MGI:1915467]
ENSMUSG00000063787	Chchd1	52.2	44.9777	47.4979	38.5648	36.9173	41.2378	14	20703006	20704425	+	909	protein_coding	coiled-coil-helix-coiled-coil-helix domain containing 1 [Source:MGI Symbol;Acc:MGI:1913371]
ENSMUSG00000040713	Creg1	49.1723	57.044	53.8257	39.3158	28.05	33.574	1	165763746	165775308	+	2362	protein_coding	cellular repressor of E1A-stimulated genes 1 [Source:MGI Symbol;Acc:MGI:1344382]
ENSMUSG00000079018	Ly6c1	41.0397	37.1961	29.9624	64.5515	37.6973	50.4421	15	75044018	75048830	-	1677	protein_coding	lymphocyte antigen 6 complex, locus C1 [Source:MGI Symbol;Acc:MGI:96882]
ENSMUSG00000017781	Pitpna	43.5033	44.7665	43.4669	39.4173	46.4392	43.2338	11	75588097	75628804	+	4129	protein_coding	phosphatidylinositol transfer protein, alpha [Source:MGI Symbol;Acc:MGI:99887]
ENSMUSG00000024726	Carnmt1	69.6028	63.8052	47.5829	22.1529	23.0246	34.5357	19	18670780	18704788	+	2090	protein_coding	carnosine N-methyltransferase 1 [Source:MGI Symbol;Acc:MGI:1914633]
ENSMUSG00000035296	Sgcg	68.3778	53.5103	58.1782	28.3165	19.4636	32.2467	14	61221059	61258490	-	1878	protein_coding	sarcoglycan, gamma (dystrophin-associated glycoprotein) [Source:MGI Symbol;Acc:MGI:1346524]
ENSMUSG00000029472	Anapc5	59.0393	47.5671	50.1981	37.4709	31.9145	33.7031	5	122787459	122821339	-	6111	protein_coding	anaphase-promoting complex subunit 5 [Source:MGI Symbol;Acc:MGI:1929722]
ENSMUSG00000020152	Actr2	32.4385	38.8598	33.7415	51.6615	56.8853	46.2441	11	20062304	20112913	-	5204	protein_coding	ARP2 actin-related protein 2 [Source:MGI Symbol;Acc:MGI:1913963]
ENSMUSG00000087260	Lamtor5	39.7978	45.3311	44.1091	43.3965	42.6485	44.4771	3	107278858	107284082	+	884	protein_coding	late endosomal/lysosomal adaptor, MAPK and MTOR activator 5 [Source:MGI Symbol;Acc:MGI:1915826]
ENSMUSG00000055027	Smyd1	72.0107	55.2431	57.938	23.5509	15.8827	34.6321	6	71213940	71322233	-	4546	protein_coding	SET and MYND domain containing 1 [Source:MGI Symbol;Acc:MGI:104790]
ENSMUSG00000005625	Psmd4	46.0662	42.3875	41.7296	43.6552	42.8067	42.0655	3	95032694	95042614	-	2808	protein_coding	proteasome (prosome, macropain) 26S subunit, non-ATPase, 4 [Source:MGI Symbol;Acc:MGI:1201670]
ENSMUSG00000002741	Ykt6	39.7821	44.4172	41.855	42.4546	48.1458	41.6781	11	5955693	5967780	+	2984	protein_coding	YKT6 v-SNARE homolog (S. cerevisiae) [Source:MGI Symbol;Acc:MGI:1927550]
ENSMUSG00000022816	Fstl1	52.16	40.9684	39.8776	51.5876	37.0337	36.268	16	37776873	37836514	+	4914	protein_coding	follistatin-like 1 [Source:MGI Symbol;Acc:MGI:102793]
ENSMUSG00000029465	Arpc3	33.7399	38.5455	36.9615	48.7247	48.7924	51.09	5	122391878	122414184	+	2762	protein_coding	actin related protein 2/3 complex, subunit 3 [Source:MGI Symbol;Acc:MGI:1928375]
ENSMUSG00000060743	H3f3a	39.356	45.7996	41.3569	43.2769	47.7797	40.2475	1	180800832	180813943	-	3504	protein_coding	H3 histone, family 3A [Source:MGI Symbol;Acc:MGI:1097686]
ENSMUSG00000031996	Aplp2	46.1237	44.5919	46.1031	39.2538	37.5189	44.1598	9	31149557	31211815	-	5875	protein_coding	amyloid beta (A4) precursor-like protein 2 [Source:MGI Symbol;Acc:MGI:88047]
ENSMUSG00000062694	Cav3	58.1544	50.8586	49.8849	37.7303	27.5504	32.8665	6	112459505	112472872	+	1157	protein_coding	caveolin 3 [Source:MGI Symbol;Acc:MGI:107570]
ENSMUSG00000031519	Asb5	68.4703	54.3191	53.0413	32.3235	20.9239	27.8873	8	54529580	54587842	+	1843	protein_coding	ankyrin repeat and SOCs box-containing 5 [Source:MGI Symbol;Acc:MGI:1923544]
ENSMUSG00000001729	Akt1	37.9074	33.1121	33.0655	44.4284	50.2142	58.1659	12	112653821	112674884	-	4098	protein_coding	thymoma viral proto-oncogene 1 [Source:MGI Symbol;Acc:MGI:87986]
ENSMUSG00000040269	Mrps28	45.8048	45.3835	48.0816	37.3934	40.9195	38.7777	3	8802146	8923918	-	783	protein_coding	mitochondrial ribosomal protein S28 [Source:MGI Symbol;Acc:MGI:1913480]
ENSMUSG00000034880	Mrpl34	43.7335	42.2545	42.087	33.7068	42.7815	51.7367	8	71464959	71465747	+	607	protein_coding	mitochondrial ribosomal protein L34 [Source:MGI Symbol;Acc:MGI:2137227]
ENSMUSG00000007655	Cav1	48.5564	47.18	46.878	47.3085	27.0994	39.2556	6	17306335	17341452	+	3444	protein_coding	caveolin 1, caveolae protein [Source:MGI Symbol;Acc:MGI:102709]
ENSMUSG00000037966	Ninj1	36.4307	37.2061	34.0028	47.6899	45.7277	55.1533	13	49187485	49196244	+	1570	protein_coding	ninjurin 1 [Source:MGI Symbol;Acc:MGI:1196617]
ENSMUSG00000019487	Trip10	58.3006	45.089	51.6467	33.3762	28.8718	38.9259	17	57249455	57263665	+	3180	protein_coding	thyroid hormone receptor interactor 10 [Source:MGI Symbol;Acc:MGI:2146901]
ENSMUSG00000037373	Ctbp1	46.9019	42.8539	44.7477	38.3318	39.9427	43.2413	5	33247723	33274994	-	4476	protein_coding	C-terminal binding protein 1 [Source:MGI Symbol;Acc:MGI:1201685]
ENSMUSG00000039103	Nexn	61.9314	47.2257	55.1093	33.4688	25.7769	32.4405	3	152236982	152266350	-	3826	protein_coding	nexilin [Source:MGI Symbol;Acc:MGI:1916060]
ENSMUSG00000073838	Tufm	43.7936	42.1434	43.0027	37.0397	46.3526	43.4729	7	126487361	126490731	+	2125	protein_coding	Tu translation elongation factor, mitochondrial [Source:MGI Symbol;Acc:MGI:1923686]
ENSMUSG00000022564	Grina	40.7276	42.5997	37.4741	40.5006	39.3038	54.5413	15	76246807	76249904	+	1693	protein_coding	glutamate receptor, ionotropic, N-methyl D-aspartate-associated protein 1 (glutamate binding) [Source:MGI Symbol;Acc:MGI:1913418]
ENSMUSG00000060992	Copz1	37.292	42.2966	38.9081	43.3551	46.3827	46.7909	15	103272911	103299862	+	1669	protein_coding	coatomer protein complex, subunit zeta 1 [Source:MGI Symbol;Acc:MGI:1929063]
ENSMUSG00000022037	Clu	46.6529	37.757	52.856	52.7163	20.2555	44.3646	14	65968483	65981547	+	3437	protein_coding	clusterin [Source:MGI Symbol;Acc:MGI:88423]
ENSMUSG00000096617	Gm5559	47.0564	39.4684	47.1647	63.4139	23.9513	33.2536	5	95861714	95862715	+	1002	processed_pseudogene	predicted gene 5559 [Source:MGI Symbol;Acc:MGI:3779498]
ENSMUSG00000074743	Thbd	31.7592	25.3887	31.1126	60.2855	54.699	51.0251	2	148404466	148408188	-	3723	protein_coding	thrombomodulin [Source:MGI Symbol;Acc:MGI:98736]
ENSMUSG00000074622	Mafb	15.2915	16.4889	14.7338	61.0877	85.6959	60.8838	2	160363703	160367065	-	3363	protein_coding	v-maf musculoaponeurotic fibrosarcoma oncogene family, protein B (avian) [Source:MGI Symbol;Acc:MGI:104555]
ENSMUSG00000035203	Epn1	43.4625	39.8587	42.7455	36.6568	48.5575	42.8211	7	5080235	5098178	+	2810	protein_coding	epsin 1 [Source:MGI Symbol;Acc:MGI:1333763]
ENSMUSG00000002332	Dhrs1	28.8546	37.1198	34.9133	43.312	64.9254	44.4419	14	55739020	55745690	-	2760	protein_coding	dehydrogenase/reductase (SDR family) member 1 [Source:MGI Symbol;Acc:MGI:1196314]
ENSMUSG00000005413	Hmox1	33.7879	53.7908	47.3245	39.3857	38.9156	40.1516	8	75093621	75100589	+	1751	protein_coding	heme oxygenase 1 [Source:MGI Symbol;Acc:MGI:96163]
ENSMUSG00000025203	Scd2	31.2395	31.3044	28.4656	26.8709	86.1186	48.975	19	44293676	44306864	+	5453	protein_coding	stearoyl-Coenzyme A desaturase 2 [Source:MGI Symbol;Acc:MGI:98240]
ENSMUSG00000100131	Gm28439	48.9937	34.7314	44.3983	64.6826	20.3716	39.7483	1	24611535	24612410	-	876	unprocessed_pseudogene	predicted gene 28439 [Source:MGI Symbol;Acc:MGI:5579145]
ENSMUSG00000097768	2310043M15Rik	33.3062	61.0794	52.8451	45.7701	28.5294	31.1639	16	93792150	93794888	-	1553	lincRNA	RIKEN cDNA 2310043M15 gene [Source:MGI Symbol;Acc:MGI:1919180]
ENSMUSG00000029762	Akr1b8	17.2245	19.8506	14.3184	52.0667	86.5368	62.5447	6	34354119	34368463	+	1499	protein_coding	aldo-keto reductase family 1, member B8 [Source:MGI Symbol;Acc:MGI:107673]
ENSMUSG00000052934	Fbxo31	52.526	42.9706	44.5573	42.4057	34.7756	35.2681	8	121549440	121578806	-	5482	protein_coding	F-box protein 31 [Source:MGI Symbol;Acc:MGI:1354708]
ENSMUSG00000027288	Zfp106	57.602	40.4211	48.6098	36.053	29.7582	39.9049	2	120506820	120563843	-	10429	protein_coding	zinc finger protein 106 [Source:MGI Symbol;Acc:MGI:1270153]
ENSMUSG00000081163	Defa-ps12	52.9361	88.8432	80.5038	15.993	6.37683	7.33733	8	19210462	19212767	+	193	unprocessed_pseudogene	defensin, alpha, pseudogene 12 [Source:MGI Symbol;Acc:MGI:3647175]
ENSMUSG00000054766	Set	36.2041	37.1303	36.0093	37.4211	55.6196	48.7522	2	30057378	30072577	+	4070	protein_coding	SET nuclear oncogene [Source:MGI Symbol;Acc:MGI:1860267]
ENSMUSG00000039952	Dag1	54.5692	44.2537	48.3574	35.3897	32.5961	35.7469	9	108204634	108263958	-	6357	protein_coding	dystroglycan 1 [Source:MGI Symbol;Acc:MGI:101864]
ENSMUSG00000074280	Gm6166	27.1745	38.3034	25.082	66.1962	52.7598	41.2428	9	57483963	57484371	+	409	processed_pseudogene	predicted gene 6166 [Source:MGI Symbol;Acc:MGI:3645893]
ENSMUSG00000018932	Map2k3	51.8027	50.6017	50.5952	32.4524	33.1512	31.822	11	60932033	60952811	+	3314	protein_coding	mitogen-activated protein kinase kinase 3 [Source:MGI Symbol;Acc:MGI:1346868]
ENSMUSG00000053768	Chchd3	54.0341	45.8224	44.8447	33.1357	30.0091	42.4674	6	32790976	33060260	-	2905	protein_coding	coiled-coil-helix-coiled-coil-helix domain containing 3 [Source:MGI Symbol;Acc:MGI:1913325]
ENSMUSG00000003200	Sh3gl1	37.4247	44.6736	47.7078	39.6258	40.5293	40.3234	17	56016753	56036637	-	2072	protein_coding	SH3-domain GRB2-like 1 [Source:MGI Symbol;Acc:MGI:700010]
ENSMUSG00000005873	Reep5	40.9898	42.7618	41.195	41.4437	47.2615	36.2964	18	34344889	34373415	-	2894	protein_coding	receptor accessory protein 5 [Source:MGI Symbol;Acc:MGI:1270152]
ENSMUSG00000053317	Sec61b	32.3213	34.2717	31.3055	49.4723	51.127	51.2516	4	47474658	47483242	+	1271	protein_coding	Sec61 beta subunit [Source:MGI Symbol;Acc:MGI:1913462]
ENSMUSG00000053436	Mapk14	45.2863	40.6764	44.4432	39.4033	40.8549	38.7372	17	28691342	28748404	+	4361	protein_coding	mitogen-activated protein kinase 14 [Source:MGI Symbol;Acc:MGI:1346865]
ENSMUSG00000031672	Got2	41.3297	37.0496	39.5892	34.2137	46.6881	50.4481	8	95864134	95888547	-	4824	protein_coding	glutamatic-oxaloacetic transaminase 2, mitochondrial [Source:MGI Symbol;Acc:MGI:95792]
ENSMUSG00000018648	Dusp14	35.3848	50.8812	48.8515	41.397	34.2537	38.5237	11	84048041	84069261	-	1945	protein_coding	dual specificity phosphatase 14 [Source:MGI Symbol;Acc:MGI:1927168]
ENSMUSG00000030554	Synm	65.5088	49.8758	57.3066	26.0245	19.5994	30.9449	7	67730160	67759742	-	7933	protein_coding	synemin, intermediate filament protein [Source:MGI Symbol;Acc:MGI:2661187]
ENSMUSG00000020844	Nxn	46.9972	47.1137	49.2761	32.9316	31.3983	41.483	11	76257198	76399140	-	3239	protein_coding	nucleoredoxin [Source:MGI Symbol;Acc:MGI:109331]
ENSMUSG00000110841	AC153368.1	47.8493	41.8822	43.6052	47.197	28.5005	40.1327	10	45875291	45876086	+	796	transcribed_processed_pseudogene
ENSMUSG00000034220	Gpc1	55.4334	44.3185	53.1483	28.5134	29.6052	38.0494	1	92831645	92860779	+	5159	protein_coding	glypican 1 [Source:MGI Symbol;Acc:MGI:1194891]
ENSMUSG00000052911	Lamb2	49.4317	46.6238	45.3937	37.1131	30.9739	39.4861	9	108479736	108490530	+	6082	protein_coding	laminin, beta 2 [Source:MGI Symbol;Acc:MGI:99916]
ENSMUSG00000026176	Ctdsp1	50.2995	45.1982	46.3036	35.0087	35.5117	36.4782	1	74391509	74397285	+	3334	protein_coding	CTD (carboxy-terminal domain, RNA polymerase II, polypeptide A) small phosphatase 1 [Source:MGI Symbol;Acc:MGI:2654470]
ENSMUSG00000045817	Zfp36l2	30.771	32.419	32.6161	49.9284	50.8794	51.927	17	84183931	84187947	-	3530	protein_coding	zinc finger protein 36, C3H type-like 2 [Source:MGI Symbol;Acc:MGI:107945]
ENSMUSG00000035493	Tgfbi	33.1801	35.6667	35.9856	44.0013	55.4388	44.0358	13	56609523	56639562	+	3771	protein_coding	transforming growth factor, beta induced [Source:MGI Symbol;Acc:MGI:99959]
ENSMUSG00000020720	Psmd12	44.2644	44.8055	39.1209	40.9821	42.0309	36.9647	11	107479484	107504362	+	2649	protein_coding	proteasome (prosome, macropain) 26S subunit, non-ATPase, 12 [Source:MGI Symbol;Acc:MGI:1914247]
ENSMUSG00000041577	Prelp	40.2997	35.3561	39.5635	45.2293	41.115	46.2818	1	133910304	133921414	-	3615	protein_coding	proline arginine-rich end leucine-rich repeat [Source:MGI Symbol;Acc:MGI:2151110]
ENSMUSG00000050608	Minos1	47.3839	46.1221	42.1652	37.6225	34.5725	39.9185	4	139101814	139131113	-	2766	protein_coding	mitochondrial inner membrane organizing system 1 [Source:MGI Symbol;Acc:MGI:1913628]
ENSMUSG00000106755	Tpi-rs11	49.3665	44.527	45.9434	27.7371	35.3338	44.606	6	127183409	127183718	-	310	processed_pseudogene	triosephosphate isomerase related sequence 11 [Source:MGI Symbol;Acc:MGI:98799]
ENSMUSG00000044086	Lmod3	60.5606	60.7651	63.2434	28.368	12.8166	21.3422	6	97238534	97252759	-	2215	protein_coding	leiomodin 3 (fetal) [Source:MGI Symbol;Acc:MGI:2444169]
ENSMUSG00000004264	Phb2	35.4926	37.19	36.8468	40.442	50.7672	46.1311	6	124712336	124716950	+	3718	protein_coding	prohibitin 2 [Source:MGI Symbol;Acc:MGI:102520]
ENSMUSG00000068887	Lce1j	34.4777	68.7562	48.8779	43.4676	17.4484	33.5926	3	92788840	92790514	-	703	protein_coding	late cornified envelope 1J [Source:MGI Symbol;Acc:MGI:3702532]
ENSMUSG00000028792	Ak2	29.324	36.4468	31.8573	44.8161	54.7693	48.9876	4	128991958	129011529	+	2140	protein_coding	adenylate kinase 2 [Source:MGI Symbol;Acc:MGI:87978]
ENSMUSG00000017831	Rab5a	35.2935	52.403	43.3125	39.4927	41.2331	34.4581	17	53479234	53507671	+	2357	protein_coding	RAB5A, member RAS oncogene family [Source:MGI Symbol;Acc:MGI:105926]
ENSMUSG00000070934	Rraga	40.449	41.1796	38.5341	40.661	46.7291	38.6126	4	86575668	86577285	+	1618	protein_coding	Ras-related GTP binding A [Source:MGI Symbol;Acc:MGI:1915691]
ENSMUSG00000027002	Nckap1	37.4945	43.3461	40.2484	43.2865	45.2639	36.0369	2	80500512	80581380	-	4964	protein_coding	NCK-associated protein 1 [Source:MGI Symbol;Acc:MGI:1355333]
ENSMUSG00000037573	Tob1	48.4833	45.4662	45.2281	36.0198	34.8563	35.5337	11	94211454	94215495	+	2288	protein_coding	transducer of ErbB-2.1 [Source:MGI Symbol;Acc:MGI:1349721]
ENSMUSG00000018765	Fxr2	43.1108	43.0319	46.1492	33.077	39.9676	39.5267	11	69632990	69653297	+	3766	protein_coding	fragile X mental retardation, autosomal homolog 2 [Source:MGI Symbol;Acc:MGI:1346074]
ENSMUSG00000030592	Ryr1	60.4334	40.3131	45.2632	32.9591	25.1503	40.5726	7	29003344	29125179	-	21838	protein_coding	ryanodine receptor 1, skeletal muscle [Source:MGI Symbol;Acc:MGI:99659]
ENSMUSG00000015846	Rxra	37.6995	36.6919	37.9189	38.3469	53.4097	40.4224	2	27676440	27762957	+	5462	protein_coding	retinoid X receptor alpha [Source:MGI Symbol;Acc:MGI:98214]
ENSMUSG00000026985	Il1f8	25.6766	50.3527	34.4541	47.8268	50.1932	35.8321	2	24153161	24160519	+	1217	protein_coding	interleukin 1 family, member 8 [Source:MGI Symbol;Acc:MGI:1916927]
ENSMUSG00000048373	Fgfbp1	22.101	33.2206	25.9447	43.335	64.446	55.2145	5	43978858	43981779	-	2263	protein_coding	fibroblast growth factor binding protein 1 [Source:MGI Symbol;Acc:MGI:1096350]
ENSMUSG00000018862	Otop3	33.4791	38.3321	40.1921	49.5295	47.6531	34.8	11	115334731	115346927	+	2426	protein_coding	otopetrin 3 [Source:MGI Symbol;Acc:MGI:1916852]
ENSMUSG00000055053	Nfic	57.0032	44.7512	48.0788	28.0332	28.8284	37.1647	10	81396186	81455635	-	6630	protein_coding	nuclear factor I/C [Source:MGI Symbol;Acc:MGI:109591]
ENSMUSG00000029447	Cct6a	41.0116	39.7273	40.6094	36.1286	44.3787	41.9493	5	129786998	129846371	+	3620	processed_transcript	chaperonin containing Tcp1, subunit 6a (zeta) [Source:MGI Symbol;Acc:MGI:107943]
ENSMUSG00000038014	Fam120a	37.9578	35.4219	36.4151	40.8471	47.871	44.4894	13	48879219	48968017	-	5105	protein_coding	family with sequence similarity 120, member A [Source:MGI Symbol;Acc:MGI:2446163]
ENSMUSG00000025103	Btbd1	52.3291	43.2353	46.9724	35.2911	30.6825	34.3305	7	81792074	81829431	-	3471	protein_coding	BTB (POZ) domain containing 1 [Source:MGI Symbol;Acc:MGI:1933765]
ENSMUSG00000021123	Rdh12	39.6067	51.3684	47.5665	34.1226	41.0243	29.0723	12	79208914	79222665	+	2967	protein_coding	retinol dehydrogenase 12 [Source:MGI Symbol;Acc:MGI:1925224]
ENSMUSG00000008348	Ubc	52.5441	40.4322	47.4406	30.3009	32.3032	39.6346	5	125385965	125390202	-	2893	protein_coding	ubiquitin C [Source:MGI Symbol;Acc:MGI:98889]
ENSMUSG00000029050	Ski	41.8406	37.8012	40.7111	37.0074	41.8282	42.9306	4	155154075	155222592	-	5562	protein_coding	ski sarcoma viral oncogene homolog (avian) [Source:MGI Symbol;Acc:MGI:98310]
ENSMUSG00000038375	Trp53inp2	58.0104	42.8291	49.2683	29.5755	24.5272	37.4431	2	155381059	155389850	+	5257	protein_coding	transformation related protein 53 inducible nuclear protein 2 [Source:MGI Symbol;Acc:MGI:1915978]
ENSMUSG00000022270	Retreg1	53.4536	47.7482	50.9448	33.2227	28.126	28.1319	15	25843264	25973687	+	3346	protein_coding	reticulophagy regulator 1 [Source:MGI Symbol;Acc:MGI:1913520]
ENSMUSG00000024782	Ak3	34.2254	41.5779	37.8918	42.1021	47.6381	38.0591	19	29020833	29047961	-	3120	protein_coding	adenylate kinase 3 [Source:MGI Symbol;Acc:MGI:1860835]
ENSMUSG00000078377	Gm4294	23.8801	34.8495	32.9289	71.3131	40.2225	38.0549	12	12023045	12023658	+	614	processed_pseudogene	predicted gene 4294 [Source:MGI Symbol;Acc:MGI:3782472]
ENSMUSG00000040078	Ptges3-ps	41.7679	36.9164	43.4702	35.0922	45.8959	37.7454	6	85843980	85844459	+	480	processed_pseudogene	prostaglandin E synthase 3, pseudogene [Source:MGI Symbol;Acc:MGI:3704271]
ENSMUSG00000073616	Cops9	43.5745	46.5198	43.3871	37.3586	30.2414	39.7052	1	92637145	92641985	-	1499	protein_coding	COP9 signalosome subunit 9 [Source:MGI Symbol;Acc:MGI:1914165]
ENSMUSG00000026701	Prdx6	38.7344	47.673	45.8804	38.9823	36.2335	33.2317	1	161240112	161251219	-	4804	protein_coding	peroxiredoxin 6 [Source:MGI Symbol;Acc:MGI:894320]
ENSMUSG00000019428	Fkbp8	36.2726	41.2029	38.4074	39.1976	42.7725	42.7721	8	70527724	70535328	+	4529	protein_coding	FK506 binding protein 8 [Source:MGI Symbol;Acc:MGI:1341070]
ENSMUSG00000072941	Sod3	35.7602	29.4011	31.1742	45.8879	49.892	48.5027	5	52363791	52371418	+	3738	protein_coding	superoxide dismutase 3, extracellular [Source:MGI Symbol;Acc:MGI:103181]
ENSMUSG00000048416	Mlf1	67.2671	53.9863	49.8857	23.8559	15.584	29.9716	3	67374097	67400003	+	1719	protein_coding	myeloid leukemia factor 1 [Source:MGI Symbol;Acc:MGI:1341819]
ENSMUSG00000021453	Gadd45g	55.1746	39.4153	49.2894	36.4638	26.4052	33.732	13	51846678	51848468	+	1173	protein_coding	growth arrest and DNA-damage-inducible 45 gamma [Source:MGI Symbol;Acc:MGI:1346325]
ENSMUSG00000054619	Mettl7a1	41.34	36.9062	40.9128	40.793	41.0243	39.3055	15	100304817	100314348	+	1883	protein_coding	methyltransferase like 7A1 [Source:MGI Symbol;Acc:MGI:1916523]
ENSMUSG00000018566	Slc2a4	54.5959	45.991	52.5622	27.5751	27.1411	32.2615	11	69942539	69948188	-	3478	protein_coding	solute carrier family 2 (facilitated glucose transporter), member 4 [Source:MGI Symbol;Acc:MGI:95758]
ENSMUSG00000044477	Zfand3	48.0419	44.6952	46.0677	31.8575	30.5957	38.7206	17	30005087	30210019	+	2616	protein_coding	zinc finger, AN1-type domain 3 [Source:MGI Symbol;Acc:MGI:1096572]
ENSMUSG00000040731	Eif4h	37.9499	38.0224	39.177	37.0489	46.4045	41.365	5	134619721	134639490	-	5551	protein_coding	eukaryotic translation initiation factor 4H [Source:MGI Symbol;Acc:MGI:1341822]
ENSMUSG00000026341	Actr3	31.8737	35.8296	32.1418	45.6088	50.317	43.9975	1	125392905	125435727	-	4631	protein_coding	ARP3 actin-related protein 3 [Source:MGI Symbol;Acc:MGI:1921367]
ENSMUSG00000071052	Rpl7a-ps5	40.2049	48.5911	36.0378	32.9482	41.2784	40.6695	17	57838427	57839233	-	807	protein_coding	ribosomal protein L7A, pseudogene 5 [Source:MGI Symbol;Acc:MGI:3643553]
ENSMUSG00000031353	Rbbp7	41.4985	40.2919	40.0239	37.6982	42.4204	37.498	X	162760402	162779092	+	2909	protein_coding	retinoblastoma binding protein 7, chromatin remodeling factor [Source:MGI Symbol;Acc:MGI:1194910]
ENSMUSG00000020349	Ppp2ca	40.0137	42.3358	41.6143	39.2203	38.2473	37.9856	11	52098681	52127778	+	7490	protein_coding	protein phosphatase 2 (formerly 2A), catalytic subunit, alpha isoform [Source:MGI Symbol;Acc:MGI:1321159]
ENSMUSG00000034607	Pof1b	29.9761	61.5037	41.405	41.2014	34.4262	30.3427	X	112638431	112698651	-	3886	protein_coding	premature ovarian failure 1B [Source:MGI Symbol;Acc:MGI:1916943]
ENSMUSG00000042312	S100a13	41.0137	43.0864	36.287	40.2096	34.3112	43.7472	3	90514435	90524581	+	715	protein_coding	S100 calcium binding protein A13 [Source:MGI Symbol;Acc:MGI:109581]
ENSMUSG00000022817	Itgb5	38.0939	38.4714	38.2156	35.7008	44.4165	43.6819	16	33829665	33949153	+	3362	protein_coding	integrin beta 5 [Source:MGI Symbol;Acc:MGI:96614]
ENSMUSG00000019494	Cops6	37.8887	41.1798	37.2357	39.6417	41.9828	40.6109	5	138161071	138164646	+	2525	protein_coding	COP9 signalosome subunit 6 [Source:MGI Symbol;Acc:MGI:1349439]
ENSMUSG00000022867	Usp25	43.668	52.0494	48.6362	36.5392	27.8764	29.595	16	77014069	77116779	+	4412	protein_coding	ubiquitin specific peptidase 25 [Source:MGI Symbol;Acc:MGI:1353655]
ENSMUSG00000027456	Sdcbp2	23.5279	46.3969	34.0654	39.5246	46.2439	48.5571	2	151572622	151590005	+	1399	protein_coding	syndecan binding protein (syntenin) 2 [Source:MGI Symbol;Acc:MGI:2385156]
ENSMUSG00000039070	Cpa4	26.329	50.3084	39.7263	43.9661	33.9997	43.8703	6	30568369	30592418	+	2739	protein_coding	carboxypeptidase A4 [Source:MGI Symbol;Acc:MGI:1919041]
ENSMUSG00000020736	Nt5c	31.6107	38.7547	29.9667	47.4987	52	38.362	11	115490420	115491862	-	1140	protein_coding	5',3'-nucleotidase, cytosolic [Source:MGI Symbol;Acc:MGI:1354954]
ENSMUSG00000029781	Fkbp9	45.9723	43.6261	43.0969	38.2404	31.5543	35.6804	6	56832059	56879358	+	3314	protein_coding	FK506 binding protein 9 [Source:MGI Symbol;Acc:MGI:1350921]
ENSMUSG00000020241	Col6a2	47.6302	44.9286	48.4531	34.3237	29.0264	33.5062	10	76595762	76623630	-	8326	protein_coding	collagen, type VI, alpha 2 [Source:MGI Symbol;Acc:MGI:88460]
ENSMUSG00000074637	Sox2	32.0658	37.7317	39.6793	41.3296	54.1672	32.822	3	34650405	34652461	+	2057	protein_coding	SRY (sex determining region Y)-box 2 [Source:MGI Symbol;Acc:MGI:98364]
ENSMUSG00000027555	Car13	33.748	48.552	41.9358	40.6617	37.9015	34.7839	3	14641727	14663002	+	2299	protein_coding	carbonic anhydrase 13 [Source:MGI Symbol;Acc:MGI:1931322]
ENSMUSG00000028517	Plpp3	44.7097	44.8747	44.5967	39.67	28.2066	35.427	4	105157347	105232764	+	3159	protein_coding	phospholipid phosphatase 3 [Source:MGI Symbol;Acc:MGI:1915166]
ENSMUSG00000004096	Cwc15	39.7272	40.9523	41.145	39.8847	37.4989	38.2566	9	14500617	14510577	+	1571	protein_coding	CWC15 spliceosome-associated protein [Source:MGI Symbol;Acc:MGI:1913320]
ENSMUSG00000030127	Cops7a	35.8568	39.0944	39.9713	36.5804	44.2172	41.727	6	124958413	124965538	-	2711	protein_coding	COP9 signalosome subunit 7A [Source:MGI Symbol;Acc:MGI:1349400]
ENSMUSG00000063576	Klhdc3	47.5531	37.9898	38.0635	35.4045	41.0629	37.2618	17	46674550	46680930	-	2126	protein_coding	kelch domain containing 3 [Source:MGI Symbol;Acc:MGI:2651568]
ENSMUSG00000069939	Gm12070	38.3533	34.7017	43.487	67.5065	21.7404	31.3	11	26786633	26787634	+	1002	processed_pseudogene	predicted gene 12070 [Source:MGI Symbol;Acc:MGI:3650751]
ENSMUSG00000073940	Hbb-bt	16.2355	31.7284	18.9845	95.2148	31.3955	43.3683	7	103812524	103813996	-	703	protein_coding	hemoglobin, beta adult t chain [Source:MGI Symbol;Acc:MGI:5474850]
ENSMUSG00000006095	Tbcb	38.123	41.9661	40.1291	39.4163	37.2405	39.6861	7	30224131	30232272	-	1442	protein_coding	tubulin folding cofactor B [Source:MGI Symbol;Acc:MGI:1913661]
ENSMUSG00000085839	Gm15949	64.4606	40.9393	47.8227	33.5961	15.9539	33.7168	5	66985091	66985641	-	126	antisense_RNA	predicted gene 15949 [Source:MGI Symbol;Acc:MGI:3801730]
ENSMUSG00000022223	Sdr39u1	44.5955	41.1007	44.234	35.0673	37.2431	34.2442	14	55897286	55900232	-	1226	protein_coding	short chain dehydrogenase/reductase family 39U, member 1 [Source:MGI Symbol;Acc:MGI:1916876]
ENSMUSG00000053716	Dusp7	18.9027	25.3329	24.5878	42.3211	77.3667	47.9051	9	106368632	106375724	+	3356	protein_coding	dual specificity phosphatase 7 [Source:MGI Symbol;Acc:MGI:2387100]
ENSMUSG00000045667	Smtnl2	69.2812	50.8298	53.0752	18.1581	15.9366	29.0841	11	72389164	72411713	-	3815	protein_coding	smoothelin-like 2 [Source:MGI Symbol;Acc:MGI:2442764]
ENSMUSG00000059208	Hnrnpm	35.6184	35.2758	38.3581	39.2173	45.824	42.04	17	33646233	33686860	-	4701	protein_coding	heterogeneous nuclear ribonucleoprotein M [Source:MGI Symbol;Acc:MGI:1926465]
ENSMUSG00000044748	Defb1	27.1584	40.0394	30.439	49.6067	42.0122	46.9042	8	21776599	21795185	+	872	protein_coding	defensin beta 1 [Source:MGI Symbol;Acc:MGI:1096878]
ENSMUSG00000055148	Klf2	37.0309	33.4363	34.026	46.3629	34.4275	50.8506	8	72319033	72321656	+	1847	protein_coding	Kruppel-like factor 2 (lung) [Source:MGI Symbol;Acc:MGI:1342772]
ENSMUSG00000026966	Ssna1	36.2818	39.4901	36.9588	39.015	41.7637	42.3682	2	25271039	25272438	-	1276	protein_coding	SS nuclear autoantigen 1 [Source:MGI Symbol;Acc:MGI:1915725]
ENSMUSG00000042254	Cilp	57.3754	28.644	39.5744	39.1482	31.9067	39.2209	9	65265180	65280605	+	4252	protein_coding	cartilage intermediate layer protein, nucleotide pyrophosphohydrolase [Source:MGI Symbol;Acc:MGI:2444507]
ENSMUSG00000002658	Gtf2f1	32.8636	33.9094	32.7738	42.631	51.0354	42.3293	17	57003405	57011288	-	1717	protein_coding	general transcription factor IIF, polypeptide 1 [Source:MGI Symbol;Acc:MGI:1923848]
ENSMUSG00000005510	Ndufs3	49.087	45.3064	44.6086	30.9757	29.1389	36.4104	2	90894634	90904827	-	2178	protein_coding	NADH dehydrogenase (ubiquinone) Fe-S protein 3 [Source:MGI Symbol;Acc:MGI:1915599]
ENSMUSG00000037139	Myom3	58.2097	42.6603	52.2483	30.5991	20.3627	31.3514	4	135759715	135815564	+	6038	protein_coding	myomesin family, member 3 [Source:MGI Symbol;Acc:MGI:2685280]
ENSMUSG00000018102	Hist1h2bc	43.1173	36.5243	41.3985	34.8258	34.8493	44.4965	13	23684199	23692908	+	1156	protein_coding	histone cluster 1, H2bc [Source:MGI Symbol;Acc:MGI:1915274]
ENSMUSG00000002010	Idh3g	48.6667	41.6618	44.2124	32.9446	30.7568	36.7157	X	73778963	73786897	-	2701	protein_coding	isocitrate dehydrogenase 3 (NAD+), gamma [Source:MGI Symbol;Acc:MGI:1099463]
ENSMUSG00000022013	Dnajc15	44.7266	42.1607	36.9649	36.8138	37.0358	37.0223	14	77826217	77874917	-	648	protein_coding	DnaJ heat shock protein family (Hsp40) member C15 [Source:MGI Symbol;Acc:MGI:1913398]
ENSMUSG00000040659	Efhd2	30.3595	29.7688	33.0458	39.2057	50.1044	51.9358	4	141858142	141874920	-	2381	protein_coding	EF hand domain containing 2 [Source:MGI Symbol;Acc:MGI:106504]
ENSMUSG00000024197	Plin3	47.2817	42.0106	48.6455	34.1894	28.5403	33.4706	17	56278962	56290511	-	2159	protein_coding	perilipin 3 [Source:MGI Symbol;Acc:MGI:1914155]
ENSMUSG00000062373	Tmem65	47.2425	41.7077	44.1903	36.1397	35.2325	29.5675	15	58782269	58823530	-	3747	protein_coding	transmembrane protein 65 [Source:MGI Symbol;Acc:MGI:1922118]
ENSMUSG00000021814	Anxa7	39.7864	41.0418	39.6329	40.7092	37.2444	35.5809	14	20455260	20480133	-	5991	protein_coding	annexin A7 [Source:MGI Symbol;Acc:MGI:88031]
ENSMUSG00000046259	Sprr2h	0	0.444598	0.463553	34.8303	117.781	80.4756	3	92385685	92387324	+	752	protein_coding	small proline-rich protein 2H [Source:MGI Symbol;Acc:MGI:1330343]
ENSMUSG00000024576	Csnk1a1	34.8591	35.4876	33.7714	43.3559	49.0635	37.4502	18	61555274	61590061	+	10502	protein_coding	casein kinase 1, alpha 1 [Source:MGI Symbol;Acc:MGI:1934950]
ENSMUSG00000005732	Ranbp1	28.9431	30.6471	28.0978	41.1305	60.0836	45.0751	16	18239784	18248732	-	1666	protein_coding	RAN binding protein 1 [Source:MGI Symbol;Acc:MGI:96269]
ENSMUSG00000064080	Fbln2	47.029	35.2708	40.011	39.5885	30.9646	41.1074	6	91212455	91272540	+	6370	protein_coding	fibulin 2 [Source:MGI Symbol;Acc:MGI:95488]
ENSMUSG00000047260	Emc6	46.2519	41.8217	39.2408	32.1908	34.327	40.0018	11	73175519	73177037	-	1415	protein_coding	ER membrane protein complex subunit 6 [Source:MGI Symbol;Acc:MGI:1913298]
ENSMUSG00000073602	Serpinb3b	21.8549	22.0986	26.9055	51.8272	51.9365	59.1689	1	107153940	107278361	-	1688	protein_coding	serine (or cysteine) peptidase inhibitor, clade B (ovalbumin), member 3B [Source:MGI Symbol;Acc:MGI:2683293]
ENSMUSG00000024955	Esrra	36.6528	37.0963	38.7172	33.7615	43.6256	43.7499	19	6910977	6921813	-	2539	protein_coding	estrogen related receptor, alpha [Source:MGI Symbol;Acc:MGI:1346831]
ENSMUSG00000046818	Ddit4l	79.0302	59.9324	53.2315	13.6247	8.79292	18.5255	3	137621612	137628333	+	2916	protein_coding	DNA-damage-inducible transcript 4-like [Source:MGI Symbol;Acc:MGI:1920534]
ENSMUSG00000078566	Bnip3	49.0134	42.7437	42.1036	33.4654	31.4429	33.6695	7	138890836	138909519	-	2265	protein_coding	BCL2/adenovirus E1B interacting protein 3 [Source:MGI Symbol;Acc:MGI:109326]
ENSMUSG00000032199	Polr2m	47.3856	39.0336	39.7939	34.9994	35.3377	35.7394	9	71478437	71485935	-	2424	protein_coding	polymerase (RNA) II (DNA directed) polypeptide M [Source:MGI Symbol;Acc:MGI:107282]
ENSMUSG00000050628	Ubald2	30.8608	41.1531	42.225	35.8343	38.3732	43.5804	11	116434094	116439077	+	1532	protein_coding	UBA-like domain containing 2 [Source:MGI Symbol;Acc:MGI:1914635]
ENSMUSG00000025871	4833439L19Rik	48.7834	42.3973	46.955	30.0376	30.3659	33.3645	13	54551218	54565435	-	3187	protein_coding	RIKEN cDNA 4833439L19 gene [Source:MGI Symbol;Acc:MGI:1921162]
ENSMUSG00000076432	Ywhaq	33.6701	41.2246	36.6374	39.6148	41.815	38.888	12	21390071	21417637	-	3061	protein_coding	tyrosine 3-monooxygenase/tryptophan 5-monooxygenase activation protein theta [Source:MGI Symbol;Acc:MGI:891963]
ENSMUSG00000064366	mt-Tl2	52.9829	51.126	31.5626	33.5369	23.1123	39.3037	MT	11671	11741	+	71	Mt_tRNA	mitochondrially encoded tRNA leucine 2 [Source:MGI Symbol;Acc:MGI:102481]
ENSMUSG00000007739	Cct4	42.3609	41.2933	41.335	35.383	35.1943	35.7908	11	22990519	23003780	+	4201	protein_coding	chaperonin containing Tcp1, subunit 4 (delta) [Source:MGI Symbol;Acc:MGI:104689]
ENSMUSG00000018736	Ndel1	34.771	41.3168	39.0675	41.533	38.5399	35.7989	11	68821434	68871858	-	3253	protein_coding	nudE neurodevelopment protein 1 like 1 [Source:MGI Symbol;Acc:MGI:1932915]
ENSMUSG00000018042	Cyb5r3	34.2239	37.0054	38.0153	43.3562	37.8553	40.4194	15	83153494	83172592	-	4298	protein_coding	cytochrome b5 reductase 3 [Source:MGI Symbol;Acc:MGI:94893]
ENSMUSG00000004665	Cnn2	34.7715	37.6858	40.4464	36.6203	34.0368	47.2881	10	79988584	79996062	+	2460	protein_coding	calponin 2 [Source:MGI Symbol;Acc:MGI:105093]
ENSMUSG00000024360	Etf1	37.4228	38.7096	37.7016	36.8428	42.3073	37.8546	18	34902785	34932007	-	3709	protein_coding	eukaryotic translation termination factor 1 [Source:MGI Symbol;Acc:MGI:2385071]
ENSMUSG00000006411	Nectin4	32.5456	43.8227	42.1814	36.9498	42.0427	33.1222	1	171370099	171388598	+	3746	protein_coding	nectin cell adhesion molecule 4 [Source:MGI Symbol;Acc:MGI:1918990]
ENSMUSG00000036850	Mrpl41	40.148	39.4794	37.6856	32.7236	35.388	44.8396	2	24974117	24975098	-	888	protein_coding	mitochondrial ribosomal protein L41 [Source:MGI Symbol;Acc:MGI:1333816]
ENSMUSG00000031548	Sfrp1	26.4777	26.5032	27.6331	57.4787	48.5404	43.6126	8	23411502	23449632	+	4372	protein_coding	secreted frizzled-related protein 1 [Source:MGI Symbol;Acc:MGI:892014]
ENSMUSG00000033589	Reep4	28.1908	39.1435	38.9315	37.4595	49.9768	36.4314	14	70545251	70548933	+	1668	protein_coding	receptor accessory protein 4 [Source:MGI Symbol;Acc:MGI:1919799]
ENSMUSG00000041740	Rnf10	42.4137	39.3743	39.6822	32.0499	37.9892	38.42	5	115241412	115272898	-	7556	protein_coding	ring finger protein 10 [Source:MGI Symbol;Acc:MGI:1859162]
ENSMUSG00000026576	Atp1b1	52.8066	54.661	50.9787	23.7005	18.7612	28.686	1	164437109	164458355	-	3081	protein_coding	ATPase, Na+/K+ transporting, beta 1 polypeptide [Source:MGI Symbol;Acc:MGI:88108]
ENSMUSG00000038967	Pdk2	51.316	41.526	48.0512	28.8994	21.206	38.3977	11	95026258	95041354	-	3163	protein_coding	pyruvate dehydrogenase kinase, isoenzyme 2 [Source:MGI Symbol;Acc:MGI:1343087]
ENSMUSG00000018217	Pmp22	51.1372	41.4523	40.8926	38.7563	22.4292	34.679	11	63128982	63159547	+	2354	protein_coding	peripheral myelin protein 22 [Source:MGI Symbol;Acc:MGI:97631]
ENSMUSG00000031490	Eif4ebp1	32.158	35.4521	32.7683	37.308	47.6188	44.0209	8	27260329	27276674	+	2196	protein_coding	eukaryotic translation initiation factor 4E binding protein 1 [Source:MGI Symbol;Acc:MGI:103267]
ENSMUSG00000038086	Hspb2	61.0459	46.8462	49.3808	21.6245	19.43	30.913	9	50751078	50752354	-	834	protein_coding	heat shock protein 2 [Source:MGI Symbol;Acc:MGI:1916503]
ENSMUSG00000038845	Phb	40.7968	41.7517	38.6851	31.0786	36.1979	40.388	11	95666957	95680773	+	2805	protein_coding	prohibitin [Source:MGI Symbol;Acc:MGI:97572]
ENSMUSG00000004929	Thop1	38.2691	49.1314	47.1115	33.2433	33.5152	27.5884	10	81070035	81082559	+	5059	protein_coding	thimet oligopeptidase 1 [Source:MGI Symbol;Acc:MGI:1354165]
ENSMUSG00000039208	Metrnl	32.6132	39.5411	35.5437	43.1774	39.3429	38.4463	11	121701544	121716306	+	1586	protein_coding	meteorin, glial cell differentiation regulator-like [Source:MGI Symbol;Acc:MGI:2384806]
ENSMUSG00000053119	Chmp3	38.9331	42.3837	41.3713	36.3613	34.8012	34.5632	6	71543797	71582609	+	3250	protein_coding	charged multivesicular body protein 3 [Source:MGI Symbol;Acc:MGI:1913950]
ENSMUSG00000010277	2610507B11Rik	43.1071	41.1882	40.8896	36.3615	33.6382	33.2235	11	78261752	78290623	+	8798	protein_coding	RIKEN cDNA 2610507B11 gene [Source:MGI Symbol;Acc:MGI:1919753]
ENSMUSG00000071072	Ptges3	41.3785	33.5221	39.5785	33.2352	40.2841	40.3539	10	128058954	128077272	+	2217	protein_coding	prostaglandin E synthase 3 [Source:MGI Symbol;Acc:MGI:1929282]
ENSMUSG00000030662	Ipo5	39.4048	39.0235	39.2989	34.4422	38.9512	37.1867	14	120911194	120948042	+	4591	protein_coding	importin 5 [Source:MGI Symbol;Acc:MGI:1917822]
ENSMUSG00000009630	Ppp2cb	42.2528	41.8775	41.9002	34.4895	34.3219	33.4279	8	33599625	33619441	+	1469	protein_coding	protein phosphatase 2 (formerly 2A), catalytic subunit, beta isoform [Source:MGI Symbol;Acc:MGI:1321161]
ENSMUSG00000020444	Guk1	40.4878	46.6433	42.0915	35.2759	30.1143	33.5925	11	59183875	59192212	-	1835	protein_coding	guanylate kinase 1 [Source:MGI Symbol;Acc:MGI:95871]
ENSMUSG00000102869	2900097C17Rik	44.5653	38.8902	40.8219	35.9398	34.7392	33.1167	2	156388065	156392979	-	4915	lincRNA	RIKEN cDNA 2900097C17 gene [Source:MGI Symbol;Acc:MGI:1914767]
ENSMUSG00000028961	Pgd	25.9787	40.4133	33.3228	39.4713	51.9628	36.7984	4	149149991	149166771	-	6447	protein_coding	phosphogluconate dehydrogenase [Source:MGI Symbol;Acc:MGI:97553]
ENSMUSG00000016257	Prelid3b	39.1393	42.8835	40.1336	34.8729	33.437	37.3956	2	174465067	174473081	-	1860	protein_coding	PRELI domain containing 3B [Source:MGI Symbol;Acc:MGI:1913640]
ENSMUSG00000020917	Acly	33.751	38.8958	37.9882	35.458	42.0578	39.654	11	100476353	100528000	-	5279	protein_coding	ATP citrate lyase [Source:MGI Symbol;Acc:MGI:103251]
ENSMUSG00000001911	Nfix	44.0967	41.7264	41.5611	30.5623	34.1655	35.6613	8	84699876	84800344	-	7351	protein_coding	nuclear factor I/X [Source:MGI Symbol;Acc:MGI:97311]
ENSMUSG00000008140	Emc10	35.8012	37.0867	37.6265	35.2819	40.9117	40.9505	7	44489937	44496529	-	2917	protein_coding	ER membrane protein complex subunit 10 [Source:MGI Symbol;Acc:MGI:1916933]
ENSMUSG00000037049	Smpd1	37.9821	44.8856	47.0679	31.4359	36.0207	30.0051	7	105554360	105558389	+	3337	protein_coding	sphingomyelin phosphodiesterase 1, acid lysosomal [Source:MGI Symbol;Acc:MGI:98325]
ENSMUSG00000000628	Hk2	46.2782	37.1762	39.8124	29.0691	36.172	38.4055	6	82725025	82774454	-	5969	protein_coding	hexokinase 2 [Source:MGI Symbol;Acc:MGI:1315197]
ENSMUSG00000022565	Plec	39.5284	34.9471	38.3478	35.3674	34.5217	44.0623	15	76170974	76232574	-	18113	protein_coding	plectin [Source:MGI Symbol;Acc:MGI:1277961]
ENSMUSG00000034926	Dhcr24	35.9555	35.9167	40.8108	31.3744	46.962	35.5701	4	106561038	106589113	+	4028	protein_coding	24-dehydrocholesterol reductase [Source:MGI Symbol;Acc:MGI:1922004]
ENSMUSG00000022365	Derl1	37.3514	36.7217	37.5906	38.3184	37.1892	39.2928	15	57869502	57892418	-	3145	protein_coding	Der1-like domain family, member 1 [Source:MGI Symbol;Acc:MGI:1915069]
ENSMUSG00000028557	Rnf11	46.5781	43.617	41.0726	32.3445	31.2373	31.5673	4	109451098	109484728	-	4263	protein_coding	ring finger protein 11 [Source:MGI Symbol;Acc:MGI:1352759]
ENSMUSG00000020108	Ddit4	17.9515	25.5278	24.261	28.7182	54.0445	75.7771	10	59949669	59951834	-	1755	protein_coding	DNA-damage-inducible transcript 4 [Source:MGI Symbol;Acc:MGI:1921997]
ENSMUSG00000053012	Krcc1	37.5856	42.3446	39.282	38.655	35.3842	32.6582	6	71271677	71285319	+	1913	protein_coding	lysine-rich coiled-coil 1 [Source:MGI Symbol;Acc:MGI:1889377]
ENSMUSG00000046722	Cdc42se1	31.5161	31.9883	30.3868	39.5744	50.2289	42.1998	3	95228732	95236409	+	3258	protein_coding	CDC42 small effector 1 [Source:MGI Symbol;Acc:MGI:1889510]
ENSMUSG00000031954	Cfdp1	34.6915	35.9232	37.1589	36.9454	38.0641	42.9937	8	111768491	111854291	-	1178	protein_coding	craniofacial development protein 1 [Source:MGI Symbol;Acc:MGI:1344403]
ENSMUSG00000086043	Gm12473	36.7673	37.946	41.628	33.5852	26.641	49.0594	4	43631539	43641533	-	579	antisense_RNA	predicted gene 12473 [Source:MGI Symbol;Acc:MGI:3652337]
ENSMUSG00000019818	Cd164	39.1348	35.8031	37.9675	38.4059	38.4608	35.8178	10	41519414	41531048	+	4449	protein_coding	CD164 antigen [Source:MGI Symbol;Acc:MGI:1859568]
ENSMUSG00000019066	Rab3d	35.4837	48.2292	44.197	33.7858	34.3759	29.0439	9	21907491	21918192	-	4196	protein_coding	RAB3D, member RAS oncogene family [Source:MGI Symbol;Acc:MGI:97844]
ENSMUSG00000025035	Arl3	43.1116	42.6492	42.5289	30.3085	27.8486	38.61	19	46531109	46573085	-	822	protein_coding	ADP-ribosylation factor-like 3 [Source:MGI Symbol;Acc:MGI:1929699]
ENSMUSG00000068882	Ssb	34.8313	36.3747	35.1128	37.5011	40.6634	40.5125	2	69861562	69871846	+	2160	protein_coding	Sjogren syndrome antigen B [Source:MGI Symbol;Acc:MGI:98423]
ENSMUSG00000020664	Dld	43.0145	39.9296	40.8748	32.3977	29.6849	38.7551	12	31331277	31351453	-	3683	protein_coding	dihydrolipoamide dehydrogenase [Source:MGI Symbol;Acc:MGI:107450]
ENSMUSG00000033327	Tnxb	43.0907	38.7725	38.4637	35.2391	32.4222	36.1134	17	34670535	34719815	+	12209	protein_coding	tenascin XB [Source:MGI Symbol;Acc:MGI:1932137]
ENSMUSG00000078153	Psme2b	27.0173	35.8361	26.5951	33.8219	47.1019	53.5928	11	48945354	48946190	-	837	protein_coding	protease (prosome, macropain) activator subunit 2B [Source:MGI Symbol;Acc:MGI:1341073]
ENSMUSG00000079562	Maea	37.3817	38.17	42.7334	34.3668	35.5471	35.6933	5	33335509	33373296	+	2629	protein_coding	macrophage erythroblast attacher [Source:MGI Symbol;Acc:MGI:1891748]
ENSMUSG00000025208	Mrpl43	37.2499	36.6192	34.3624	34.6797	40.1787	40.7917	19	45005014	45006442	-	1213	protein_coding	mitochondrial ribosomal protein L43 [Source:MGI Symbol;Acc:MGI:2137229]
ENSMUSG00000027091	Zc3h15	37.2297	38.1894	36.1037	37.2332	38.1559	36.8116	2	83644435	83664622	+	2789	protein_coding	zinc finger CCCH-type containing 15 [Source:MGI Symbol;Acc:MGI:1919747]
ENSMUSG00000031838	Ifi30	24.228	30.5271	29.7981	45.3534	48.3844	45.4288	8	70762774	70766663	-	981	processed_transcript	interferon gamma inducible protein 30 [Source:MGI Symbol;Acc:MGI:2137648]
ENSMUSG00000024308	Tapbp	27.8066	40.7923	28.1931	35.6264	42.9162	48.2591	17	33915899	33929288	+	3296	protein_coding	TAP binding protein [Source:MGI Symbol;Acc:MGI:1201689]
ENSMUSG00000049422	Chchd10	52.8441	41.2425	41.167	24.5811	23.2341	40.4866	10	75933130	75937747	+	1575	protein_coding	coiled-coil-helix-coiled-coil-helix domain containing 10 [Source:MGI Symbol;Acc:MGI:2143558]
ENSMUSG00000004056	Akt2	45.7448	39.1088	44.3797	32.4884	29.2998	32.416	7	27591552	27640826	+	7131	protein_coding	thymoma viral proto-oncogene 2 [Source:MGI Symbol;Acc:MGI:104874]
ENSMUSG00000030541	Idh2	44.102	35.1944	37.8879	35.2691	29.2781	41.6823	7	80094846	80115392	-	2588	protein_coding	isocitrate dehydrogenase 2 (NADP+), mitochondrial [Source:MGI Symbol;Acc:MGI:96414]
ENSMUSG00000028603	Scp2	39.4659	38.0672	37.614	38.3263	33.1214	36.6325	4	108043839	108144998	-	3478	protein_coding	sterol carrier protein 2, liver [Source:MGI Symbol;Acc:MGI:98254]
ENSMUSG00000013701	Timm23	35.3277	33.9098	39.3985	26.9359	40.4041	47.0138	14	32180162	32201898	-	1786	protein_coding	translocase of inner mitochondrial membrane 23 [Source:MGI Symbol;Acc:MGI:1858317]
ENSMUSG00000060621	Nkpd1	30.5067	35.74	38.3738	36.4282	43.0642	38.5507	7	19517838	19525056	+	2916	protein_coding	NTPase, KAP family P-loop domain containing 1 [Source:MGI Symbol;Acc:MGI:1916797]
ENSMUSG00000005514	Por	37.7934	46.9548	42.9377	27.218	38.1063	29.4482	5	135670033	135735326	+	4021	protein_coding	P450 (cytochrome) oxidoreductase [Source:MGI Symbol;Acc:MGI:97744]
ENSMUSG00000010660	Plcd1	28.6366	38.1884	37.337	36.0115	50.07	31.82	9	119071527	119093502	-	3093	protein_coding	phospholipase C, delta 1 [Source:MGI Symbol;Acc:MGI:97614]
ENSMUSG00000030678	Maz	40.8946	33.2219	36.914	31.1005	39.3976	40.4185	7	127022130	127027037	-	2976	protein_coding	MYC-associated zinc finger protein (purine-binding transcription factor) [Source:MGI Symbol;Acc:MGI:1338823]
ENSMUSG00000004937	Sgta	35.2117	34.0781	34.6133	36.0149	42.3936	39.333	10	81044075	81060181	-	2876	protein_coding	small glutamine-rich tetratricopeptide repeat (TPR)-containing, alpha [Source:MGI Symbol;Acc:MGI:1098703]
ENSMUSG00000040249	Lrp1	32.7996	30.6681	33.0184	37.3999	44.6504	42.9972	10	127538161	127621148	-	17717	protein_coding	low density lipoprotein receptor-related protein 1 [Source:MGI Symbol;Acc:MGI:96828]
ENSMUSG00000003420	Fcgrt	36.2398	39.696	33.9731	43.6543	28.7482	39.1139	7	45092990	45103851	-	2102	protein_coding	Fc receptor, IgG, alpha chain transporter [Source:MGI Symbol;Acc:MGI:103017]
ENSMUSG00000031078	Cttn	30.7146	35.6624	35.0207	37.6363	46.2599	35.9372	7	144435733	144471009	-	4192	protein_coding	cortactin [Source:MGI Symbol;Acc:MGI:99695]
ENSMUSG00000040824	Snrpd2	33.4404	35.2837	32.0325	38.1325	41.5257	40.4729	7	19149722	19153542	+	2618	protein_coding	small nuclear ribonucleoprotein D2 [Source:MGI Symbol;Acc:MGI:98345]
ENSMUSG00000028798	Eif3i	31.5814	36.7314	31.8944	40.3667	41.9108	38.2074	4	129591960	129600648	-	3702	protein_coding	eukaryotic translation initiation factor 3, subunit I [Source:MGI Symbol;Acc:MGI:1860763]
ENSMUSG00000089804	Gm16136	34.9019	49.1143	52.5322	29.4596	28.921	25.7188	15	37231921	37233309	-	1166	antisense_RNA	predicted gene 16136 [Source:MGI Symbol;Acc:MGI:3802137]
ENSMUSG00000097971	Gm26917	15.2294	12.4679	19.013	23.4581	110.294	39.8986	17	39843013	39846341	+	3329	lincRNA	predicted gene, 26917 [Source:MGI Symbol;Acc:MGI:5504032]
ENSMUSG00000022391	Rangap1	34.4403	34.8215	36.1511	33.5072	42.8001	38.4852	15	81704248	81729919	-	3211	protein_coding	RAN GTPase activating protein 1 [Source:MGI Symbol;Acc:MGI:103071]
ENSMUSG00000027861	Casq2	55.403	39.7148	48.6339	19.5816	16.3437	40.2496	3	102086415	102146514	+	2736	protein_coding	calsequestrin 2 [Source:MGI Symbol;Acc:MGI:1309469]
ENSMUSG00000010406	Mrpl52	35.4238	42.6374	34.3967	36.3415	36.6222	34.1013	14	54426909	54429756	+	1109	protein_coding	mitochondrial ribosomal protein L52 [Source:MGI Symbol;Acc:MGI:1916086]
ENSMUSG00000021807	2700060E02Rik	39.42	39.3601	35.5595	35.0791	32.7428	37.2193	14	19811351	19823824	-	1927	protein_coding	RIKEN cDNA 2700060E02 gene [Source:MGI Symbol;Acc:MGI:1915295]
ENSMUSG00000081094	Rpl19-ps11	27.4134	33.2155	29.0704	63.4936	35.124	30.8676	8	19492936	19493526	+	591	processed_pseudogene	ribosomal protein L19, pseudogene 11 [Source:MGI Symbol;Acc:MGI:3642193]
ENSMUSG00000042712	Tceal9	36.8115	38.3666	32.9911	37.419	33.7451	39.8428	X	136245079	136247139	+	1037	protein_coding	transcription elongation factor A like 9 [Source:MGI Symbol;Acc:MGI:109567]
ENSMUSG00000025171	Ubtd1	37.0367	41.3191	43.2438	30.3495	33.1257	33.7674	19	41981763	42034641	+	1527	protein_coding	ubiquitin domain containing 1 [Source:MGI Symbol;Acc:MGI:2385092]
ENSMUSG00000052915	Msl1	32.1334	33.3362	36.8656	31.3769	42.3381	42.6084	11	98795516	98807859	+	5433	protein_coding	male-specific lethal 1 homolog (Drosophila) [Source:MGI Symbol;Acc:MGI:1921276]
ENSMUSG00000056209	Npm3	30.5751	32.1099	32.0944	32.1703	49.4918	42.001	19	45747734	45749591	-	1187	protein_coding	nucleoplasmin 3 [Source:MGI Symbol;Acc:MGI:894653]
ENSMUSG00000005469	Prkaca	43.5035	36.1674	41.6325	31.9369	29.4986	35.5901	8	83972993	83996443	+	2488	protein_coding	protein kinase, cAMP dependent, catalytic, alpha [Source:MGI Symbol;Acc:MGI:97592]
ENSMUSG00000062397	Zfp706	34.1941	35.7163	36.0542	37.8299	42.3443	32.1649	15	36997031	37007402	-	4413	protein_coding	zinc finger protein 706 [Source:MGI Symbol;Acc:MGI:1915286]
ENSMUSG00000022090	Pdlim2	35.7151	48.6568	49.1661	29.1246	30.1052	24.8081	14	70164218	70177681	-	4486	protein_coding	PDZ and LIM domain 2 [Source:MGI Symbol;Acc:MGI:2384850]
ENSMUSG00000028426	Rad23b	33.6358	35.1325	31.4185	36.9034	44.6809	35.7001	4	55350043	55392237	+	5733	protein_coding	RAD23 homolog B, nucleotide excision repair protein [Source:MGI Symbol;Acc:MGI:105128]
ENSMUSG00000058709	Egln2	38.2285	39.8646	38.434	34.268	33.2883	33.216	7	27158658	27166802	-	2800	protein_coding	egl-9 family hypoxia-inducible factor 2 [Source:MGI Symbol;Acc:MGI:1932287]
ENSMUSG00000005575	Ube2m	34.9851	37.752	34.1641	33.4687	39.8929	36.8967	7	13035120	13038275	-	2357	protein_coding	ubiquitin-conjugating enzyme E2M [Source:MGI Symbol;Acc:MGI:108278]
ENSMUSG00000078619	Smarcd2	33.8741	39.6978	41.6401	31.5753	38.0409	32.3198	11	106263179	106272972	-	3589	protein_coding	SWI/SNF related, matrix associated, actin dependent regulator of chromatin, subfamily d, member 2 [Source:MGI Symbol;Acc:MGI:1933621]
ENSMUSG00000026260	Ndufa10	41.939	39.3169	41.2773	29.9437	29.8291	34.7105	1	92439010	92473860	-	3331	protein_coding	NADH dehydrogenase (ubiquinone) 1 alpha subcomplex 10 [Source:MGI Symbol;Acc:MGI:1914523]
ENSMUSG00000032702	Kank1	37.95	46.221	47.6424	28.7554	30.512	25.8371	19	25236975	25434496	+	6166	protein_coding	KN motif and ankyrin repeat domains 1 [Source:MGI Symbol;Acc:MGI:2147707]
ENSMUSG00000032091	Tmprss4	13.919	18.1531	16.5996	48.472	61.9563	57.8018	9	45172726	45204092	-	2589	protein_coding	transmembrane protease, serine 4 [Source:MGI Symbol;Acc:MGI:2384877]
ENSMUSG00000065990	Aurkaip1	35.0017	38.2695	35.3611	33.7328	34.636	39.787	4	155831272	155833130	+	1766	protein_coding	aurora kinase A interacting protein 1 [Source:MGI Symbol;Acc:MGI:1913327]
ENSMUSG00000068039	Tcp1	35.3793	38.2955	35.2057	34.2765	38.2023	35.1832	17	12915701	12925067	+	5030	protein_coding	t-complex protein 1 [Source:MGI Symbol;Acc:MGI:98535]
ENSMUSG00000042363	Lgalsl	39.4337	42.8295	39.4276	33.2935	29.9781	31.559	11	20823576	20831056	-	4115	protein_coding	lectin, galactoside binding-like [Source:MGI Symbol;Acc:MGI:1916114]
ENSMUSG00000027499	Pkia	63.633	46.787	50.642	22.7762	11.4991	20.9426	3	7366669	7445366	+	3721	protein_coding	protein kinase inhibitor, alpha [Source:MGI Symbol;Acc:MGI:104747]
ENSMUSG00000022337	Emc2	41.0994	38.21	36.4791	36.3738	27.8767	36.2306	15	43477229	43527777	+	1245	protein_coding	ER membrane protein complex subunit 2 [Source:MGI Symbol;Acc:MGI:1913986]
ENSMUSG00000094989	Rpl9-ps4	28.4984	41.7406	36.5535	46.6842	33.6555	29.1335	13	72454762	72455340	-	579	processed_pseudogene	ribosomal protein L9, pseudogene 4 [Source:MGI Symbol;Acc:MGI:3704410]
ENSMUSG00000052310	Slc39a1	29.3302	29.3364	28.4173	43.3115	45.2586	40.5754	3	90248172	90253612	+	2364	protein_coding	solute carrier family 39 (zinc transporter), member 1 [Source:MGI Symbol;Acc:MGI:1353474]
ENSMUSG00000025260	Hsd17b10	40.0799	39.0416	39.4401	31.2197	30.4047	35.5213	X	152001845	152004442	+	1298	protein_coding	hydroxysteroid (17-beta) dehydrogenase 10 [Source:MGI Symbol;Acc:MGI:1333871]
ENSMUSG00000019558	Slc6a8	34.3621	32.2511	35.3944	32.4068	43.5046	37.621	X	73673150	73682502	+	5210	protein_coding	solute carrier family 6 (neurotransmitter transporter, creatine), member 8 [Source:MGI Symbol;Acc:MGI:2147834]
ENSMUSG00000036606	Plxnb2	27.988	32.0765	33.8218	35.7206	44.6663	41.2581	15	89155549	89171120	-	7119	protein_coding	plexin B2 [Source:MGI Symbol;Acc:MGI:2154239]
ENSMUSG00000114277	AC154176.1	17.6819	39.0784	23.994	53.7156	51.4668	29.5337	13	60641790	60642009	+	220	processed_pseudogene
ENSMUSG00000001380	Hars	28.9788	32.6669	29.2728	37.282	48.3537	38.7994	18	36766530	36783205	-	1987	protein_coding	histidyl-tRNA synthetase [Source:MGI Symbol;Acc:MGI:108087]
ENSMUSG00000024747	Aldh1a7	49.41	78.7873	59.2717	11.7387	7.22789	8.68887	19	20692953	20727562	-	2066	protein_coding	aldehyde dehydrogenase family 1, subfamily A7 [Source:MGI Symbol;Acc:MGI:1347050]
ENSMUSG00000002812	Flii	36.3935	36.0091	38.493	35.3704	32.8503	35.7072	11	60714123	60727263	-	5039	protein_coding	flightless I actin binding protein [Source:MGI Symbol;Acc:MGI:1342286]
ENSMUSG00000013698	Pea15a	39.2157	42.6906	41.6344	32.7314	26.3082	32.2327	1	172196728	172206804	-	3861	protein_coding	phosphoprotein enriched in astrocytes 15A [Source:MGI Symbol;Acc:MGI:104799]
ENSMUSG00000030510	Cers3	25.2468	37.9195	34.5808	38.9622	44.023	33.8983	7	66743504	66823691	+	3256	protein_coding	ceramide synthase 3 [Source:MGI Symbol;Acc:MGI:2681008]
ENSMUSG00000027342	Pcna	24.5086	29.9909	25.0447	38.5646	56.9212	39.4809	2	132249162	132253314	-	2400	protein_coding	proliferating cell nuclear antigen [Source:MGI Symbol;Acc:MGI:97503]
ENSMUSG00000036402	Gng12	36.1369	42.2557	42.2242	30.9233	34.602	28.2484	6	66896397	67021350	+	4727	protein_coding	guanine nucleotide binding protein (G protein), gamma 12 [Source:MGI Symbol;Acc:MGI:1336171]
ENSMUSG00000032285	Dnaja4	53.6935	40.9754	50.4232	22.6925	19.2148	27.2948	9	54698873	54716315	+	3589	protein_coding	DnaJ heat shock protein family (Hsp40) member A4 [Source:MGI Symbol;Acc:MGI:1927638]
ENSMUSG00000022358	Fbxo32	45.7551	45.1389	46.9772	32.9059	19.1399	24.374	15	58175879	58214892	-	6936	protein_coding	F-box protein 32 [Source:MGI Symbol;Acc:MGI:1914981]
ENSMUSG00000018287	Spag7	46.5601	37.7259	41.3532	27.4997	31.4057	29.7461	11	70663771	70669416	-	1480	protein_coding	sperm associated antigen 7 [Source:MGI Symbol;Acc:MGI:107380]
ENSMUSG00000011096	Akt1s1	37.2371	35.5887	38.1272	31.3774	35.2018	36.6201	7	44848991	44855421	+	3072	protein_coding	AKT1 substrate 1 (proline-rich) [Source:MGI Symbol;Acc:MGI:1914855]
ENSMUSG00000095526	Gm10243	18.8705	28.973	26.3201	74.6832	29.3206	35.7716	6	48523518	48523850	+	333	processed_pseudogene	predicted gene 10243 [Source:MGI Symbol;Acc:MGI:3704266]
ENSMUSG00000020361	Hspa4	39.4842	32.7978	34.7096	32.2256	38.6792	35.9466	11	53259814	53300457	-	5528	protein_coding	heat shock protein 4 [Source:MGI Symbol;Acc:MGI:1342292]
ENSMUSG00000030751	Psma1	32.8426	32.9581	33.3173	36.1034	41.2883	37.234	7	114264606	114276118	-	2952	protein_coding	proteasome (prosome, macropain) subunit, alpha type 1 [Source:MGI Symbol;Acc:MGI:1347005]
ENSMUSG00000059461	Gm7331	19.993	26.4113	34.6147	65.7435	31.4837	35.3004	X	162566857	162567243	+	387	processed_pseudogene	predicted gene 7331 [Source:MGI Symbol;Acc:MGI:3644702]
ENSMUSG00000053279	Aldh1a1	58.2992	49.4275	45.0854	22.5211	17.3027	20.8588	19	20492715	20643462	+	4934	protein_coding	aldehyde dehydrogenase family 1, subfamily A1 [Source:MGI Symbol;Acc:MGI:1353450]
ENSMUSG00000021288	Klc1	37.5065	32.9174	35.1406	31.4731	39.724	36.6767	12	111758849	111807844	+	4070	protein_coding	kinesin light chain 1 [Source:MGI Symbol;Acc:MGI:107978]
ENSMUSG00000017009	Sdc4	35.3964	35.2921	34.9589	34.0017	41.137	32.5744	2	164424247	164443887	-	2547	protein_coding	syndecan 4 [Source:MGI Symbol;Acc:MGI:1349164]
ENSMUSG00000021737	Psmd6	34.6102	35.3954	33.383	34.8822	36.8339	38.1694	14	14112174	14120984	-	2800	protein_coding	proteasome (prosome, macropain) 26S subunit, non-ATPase, 6 [Source:MGI Symbol;Acc:MGI:1913663]
ENSMUSG00000025499	Hras	29.4526	33.9442	31.5895	32.6725	47.8158	37.5331	7	141189105	141194005	-	3733	protein_coding	Harvey rat sarcoma virus oncogene [Source:MGI Symbol;Acc:MGI:96224]
ENSMUSG00000090136	Gm10177	30.2314	36.4673	26.5818	49.7557	34.9261	34.8961	9	37252922	37253365	+	444	transcribed_processed_pseudogene	predicted gene 10177 [Source:MGI Symbol;Acc:MGI:3704330]
ENSMUSG00000004945	Tmem242	42.5614	42.9004	41.3951	29.6446	26.084	30.2457	17	5410870	5440259	-	1837	protein_coding	transmembrane protein 242 [Source:MGI Symbol;Acc:MGI:1917794]
ENSMUSG00000022463	Srebf2	29.1838	33.8808	34.427	31.2085	47.0188	36.7329	15	82147266	82205376	+	4989	protein_coding	sterol regulatory element binding factor 2 [Source:MGI Symbol;Acc:MGI:107585]
ENSMUSG00000063015	Ccni	38.7743	37.4378	37.9032	34.4295	31.9326	31.8649	5	93181933	93206495	-	3303	protein_coding	cyclin I [Source:MGI Symbol;Acc:MGI:1341077]
ENSMUSG00000079884	Gm10698	28.6635	30.4446	30.6708	47.8181	41.0243	33.7201	9	33728247	33728850	+	604	processed_pseudogene	predicted gene 10698 [Source:MGI Symbol;Acc:MGI:3704329]
ENSMUSG00000020473	Aebp1	32.6769	32.0496	32.6674	44.1275	33.2501	37.5447	11	5861947	5872088	+	4058	protein_coding	AE binding protein 1 [Source:MGI Symbol;Acc:MGI:1197012]
ENSMUSG00000022314	Rad21	34.7175	34.4171	37.2662	35.9097	37.1768	32.8093	15	51962605	51991760	-	3604	protein_coding	RAD21 cohesin complex component [Source:MGI Symbol;Acc:MGI:108016]
ENSMUSG00000008540	Mgst1	36.9926	37.6785	31.2449	37.2386	32.3221	36.6844	6	138140316	138156755	+	2013	protein_coding	microsomal glutathione S-transferase 1 [Source:MGI Symbol;Acc:MGI:1913850]
ENSMUSG00000061613	U2af1	34.277	31.8744	32.5175	33.5918	43.4251	36.3049	17	31647082	31658754	-	974	protein_coding	U2 small nuclear ribonucleoprotein auxiliary factor (U2AF) 1 [Source:MGI Symbol;Acc:MGI:98884]
ENSMUSG00000005981	Trap1	36.6668	37.0517	36.9862	31.4817	34.1842	35.418	16	4039971	4077827	-	2573	protein_coding	TNF receptor-associated protein 1 [Source:MGI Symbol;Acc:MGI:1915265]
ENSMUSG00000028398	Tmem261	39.3439	37.7072	39.3821	30.0512	28.4568	36.76	4	75277354	75278305	-	741	protein_coding	transmembrane protein 261 [Source:MGI Symbol;Acc:MGI:1914178]
ENSMUSG00000052681	Rap1b	30.9045	33.0065	28.94	39.6609	37.1409	41.6213	10	117813871	117846035	-	2884	protein_coding	RAS related protein 1b [Source:MGI Symbol;Acc:MGI:894315]
ENSMUSG00000030787	Lyve1	34.6491	31.4653	25.6586	51.2703	30.9193	37.2126	7	110850607	110863239	-	2919	protein_coding	lymphatic vessel endothelial hyaluronan receptor 1 [Source:MGI Symbol;Acc:MGI:2136348]
ENSMUSG00000046229	Scand1	33.6235	37.0647	33.4617	30.6747	36.9164	39.3454	2	156311847	156312704	-	759	protein_coding	SCAN domain-containing 1 [Source:MGI Symbol;Acc:MGI:1343132]
ENSMUSG00000062908	Acadm	47.5215	43.3805	43.7665	28.1157	18.4625	29.814	3	153922357	153944632	-	3913	protein_coding	acyl-Coenzyme A dehydrogenase, medium chain [Source:MGI Symbol;Acc:MGI:87867]
ENSMUSG00000037151	Lrrc20	48.4233	43.0843	46.7483	27.9295	19.0834	25.7853	10	61475801	61582791	+	3216	protein_coding	leucine rich repeat containing 20 [Source:MGI Symbol;Acc:MGI:2387182]
ENSMUSG00000045996	Polr2k	42.816	38.9601	34.2367	29.8912	27.744	37.3116	15	36174010	36177010	+	624	protein_coding	polymerase (RNA) II (DNA directed) polypeptide K [Source:MGI Symbol;Acc:MGI:102725]
ENSMUSG00000022744	Cldnd1	30.1551	35.2768	30.9907	38.3658	43.5853	32.5823	16	58727910	58734251	+	2563	protein_coding	claudin domain containing 1 [Source:MGI Symbol;Acc:MGI:2447860]
ENSMUSG00000053398	Phgdh	24.0734	24.1118	24.1182	32.5302	60.3647	45.7381	3	98313170	98339990	-	2486	protein_coding	3-phosphoglycerate dehydrogenase [Source:MGI Symbol;Acc:MGI:1355330]
ENSMUSG00000024847	Aip	37.5393	33.7568	36.0958	34.7614	31.43	37.0486	19	4114446	4125858	-	1937	protein_coding	aryl-hydrocarbon receptor-interacting protein [Source:MGI Symbol;Acc:MGI:109622]
ENSMUSG00000027925	Sprr2j-ps	7.88118	14.9346	7.49186	30.6323	101.29	48.2847	3	92418082	92419396	+	678	protein_coding	small proline-rich protein 2J, pseudogene [Source:MGI Symbol;Acc:MGI:1330345]
ENSMUSG00000071662	Polr2g	35.2125	33.0155	33.9068	31.1407	37.2905	39.8267	19	8793129	8798557	-	868	protein_coding	polymerase (RNA) II (DNA directed) polypeptide G [Source:MGI Symbol;Acc:MGI:1914960]
ENSMUSG00000074227	Spint2	31.0379	38.9669	39.7757	29.5966	39.3224	31.6581	7	29256323	29281912	-	4556	protein_coding	serine protease inhibitor, Kunitz type 2 [Source:MGI Symbol;Acc:MGI:1338031]
ENSMUSG00000066116	Gm10154	32.7248	37.7782	26.0248	28.8983	39.6336	45.1798	4	83505185	83505538	-	354	processed_pseudogene	predicted gene 10154 [Source:MGI Symbol;Acc:MGI:3642271]
ENSMUSG00000037712	Fermt2	51.2491	39.9848	42.8195	28.4039	20.2274	27.4406	14	45458792	45530118	-	3746	protein_coding	fermitin family member 2 [Source:MGI Symbol;Acc:MGI:2385001]
ENSMUSG00000021493	Pdlim7	53.3617	41.6752	45.1876	21.8792	21.667	26.2235	13	55495795	55513676	-	4849	protein_coding	PDZ and LIM domain 7 [Source:MGI Symbol;Acc:MGI:1914649]
ENSMUSG00000033365	Ipo13	43.4385	37.5333	41.8798	26.916	26.3191	33.4825	4	117894486	117914999	-	4207	protein_coding	importin 13 [Source:MGI Symbol;Acc:MGI:2385205]
ENSMUSG00000021771	Vdac2	38.5077	35.2034	37.3517	32.1489	33.0155	33.2048	14	21825238	21845879	+	4769	protein_coding	voltage-dependent anion channel 2 [Source:MGI Symbol;Acc:MGI:106915]
ENSMUSG00000031431	Tsc22d3	35.6476	37.0019	35.6542	32.5252	33.3033	35.2985	X	140539528	140600659	-	4341	protein_coding	TSC22 domain family, member 3 [Source:MGI Symbol;Acc:MGI:1196284]
ENSMUSG00000043733	Ptpn11	44.1854	35.3182	39.7221	31.1171	29.1638	29.8867	5	121130533	121191397	-	7492	protein_coding	protein tyrosine phosphatase, non-receptor type 11 [Source:MGI Symbol;Acc:MGI:99511]
ENSMUSG00000001472	Tcf25	34.9277	37.058	35.3581	33.3779	34.8973	33.5519	8	123373753	123403835	+	5390	protein_coding	transcription factor 25 (basic helix-loop-helix) [Source:MGI Symbol;Acc:MGI:1914105]
ENSMUSG00000021702	Thbs4	48.9342	29.3923	37.5043	37.1099	25.7197	30.4936	13	92751590	92794818	-	3289	protein_coding	thrombospondin 4 [Source:MGI Symbol;Acc:MGI:1101779]
ENSMUSG00000029642	Polr1d	34.7403	35.4099	32.2882	32.8647	41.55	32.2744	5	147077050	147111597	+	3043	protein_coding	polymerase (RNA) I polypeptide D [Source:MGI Symbol;Acc:MGI:108403]
ENSMUSG00000054905	Stfa3	6.53664	6.72385	10.0323	46.3424	75.3771	64.0927	16	36450537	36455392	-	412	protein_coding	stefin A3 [Source:MGI Symbol;Acc:MGI:106196]
ENSMUSG00000024011	Pi16	37.9978	30.6317	32.1625	38.4323	29.2634	40.407	17	29318877	29329413	+	3987	protein_coding	peptidase inhibitor 16 [Source:MGI Symbol;Acc:MGI:1921366]
ENSMUSG00000022024	Sugt1	40.7318	40.7609	38.0064	32.9751	25.1697	31.1896	14	79587691	79629755	+	1951	protein_coding	SGT1, suppressor of G2 allele of SKP1 (S. cerevisiae) [Source:MGI Symbol;Acc:MGI:1915205]
ENSMUSG00000031751	Amfr	39.0645	36.3767	35.9752	31.4918	33.4389	32.427	8	93971588	94012842	-	4132	protein_coding	autocrine motility factor receptor [Source:MGI Symbol;Acc:MGI:1345634]
ENSMUSG00000056078	Lipm	40.516	52.7492	50.776	29.2714	16.1454	19.044	19	34100943	34122687	+	2701	protein_coding	lipase, family member M [Source:MGI Symbol;Acc:MGI:1926003]
ENSMUSG00000006299	Aamp	30.1631	33.2321	32.9064	34.1104	41.2022	36.8805	1	74279840	74284738	-	3458	protein_coding	angio-associated migratory protein [Source:MGI Symbol;Acc:MGI:107809]
ENSMUSG00000078486	Perm1	50.8894	41.9468	45.3564	23.6921	21.1589	25.3467	4	156215868	156221307	+	3901	protein_coding	PPARGC1 and ESRR induced regulator, muscle 1 [Source:MGI Symbol;Acc:MGI:1921433]
ENSMUSG00000032437	Stt3b	35.8711	33.4937	36.6678	37.7538	32.9088	31.5953	9	115242581	115310421	-	4221	protein_coding	STT3, subunit of the oligosaccharyltransferase complex, homolog B (S. cerevisiae) [Source:MGI Symbol;Acc:MGI:1915542]
ENSMUSG00000036305	Rpl39-ps	26.1302	27.8502	28.6168	63.4718	26.1169	35.6666	15	102634982	102635336	+	355	transcribed_processed_pseudogene	ribosomal protein L39, pseudogene [Source:MGI Symbol;Acc:MGI:3705781]
ENSMUSG00000061360	Phf5a	28.103	31.7567	31.5694	34.8712	44.2204	37.294	15	81865319	81871911	-	937	protein_coding	PHD finger protein 5A [Source:MGI Symbol;Acc:MGI:2156864]
ENSMUSG00000030435	U2af2	28.7478	29.9604	31.2983	31.8409	45.3631	40.5464	7	5062143	5079938	+	4113	protein_coding	U2 small nuclear ribonucleoprotein auxiliary factor (U2AF) 2 [Source:MGI Symbol;Acc:MGI:98886]
ENSMUSG00000074364	Ehd2	32.6264	32.6658	34.0002	36.7472	36.4322	35.1004	7	15946958	15967567	-	5119	protein_coding	EH-domain containing 2 [Source:MGI Symbol;Acc:MGI:2154274]
ENSMUSG00000056820	Tsnax	32.991	32.5448	30.6777	35.8433	39.3171	36.1634	8	125012997	125034192	+	3917	protein_coding	translin-associated factor X [Source:MGI Symbol;Acc:MGI:1855672]
ENSMUSG00000006717	Acot13	38.4383	37.6194	37.6838	32.4192	29.0037	32.3572	13	24817948	24831540	-	744	protein_coding	acyl-CoA thioesterase 13 [Source:MGI Symbol;Acc:MGI:1914084]
ENSMUSG00000043683	Fem1a	44.2025	37.4476	40.0013	27.8828	26.8018	30.9626	17	56256793	56263608	+	6816	protein_coding	feminization 1 homolog a (C. elegans) [Source:MGI Symbol;Acc:MGI:1335089]
ENSMUSG00000057666	Gapdh	85.5985	1.73346	45.6539	70.1165	1.39957	2.7713	6	125161715	125166467	-	4133	protein_coding	glyceraldehyde-3-phosphate dehydrogenase [Source:MGI Symbol;Acc:MGI:95640]
ENSMUSG00000004843	Chmp2b	35.5144	37.6799	40.0721	32.7953	31.2481	29.844	16	65539133	65562697	-	1838	protein_coding	charged multivesicular body protein 2B [Source:MGI Symbol;Acc:MGI:1916192]
ENSMUSG00000034708	Grn	27.1694	29.4219	27.666	40.3759	40.6818	41.5542	11	102430315	102437048	+	3474	protein_coding	granulin [Source:MGI Symbol;Acc:MGI:95832]
ENSMUSG00000060923	Acyp2	51.9608	43.5563	47.6061	25.5474	15.0216	23.0693	11	30505991	30649587	-	863	protein_coding	acylphosphatase 2, muscle type [Source:MGI Symbol;Acc:MGI:1922822]
ENSMUSG00000048096	Lmod1	56.6719	47.8593	49.8871	17.5687	13.5812	21.0677	1	135324807	135368065	+	3948	protein_coding	leiomodin 1 (smooth muscle) [Source:MGI Symbol;Acc:MGI:2135671]
ENSMUSG00000030688	Stard10	27.7267	32.6578	33.8443	29.1839	44.5009	38.5853	7	101317086	101346626	+	2419	protein_coding	START domain containing 10 [Source:MGI Symbol;Acc:MGI:1860093]
ENSMUSG00000031877	Ces2g	21.7685	33.9175	29.0516	39.8877	51.7911	30.0198	8	104961718	104969537	+	3574	protein_coding	carboxylesterase 2G [Source:MGI Symbol;Acc:MGI:1919611]
ENSMUSG00000048578	Mlec	36.3286	33.522	38.1595	30.2799	31.2036	36.8452	5	115142981	115158179	-	6007	protein_coding	malectin [Source:MGI Symbol;Acc:MGI:1924015]
ENSMUSG00000006818	Sod2	43.3624	37.4331	38.1826	28.2396	28.29	30.7366	17	13007839	13018119	+	3824	protein_coding	superoxide dismutase 2, mitochondrial [Source:MGI Symbol;Acc:MGI:98352]
ENSMUSG00000027502	Rtfdc1	33.2571	36.4722	35.9553	34.1719	34.6472	31.4739	2	172440556	172469908	+	2644	protein_coding	replication termination factor 2 domain containing 1 [Source:MGI Symbol;Acc:MGI:1913654]
ENSMUSG00000000278	Scpep1	34.0431	42.5011	39.5398	34.8848	26.1757	28.8194	11	88924020	88955465	-	2097	protein_coding	serine carboxypeptidase 1 [Source:MGI Symbol;Acc:MGI:1921867]
ENSMUSG00000064350	mt-Ty	77.8388	38.4951	46.0825	12.5045	7.34763	23.6225	MT	5260	5326	-	67	Mt_tRNA	mitochondrially encoded tRNA tyrosine [Source:MGI Symbol;Acc:MGI:102470]
ENSMUSG00000023277	Twf2	37.9179	34.8487	34.9816	32.3438	28.8355	36.8008	9	106203108	106215389	+	2319	protein_coding	twinfilin actin binding protein 2 [Source:MGI Symbol;Acc:MGI:1346078]
ENSMUSG00000002602	Axl	41.4395	38.1493	38.064	28.7278	27.1512	32.1913	7	25757273	25788705	-	5033	protein_coding	AXL receptor tyrosine kinase [Source:MGI Symbol;Acc:MGI:1347244]
ENSMUSG00000026766	Mmadhc	34.8439	36.5103	34.0077	32.1288	35.8249	32.1691	2	50279881	50296801	-	2012	protein_coding	methylmalonic aciduria (cobalamin deficiency) cblD type, with homocystinuria [Source:MGI Symbol;Acc:MGI:1923786]
ENSMUSG00000070394	Tmem256	41.5483	36.2217	37.9012	28.6916	26.4337	34.6017	11	69838514	69839618	+	1105	protein_coding	transmembrane protein 256 [Source:MGI Symbol;Acc:MGI:1916436]
ENSMUSG00000034088	Hdlbp	33.8808	32.5519	33.8738	34.6799	34.5771	35.6712	1	93405940	93478815	-	11320	protein_coding	high density lipoprotein (HDL) binding protein [Source:MGI Symbol;Acc:MGI:99256]
ENSMUSG00000021127	Zfp36l1	27.6501	30.8939	31.8779	28.8165	44.9209	41.0233	12	80107754	80113013	-	2990	protein_coding	zinc finger protein 36, C3H type-like 1 [Source:MGI Symbol;Acc:MGI:107946]
ENSMUSG00000078453	Abracl	22.4263	30.3491	25.984	37.038	44.7926	44.3322	10	18011260	18023288	-	1056	protein_coding	ABRA C-terminal like [Source:MGI Symbol;Acc:MGI:1920362]
ENSMUSG00000058704	Memo1	34.2715	35.9245	32.6836	33.0784	36.4419	32.4833	17	74200706	74294883	-	1513	protein_coding	mediator of cell motility 1 [Source:MGI Symbol;Acc:MGI:1924140]
ENSMUSG00000041168	Lonp1	35.9668	33.4321	34.0844	29.2875	34.7246	37.2644	17	56614301	56626903	-	2963	protein_coding	lon peptidase 1, mitochondrial [Source:MGI Symbol;Acc:MGI:1921392]
ENSMUSG00000056851	Pcbp2	36.0701	33.7901	33.6159	35.5157	35.8176	29.9015	15	102470632	102500059	+	2868	protein_coding	poly(rC) binding protein 2 [Source:MGI Symbol;Acc:MGI:108202]
ENSMUSG00000032050	Rdx	39.5223	36.4267	37.1639	32.4319	30.7483	28.3174	9	52047173	52088735	+	4639	protein_coding	radixin [Source:MGI Symbol;Acc:MGI:97887]
ENSMUSG00000015702	Anxa9	41.1803	54.8359	52.3452	24.2703	12.7051	18.8059	3	95296096	95307176	-	2073	protein_coding	annexin A9 [Source:MGI Symbol;Acc:MGI:1923711]
ENSMUSG00000028609	Magoh	28.8685	30.0842	27.4864	33.7297	40.598	43.327	4	107879755	107887424	+	770	protein_coding	mago homolog, exon junction complex core component [Source:MGI Symbol;Acc:MGI:1330312]
ENSMUSG00000001105	Ift20	32.4881	38.6171	37.7165	33.0784	28.7842	33.2655	11	78536361	78541737	+	1525	protein_coding	intraflagellar transport 20 [Source:MGI Symbol;Acc:MGI:1915585]
ENSMUSG00000051989	Smim11	44.0669	37.3452	41.1916	28.8976	21.1874	31.2376	16	92301286	92313041	+	972	protein_coding	small integral membrane protein 11 [Source:MGI Symbol;Acc:MGI:1916186]
ENSMUSG00000058076	Sdhc	43.0632	37.4311	38.6439	27.2574	25.4729	31.8463	1	171127165	171150603	-	3250	protein_coding	succinate dehydrogenase complex, subunit C, integral membrane protein [Source:MGI Symbol;Acc:MGI:1913302]
ENSMUSG00000046676	Lce1l	25.1381	75.422	45.1906	24.0218	12.9196	20.9494	3	92849949	92851286	-	670	protein_coding	late cornified envelope 1L [Source:MGI Symbol;Acc:MGI:1920980]
ENSMUSG00000018574	Acadvl	39.8828	37.1466	37.3955	26.3814	25.4149	37.4014	11	70010183	70015411	-	2686	protein_coding	acyl-Coenzyme A dehydrogenase, very long chain [Source:MGI Symbol;Acc:MGI:895149]
ENSMUSG00000040842	Szrd1	39.9337	35.445	35.5193	29.158	31.3323	31.7352	4	141113001	141139775	-	3327	protein_coding	SUZ RNA binding domain containing 1 [Source:MGI Symbol;Acc:MGI:1098672]
ENSMUSG00000069441	Dsg1a	27.7716	51.6265	41.0407	39.8762	28.362	14.445	18	20310811	20343350	+	5686	protein_coding	desmoglein 1 alpha [Source:MGI Symbol;Acc:MGI:94930]
ENSMUSG00000020467	Efemp1	42.8315	47.7625	41.2179	30.3274	16.736	24.1886	11	28853204	28926743	+	2037	protein_coding	epidermal growth factor-containing fibulin-like extracellular matrix protein 1 [Source:MGI Symbol;Acc:MGI:1339998]
ENSMUSG00000029998	Pcyox1	32.624	31.1153	33.0175	34.6626	37.1398	34.4889	6	86386006	86397154	-	4932	protein_coding	prenylcysteine oxidase 1 [Source:MGI Symbol;Acc:MGI:1914131]
ENSMUSG00000042541	Sem1	31.1374	33.0238	29.2438	35.5672	36.9357	37.0759	6	6557294	6578663	-	3542	protein_coding	SEM1, 26S proteasome complex subunit [Source:MGI Symbol;Acc:MGI:109238]
ENSMUSG00000038235	F11r	21.767	32.4814	30.257	38.73	45.7075	34.0177	1	171437535	171464603	+	2663	protein_coding	F11 receptor [Source:MGI Symbol;Acc:MGI:1321398]
ENSMUSG00000022964	Tmem50b	34.8831	36.5736	38.1737	30.8087	30.3741	32.0294	16	91574503	91597800	-	2446	protein_coding	transmembrane protein 50B [Source:MGI Symbol;Acc:MGI:1925225]
ENSMUSG00000021748	Pdhb	41.6736	35.6023	36.514	26.8155	26.3826	35.8249	14	8165996	8173025	-	3861	protein_coding	pyruvate dehydrogenase (lipoamide) beta [Source:MGI Symbol;Acc:MGI:1915513]
ENSMUSG00000027642	Rpn2	28.6206	30.9971	30.7561	37.7942	38.3757	35.9432	2	157279017	157326319	+	4430	protein_coding	ribophorin II [Source:MGI Symbol;Acc:MGI:98085]
ENSMUSG00000026234	Ncl	26.7906	31.1853	26.3023	33.1664	48.3005	36.6135	1	86344719	86359400	-	10188	protein_coding	nucleolin [Source:MGI Symbol;Acc:MGI:97286]
ENSMUSG00000002395	Use1	33.4141	33.7134	35.942	33.0461	29.8697	36.3375	8	71366848	71369732	+	2203	protein_coding	unconventional SNARE in the ER 1 homolog (S. cerevisiae) [Source:MGI Symbol;Acc:MGI:1914273]
ENSMUSG00000027808	Serp1	27.0892	31.7277	30.4452	38.0606	39.0402	35.824	3	58519817	58525892	-	4611	protein_coding	stress-associated endoplasmic reticulum protein 1 [Source:MGI Symbol;Acc:MGI:92638]
ENSMUSG00000020018	Snrpf	28.0019	30.7322	29.0927	34.6204	48.0284	31.6851	10	93583029	93589706	-	861	protein_coding	small nuclear ribonucleoprotein polypeptide F [Source:MGI Symbol;Acc:MGI:1917128]
ENSMUSG00000047731	Wbp1l	35.2095	33.0474	33.653	34.6495	34.0199	31.4219	19	46599084	46657389	+	4463	protein_coding	WW domain binding protein 1 like [Source:MGI Symbol;Acc:MGI:107577]
ENSMUSG00000050552	Lamtor4	32.9307	35.2899	33.9642	33.122	31.5086	35.0603	5	138255482	138259398	+	1302	protein_coding	late endosomal/lysosomal adaptor, MAPK and MTOR activator 4 [Source:MGI Symbol;Acc:MGI:1913346]
ENSMUSG00000031198	Fundc2	43.4229	39.9936	38.8198	29.4652	22.3461	27.8017	X	75382399	75396459	+	2785	protein_coding	FUN14 domain containing 2 [Source:MGI Symbol;Acc:MGI:1914641]
ENSMUSG00000064360	mt-Nd3	45.6956	26.2145	35.775	53.3447	15.5609	25.2534	MT	9459	9806	+	348	protein_coding	mitochondrially encoded NADH dehydrogenase 3 [Source:MGI Symbol;Acc:MGI:102499]
ENSMUSG00000028115	Bnipl	33.7216	43.5206	41.5821	27.0482	31.3263	23.9892	3	95241271	95251193	-	2297	protein_coding	BCL2/adenovirus E1B 19kD interacting protein like [Source:MGI Symbol;Acc:MGI:2384749]
ENSMUSG00000031948	Kars	29.8677	33.4145	32.7307	33.2588	37.1001	34.7924	8	111993443	112011323	-	4464	protein_coding	lysyl-tRNA synthetase [Source:MGI Symbol;Acc:MGI:1934754]
ENSMUSG00000024583	Txnl1	34.4587	32.3956	32.6087	31.8731	34.946	34.779	18	63662801	63692359	-	2558	protein_coding	thioredoxin-like 1 [Source:MGI Symbol;Acc:MGI:1860078]
ENSMUSG00000042675	Ypel3	32.5001	35.4859	31.5285	35.7436	33.8983	31.8687	7	126776955	126780514	+	1848	protein_coding	yippee-like 3 (Drosophila) [Source:MGI Symbol;Acc:MGI:1913340]
ENSMUSG00000020477	Mrps24	33.6207	33.8182	34.3768	30.2889	31.7336	37.1044	11	5703983	5715680	-	1466	protein_coding	mitochondrial ribosomal protein S24 [Source:MGI Symbol;Acc:MGI:1928142]
ENSMUSG00000052957	Gas1	31.097	27.2606	28.0024	39.389	35.3438	39.6105	13	60174405	60177365	-	2961	protein_coding	growth arrest specific 1 [Source:MGI Symbol;Acc:MGI:95655]
ENSMUSG00000022257	Laptm4b	39.5702	40.9645	38.3007	29.4973	25.6266	26.4787	15	34238026	34284295	+	1897	protein_coding	lysosomal-associated protein transmembrane 4B [Source:MGI Symbol;Acc:MGI:1890494]
ENSMUSG00000034075	Zdhhc5	31.3725	37.3147	36.6165	31.2168	34.2858	29.4613	2	84687970	84715180	-	5047	protein_coding	zinc finger, DHHC domain containing 5 [Source:MGI Symbol;Acc:MGI:1923573]
ENSMUSG00000032334	Loxl1	31.7786	25.2213	24.8012	42.7575	38.0628	37.5824	9	58287738	58313186	-	3297	protein_coding	lysyl oxidase-like 1 [Source:MGI Symbol;Acc:MGI:106096]
ENSMUSG00000007850	Hnrnph1	35.7376	30.7897	36.0321	33.4599	30.9543	33.216	11	50376990	50386528	+	5842	protein_coding	heterogeneous nuclear ribonucleoprotein H1 [Source:MGI Symbol;Acc:MGI:1891925]
ENSMUSG00000024097	Srsf7	31.4182	33.0712	32.8423	32.3311	33.2838	37.2274	17	80200089	80207305	-	2279	protein_coding	serine/arginine-rich splicing factor 7 [Source:MGI Symbol;Acc:MGI:1926232]
ENSMUSG00000021468	Sptlc1	22.7081	26.0303	24.7594	45.9549	39.0976	41.4744	13	53332748	53377397	-	3556	protein_coding	serine palmitoyltransferase, long chain base subunit 1 [Source:MGI Symbol;Acc:MGI:1099431]
ENSMUSG00000028383	Hsdl2	36.3698	42.1745	37.1487	29.4071	27.0364	27.7767	4	59581563	59618689	+	2795	protein_coding	hydroxysteroid dehydrogenase like 2 [Source:MGI Symbol;Acc:MGI:1919729]
ENSMUSG00000031502	Col4a1	33.229	25.9929	28.6357	38.6362	33.4779	39.9036	8	11198423	11312826	-	7464	protein_coding	collagen, type IV, alpha 1 [Source:MGI Symbol;Acc:MGI:88454]
ENSMUSG00000084786	Ubl5	34.5136	36.0422	33.0556	34.5588	31.1941	30.445	9	20642878	20647140	+	3468	protein_coding	ubiquitin-like 5 [Source:MGI Symbol;Acc:MGI:1913427]
ENSMUSG00000024309	Pfdn6	32.7862	32.4288	32.6844	31.8976	34.8001	35.1914	17	33938821	33940343	-	1193	protein_coding	prefoldin subunit 6 [Source:MGI Symbol;Acc:MGI:95908]
ENSMUSG00000068523	Gng5	35.1102	31.3177	30.7978	30.8106	34.0806	37.5529	3	146499807	146505572	+	2765	protein_coding	guanine nucleotide binding protein (G protein), gamma 5 [Source:MGI Symbol;Acc:MGI:109164]
ENSMUSG00000029777	Gars	28.9598	31.3159	30.3838	35.3438	41.9318	31.6616	6	55038007	55079500	+	3119	protein_coding	glycyl-tRNA synthetase [Source:MGI Symbol;Acc:MGI:2449057]
ENSMUSG00000000078	Klf6	31.6591	37.3855	33.2295	38.1399	33.3258	25.7242	13	5861482	5870394	+	4391	protein_coding	Kruppel-like factor 6 [Source:MGI Symbol;Acc:MGI:1346318]
ENSMUSG00000051255	Gm6563	41.9113	32.5379	29.4552	32.069	32.2907	31.1537	19	23675844	23676712	+	869	protein_coding	predicted pseudogene 6563 [Source:MGI Symbol;Acc:MGI:3646907]
ENSMUSG00000020150	Gamt	55.033	44.1571	46.0398	22.3833	10.8243	20.9116	10	80258151	80261012	-	1444	protein_coding	guanidinoacetate methyltransferase [Source:MGI Symbol;Acc:MGI:1098221]
ENSMUSG00000030224	Strap	34.5439	32.6454	29.4603	32.3505	35.9659	34.2636	6	137735078	137751932	+	3090	protein_coding	serine/threonine kinase receptor associated protein [Source:MGI Symbol;Acc:MGI:1329037]
ENSMUSG00000016554	Eif3d	27.4838	30.633	32.278	31.4897	40.9169	36.1767	15	77958998	77970824	-	1910	protein_coding	eukaryotic translation initiation factor 3, subunit D [Source:MGI Symbol;Acc:MGI:1933181]
ENSMUSG00000027195	Hsd17b12	31.7898	38.2973	32.2958	30.9782	36.4054	29.1395	2	94032689	94157964	-	2407	protein_coding	hydroxysteroid (17-beta) dehydrogenase 12 [Source:MGI Symbol;Acc:MGI:1926967]
ENSMUSG00000025431	Crisp1	25.7813	87.0586	44.6994	14.9163	8.54672	17.766	17	40293758	40319207	-	1416	protein_coding	cysteine-rich secretory protein 1 [Source:MGI Symbol;Acc:MGI:102553]
ENSMUSG00000015605	Srf	36.5333	32.6157	33.6534	30.4667	31.8732	33.5501	17	46546839	46556162	-	4093	protein_coding	serum response factor [Source:MGI Symbol;Acc:MGI:106658]
ENSMUSG00000039953	Clstn1	28.7368	30.0898	29.6849	29.6614	46.4625	33.8776	4	149586468	149648899	+	4662	protein_coding	calsyntenin 1 [Source:MGI Symbol;Acc:MGI:1929895]
ENSMUSG00000028953	Abcf2	35.7755	34.3578	34.2331	29.6426	32.6246	31.7605	5	24565345	24577467	-	2569	protein_coding	ATP-binding cassette, sub-family F (GCN20), member 2 [Source:MGI Symbol;Acc:MGI:1351657]
ENSMUSG00000009185	Ccl8	4.93562	14.3942	0.877083	90.347	40.1412	47.6817	11	82115185	82116799	+	511	protein_coding	chemokine (C-C motif) ligand 8 [Source:MGI Symbol;Acc:MGI:101878]
ENSMUSG00000003865	Gys1	46.3002	34.5378	41.1888	23.7462	20.6106	31.9181	7	45434844	45456619	+	4789	protein_coding	glycogen synthase 1, muscle [Source:MGI Symbol;Acc:MGI:101805]
ENSMUSG00000068823	Csde1	41.7124	37.2873	38.6943	28.6847	25.5357	26.3417	3	103020426	103058186	+	10902	protein_coding	cold shock domain containing E1, RNA binding [Source:MGI Symbol;Acc:MGI:92356]
ENSMUSG00000070343	Gm10288	24.7569	27.4834	28.006	59.2037	26.4328	32.3428	3	146838811	146839347	-	537	processed_pseudogene	predicted gene 10288 [Source:MGI Symbol;Acc:MGI:3704227]
ENSMUSG00000040813	Tex264	30.7592	40.7493	40.1128	30.2097	28.52	27.8247	9	106658746	106685927	-	2874	protein_coding	testis expressed gene 264 [Source:MGI Symbol;Acc:MGI:1096570]
ENSMUSG00000078964	Ces1b	33.0401	44.0417	41.6342	24.6518	28.7003	26.0844	8	93056728	93080017	-	1964	protein_coding	carboxylesterase 1B [Source:MGI Symbol;Acc:MGI:3779470]
ENSMUSG00000024875	Yif1a	34.5015	37.0455	38.2247	30.066	27.3678	30.7703	19	5088538	5092879	+	1493	protein_coding	Yip1 interacting factor homolog A (S. cerevisiae) [Source:MGI Symbol;Acc:MGI:1915340]
ENSMUSG00000051853	Arf3	27.4288	30.9579	30.8371	32.9017	40.6821	35.0938	15	98737621	98763214	-	3837	protein_coding	ADP-ribosylation factor 3 [Source:MGI Symbol;Acc:MGI:99432]
ENSMUSG00000044285	Gm1821	28.8701	30.1111	31.3227	49.1434	29.7277	28.6722	14	46084126	46084815	+	690	processed_pseudogene	predicted gene 1821 [Source:MGI Symbol;Acc:MGI:3037679]
ENSMUSG00000063480	Snu13	32.2714	34.0616	31.0015	29.8106	36.1129	34.4738	15	82041319	82047598	-	2130	protein_coding	SNU13 homolog, small nuclear ribonucleoprotein (U4/U6.U5) [Source:MGI Symbol;Acc:MGI:893586]
ENSMUSG00000047714	Ppp1r2	36.4509	34.0039	34.4442	31.502	30.8791	30.4215	16	31251537	31275277	-	4440	protein_coding	protein phosphatase 1, regulatory (inhibitor) subunit 2 [Source:MGI Symbol;Acc:MGI:1914099]
ENSMUSG00000016534	Lamp2	31.0313	33.8318	29.2214	37.4474	33.4439	32.6809	X	38401357	38456454	-	9552	protein_coding	lysosomal-associated membrane protein 2 [Source:MGI Symbol;Acc:MGI:96748]
ENSMUSG00000014226	Cacybp	37.3996	33.8534	36.0677	25.147	30.8798	34.2089	1	160202367	160212875	-	2390	protein_coding	calcyclin binding protein [Source:MGI Symbol;Acc:MGI:1270839]
ENSMUSG00000031207	Msn	25.9715	23.9454	25.4464	38.5473	40.8427	42.6968	X	96096042	96168552	+	6327	protein_coding	moesin [Source:MGI Symbol;Acc:MGI:97167]
ENSMUSG00000034845	Plvap	23.6219	21.5616	17.2679	46.4694	38.0099	50.4539	8	71497765	71511752	-	1987	protein_coding	plasmalemma vesicle associated protein [Source:MGI Symbol;Acc:MGI:1890497]
ENSMUSG00000003345	Csnk1g2	36.3376	33.6264	34.3802	27.6516	31.4703	33.9145	10	80622838	80640749	+	4835	protein_coding	casein kinase 1, gamma 2 [Source:MGI Symbol;Acc:MGI:1920014]
ENSMUSG00000015749	Anp32e	37.0175	31.9979	35.2195	29.7387	33.3164	29.8652	3	95929246	95947390	+	3566	protein_coding	acidic (leucine-rich) nuclear phosphoprotein 32 family, member E [Source:MGI Symbol;Acc:MGI:1913721]
ENSMUSG00000033953	Ppp3r1	42.2311	34.1351	34.6339	30.2162	28.6712	27.1474	11	17159263	17200375	+	3228	protein_coding	protein phosphatase 3, regulatory subunit B, alpha isoform (calcineurin B, type I) [Source:MGI Symbol;Acc:MGI:107172]
ENSMUSG00000025647	Shisa5	24.4142	32.2473	21.8559	34.0642	41.1238	43.305	9	109038565	109057777	+	3297	protein_coding	shisa family member 5 [Source:MGI Symbol;Acc:MGI:1915044]
ENSMUSG00000017776	Crk	31.9386	31.4647	30.89	34.9123	35.5688	32.0345	11	75679259	75706908	+	4730	protein_coding	v-crk avian sarcoma virus CT10 oncogene homolog [Source:MGI Symbol;Acc:MGI:88508]
ENSMUSG00000022110	Sucla2	43.2299	37.774	36.525	26.3817	23.1147	29.765	14	73525319	73596142	+	3988	protein_coding	succinate-Coenzyme A ligase, ADP-forming, beta subunit [Source:MGI Symbol;Acc:MGI:1306775]
ENSMUSG00000029718	Pcolce	33.5562	34.6818	31.8879	39.7581	24.1767	32.564	5	137605103	137613784	-	3823	protein_coding	procollagen C-endopeptidase enhancer protein [Source:MGI Symbol;Acc:MGI:105099]
ENSMUSG00000057933	Gsta2	31.3433	41.7973	36.5135	28.1353	36.4583	22.2936	9	78331018	78355788	-	1177	protein_coding	glutathione S-transferase, alpha 2 (Yc2) [Source:MGI Symbol;Acc:MGI:95863]
ENSMUSG00000028847	Trappc3	29.8027	32.3091	30.877	33.3821	35.6158	34.5526	4	126262325	126275883	+	1737	protein_coding	trafficking protein particle complex 3 [Source:MGI Symbol;Acc:MGI:1351486]
ENSMUSG00000068706	Gm10250	36.983	35.55	34.2748	27.2601	26.5113	35.8877	15	5120602	5121172	-	571	protein_coding	predicted pseudogene 10250 [Source:MGI Symbol;Acc:MGI:3642408]
ENSMUSG00000063902	Gm7964	28.7258	33.9329	27.9712	33.7911	42.3937	29.5903	7	83755904	83757281	+	1378	processed_pseudogene	predicted gene 7964 [Source:MGI Symbol;Acc:MGI:3646150]
ENSMUSG00000021794	Glud1	31.3315	29.8326	29.436	34.4865	35.6968	35.4062	14	34310727	34345144	+	4089	protein_coding	glutamate dehydrogenase 1 [Source:MGI Symbol;Acc:MGI:95753]
ENSMUSG00000028832	Stmn1	26.6894	28.404	34.3565	31.6373	38.6764	36.3843	4	134468320	134473843	+	1922	protein_coding	stathmin 1 [Source:MGI Symbol;Acc:MGI:96739]
ENSMUSG00000033955	Tnks1bp1	24.0075	29.1333	26.5744	35.2531	48.6068	32.4634	2	85048022	85073048	+	6184	protein_coding	tankyrase 1 binding protein 1 [Source:MGI Symbol;Acc:MGI:2446193]
ENSMUSG00000034484	Snx2	29.1991	32.9331	29.0926	34.8948	34.9104	34.905	18	53176365	53220860	+	2013	protein_coding	sorting nexin 2 [Source:MGI Symbol;Acc:MGI:1915054]
ENSMUSG00000024588	Fech	41.996	37.1102	39.0357	27.4966	22.8384	27.3935	18	64456550	64489066	-	2901	protein_coding	ferrochelatase [Source:MGI Symbol;Acc:MGI:95513]
ENSMUSG00000036352	Ubac1	45.3299	35.5497	40.0169	23.572	21.2759	30.0824	2	25998543	26021747	-	2632	protein_coding	ubiquitin associated domain containing 1 [Source:MGI Symbol;Acc:MGI:1920995]
ENSMUSG00000027170	Eif3m	30.7815	34.8906	30.4369	31.9901	32.8986	34.687	2	104999656	105017080	-	2590	protein_coding	eukaryotic translation initiation factor 3, subunit M [Source:MGI Symbol;Acc:MGI:1351744]
ENSMUSG00000021373	Cap2	44.6387	39.9303	44.3268	22.3708	16.246	28.0805	13	46501848	46650281	+	4159	protein_coding	CAP, adenylate cyclase-associated protein, 2 (yeast) [Source:MGI Symbol;Acc:MGI:1914502]
ENSMUSG00000091811	Inafm1	32.5733	36.603	35.278	29.6164	32.8705	28.5712	7	16272013	16273617	-	1605	protein_coding	InaF motif containing 1 [Source:MGI Symbol;Acc:MGI:1913550]
ENSMUSG00000093930	Hmgcs1	25.4773	31.9699	26.3411	34.1318	46.4358	31.1333	13	119690379	119708260	+	4594	protein_coding	3-hydroxy-3-methylglutaryl-Coenzyme A synthase 1 [Source:MGI Symbol;Acc:MGI:107592]
ENSMUSG00000034120	Srsf2	26.8942	26.4002	27.9971	32.1544	46.5302	35.3843	11	116849901	116853094	-	2958	protein_coding	serine/arginine-rich splicing factor 2 [Source:MGI Symbol;Acc:MGI:98284]
ENSMUSG00000055030	Sprr2e	0	0	0	24.6032	120.219	50.4694	3	92352143	92353449	+	647	protein_coding	small proline-rich protein 2E [Source:MGI Symbol;Acc:MGI:1330346]
ENSMUSG00000068290	Ddrgk1	35.158	33.1404	34.9834	32.2248	28.3469	31.4175	2	130653960	130664659	-	2084	protein_coding	DDRGK domain containing 1 [Source:MGI Symbol;Acc:MGI:1924256]
ENSMUSG00000001017	Chtop	35.9422	32.1612	35.0933	31.0616	31.617	29.0417	3	90498956	90509498	-	3637	protein_coding	chromatin target of PRMT1 [Source:MGI Symbol;Acc:MGI:1913761]
ENSMUSG00000015994	Fnta	34.8707	38.4542	35.5635	30.3482	26.5868	29.0804	8	25998722	26015650	-	3012	protein_coding	farnesyltransferase, CAAX box, alpha [Source:MGI Symbol;Acc:MGI:104683]
ENSMUSG00000040945	Rcc2	24.1773	25.8527	26.1998	31.5085	48.5281	38.6128	4	140700541	140723220	+	4155	protein_coding	regulator of chromosome condensation 2 [Source:MGI Symbol;Acc:MGI:1919784]
ENSMUSG00000063410	Stk24	31.9329	32.3593	33.6272	31.2586	35.7046	29.9925	14	121286343	121379334	-	2676	protein_coding	serine/threonine kinase 24 [Source:MGI Symbol;Acc:MGI:2385007]
ENSMUSG00000034308	Sdr42e1	36.8349	48.1178	43.7192	25.2312	17.1755	23.7055	8	117661399	117673689	-	2957	protein_coding	short chain dehydrogenase/reductase family 42E, member 1 [Source:MGI Symbol;Acc:MGI:1921282]
ENSMUSG00000061462	Obscn	46.4664	35.155	41.5892	24.2676	17.4401	29.7639	11	58994256	59136402	-	28898	protein_coding	obscurin, cytoskeletal calmodulin and titin-interacting RhoGEF [Source:MGI Symbol;Acc:MGI:2681862]
ENSMUSG00000039910	Cited2	35.3359	39.2675	45.6844	24.6407	22.9248	26.7327	10	17723218	17725674	+	2457	protein_coding	Cbp/p300-interacting transactivator, with Glu/Asp-rich carboxy-terminal domain, 2 [Source:MGI Symbol;Acc:MGI:1306784]
ENSMUSG00000022443	Myh9	23.1957	26.6115	24.6529	37.8974	39.4059	42.7874	15	77760587	77842175	-	12928	protein_coding	myosin, heavy polypeptide 9, non-muscle [Source:MGI Symbol;Acc:MGI:107717]
ENSMUSG00000075053	Vdac3-ps1	43.0482	36.8997	39.2903	24.0377	25.1051	26.1229	13	18030741	18031593	-	853	unprocessed_pseudogene	voltage-dependent anion channel 3, pseudogene 1 [Source:MGI Symbol;Acc:MGI:1270159]
ENSMUSG00000005397	Nid1	44.6315	35.6757	34.4927	29.2272	19.8651	30.6062	13	13437551	13512269	+	6943	protein_coding	nidogen 1 [Source:MGI Symbol;Acc:MGI:97342]
ENSMUSG00000010080	Epn3	23.1869	34.6093	34.04	32.277	37.1206	33.2628	11	94489599	94499974	-	4067	protein_coding	epsin 3 [Source:MGI Symbol;Acc:MGI:1919139]
ENSMUSG00000018965	Ywhah	30.4039	28.3175	30.7466	34.1322	36.1686	34.6205	5	33018816	33027966	+	3709	protein_coding	tyrosine 3-monooxygenase/tryptophan 5-monooxygenase activation protein, eta polypeptide [Source:MGI Symbol;Acc:MGI:109194]
ENSMUSG00000030062	Rpn1	27.2478	27.1734	27.9677	34.1266	40.9424	36.7393	6	88084482	88105304	+	4512	protein_coding	ribophorin I [Source:MGI Symbol;Acc:MGI:98084]
ENSMUSG00000002147	Stat6	28.7832	33.0062	34.1533	30.8925	34.6963	32.4913	10	127642986	127660957	+	4402	protein_coding	signal transducer and activator of transcription 6 [Source:MGI Symbol;Acc:MGI:103034]
ENSMUSG00000038803	Ost4	29.9434	34.5827	32.0247	33.9378	29.2846	34.1845	5	30905885	30907788	-	1272	protein_coding	oligosaccharyltransferase complex subunit 4 (non-catalytic) [Source:MGI Symbol;Acc:MGI:1914945]
ENSMUSG00000032281	Acsbg1	45.1316	48.8757	47.1044	23.0385	18.5315	10.9095	9	54604877	54661870	-	3604	protein_coding	acyl-CoA synthetase bubblegum family member 1 [Source:MGI Symbol;Acc:MGI:2385656]
ENSMUSG00000030401	Rtn2	45.7776	36.012	43.0323	23.6968	18.8613	26.1256	7	19282624	19296160	+	4585	protein_coding	reticulon 2 (Z-band associated protein) [Source:MGI Symbol;Acc:MGI:107612]
ENSMUSG00000057278	Snrpg	26.5743	30.0873	27.3101	32.8886	39.4303	37.1668	6	86371304	86379328	+	1570	protein_coding	small nuclear ribonucleoprotein polypeptide G [Source:MGI Symbol;Acc:MGI:1915261]
ENSMUSG00000055811	Cldn17	24.0728	48.7813	39.4736	25.4336	28.878	26.6888	16	88505807	88506978	-	1172	protein_coding	claudin 17 [Source:MGI Symbol;Acc:MGI:2652030]
ENSMUSG00000085442	Gm3362	26.6943	42.0228	27.3573	39.7422	31.9567	25.3833	15	37943327	37943792	-	466	processed_pseudogene	predicted pseudogene 3362 [Source:MGI Symbol;Acc:MGI:3781540]
ENSMUSG00000032249	Anp32a	35.2674	39.2087	37.4671	25.1672	25.8248	29.9944	9	62341293	62378812	+	3166	protein_coding	acidic (leucine-rich) nuclear phosphoprotein 32 family, member A [Source:MGI Symbol;Acc:MGI:108447]
ENSMUSG00000021957	Tkt	20.3479	29.8069	24.7606	34.9162	51.1423	31.9044	14	30548359	30574720	+	7355	protein_coding	transketolase [Source:MGI Symbol;Acc:MGI:105992]
ENSMUSG00000029063	Nadk	26.3422	26.2585	24.5871	33.4213	42.4038	39.8605	4	155562378	155591001	+	3747	protein_coding	NAD kinase [Source:MGI Symbol;Acc:MGI:2183149]
ENSMUSG00000073982	Rhog	25.9496	28.0857	26.4074	33.5991	38.3086	40.4769	7	102239123	102256054	-	1420	protein_coding	ras homolog family member G [Source:MGI Symbol;Acc:MGI:1928370]
ENSMUSG00000025144	Cenpx	32.1896	37.9616	33.153	31.4437	27.2352	30.6672	11	120710942	120713738	-	1077	protein_coding	centromere protein X [Source:MGI Symbol;Acc:MGI:894324]
ENSMUSG00000002477	Snrpd1	27.5791	30.0156	26.8331	30.819	40.9262	36.4252	18	10617796	10628230	+	837	protein_coding	small nuclear ribonucleoprotein D1 [Source:MGI Symbol;Acc:MGI:98344]
ENSMUSG00000024059	Clip4	33.0595	33.6163	33.8583	36.4286	32.6474	22.7509	17	71781947	71858351	+	4055	protein_coding	CAP-GLY domain containing linker protein family, member 4 [Source:MGI Symbol;Acc:MGI:1919100]
ENSMUSG00000032047	Acat1	38.6866	38.1541	35.3283	27.5505	20.9379	31.3318	9	53580522	53610382	-	3758	protein_coding	acetyl-Coenzyme A acetyltransferase 1 [Source:MGI Symbol;Acc:MGI:87870]
ENSMUSG00000024213	Nudt3	38.7664	32.9617	32.999	25.9842	29.6172	31.6178	17	27579382	27623465	-	2985	protein_coding	nudix (nucleotide diphosphate linked moiety X)-type motif 3 [Source:MGI Symbol;Acc:MGI:1928484]
ENSMUSG00000025544	Tm9sf2	32.0847	31.898	33.1939	33.4366	30.3292	30.9661	14	122107038	122159604	+	3107	protein_coding	transmembrane 9 superfamily member 2 [Source:MGI Symbol;Acc:MGI:1915309]
ENSMUSG00000030659	Nucb2	21.2729	27.047	22.2824	43.395	39.1411	38.6483	7	116504369	116540584	+	2331	protein_coding	nucleobindin 2 [Source:MGI Symbol;Acc:MGI:1858179]
ENSMUSG00000006498	Ptbp1	19.3446	25.2013	23.9013	35.4154	51.3149	36.3516	10	79854427	79864771	+	4740	protein_coding	polypyrimidine tract binding protein 1 [Source:MGI Symbol;Acc:MGI:97791]
ENSMUSG00000027680	Fxr1	46.5441	37.9666	39.988	23.3899	18.7248	24.5401	3	34019943	34070322	+	6553	protein_coding	fragile X mental retardation gene 1, autosomal homolog [Source:MGI Symbol;Acc:MGI:104860]
ENSMUSG00000030214	Plbd1	17.9562	26.5932	22.1286	35.9558	47.5059	40.9225	6	136612070	136661928	-	2633	protein_coding	phospholipase B domain containing 1 [Source:MGI Symbol;Acc:MGI:1914107]
ENSMUSG00000029810	Tmem176b	23.384	30.821	25.666	39.2781	27.9609	43.8986	6	48833818	48841496	-	2371	protein_coding	transmembrane protein 176B [Source:MGI Symbol;Acc:MGI:1916348]
ENSMUSG00000033044	Dhrs7c	52.1078	42.5206	43.564	18.0655	13.0264	21.7238	11	67798187	67816002	+	1877	protein_coding	dehydrogenase/reductase (SDR family) member 7C [Source:MGI Symbol;Acc:MGI:1915710]
ENSMUSG00000028273	Pdlim5	44.2933	35.6618	38.5791	25.8946	21.5543	24.9188	3	142239590	142395696	-	8877	protein_coding	PDZ and LIM domain 5 [Source:MGI Symbol;Acc:MGI:1927489]
ENSMUSG00000033287	Kctd17	26.602	29.4543	31.0601	29.1968	38.9673	35.5217	15	78428564	78438909	+	2134	protein_coding	potassium channel tetramerisation domain containing 17 [Source:MGI Symbol;Acc:MGI:1920094]
ENSMUSG00000063556	Gm10132	27.6763	32.454	34.5825	38.8186	29.1903	27.6778	14	77251847	77252314	-	468	processed_pseudogene	predicted gene 10132 [Source:MGI Symbol;Acc:MGI:3704449]
ENSMUSG00000022698	Naa50	33.2379	28.1766	30.1921	29.8551	38.6235	30.2519	16	44139830	44163366	+	4648	protein_coding	N(alpha)-acetyltransferase 50, NatE catalytic subunit [Source:MGI Symbol;Acc:MGI:1919367]
ENSMUSG00000020864	Ankrd40	42.5667	31.4076	37.7324	24.3221	24.7688	29.4243	11	94328001	94341841	+	4255	protein_coding	ankyrin repeat domain 40 [Source:MGI Symbol;Acc:MGI:1918702]
ENSMUSG00000032042	Srpr	29.4811	29.5321	29.0148	33.4644	35.3048	33.3672	9	35200175	35247973	+	3364	protein_coding	signal recognition particle receptor ('docking protein') [Source:MGI Symbol;Acc:MGI:1914648]
ENSMUSG00000028348	Cavin4	42.6851	39.368	44.8044	22.7344	15.3791	24.9617	4	48663514	48673502	+	2054	protein_coding	caveolae associated 4 [Source:MGI Symbol;Acc:MGI:1915266]
ENSMUSG00000025232	Hexa	32.4247	28.5713	26.6958	34.5734	27.3564	40.2103	9	59539540	59565109	+	1996	protein_coding	hexosaminidase A [Source:MGI Symbol;Acc:MGI:96073]
ENSMUSG00000002844	Adprh	34.9973	31.7713	32.1506	29.1645	29.2068	32.4939	16	38445399	38452689	-	1583	protein_coding	ADP-ribosylarginine hydrolase [Source:MGI Symbol;Acc:MGI:1098234]
ENSMUSG00000028763	Hspg2	36.5417	32.1054	34.1564	30.4938	24.0176	32.4072	4	137468769	137570630	+	14307	protein_coding	perlecan (heparan sulfate proteoglycan 2) [Source:MGI Symbol;Acc:MGI:96257]
ENSMUSG00000026478	Lamc1	34.6755	32.2997	31.5999	30.2619	28.7448	32.1338	1	153218922	153332786	-	8272	protein_coding	laminin, gamma 1 [Source:MGI Symbol;Acc:MGI:99914]
ENSMUSG00000019432	Ddx39b	30.6679	29.5564	33.0939	29.3033	35.7214	31.1578	17	35241746	35253707	+	3783	protein_coding	DEAD (Asp-Glu-Ala-Asp) box polypeptide 39B [Source:MGI Symbol;Acc:MGI:99240]
ENSMUSG00000053510	Nrd1	37.0718	38.6114	39.7623	28.0317	22.7415	23.2576	4	109000655	109061777	+	7140	protein_coding	nardilysin, N-arginine dibasic convertase, NRD convertase 1 [Source:MGI Symbol;Acc:MGI:1201386]
ENSMUSG00000021484	Lman2	37.62	32.107	34.6768	28.2218	29.0692	27.7668	13	55343833	55362783	-	7920	protein_coding	lectin, mannose-binding 2 [Source:MGI Symbol;Acc:MGI:1914140]
ENSMUSG00000007815	Rhoa	31.185	33.2374	32.136	32.3798	31.1103	29.3952	9	108306129	108337934	+	7494	protein_coding	ras homolog family member A [Source:MGI Symbol;Acc:MGI:1096342]
ENSMUSG00000000088	Cox5a	38.8004	30.9172	33.4915	26.4024	28.3909	31.2624	9	57521274	57532426	+	2101	protein_coding	cytochrome c oxidase subunit Va [Source:MGI Symbol;Acc:MGI:88474]
ENSMUSG00000021764	Ndufs4	40.2921	36.8091	34.5428	25.8851	20.6907	30.9929	13	114287795	114388258	-	2298	protein_coding	NADH dehydrogenase (ubiquinone) Fe-S protein 4 [Source:MGI Symbol;Acc:MGI:1343135]
ENSMUSG00000002944	Cd36	48.4274	34.8573	36.9538	27.4395	17.5182	23.7023	5	17781690	17888801	-	3590	protein_coding	CD36 antigen [Source:MGI Symbol;Acc:MGI:107899]
ENSMUSG00000042462	Dctpp1	27.5077	30.0988	23.9417	30.3315	40.5995	36.3515	7	127256959	127260709	-	676	protein_coding	dCTP pyrophosphatase 1 [Source:MGI Symbol;Acc:MGI:1913672]
ENSMUSG00000033863	Klf9	32.9482	40.1802	34.4303	27.9461	24.8057	28.5028	19	23141226	23166911	+	3263	protein_coding	Kruppel-like factor 9 [Source:MGI Symbol;Acc:MGI:1333856]
ENSMUSG00000025580	Eif4a3	28.3439	26.7173	29.6399	30.8373	39.9223	33.1513	11	119288363	119300089	-	2122	protein_coding	eukaryotic translation initiation factor 4A3 [Source:MGI Symbol;Acc:MGI:1923731]
ENSMUSG00000002233	Rhoc	34.848	31.1135	31.7937	28.7244	23.859	38.0463	3	104788375	104794459	+	1618	protein_coding	ras homolog family member C [Source:MGI Symbol;Acc:MGI:106028]
ENSMUSG00000054428	Atpif1	24.7111	36.0953	28.1306	32.2526	33.7361	33.0369	4	132530555	132533659	-	1441	protein_coding	ATPase inhibitory factor 1 [Source:MGI Symbol;Acc:MGI:1196457]
ENSMUSG00000025337	Sbds	28.218	34.3946	31.7703	31.3631	32.1051	30.034	5	130245731	130255530	-	2033	protein_coding	SBDS ribosome assembly guanine nucleotide exchange factor [Source:MGI Symbol;Acc:MGI:1913961]
ENSMUSG00000062345	Serpinb2	18.9989	27.7954	25.7792	39.5709	34.8418	40.8168	1	107511423	107535478	+	2349	protein_coding	serine (or cysteine) peptidase inhibitor, clade B, member 2 [Source:MGI Symbol;Acc:MGI:97609]
ENSMUSG00000034932	Mrpl54	31.5036	30.7417	31.6902	29.0759	32.1232	32.6638	10	81264713	81266934	-	825	protein_coding	mitochondrial ribosomal protein L54 [Source:MGI Symbol;Acc:MGI:1913297]
ENSMUSG00000036372	Tmem258	30.8865	31.1598	29.2425	31.0389	29.9724	35.497	19	10204014	10207824	+	1611	protein_coding	transmembrane protein 258 [Source:MGI Symbol;Acc:MGI:1916288]
ENSMUSG00000096842	Gm10736	25.7581	15.3085	40.8606	45.7908	17.8824	42.1841	13	111593534	111593611	-	78	processed_pseudogene	predicted gene 10736 [Source:MGI Symbol;Acc:MGI:3704412]
ENSMUSG00000019210	Atp6v1e1	32.3363	37.1292	34.8471	30.5982	26.0319	26.6115	6	120794305	120822793	-	4110	protein_coding	ATPase, H+ transporting, lysosomal V1 subunit E1 [Source:MGI Symbol;Acc:MGI:894326]
ENSMUSG00000024479	Mal2	28.2673	39.5697	33.5222	32.9401	26.7729	26.2959	15	54571366	54602846	+	2775	protein_coding	mal, T cell differentiation protein 2 [Source:MGI Symbol;Acc:MGI:2146021]
ENSMUSG00000024404	Riok3	31.4681	31.5851	29.2046	32.8092	31.7235	30.5351	18	12128850	12157367	+	3661	protein_coding	RIO kinase 3 [Source:MGI Symbol;Acc:MGI:1914128]
ENSMUSG00000059316	Slc27a4	30.2876	35.9518	37.1911	25.1557	33.0835	25.6396	2	29802634	29817522	+	4412	protein_coding	solute carrier family 27 (fatty acid transporter), member 4 [Source:MGI Symbol;Acc:MGI:1347347]
ENSMUSG00000022241	Tars	26.0118	29.8969	26.3352	31.4653	39.2656	34.3187	15	11383663	11399658	-	2636	protein_coding	threonyl-tRNA synthetase [Source:MGI Symbol;Acc:MGI:106314]
ENSMUSG00000051483	Cbr1	28.3025	30.7734	28.422	33.8999	32.501	33.2662	16	93607837	93610505	+	1237	protein_coding	carbonyl reductase 1 [Source:MGI Symbol;Acc:MGI:88284]
ENSMUSG00000003477	Inmt	36.3087	43.8818	38.1895	16.508	10.1535	41.6241	6	55170626	55175043	-	1600	protein_coding	indolethylamine N-methyltransferase [Source:MGI Symbol;Acc:MGI:102963]
ENSMUSG00000071654	Uqcc3	33.6205	33.3012	33.5797	26.2761	27.0691	32.7574	19	8880016	8880933	-	829	protein_coding	ubiquinol-cytochrome c reductase complex assembly factor 3 [Source:MGI Symbol;Acc:MGI:2147553]
ENSMUSG00000045502	Hcar2	24.674	36.4529	30.0599	32.6485	35.9653	26.7813	5	123863570	123865499	-	1930	protein_coding	hydroxycarboxylic acid receptor 2 [Source:MGI Symbol;Acc:MGI:1933383]
ENSMUSG00000040728	Esrp1	22.8891	29.9529	30.6454	35.0941	42.6965	25.1222	4	11331933	11386783	-	6305	protein_coding	epithelial splicing regulatory protein 1 [Source:MGI Symbol;Acc:MGI:1917326]
ENSMUSG00000005973	Rcn1	21.4808	26.0332	23.4659	37.4034	41.8843	36.0855	2	105386291	105399319	-	3196	protein_coding	reticulocalbin 1 [Source:MGI Symbol;Acc:MGI:104559]
ENSMUSG00000031503	Col4a2	26.9053	22.5499	25.016	39.1051	33.6983	39.0765	8	11312805	11449287	+	6619	protein_coding	collagen, type IV, alpha 2 [Source:MGI Symbol;Acc:MGI:88455]
ENSMUSG00000001508	Sgca	47.5274	35.4021	38.3752	22.3143	16.7644	25.9263	11	94962791	94976327	-	1735	protein_coding	sarcoglycan, alpha (dystrophin-associated glycoprotein) [Source:MGI Symbol;Acc:MGI:894698]
ENSMUSG00000059714	Flot1	33.2908	28.8919	30.5368	35.7423	26.7161	30.8813	17	35823230	35832791	+	2893	protein_coding	flotillin 1 [Source:MGI Symbol;Acc:MGI:1100500]
ENSMUSG00000031865	Dctn1	34.4134	31.575	35.3924	27.572	26.8936	30.1898	6	83165920	83200117	+	6509	protein_coding	dynactin 1 [Source:MGI Symbol;Acc:MGI:107745]
ENSMUSG00000029247	Paics	29.1702	33.9009	29.8888	30.7077	31.7974	30.5178	5	76951307	76967509	+	3139	protein_coding	phosphoribosylaminoimidazole carboxylase, phosphoribosylaminoribosylaminoimidazole, succinocarboxamide synthetase [Source:MGI Symbol;Acc:MGI:1914304]
ENSMUSG00000030579	Tyrobp	17.6886	16.8995	12.991	42.5083	38.0105	57.7607	7	30413760	30417585	+	667	protein_coding	TYRO protein tyrosine kinase binding protein [Source:MGI Symbol;Acc:MGI:1277211]
ENSMUSG00000029535	Triap1	34.143	34.6805	33.7332	29.302	28.8075	25.1126	5	115341225	115343569	+	1088	protein_coding	TP53 regulated inhibitor of apoptosis 1 [Source:MGI Symbol;Acc:MGI:1916326]
ENSMUSG00000055044	Pdlim1	32.3613	25.3523	28.5254	31.0508	32.5074	35.9411	19	40221173	40271842	-	5260	protein_coding	PDZ and LIM domain 1 (elfin) [Source:MGI Symbol;Acc:MGI:1860611]
ENSMUSG00000006740	Kif5b	30.4869	30.227	29.1453	32.6403	34.0232	29.2086	18	6201002	6242174	-	7395	protein_coding	kinesin family member 5B [Source:MGI Symbol;Acc:MGI:1098268]
ENSMUSG00000029621	Arpc1a	29.7251	35.2404	33.6971	30.6105	28.5747	27.81	5	145083830	145108761	+	2567	protein_coding	actin related protein 2/3 complex, subunit 1A [Source:MGI Symbol;Acc:MGI:1928896]
ENSMUSG00000024067	Dpy30	30.8098	34.032	31.5461	28.6571	29.9047	30.7031	17	74299474	74323944	-	974	protein_coding	dpy-30, histone methyltransferase complex regulatory subunit [Source:MGI Symbol;Acc:MGI:1913560]
ENSMUSG00000036275	9530068E07Rik	32.9296	31.5325	32.2725	29.1915	30.1459	29.4685	11	52396428	52408728	+	3296	protein_coding	RIKEN cDNA 9530068E07 gene [Source:MGI Symbol;Acc:MGI:2654705]
ENSMUSG00000078238	Gm12854	16.5521	18.1723	22.8035	35.6322	44.2012	48.101	4	116067268	116067564	+	297	processed_pseudogene	predicted gene 12854 [Source:MGI Symbol;Acc:MGI:3650410]
ENSMUSG00000015568	Lpl	47.8146	31.8401	37.4656	28.7555	17.0354	22.3435	8	68880491	68907448	+	10478	protein_coding	lipoprotein lipase [Source:MGI Symbol;Acc:MGI:96820]
ENSMUSG00000015165	Hnrnpl	26.8635	27.921	28.3083	31.8656	39.8941	30.3998	7	28808541	28822266	+	5953	protein_coding	heterogeneous nuclear ribonucleoprotein L [Source:MGI Symbol;Acc:MGI:104816]
ENSMUSG00000074516	Gm10709	24.7579	27.6624	24.4844	29.6722	40.3405	38.2661	9	7751725	7752204	+	480	processed_pseudogene	predicted gene 10709 [Source:MGI Symbol;Acc:MGI:3642754]
ENSMUSG00000027593	Raly	32.4372	29.5106	31.389	28.5706	30.7931	32.3383	2	154791096	154867261	+	3292	protein_coding	hnRNP-associated with lethal yellow [Source:MGI Symbol;Acc:MGI:97850]
ENSMUSG00000041126	H2afv	34.7373	34.1035	34.5817	26.3003	25.951	29.3566	11	6427229	6444443	-	1633	protein_coding	H2A histone family, member V [Source:MGI Symbol;Acc:MGI:1924855]
ENSMUSG00000039221	Rpl22l1	27.1873	35.3956	30.2198	32.8772	30.9177	28.3321	3	28805436	28807424	+	1989	protein_coding	ribosomal protein L22 like 1 [Source:MGI Symbol;Acc:MGI:1915278]
ENSMUSG00000032279	Idh3a	38.8453	33.0533	32.7934	24.3078	24.71	30.8845	9	54586334	54604661	+	5072	protein_coding	isocitrate dehydrogenase 3 (NAD+) alpha [Source:MGI Symbol;Acc:MGI:1915084]
ENSMUSG00000090314	2310050C09Rik	24.2289	43.7306	33.307	31.9463	16.8207	34.4638	3	92868359	92870216	-	1078	protein_coding	RIKEN cDNA 2310050C09 gene [Source:MGI Symbol;Acc:MGI:1913783]
ENSMUSG00000031924	Cyb5b	30.5898	27.4083	27.7571	27.3804	40.1801	31.1662	8	107150640	107187471	+	4374	protein_coding	cytochrome b5 type B [Source:MGI Symbol;Acc:MGI:1913677]
ENSMUSG00000053329	D10Jhu81e	38.0617	34.6642	35.9844	23.836	23.0853	28.6293	10	78162066	78169782	-	2527	protein_coding	DNA segment, Chr 10, Johns Hopkins University 81 expressed [Source:MGI Symbol;Acc:MGI:1351861]
ENSMUSG00000067212	H2-T23	20.6709	35.7103	20.547	29.7782	31.8226	45.5715	17	36029773	36032855	-	2889	protein_coding	histocompatibility 2, T region locus 23 [Source:MGI Symbol;Acc:MGI:95957]
ENSMUSG00000082908	Gm13736	30.0753	26.2411	26.5725	27.0146	37.1326	37.0406	2	87526145	87526397	+	253	processed_pseudogene	predicted gene 13736 [Source:MGI Symbol;Acc:MGI:3650137]
ENSMUSG00000021282	Eif5	32.5057	30.0932	29.4996	31.7199	32.2419	27.8299	12	111538016	111546752	+	6820	protein_coding	eukaryotic translation initiation factor 5 [Source:MGI Symbol;Acc:MGI:95309]
ENSMUSG00000010095	Slc3a2	15.4686	16.1464	16.8489	35.7607	57.6595	41.8272	19	8706882	8723369	-	3529	protein_coding	solute carrier family 3 (activators of dibasic and neutral amino acid transport), member 2 [Source:MGI Symbol;Acc:MGI:96955]
ENSMUSG00000033128	Gga1	30.8137	31.3117	32.3512	26.1168	30.8696	32.178	15	78877190	78894585	+	3034	protein_coding	golgi associated, gamma adaptin ear containing, ARF binding protein 1 [Source:MGI Symbol;Acc:MGI:2146207]
ENSMUSG00000039481	Nrtn	28.0387	38.1913	36.4607	25.7328	24.0611	31.146	17	56751325	56757530	-	1023	protein_coding	neurturin [Source:MGI Symbol;Acc:MGI:108417]
ENSMUSG00000113061	AL607105.1	20.8456	25.1009	26.089	50.7781	30.6161	30.1912	13	28257528	28258134	+	607	protein_coding
ENSMUSG00000038781	Stap2	24.3125	34.052	30.1598	32.7385	34.3107	28.0461	17	55997081	56005570	-	1491	protein_coding	signal transducing adaptor family member 2 [Source:MGI Symbol;Acc:MGI:2147039]
ENSMUSG00000034681	Rnps1	28.9214	28.16	30.1387	30.8664	36.4731	29.0032	17	24414675	24425895	+	1920	protein_coding	ribonucleic acid binding protein S1 [Source:MGI Symbol;Acc:MGI:97960]
ENSMUSG00000018848	Rars	25.2539	31.2202	28.5248	34.7104	30.9334	32.8892	11	35808381	35834506	-	3228	protein_coding	arginyl-tRNA synthetase [Source:MGI Symbol;Acc:MGI:1914297]
ENSMUSG00000003541	Ier3	14.8917	21.0307	14.3981	30.6442	51.6884	50.8566	17	35821684	35822923	+	1131	protein_coding	immediate early response 3 [Source:MGI Symbol;Acc:MGI:104814]
ENSMUSG00000018559	Ctdnep1	37.1249	30.645	32.4537	25.8062	27.6566	29.7774	11	69981156	69990601	+	2182	protein_coding	CTD nuclear envelope phosphatase 1 [Source:MGI Symbol;Acc:MGI:1914431]
ENSMUSG00000014956	Ppp1cb	32.7667	32.1641	33.0562	29.4316	28.7128	27.2541	5	32458843	32517433	+	10913	protein_coding	protein phosphatase 1, catalytic subunit, beta isoform [Source:MGI Symbol;Acc:MGI:104871]
ENSMUSG00000005312	Ubqln1	32.764	30.1686	31.5227	28.1823	32.3278	28.3213	13	58176156	58215653	-	4406	protein_coding	ubiquilin 1 [Source:MGI Symbol;Acc:MGI:1860276]
ENSMUSG00000066315	Gm12918	17.4754	25.0077	25.9173	53.4546	28.1881	33.2022	4	10848420	10849055	+	636	processed_pseudogene	predicted gene 12918 [Source:MGI Symbol;Acc:MGI:3652005]
ENSMUSG00000027227	Sord	37.1496	32.4712	35.1048	25.5345	22.9192	30.0157	2	122234749	122265340	+	2352	protein_coding	sorbitol dehydrogenase [Source:MGI Symbol;Acc:MGI:98266]
ENSMUSG00000053560	Ier2	22.6938	26.0152	24.834	39.6332	39.7574	30.1567	8	84661331	84662852	-	1522	protein_coding	immediate early response 2 [Source:MGI Symbol;Acc:MGI:104815]
ENSMUSG00000021496	Pcbd2	28.8115	31.5792	28.5477	32.7885	30.2047	31.1232	13	55727368	55776830	+	546	protein_coding	pterin 4 alpha carbinolamine dehydratase/dimerization cofactor of hepatocyte nuclear factor 1 alpha (TCF1) 2 [Source:MGI Symbol;Acc:MGI:1919812]
ENSMUSG00000030007	Cct7	32.1584	30.4629	31.6588	26.5233	31.8425	30.3497	6	85451514	85468475	+	6778	protein_coding	chaperonin containing Tcp1, subunit 7 (eta) [Source:MGI Symbol;Acc:MGI:107184]
ENSMUSG00000028394	Pole3	28.8755	35.7282	33.2236	29.5911	29.8029	25.7455	4	62522649	62525068	-	2040	protein_coding	polymerase (DNA directed), epsilon 3 (p17 subunit) [Source:MGI Symbol;Acc:MGI:1933378]
ENSMUSG00000022175	Lrp10	25.7543	28.537	29.7181	29.2216	35.1065	34.5118	14	54464164	54471497	+	4201	protein_coding	low-density lipoprotein receptor-related protein 10 [Source:MGI Symbol;Acc:MGI:1929480]
ENSMUSG00000031782	Coq9	42.0619	31.6124	37.0353	21.9103	20.2503	29.7073	8	94838321	94854895	+	3055	protein_coding	coenzyme Q9 [Source:MGI Symbol;Acc:MGI:1915164]
ENSMUSG00000021248	Tmed10	28.9839	29.7786	30.7911	30.8839	32.1007	29.9743	12	85340614	85374847	-	5811	protein_coding	transmembrane p24 trafficking protein 10 [Source:MGI Symbol;Acc:MGI:1915831]
ENSMUSG00000030246	Ldhb	53.3119	32.4298	34.3834	20.9802	14.3454	26.8736	6	142490249	142507957	-	1570	protein_coding	lactate dehydrogenase B [Source:MGI Symbol;Acc:MGI:96763]
ENSMUSG00000041731	Pgm5	51.0816	40.3289	41.9794	17.9994	11.1564	19.7582	19	24683016	24861855	-	3611	protein_coding	phosphoglucomutase 5 [Source:MGI Symbol;Acc:MGI:1925668]
ENSMUSG00000035212	Leprot	27.6125	30.0969	27.0771	34.0818	30.9735	32.4116	4	101647718	101659364	+	1898	protein_coding	leptin receptor overlapping transcript [Source:MGI Symbol;Acc:MGI:2687005]
ENSMUSG00000068739	Sars	26.3202	30.5041	29.1026	29.5081	36.2533	30.5127	3	108424865	108445209	-	5142	protein_coding	seryl-aminoacyl-tRNA synthetase [Source:MGI Symbol;Acc:MGI:102809]
ENSMUSG00000046731	Kctd11	25.0833	33.9924	30.6296	28.4388	34.3738	29.5099	11	69878261	69881406	-	3146	protein_coding	potassium channel tetramerisation domain containing 11 [Source:MGI Symbol;Acc:MGI:2448712]
ENSMUSG00000029404	Arl6ip4	28.9035	31.5325	31.0466	25.35	34.2817	30.7899	5	124116089	124118196	+	1442	protein_coding	ADP-ribosylation factor-like 6 interacting protein 4 [Source:MGI Symbol;Acc:MGI:1929500]
ENSMUSG00000020777	Acox1	35.3538	32.274	33.9145	27.0799	24.6291	28.4224	11	116171888	116199045	-	5082	protein_coding	acyl-Coenzyme A oxidase 1, palmitoyl [Source:MGI Symbol;Acc:MGI:1330812]
ENSMUSG00000049299	Trappc1	28.8315	31.7844	29.109	27.7576	31.9119	32.2114	11	69323980	69325793	+	1112	protein_coding	trafficking protein particle complex 1 [Source:MGI Symbol;Acc:MGI:1098727]
ENSMUSG00000031168	Ebp	26.3702	31.6556	31.9704	34.8941	30.0312	26.5587	X	8185329	8193512	-	2310	protein_coding	phenylalkylamine Ca2+ antagonist (emopamil) binding protein [Source:MGI Symbol;Acc:MGI:107822]
ENSMUSG00000053617	Sh3pxd2a	26.901	27.5237	26.5556	30.6608	40.2127	29.6136	19	47260174	47464411	-	10464	protein_coding	SH3 and PX domains 2A [Source:MGI Symbol;Acc:MGI:1298393]
ENSMUSG00000026021	Sumo1	31.2988	32.0717	27.1543	30.1825	28.6537	32.1003	1	59586558	59670834	-	2076	protein_coding	small ubiquitin-like modifier 1 [Source:MGI Symbol;Acc:MGI:1197010]
ENSMUSG00000022895	Ets2	28.5619	28.84	25.3752	30.6417	35.6153	32.2413	16	95702075	95721051	+	4710	protein_coding	E26 avian leukemia oncogene 2, 3' domain [Source:MGI Symbol;Acc:MGI:95456]
ENSMUSG00000030161	Gabarapl1	29.3478	33.3602	31.4922	29.2213	27.9405	29.4634	6	129533160	129542346	+	2013	protein_coding	gamma-aminobutyric acid (GABA) A receptor-associated protein-like 1 [Source:MGI Symbol;Acc:MGI:1914980]
ENSMUSG00000043284	Tmem11	33.0222	28.6575	30.7354	27.0381	30.7741	30.5753	11	60864452	60879272	-	1745	protein_coding	transmembrane protein 11 [Source:MGI Symbol;Acc:MGI:2144726]
ENSMUSG00000094345	Igkv14-126	1.19407	0.26683	0.97372	135.61	22.4602	20.2434	6	67896172	67896642	+	358	IG_V_gene	immunoglobulin kappa variable 14-126 [Source:MGI Symbol;Acc:MGI:3643131]
ENSMUSG00000063888	Rpl7l1	26.6885	27.8034	27.8422	29.1371	36.6164	32.652	17	46773907	46782656	-	2606	protein_coding	ribosomal protein L7-like 1 [Source:MGI Symbol;Acc:MGI:1913479]
ENSMUSG00000000631	Myo18a	36.5368	33.8718	35.316	24.0588	25.2178	25.722	11	77763246	77865980	+	16037	protein_coding	myosin XVIIIA [Source:MGI Symbol;Acc:MGI:2667185]
ENSMUSG00000025283	Sat1	20.8498	21.729	20.8064	39.9779	38.3771	38.9776	X	155213132	155216449	-	2774	protein_coding	spermidine/spermine N1-acetyl transferase 1 [Source:MGI Symbol;Acc:MGI:98233]
ENSMUSG00000032575	Manf	30.2532	25.1553	30.5095	35.6238	29.2548	29.8784	9	106838312	106891979	-	3524	protein_coding	mesencephalic astrocyte-derived neurotrophic factor [Source:MGI Symbol;Acc:MGI:1922090]
ENSMUSG00000081534	Slc48a1	25.9505	30.0779	27.1394	28.9157	36.2508	32.3292	15	97784355	97792692	+	2690	protein_coding	solute carrier family 48 (heme transporter), member 1 [Source:MGI Symbol;Acc:MGI:1914989]
ENSMUSG00000027177	Hipk3	38.7869	31.2157	32.4967	28.7359	25.7435	23.6123	2	104426481	104494446	-	7987	protein_coding	homeodomain interacting protein kinase 3 [Source:MGI Symbol;Acc:MGI:1314882]
ENSMUSG00000028042	Zbtb7b	23.1132	27.7041	26.6674	30.4902	40.3199	32.234	3	89377644	89394776	-	5591	protein_coding	zinc finger and BTB domain containing 7B [Source:MGI Symbol;Acc:MGI:102755]
ENSMUSG00000039217	Il18	35.4502	51.3759	33.9076	27.5005	12.5341	19.6333	9	50554827	50581840	+	1031	protein_coding	interleukin 18 [Source:MGI Symbol;Acc:MGI:107936]
ENSMUSG00000024392	Bag6	29.8373	28.2963	32.203	28.1455	31.8029	30.0699	17	35135178	35147322	+	6215	protein_coding	BCL2-associated athanogene 6 [Source:MGI Symbol;Acc:MGI:1919439]
ENSMUSG00000078695	Cisd3	32.3814	33.4853	29.2934	28.2673	31.1252	25.8001	11	97685826	97688621	+	833	protein_coding	CDGSH iron sulfur domain 3 [Source:MGI Symbol;Acc:MGI:101788]
ENSMUSG00000000594	Gm2a	22.0211	30.8078	27.898	34.4788	30.3482	34.737	11	55098115	55113029	+	4127	protein_coding	GM2 ganglioside activator protein [Source:MGI Symbol;Acc:MGI:95762]
ENSMUSG00000042903	Foxo4	40.6132	32.4949	37.4527	24.4451	21.6246	23.6515	X	101254528	101260873	+	3485	protein_coding	forkhead box O4 [Source:MGI Symbol;Acc:MGI:1891915]
ENSMUSG00000030403	Vasp	23.0644	22.9778	24.7377	27.4308	42.6075	39.4538	7	19256929	19271817	-	2617	protein_coding	vasodilator-stimulated phosphoprotein [Source:MGI Symbol;Acc:MGI:109268]
ENSMUSG00000100514	Gm12960	22.1758	26.3903	27.7023	38.1383	36.791	28.9129	4	111807358	111808423	-	1066	processed_pseudogene	predicted gene 12960 [Source:MGI Symbol;Acc:MGI:3651525]
ENSMUSG00000001288	Rarg	26.5807	33.965	31.1591	25.2722	35.0139	27.9661	15	102234938	102257517	-	4109	protein_coding	retinoic acid receptor, gamma [Source:MGI Symbol;Acc:MGI:97858]
ENSMUSG00000024181	Mrpl28	31.6412	30.1046	30.9972	25.0932	31.1385	30.927	17	26123520	26126613	+	1274	protein_coding	mitochondrial ribosomal protein L28 [Source:MGI Symbol;Acc:MGI:1915861]
ENSMUSG00000004936	Map2k1	29.801	34.1	32.1321	26.7872	29.3618	27.6235	9	64185770	64253631	-	3391	protein_coding	mitogen-activated protein kinase kinase 1 [Source:MGI Symbol;Acc:MGI:1346866]
ENSMUSG00000061259	Tmprss11d	9.75426	19.3886	14.017	45.9085	52.3514	38.3283	5	86302217	86373420	-	2796	protein_coding	transmembrane protease, serine 11d [Source:MGI Symbol;Acc:MGI:2385221]
ENSMUSG00000019866	Crybg1	26.5518	38.8828	36.0007	26.8378	27.2368	24.1986	10	43950636	44148853	-	7525	protein_coding	crystallin beta-gamma domain containing 1 [Source:MGI Symbol;Acc:MGI:109544]
ENSMUSG00000001383	Zmat2	30.285	30.6848	30.5368	29.4031	28.2099	30.1534	18	36793923	36799660	+	2257	protein_coding	zinc finger, matrin type 2 [Source:MGI Symbol;Acc:MGI:1913742]
ENSMUSG00000001783	Rtcb	26.9563	31.8173	29.0414	29.0706	30.8741	31.377	10	85938637	85957823	-	2615	protein_coding	RNA 2',3'-cyclic phosphate and 5'-OH ligase [Source:MGI Symbol;Acc:MGI:106379]
ENSMUSG00000007458	M6pr	25.9766	26.1033	25.2577	30.9299	37.1678	33.5299	6	122308720	122317680	+	4170	protein_coding	mannose-6-phosphate receptor, cation dependent [Source:MGI Symbol;Acc:MGI:96904]
ENSMUSG00000004032	Gstm5	40.2723	37.6718	33.9785	26.7053	15.1514	25.1596	3	107895821	107898686	+	1278	protein_coding	glutathione S-transferase, mu 5 [Source:MGI Symbol;Acc:MGI:1309466]
ENSMUSG00000023723	Mrps23	30.8001	31.5049	32.3054	26.8526	27.5862	29.6891	11	88204388	88211507	+	1560	protein_coding	mitochondrial ribosomal protein S23 [Source:MGI Symbol;Acc:MGI:1928138]
ENSMUSG00000044496	2510039O18Rik	21.9294	26.7232	25.4373	29.5957	40.0929	34.9245	4	147940895	147947314	+	2731	protein_coding	RIKEN cDNA 2510039O18 gene [Source:MGI Symbol;Acc:MGI:1924284]
ENSMUSG00000025190	Got1	40.5925	28.9698	38.7564	22.8203	19.1307	28.412	19	43499752	43524605	-	2539	protein_coding	glutamic-oxaloacetic transaminase 1, soluble [Source:MGI Symbol;Acc:MGI:95791]
ENSMUSG00000005355	Casp14	34.1052	34.2158	43.6832	23.4841	23.9737	19.0679	10	78711991	78718294	-	2394	protein_coding	caspase 14 [Source:MGI Symbol;Acc:MGI:1335092]
ENSMUSG00000025016	Tm9sf3	27.733	28.9887	28.1253	31.6717	31.1621	30.7902	19	41210842	41264004	-	6144	protein_coding	transmembrane 9 superfamily member 3 [Source:MGI Symbol;Acc:MGI:1914262]
ENSMUSG00000024038	Ndufv3	37.271	35.5437	32.2992	23.6058	21.9126	27.6831	17	31520115	31531326	+	2490	protein_coding	NADH dehydrogenase (ubiquinone) flavoprotein 3 [Source:MGI Symbol;Acc:MGI:1890894]
ENSMUSG00000071650	Ganab	25.4028	23.5721	26.3178	33.2938	35.9148	33.7558	19	8898090	8916663	+	3862	protein_coding	alpha glucosidase 2 alpha neutral subunit [Source:MGI Symbol;Acc:MGI:1097667]
ENSMUSG00000062963	Ufc1	30.2124	29.6266	28.6524	30.7386	29.7475	29.2557	1	171288563	171295024	-	2070	protein_coding	ubiquitin-fold modifier conjugating enzyme 1 [Source:MGI Symbol;Acc:MGI:1913405]
ENSMUSG00000024856	Cdk2ap2	27.6448	26.2752	29.1609	29.8099	33.5516	31.4413	19	4097182	4099019	+	1636	protein_coding	CDK2-associated protein 2 [Source:MGI Symbol;Acc:MGI:1098779]
ENSMUSG00000005087	Cd44	18.7304	22.2812	19.7255	34.6785	48.907	33.3275	2	102811141	102901665	-	6776	protein_coding	CD44 antigen [Source:MGI Symbol;Acc:MGI:88338]
ENSMUSG00000022553	Maf1	32.7164	30.1189	31.7953	29.7622	25.7337	27.4387	15	76351294	76354380	+	2412	protein_coding	MAF1 homolog, negative regulator of RNA polymerase III [Source:MGI Symbol;Acc:MGI:1916127]
ENSMUSG00000029373	Pf4	34.3285	31.5325	24.6577	34.3708	25.3201	27.2083	5	90772435	90773383	+	721	protein_coding	platelet factor 4 [Source:MGI Symbol;Acc:MGI:1888711]
ENSMUSG00000006024	Napa	28.3967	31.501	30.95	27.7194	31.1529	27.6457	7	16098458	16117975	+	3786	protein_coding	N-ethylmaleimide sensitive fusion protein attachment protein alpha [Source:MGI Symbol;Acc:MGI:104563]
ENSMUSG00000028821	Syf2	26.9918	30.813	31.1273	30.152	28.1326	30.0705	4	134930898	134937548	+	2043	protein_coding	SYF2 homolog, RNA splicing factor (S. cerevisiae) [Source:MGI Symbol;Acc:MGI:1915842]
ENSMUSG00000054405	Dnajc8	28.7103	28.0967	27.326	29.7015	32.5143	30.8097	4	132535550	132553742	+	2555	protein_coding	DnaJ heat shock protein family (Hsp40) member C8 [Source:MGI Symbol;Acc:MGI:1915848]
ENSMUSG00000037062	Sh3glb1	37.6982	30.3833	31.3318	26.4676	23.141	28.0791	3	144683678	144720335	-	7467	protein_coding	SH3-domain GRB2-like B1 (endophilin) [Source:MGI Symbol;Acc:MGI:1859730]
ENSMUSG00000022043	Trim35	40.7296	31.9692	34.5831	24.0813	19.0552	26.6785	14	66297031	66311424	+	4618	protein_coding	tripartite motif-containing 35 [Source:MGI Symbol;Acc:MGI:1914104]
ENSMUSG00000003363	Pld3	21.6515	27.8016	27.1475	33.1616	35.2298	32.0923	7	27532000	27553218	-	2924	protein_coding	phospholipase D family, member 3 [Source:MGI Symbol;Acc:MGI:1333782]
ENSMUSG00000021973	Micu2	31.3121	33.5607	33.2477	27.595	24.2767	27.051	14	57916261	57999262	-	3084	protein_coding	mitochondrial calcium uptake 2 [Source:MGI Symbol;Acc:MGI:1915764]
ENSMUSG00000019877	Serinc1	32.4798	29.5849	29.6762	30.2756	27.1079	27.8449	10	57515774	57532530	-	5150	protein_coding	serine incorporator 1 [Source:MGI Symbol;Acc:MGI:1926228]
ENSMUSG00000030704	Rab6a	31.4414	29.1213	28.9335	30.2797	30.284	26.791	7	100607410	100641268	+	3728	protein_coding	RAB6A, member RAS oncogene family [Source:MGI Symbol;Acc:MGI:894313]
ENSMUSG00000020376	Rnf130	28.1508	28.2038	26.4017	33.7646	28.4379	31.7856	11	50025346	50104758	+	1558	protein_coding	ring finger protein 130 [Source:MGI Symbol;Acc:MGI:1891717]
ENSMUSG00000020850	Prpf8	27.5186	25.4272	28.3335	28.7051	35.4103	31.1999	11	75486816	75509449	+	7461	protein_coding	pre-mRNA processing factor 8 [Source:MGI Symbol;Acc:MGI:2179381]
ENSMUSG00000038020	Rapgefl1	22.2962	27.2676	31.2197	27.6748	43.3006	24.6218	11	98836785	98853697	+	5677	protein_coding	Rap guanine nucleotide exchange factor (GEF)-like 1 [Source:MGI Symbol;Acc:MGI:3611446]
ENSMUSG00000003068	Stk11	34.1047	28.6054	32.478	26.765	25.8148	28.4185	10	80115803	80130682	+	4580	protein_coding	serine/threonine kinase 11 [Source:MGI Symbol;Acc:MGI:1341870]
ENSMUSG00000020676	Ccl11	23.1121	21.63	20.6651	28.7717	38.1427	43.8443	11	82057823	82062955	+	1082	protein_coding	chemokine (C-C motif) ligand 11 [Source:MGI Symbol;Acc:MGI:103576]
ENSMUSG00000026170	Cyp27a1	40.6623	40.2014	37.9736	22.3011	15.0844	19.6271	1	74713574	74737892	+	2173	protein_coding	cytochrome P450, family 27, subfamily a, polypeptide 1 [Source:MGI Symbol;Acc:MGI:88594]
ENSMUSG00000024952	Rps6ka4	19.6948	26.2165	22.0015	26.7199	46.4959	34.6528	19	6829085	6840601	-	3119	protein_coding	ribosomal protein S6 kinase, polypeptide 4 [Source:MGI Symbol;Acc:MGI:1930076]
ENSMUSG00000020519	Sap30l	29.563	28.3421	28.2092	25.8593	30.8306	32.9293	11	57801637	57810217	+	1151	protein_coding	SAP30-like [Source:MGI Symbol;Acc:MGI:1354709]
ENSMUSG00000059923	Grb2	34.5674	29.5485	30.7912	25.9337	26.9978	27.881	11	115644045	115708597	-	2916	protein_coding	growth factor receptor bound protein 2 [Source:MGI Symbol;Acc:MGI:95805]
ENSMUSG00000024758	Rtn3	27.8411	31.1168	30.4436	29.42	28.089	28.799	19	7425901	7483289	-	5030	protein_coding	reticulon 3 [Source:MGI Symbol;Acc:MGI:1339970]
ENSMUSG00000030682	Cdipt	23.5177	26.2767	27.8197	29.6858	35.3739	32.9409	7	126975914	126980501	+	2592	protein_coding	CDP-diacylglycerol--inositol 3-phosphatidyltransferase (phosphatidylinositol synthase) [Source:MGI Symbol;Acc:MGI:105491]
ENSMUSG00000021756	Il6st	31.4704	26.8914	28.509	32.2637	24.0549	32.2987	13	112464070	112510086	+	11099	protein_coding	interleukin 6 signal transducer [Source:MGI Symbol;Acc:MGI:96560]
ENSMUSG00000001416	Cct3	28.1583	27.0004	27.2604	27.5645	34.2685	31.2213	3	88297116	88321767	+	6370	protein_coding	chaperonin containing Tcp1, subunit 3 (gamma) [Source:MGI Symbol;Acc:MGI:104708]
ENSMUSG00000006519	Cyba	23.0812	21.6517	17.686	37.0923	33.4827	42.4519	8	122424776	122432930	-	1039	protein_coding	cytochrome b-245, alpha polypeptide [Source:MGI Symbol;Acc:MGI:1316658]
ENSMUSG00000068566	Myadm	32.5473	25.9815	27.9785	28.6223	28.9642	31.2655	7	3289080	3300442	+	4480	protein_coding	myeloid-associated differentiation marker [Source:MGI Symbol;Acc:MGI:1355332]
ENSMUSG00000031068	Glrx3	32.3419	32.9748	28.2948	26.6802	25.1658	29.8758	7	137437614	137468594	+	5016	protein_coding	glutaredoxin 3 [Source:MGI Symbol;Acc:MGI:1353653]
ENSMUSG00000026073	Il1r2	22.5612	26.6348	25.9695	41.6452	40.6587	17.8126	1	40074079	40125231	+	1908	protein_coding	interleukin 1 receptor, type II [Source:MGI Symbol;Acc:MGI:96546]
ENSMUSG00000031007	Atp6ap2	29.8971	34.9188	31.4429	28.1109	25.9183	24.8501	X	12587801	12617049	+	2618	protein_coding	ATPase, H+ transporting, lysosomal accessory protein 2 [Source:MGI Symbol;Acc:MGI:1917745]
ENSMUSG00000036241	Ube2r2	33.2163	29.4625	33.3102	25.6948	25.5998	27.8397	4	41135743	41193380	+	4189	protein_coding	ubiquitin-conjugating enzyme E2R 2 [Source:MGI Symbol;Acc:MGI:1914865]
ENSMUSG00000027455	Nsfl1c	29.1377	28.8236	28.7093	27.4773	29.6177	31.3505	2	151494182	151511414	+	3967	protein_coding	NSFL1 (p97) cofactor (p47) [Source:MGI Symbol;Acc:MGI:3042273]
ENSMUSG00000025825	Iscu	31.6481	29.4565	29.98	26.5056	26.7713	30.7208	5	113772748	113778288	+	2176	protein_coding	iron-sulfur cluster assembly enzyme [Source:MGI Symbol;Acc:MGI:1913633]
ENSMUSG00000032601	Prkar2a	36.7087	33.3094	37.8293	21.8608	22.5769	22.7319	9	108689314	108750436	+	6378	protein_coding	protein kinase, cAMP dependent regulatory, type II alpha [Source:MGI Symbol;Acc:MGI:108025]
ENSMUSG00000038708	Golga4	37.9234	31.8381	35.3227	24.8192	20.4036	24.6741	9	118506267	118582519	+	13602	protein_coding	golgi autoantigen, golgin subfamily a, 4 [Source:MGI Symbol;Acc:MGI:1859646]
ENSMUSG00000026203	Dnajb2	38.9647	31.407	37.5864	21.8762	22.3707	22.7512	1	75236406	75245692	+	4249	protein_coding	DnaJ heat shock protein family (Hsp40) member B2 [Source:MGI Symbol;Acc:MGI:1928739]
ENSMUSG00000025381	Cnpy2	24.6658	28.9045	25.7866	29.2445	30.9568	35.3308	10	128322459	128327553	+	1740	protein_coding	canopy FGF signaling regulator 2 [Source:MGI Symbol;Acc:MGI:1928477]
ENSMUSG00000024960	Plcb3	25.0319	25.9675	28.1771	28.9697	36.1806	30.4668	19	6953714	6969759	-	4201	protein_coding	phospholipase C, beta 3 [Source:MGI Symbol;Acc:MGI:104778]
ENSMUSG00000025745	Hadha	34.2274	34.9055	33.7811	23.593	21.593	26.5406	5	30118304	30155162	-	8730	protein_coding	hydroxyacyl-Coenzyme A dehydrogenase/3-ketoacyl-Coenzyme A thiolase/enoyl-Coenzyme A hydratase (trifunctional protein), alpha subunit [Source:MGI Symbol;Acc:MGI:2135593]
ENSMUSG00000001440	Kpnb1	25.921	26.4179	26.0102	28.7185	36.7911	30.7604	11	97159714	97187881	-	6590	protein_coding	karyopherin (importin) beta 1 [Source:MGI Symbol;Acc:MGI:107532]
ENSMUSG00000055762	Eef1d	27.3868	31.029	29.2105	27.9061	30.0882	28.8592	15	75894796	75909556	-	5897	protein_coding	eukaryotic translation elongation factor 1 delta (guanine nucleotide exchange protein) [Source:MGI Symbol;Acc:MGI:1913906]
ENSMUSG00000040128	Pnrc1	30.6068	27.3124	32.8981	23.1524	30.6458	29.8012	4	33245423	33290163	-	2095	protein_coding	proline-rich nuclear receptor coactivator 1 [Source:MGI Symbol;Acc:MGI:1917838]
ENSMUSG00000038976	Ppp1r9b	22.5554	23.5101	22.6118	30.9783	36.4642	38.1841	11	94991035	95006899	+	5083	protein_coding	protein phosphatase 1, regulatory subunit 9B [Source:MGI Symbol;Acc:MGI:2387581]
ENSMUSG00000043131	Mob1a	24.031	28.7232	26.0732	31.2454	33.083	30.7989	6	83326016	83343776	+	4794	protein_coding	MOB kinase activator 1A [Source:MGI Symbol;Acc:MGI:2442631]
ENSMUSG00000024925	Rnaseh2c	27.5582	24.7511	22.9656	28.4268	31.5224	38.7017	19	5601873	5603439	+	1455	protein_coding	ribonuclease H2, subunit C [Source:MGI Symbol;Acc:MGI:1915459]
ENSMUSG00000079105	C7	38.1398	35.1034	42.0597	22.7392	7.66271	28.1511	15	4988762	5063773	-	2709	protein_coding	complement component 7 [Source:MGI Symbol;Acc:MGI:88235]
ENSMUSG00000013858	Tmem259	27.328	25.8735	29.1339	25.4943	33.0974	32.8431	10	79974948	79984330	-	4663	protein_coding	transmembrane protein 259 [Source:MGI Symbol;Acc:MGI:2177957]
ENSMUSG00000024750	Zfand5	37.6811	34.1117	35.1157	26.0027	20.3565	20.4989	19	21272278	21282289	+	6193	protein_coding	zinc finger, AN1-type domain 5 [Source:MGI Symbol;Acc:MGI:1278334]
ENSMUSG00000043782	Bicdl2	25.8318	45.3656	39.8286	21.2292	22.2385	19.0942	17	23660523	23668610	+	1913	protein_coding	BICD family like cargo adaptor 2 [Source:MGI Symbol;Acc:MGI:2388267]
ENSMUSG00000027204	Fbn1	34.2918	26.5277	24.7557	35.5799	27.7036	24.5684	2	125300594	125507993	-	12128	protein_coding	fibrillin 1 [Source:MGI Symbol;Acc:MGI:95489]
ENSMUSG00000090553	Snrpe	24.9568	25.2389	23.629	29.7608	35.4627	34.3644	1	133603871	133610291	-	1372	protein_coding	small nuclear ribonucleoprotein E [Source:MGI Symbol;Acc:MGI:98346]
ENSMUSG00000015290	Ubl4a	31.0607	29.977	29.9554	26.0471	27.1711	28.6593	X	74365718	74373218	-	3142	protein_coding	ubiquitin-like 4A [Source:MGI Symbol;Acc:MGI:95049]
ENSMUSG00000037577	Ephx3	20.9637	31.7271	31.1491	28.9384	33.9081	26.1687	17	32183770	32189549	-	2502	protein_coding	epoxide hydrolase 3 [Source:MGI Symbol;Acc:MGI:1919182]
ENSMUSG00000020827	Mink1	24.2299	29.4963	28.4406	27.6733	36.2992	26.7088	11	70562881	70614483	+	6286	protein_coding	misshapen-like kinase 1 (zebrafish) [Source:MGI Symbol;Acc:MGI:1355329]
ENSMUSG00000019539	Rcn3	29.378	28.5407	32.1068	32.3585	21.6948	28.5268	7	45082913	45092221	-	1717	protein_coding	reticulocalbin 3, EF-hand calcium binding domain [Source:MGI Symbol;Acc:MGI:1277122]
ENSMUSG00000028793	Rnf19b	18.5309	22.7504	21.2061	30.0005	40.6243	39.3588	4	129058271	129085886	+	2872	protein_coding	ring finger protein 19B [Source:MGI Symbol;Acc:MGI:1922484]
ENSMUSG00000024014	Pim1	19.2672	28.9146	27.58	32.1602	31.1648	33.3769	17	29490812	29496111	+	2638	protein_coding	proviral integration site 1 [Source:MGI Symbol;Acc:MGI:97584]
ENSMUSG00000021759	Plpp1	28.7508	30.0221	29.9362	30.0097	24.8959	28.7981	13	112800792	112867894	+	1750	protein_coding	phospholipid phosphatase 1 [Source:MGI Symbol;Acc:MGI:108412]
ENSMUSG00000022051	Bnip3l	22.0107	28.2441	25.0091	32.2456	33.6996	31.1594	14	66985239	67008877	-	3859	protein_coding	BCL2/adenovirus E1B interacting protein 3-like [Source:MGI Symbol;Acc:MGI:1332659]
ENSMUSG00000026750	Psmb7	28.69	29.794	27.1775	29.0529	27.3535	30.2788	2	38588036	38644087	-	3421	protein_coding	proteasome (prosome, macropain) subunit, beta type 7 [Source:MGI Symbol;Acc:MGI:107637]
ENSMUSG00000042670	Immp1l	35.7647	34.1089	35.7196	25.2103	15.4646	25.8623	2	105904638	105965558	+	955	protein_coding	IMP1 inner mitochondrial membrane peptidase-like (S. cerevisiae) [Source:MGI Symbol;Acc:MGI:1913791]
ENSMUSG00000004849	Ap1s1	22.0545	27.4015	23.608	28.0458	38.1126	32.6493	5	137034993	137046135	-	2198	protein_coding	adaptor protein complex AP-1, sigma 1 [Source:MGI Symbol;Acc:MGI:1098244]
ENSMUSG00000024258	Polr2d	26.2477	26.9788	27.0351	28.7816	32.9996	29.7999	18	31789159	31796642	+	956	protein_coding	polymerase (RNA) II (DNA directed) polypeptide D [Source:MGI Symbol;Acc:MGI:1916491]
ENSMUSG00000017221	Psmd3	27.6004	26.5304	26.9998	26.686	34.6811	29.2146	11	98682554	98695979	+	4967	protein_coding	proteasome (prosome, macropain) 26S subunit, non-ATPase, 3 [Source:MGI Symbol;Acc:MGI:98858]
ENSMUSG00000022757	Tfg	29.6733	29.466	30.1139	27.415	29.1394	25.786	16	56690332	56717450	-	2292	protein_coding	Trk-fused gene [Source:MGI Symbol;Acc:MGI:1338041]
ENSMUSG00000045948	Mrps12	32.0606	29.7597	31.1721	23.9554	27.2969	27.3129	7	28739641	28741820	-	1040	protein_coding	mitochondrial ribosomal protein S12 [Source:MGI Symbol;Acc:MGI:1346333]
ENSMUSG00000042745	Id1	26.6067	22.8519	19.9625	36.3022	36.2499	29.5501	2	152736251	152737410	+	1160	protein_coding	inhibitor of DNA binding 1 [Source:MGI Symbol;Acc:MGI:96396]
ENSMUSG00000023959	Clic5	44.1093	32.5143	36.3777	21.0183	17.1435	20.2716	17	44188572	44280168	+	5870	protein_coding	chloride intracellular channel 5 [Source:MGI Symbol;Acc:MGI:1917912]
ENSMUSG00000030605	Mfge8	20.2627	20.1571	20.1784	35.4713	35.4658	39.8755	7	79133768	79149060	-	4694	protein_coding	milk fat globule-EGF factor 8 protein [Source:MGI Symbol;Acc:MGI:102768]
ENSMUSG00000081272	Gm13509	18.6612	24.2829	25.9274	37.9931	33.8732	30.5052	2	49308155	49309462	+	1308	processed_pseudogene	predicted gene 13509 [Source:MGI Symbol;Acc:MGI:3649640]
ENSMUSG00000083327	Vcp-rs	33.4021	32.1394	24.6096	26.8858	26.838	27.2128	X	104345829	104348234	-	2406	processed_pseudogene	valosin containing protein, related sequence [Source:MGI Symbol;Acc:MGI:894298]
ENSMUSG00000006057	Atp5g1	33.2877	27.9652	28.2653	23.3042	25.6068	32.518	11	96068852	96075670	-	4912	protein_coding	ATP synthase, H+ transporting, mitochondrial F0 complex, subunit C1 (subunit 9) [Source:MGI Symbol;Acc:MGI:107653]
ENSMUSG00000022010	Tsc22d1	36.0792	29.6909	33.8969	27.3963	22.136	21.4641	14	76414961	76507765	+	8994	protein_coding	TSC22 domain family, member 1 [Source:MGI Symbol;Acc:MGI:109127]
ENSMUSG00000037242	Clic4	32.6135	26.89	29.9308	27.2943	23.8517	30.0335	4	135213969	135272814	-	6572	protein_coding	chloride intracellular channel 4 (mitochondrial) [Source:MGI Symbol;Acc:MGI:1352754]
ENSMUSG00000024854	Pold4	34.8087	29.2873	28.5112	23.1135	25.9219	28.9262	19	4231899	4233631	+	910	protein_coding	polymerase (DNA-directed), delta 4 [Source:MGI Symbol;Acc:MGI:1916995]
ENSMUSG00000033917	Gde1	27.513	28.6236	26.6065	28.7972	31.0834	27.7668	7	118688545	118705778	-	1692	protein_coding	glycerophosphodiester phosphodiesterase 1 [Source:MGI Symbol;Acc:MGI:1891827]
ENSMUSG00000046971	Pla2g4f	29.2947	31.7621	32.7587	27.1067	28.9334	20.4285	2	120299957	120314165	-	3203	protein_coding	phospholipase A2, group IVF [Source:MGI Symbol;Acc:MGI:2685493]
ENSMUSG00000024513	Mbd2	25.3506	24.5797	25.6431	30.3067	33.3912	30.9979	18	70568189	70626131	+	3214	protein_coding	methyl-CpG binding domain protein 2 [Source:MGI Symbol;Acc:MGI:1333813]
ENSMUSG00000000711	Rab5b	31.7783	30.0264	31.8044	26.3142	24.97	25.3609	10	128677175	128696264	-	4201	protein_coding	RAB5B, member RAS oncogene family [Source:MGI Symbol;Acc:MGI:105938]
ENSMUSG00000002014	Ssr4	21.498	26.7661	22.744	36.8312	30.3309	32.0448	X	73787028	73790830	+	3096	protein_coding	signal sequence receptor, delta [Source:MGI Symbol;Acc:MGI:1099464]
ENSMUSG00000023272	Creld2	29.6788	19.5042	29.2805	35.0431	26.3169	30.3826	15	88819646	88826681	+	1364	protein_coding	cysteine-rich with EGF-like domains 2 [Source:MGI Symbol;Acc:MGI:1923987]
ENSMUSG00000096544	Gm4617	24.5379	28.8595	26.1782	38.4998	29.4978	22.5238	3	124385667	124385997	+	331	processed_pseudogene	predicted pseudogene 4617 [Source:MGI Symbol;Acc:MGI:3704225]
ENSMUSG00000021456	Fbp2	37.4805	40.2844	29.2216	25.8146	18.7667	18.5143	13	62836877	62858422	-	1469	protein_coding	fructose bisphosphatase 2 [Source:MGI Symbol;Acc:MGI:95491]
ENSMUSG00000005566	Trim28	25.0337	24.961	26.2168	25.2289	37.8473	30.7818	7	12999114	13031035	+	4158	protein_coding	tripartite motif-containing 28 [Source:MGI Symbol;Acc:MGI:109274]
ENSMUSG00000034168	Irf2bpl	25.5463	26.0841	29.8453	24.8451	30.5029	33.2347	12	86880701	86884798	-	4098	protein_coding	interferon regulatory factor 2 binding protein-like [Source:MGI Symbol;Acc:MGI:2442463]
ENSMUSG00000002660	Clpp	27.3768	25.4047	28.427	28.0205	30.1819	30.6424	17	56990264	56996371	+	1207	protein_coding	caseinolytic mitochondrial matrix peptidase proteolytic subunit [Source:MGI Symbol;Acc:MGI:1858213]
ENSMUSG00000030805	Stx4a	29.728	28.6696	30.8399	26.4495	25.3191	28.9648	7	127824294	127849019	+	2364	protein_coding	syntaxin 4A (placental) [Source:MGI Symbol;Acc:MGI:893577]
ENSMUSG00000025579	Gaa	33.5063	29.4584	30.3083	24.4214	22.3862	29.7551	11	119267887	119285454	+	4783	protein_coding	glucosidase, alpha, acid [Source:MGI Symbol;Acc:MGI:95609]
ENSMUSG00000035585	Tsen34	24.9319	25.1124	25.3992	28.2166	33.5007	32.6186	7	3692863	3701024	+	2541	protein_coding	tRNA splicing endonuclease subunit 34 [Source:MGI Symbol;Acc:MGI:1913328]
ENSMUSG00000069662	Marcks	22.4298	23.4211	24.2228	26.568	39.5142	33.5526	10	37133375	37138920	-	4048	protein_coding	myristoylated alanine rich protein kinase C substrate [Source:MGI Symbol;Acc:MGI:96907]
ENSMUSG00000030753	Thap12	36.4572	30.2669	33.1509	24.9069	22.9835	21.8802	7	98703103	98718062	+	4125	protein_coding	THAP domain containing 12 [Source:MGI Symbol;Acc:MGI:1920231]
ENSMUSG00000013822	Elof1	25.4174	30.3356	27.0938	26.4777	32.3229	27.9707	9	22112989	22117172	-	1702	protein_coding	ELF1 homolog, elongation factor 1 [Source:MGI Symbol;Acc:MGI:1913376]
ENSMUSG00000028675	Pnrc2	25.4206	27.8201	26.5309	30.9441	30.1982	28.6451	4	135870918	135873850	-	2213	protein_coding	proline-rich nuclear receptor coactivator 2 [Source:MGI Symbol;Acc:MGI:106512]
ENSMUSG00000008690	Ncaph2	29.0924	29.0466	30.5578	27.0682	27.5971	26.1628	15	89355719	89372826	+	4198	protein_coding	non-SMC condensin II complex, subunit H2 [Source:MGI Symbol;Acc:MGI:1289164]
ENSMUSG00000032434	Cmtm6	24.3313	30.0598	26.3615	28.8027	28.717	31.2255	9	114731116	114749344	+	3440	protein_coding	CKLF-like MARVEL transmembrane domain containing 6 [Source:MGI Symbol;Acc:MGI:2447165]
ENSMUSG00000031983	2310022B05Rik	34.229	33.0163	34.1529	22.0008	21.8953	24.1941	8	124635756	124663369	-	3307	protein_coding	RIKEN cDNA 2310022B05 gene [Source:MGI Symbol;Acc:MGI:1916801]
ENSMUSG00000015759	Cnih1	30.3317	25.2502	28.5788	29.5183	29.6577	25.8921	14	46775582	46788411	-	1570	protein_coding	cornichon family AMPA receptor auxiliary protein 1 [Source:MGI Symbol;Acc:MGI:1277202]
ENSMUSG00000028779	Pef1	25.336	27.9841	29.0211	26.7102	32.5838	27.513	4	130102558	130128135	+	1915	protein_coding	penta-EF hand domain containing 1 [Source:MGI Symbol;Acc:MGI:1915148]
ENSMUSG00000026526	Fh1	35.2239	31.4286	32.4309	23.8414	18.9157	27.2715	1	175600374	175625635	-	3392	protein_coding	fumarate hydratase 1 [Source:MGI Symbol;Acc:MGI:95530]
ENSMUSG00000018362	Kpna2	18.2268	23.2911	22.5334	33.121	34.8128	36.9966	11	106988629	106999541	-	2873	protein_coding	karyopherin (importin) alpha 2 [Source:MGI Symbol;Acc:MGI:103561]
ENSMUSG00000029071	Dvl1	30.5547	24.56	27.4212	25.8691	30.7025	29.812	4	155847402	155859303	+	4996	protein_coding	dishevelled segment polarity protein 1 [Source:MGI Symbol;Acc:MGI:94941]
ENSMUSG00000000326	Comt	29.275	28.7292	28.597	28.6303	26.7176	26.8785	16	18406886	18426852	-	2532	protein_coding	catechol-O-methyltransferase [Source:MGI Symbol;Acc:MGI:88470]
ENSMUSG00000079139	Gm4204	25.7319	28.0522	30.9068	27.4026	31.1264	25.4773	1	135231995	135233225	+	1231	processed_pseudogene	predicted gene 4204 [Source:MGI Symbol;Acc:MGI:3782381]
ENSMUSG00000047126	Cltc	26.8637	26.7726	25.916	30.8078	31.2931	27.0366	11	86694351	86757565	-	8499	protein_coding	clathrin, heavy polypeptide (Hc) [Source:MGI Symbol;Acc:MGI:2388633]
ENSMUSG00000017760	Ctsa	24.479	24.9601	25.7496	32.2832	28.9389	32.2513	2	164832873	164841032	+	4715	protein_coding	cathepsin A [Source:MGI Symbol;Acc:MGI:97748]
ENSMUSG00000064317	Gm10146	19.9212	27.3591	25.6246	26.6852	34.9171	34.1019	10	78393320	78393628	+	309	processed_pseudogene	predicted gene 10146 [Source:MGI Symbol;Acc:MGI:3704367]
ENSMUSG00000006728	Cdk4	21.8277	24.7559	22.8072	26.0036	40.3803	32.7663	10	127063534	127067920	+	3249	protein_coding	cyclin-dependent kinase 4 [Source:MGI Symbol;Acc:MGI:88357]
ENSMUSG00000030105	Arl8b	30.2163	31.2018	30.92	26.9058	25.7283	23.359	6	108783099	108825278	+	4479	protein_coding	ADP-ribosylation factor-like 8B [Source:MGI Symbol;Acc:MGI:1914416]
ENSMUSG00000015671	Psma2	27.1871	28.413	24.7706	26.4113	31.8097	29.6983	13	14613240	14674236	+	3673	protein_coding	proteasome (prosome, macropain) subunit, alpha type 2 [Source:MGI Symbol;Acc:MGI:104885]
ENSMUSG00000032097	Ddx6	27.2605	28.812	28.0572	28.5752	30.1491	25.3892	9	44604892	44640731	+	8035	protein_coding	DEAD (Asp-Glu-Ala-Asp) box polypeptide 6 [Source:MGI Symbol;Acc:MGI:104976]
ENSMUSG00000051431	Gpr87	23.1629	38.5457	29.9748	24.9636	28.101	23.4731	3	59178923	59195104	-	1565	protein_coding	G protein-coupled receptor 87 [Source:MGI Symbol;Acc:MGI:1934133]
ENSMUSG00000005354	Txn2	28.5254	26.7415	29.2189	24.7091	28.6136	30.3963	15	77915047	77929006	-	4208	protein_coding	thioredoxin 2 [Source:MGI Symbol;Acc:MGI:1929468]
ENSMUSG00000059195	Gm12715	14.9313	17.0217	22.0739	53.0859	30.8773	30.1668	4	103563402	103564529	+	1128	processed_pseudogene	predicted gene 12715 [Source:MGI Symbol;Acc:MGI:3650759]
ENSMUSG00000021607	Mrpl36	24.5218	26.8638	26.0361	25.1428	35.724	29.5246	13	73328513	73332178	+	1161	protein_coding	mitochondrial ribosomal protein L36 [Source:MGI Symbol;Acc:MGI:2137228]
ENSMUSG00000049327	Kmt5a	27.2176	27.0537	29.2018	25.8155	33.008	25.5065	5	124439930	124462308	+	5307	protein_coding	lysine methyltransferase 5A [Source:MGI Symbol;Acc:MGI:1915206]
ENSMUSG00000000753	Serpinf1	31.1682	36.1812	30.1875	24.2251	20.1035	25.8128	11	75409769	75422701	-	2359	protein_coding	serine (or cysteine) peptidase inhibitor, clade F, member 1 [Source:MGI Symbol;Acc:MGI:108080]
ENSMUSG00000004667	Polr2e	27.954	29.1584	27.5292	24.0788	27.6875	31.1362	10	80035949	80039795	-	2670	protein_coding	polymerase (RNA) II (DNA directed) polypeptide E [Source:MGI Symbol;Acc:MGI:1913670]
ENSMUSG00000091896	Ube2d2a	26.0135	27.7765	26.7947	24.9687	32.6806	29.2373	18	35771559	35807172	+	2483	protein_coding	ubiquitin-conjugating enzyme E2D 2A [Source:MGI Symbol;Acc:MGI:1930715]
ENSMUSG00000002778	Kdelr1	26.6203	25.9712	27.1847	28.1417	29.9911	29.4929	7	45872772	45883732	+	1874	protein_coding	KDEL (Lys-Asp-Glu-Leu) endoplasmic reticulum protein retention receptor 1 [Source:MGI Symbol;Acc:MGI:1915387]
ENSMUSG00000027868	Tbx15	50.6536	33.4733	37.3458	15.4397	12.7989	17.6516	3	99240381	99354259	+	3747	protein_coding	T-box 15 [Source:MGI Symbol;Acc:MGI:1277234]
ENSMUSG00000053746	Ptrh1	24.8199	43.5964	36.68	25.2526	20.0965	16.9169	2	32775786	32777597	+	1135	protein_coding	peptidyl-tRNA hydrolase 1 homolog [Source:MGI Symbol;Acc:MGI:1913779]
ENSMUSG00000025487	Psmd13	26.4308	26.9857	26.4404	27.1072	30.5161	29.7237	7	140881968	140898643	+	3377	protein_coding	proteasome (prosome, macropain) 26S subunit, non-ATPase, 13 [Source:MGI Symbol;Acc:MGI:1345192]
ENSMUSG00000028955	Vamp3	28.1136	28.1053	25.3217	28.9692	29.7635	26.7287	4	151047300	151057963	-	2889	protein_coding	vesicle-associated membrane protein 3 [Source:MGI Symbol;Acc:MGI:1321389]
ENSMUSG00000029622	Arpc1b	16.7313	17.8537	15.626	35.7759	40.7997	40.2089	5	145114215	145130705	+	5115	protein_coding	actin related protein 2/3 complex, subunit 1B [Source:MGI Symbol;Acc:MGI:1343142]
ENSMUSG00000071649	B3gat3	29.3973	26.4916	26.8746	24.898	28.5197	30.6197	19	8920374	8927234	+	1601	protein_coding	beta-1,3-glucuronyltransferase 3 (glucuronosyltransferase I) [Source:MGI Symbol;Acc:MGI:1919977]
ENSMUSG00000039159	Ube2h	29.5566	29.8566	30.1085	26.4477	26.374	24.4499	6	30211289	30304539	-	4780	protein_coding	ubiquitin-conjugating enzyme E2H [Source:MGI Symbol;Acc:MGI:104632]
ENSMUSG00000024858	Grk2	30.2461	32.5779	32.6652	22.8553	23.1701	25.1055	19	4286001	4306222	-	4476	protein_coding	G protein-coupled receptor kinase 2 [Source:MGI Symbol;Acc:MGI:87940]
ENSMUSG00000058835	Abi1	24.6392	27.6482	27.0485	30.6433	29.9033	26.6201	2	22940073	23040241	-	4032	protein_coding	abl-interactor 1 [Source:MGI Symbol;Acc:MGI:104913]
ENSMUSG00000015461	Atf6b	21.5056	20.8235	25.3058	27.3654	39.2535	32.2384	17	34647146	34655074	+	2757	protein_coding	activating transcription factor 6 beta [Source:MGI Symbol;Acc:MGI:105121]
ENSMUSG00000038762	Abcf1	27.655	25.4517	28.0499	24.8771	29.6286	30.8079	17	35956819	35969761	-	4410	protein_coding	ATP-binding cassette, sub-family F (GCN20), member 1 [Source:MGI Symbol;Acc:MGI:1351658]
ENSMUSG00000045954	Cavin2	33.0926	32.4253	29.7815	30.7293	15.4563	24.9628	1	51289126	51302960	+	3055	protein_coding	caveolae associated 2 [Source:MGI Symbol;Acc:MGI:99513]
ENSMUSG00000039630	Hnrnpu	26.6089	24.2374	25.9878	29.5613	31.8956	28.0265	1	178321108	178337797	-	11599	protein_coding	heterogeneous nuclear ribonucleoprotein U [Source:MGI Symbol;Acc:MGI:1858195]
ENSMUSG00000062248	Cks2	19.0881	23.191	28.0658	28.1646	34.7995	32.9831	13	51645232	51650660	+	692	protein_coding	CDC28 protein kinase regulatory subunit 2 [Source:MGI Symbol;Acc:MGI:1913447]
ENSMUSG00000085438	1700020I14Rik	37.6164	30.2871	31.2427	24.1391	19.6132	23.3574	2	119594297	119607502	+	8306	lincRNA	RIKEN cDNA 1700020I14 gene [Source:MGI Symbol;Acc:MGI:1913852]
ENSMUSG00000061111	Mcrip1	27.109	28.0167	26.8805	27.138	28.0962	28.9797	11	120542888	120549727	-	1282	protein_coding	MAPK regulated corepressor interacting protein 1 [Source:MGI Symbol;Acc:MGI:2384752]
ENSMUSG00000020738	Sumo2	33.1195	15.3247	14.4003	40.996	9.68891	52.6625	11	115523102	115536276	-	1736	protein_coding	small ubiquitin-like modifier 2 [Source:MGI Symbol;Acc:MGI:2158813]
ENSMUSG00000071172	Srsf3	24.2897	27.9993	25.8498	29.854	29.5657	28.1581	17	29032673	29043366	+	5109	protein_coding	serine/arginine-rich splicing factor 3 [Source:MGI Symbol;Acc:MGI:98285]
ENSMUSG00000017774	Myo1c	26.6807	27.8741	28.0719	27.3743	26.8449	28.8357	11	75650504	75673910	+	6585	protein_coding	myosin IC [Source:MGI Symbol;Acc:MGI:106612]
ENSMUSG00000025888	Casp1	17.6187	24.8863	18.9947	32.7545	33.7347	37.5324	9	5298517	5307265	+	1497	protein_coding	caspase 1 [Source:MGI Symbol;Acc:MGI:96544]
ENSMUSG00000022451	Twf1	19.6801	23.287	20.7414	33.5693	41.7899	26.403	15	94577951	94589889	-	3054	protein_coding	twinfilin actin binding protein 1 [Source:MGI Symbol;Acc:MGI:1100520]
ENSMUSG00000026965	Anapc2	25.9463	28.7545	28.2314	27.6217	28.8063	26.0177	2	25272478	25285915	+	3445	protein_coding	anaphase promoting complex subunit 2 [Source:MGI Symbol;Acc:MGI:2139135]
ENSMUSG00000031021	Tmem9b	25.324	30.8953	29.4017	27.3115	27.4178	25.0067	7	109735834	109752875	-	2002	protein_coding	TMEM9 domain family, member B [Source:MGI Symbol;Acc:MGI:1915254]
ENSMUSG00000001467	Cyp51	21.9499	36.0788	24.42	21.8727	35.1517	25.8108	5	4081145	4104746	-	4415	protein_coding	cytochrome P450, family 51 [Source:MGI Symbol;Acc:MGI:106040]
ENSMUSG00000027984	Hadh	32.9131	34.8262	33.2392	21.7063	20.5822	21.959	3	131233419	131272101	-	4977	protein_coding	hydroxyacyl-Coenzyme A dehydrogenase [Source:MGI Symbol;Acc:MGI:96009]
ENSMUSG00000055093	Gm8430	20.1485	23.3235	21.146	50.5546	25.2591	24.7602	6	122456904	122457374	+	471	processed_pseudogene	predicted pseudogene 8430 [Source:MGI Symbol;Acc:MGI:3645406]
ENSMUSG00000018583	G3bp1	29.5432	26.5588	28.2762	25.9238	27.4115	27.4464	11	55469685	55504838	+	7064	protein_coding	GTPase activating protein (SH3 domain) binding protein 1 [Source:MGI Symbol;Acc:MGI:1351465]
ENSMUSG00000053907	Mat2a	32.1131	26.5004	24.9105	25.0651	27.7732	28.7169	6	72432799	72439558	-	4486	protein_coding	methionine adenosyltransferase II, alpha [Source:MGI Symbol;Acc:MGI:2443731]
ENSMUSG00000056214	Pard6g	18.5652	23.5241	22.4198	28.2415	44.5876	27.7226	18	80046895	80119640	+	3143	protein_coding	par-6 family cell polarity regulator gamma [Source:MGI Symbol;Acc:MGI:2135606]
ENSMUSG00000019471	Cdc37	25.589	32.5431	29.9255	23.7479	26.8004	26.3198	9	21133222	21149982	-	8194	protein_coding	cell division cycle 37 [Source:MGI Symbol;Acc:MGI:109531]
ENSMUSG00000020133	2310011J03Rik	23.7976	25.286	25.5487	26.0986	33.7101	30.2589	10	80318254	80320537	-	1649	protein_coding	RIKEN cDNA 2310011J03 gene [Source:MGI Symbol;Acc:MGI:1913624]
ENSMUSG00000035342	Lzts2	30.1911	31.5092	33.6709	22.8249	20.9686	25.3808	19	45015176	45027104	+	2921	protein_coding	leucine zipper, putative tumor suppressor 2 [Source:MGI Symbol;Acc:MGI:2385095]
ENSMUSG00000001964	Emd	26.766	28.9004	29.7566	24.8242	27.9852	26.2444	X	74254687	74261548	+	2517	protein_coding	emerin [Source:MGI Symbol;Acc:MGI:108117]
ENSMUSG00000025204	Ndufb8	33.3855	29.3771	30.962	20.5337	21.6205	28.5964	19	44548572	44555440	-	3146	protein_coding	NADH dehydrogenase (ubiquinone) 1 beta subcomplex 8 [Source:MGI Symbol;Acc:MGI:1914514]
ENSMUSG00000019158	Tmem160	36.2604	29.8583	26.7323	22.7216	22.8584	25.9429	7	16452779	16455494	+	883	protein_coding	transmembrane protein 160 [Source:MGI Symbol;Acc:MGI:1916344]
ENSMUSG00000021477	Ctsl	26.0938	27.3517	25.31	31.5371	26.7995	27.2597	13	64359337	64370890	-	6489	protein_coding	cathepsin L [Source:MGI Symbol;Acc:MGI:88564]
ENSMUSG00000002365	Snx9	27.0031	28.9626	30.0115	25.4218	24.6043	28.3484	17	5841328	5931033	+	2411	protein_coding	sorting nexin 9 [Source:MGI Symbol;Acc:MGI:1913866]
ENSMUSG00000031844	Hsd17b2	28.839	43.1451	35.4855	23.2163	13.9235	19.6777	8	117701904	117759027	+	1924	protein_coding	hydroxysteroid (17-beta) dehydrogenase 2 [Source:MGI Symbol;Acc:MGI:1096386]
ENSMUSG00000024335	Brd2	22.0691	24.8876	24.3901	28.3636	36.3784	28.1632	17	34112023	34122634	-	7285	protein_coding	bromodomain containing 2 [Source:MGI Symbol;Acc:MGI:99495]
ENSMUSG00000037351	Actr1b	28.8451	25.334	27.0783	24.2656	27.8934	30.804	1	36698114	36714422	-	4274	protein_coding	ARP1 actin-related protein 1B, centractin beta [Source:MGI Symbol;Acc:MGI:1917446]
ENSMUSG00000019689	Fmc1	30.5871	31.9572	28.4771	24.1274	22.2686	26.7794	6	38533502	38539449	+	689	protein_coding	formation of mitochondrial complex V assembly factor 1 [Source:MGI Symbol;Acc:MGI:1913367]
ENSMUSG00000078572	Ndufaf8	30.5998	29.8372	28.6612	22.6819	23.7587	28.416	11	120098928	120100705	+	834	protein_coding	NADH dehydrogenase (ubiquinone) 1 alpha subcomplex assembly factor 8 [Source:MGI Symbol;Acc:MGI:1913676]
ENSMUSG00000041084	Ostc	22.8733	22.9003	22.3923	34.7502	27.7074	33.2474	3	130695912	130709444	-	2751	protein_coding	oligosaccharyltransferase complex subunit (non-catalytic) [Source:MGI Symbol;Acc:MGI:1913607]
ENSMUSG00000044951	Mylk4	57.0782	33.8887	38.3518	10.8202	8.63245	15.0923	13	32700834	32783954	-	6121	protein_coding	myosin light chain kinase family, member 4 [Source:MGI Symbol;Acc:MGI:3643758]
ENSMUSG00000029394	Cdk2ap1	32.3384	26.4096	28.4702	21.2623	27.9352	27.1588	5	124345417	124363082	-	2078	protein_coding	CDK2 (cyclin-dependent kinase 2)-associated protein 1 [Source:MGI Symbol;Acc:MGI:1202069]
ENSMUSG00000039616	Mocos	27.0655	38.8857	34.1201	21.7264	23.0157	18.731	18	24653691	24701556	+	2884	protein_coding	molybdenum cofactor sulfurase [Source:MGI Symbol;Acc:MGI:1915841]
ENSMUSG00000054717	Hmgb2	20.8969	28.438	29.1861	28.8239	29.5899	26.5462	8	57511907	57515999	+	3003	protein_coding	high mobility group box 2 [Source:MGI Symbol;Acc:MGI:96157]
ENSMUSG00000046718	Bst2	13.8705	29.9904	13.015	24.1716	37.9349	44.4637	8	71534255	71537456	-	903	protein_coding	bone marrow stromal cell antigen 2 [Source:MGI Symbol;Acc:MGI:1916800]
ENSMUSG00000035048	Anapc13	31.094	31.4666	30.5036	23.7077	21.8842	24.7413	9	102626296	102634425	+	2377	protein_coding	anaphase promoting complex subunit 13 [Source:MGI Symbol;Acc:MGI:1916260]
ENSMUSG00000001018	Snapin	34.422	30.1383	30.7056	24.3966	20.96	22.7712	3	90488026	90491033	-	2290	protein_coding	SNAP-associated protein [Source:MGI Symbol;Acc:MGI:1333745]
ENSMUSG00000037379	Spon2	26.4289	21.8797	20.9537	32.3791	35.3725	26.344	5	33198184	33218455	-	2947	protein_coding	spondin 2, extracellular matrix protein [Source:MGI Symbol;Acc:MGI:1923724]
ENSMUSG00000028820	Sfpq	24.5237	25.1551	28.5165	26.0311	30.8525	28.0917	4	127021324	127037013	+	4743	protein_coding	splicing factor proline/glutamine rich (polypyrimidine tract binding protein associated) [Source:MGI Symbol;Acc:MGI:1918764]
ENSMUSG00000032026	Rexo2	22.6682	22.1528	21.9792	32.7878	33.7162	29.7888	9	48468512	48480623	-	3385	protein_coding	RNA exonuclease 2 [Source:MGI Symbol;Acc:MGI:1888981]
ENSMUSG00000039745	Htatip2	22.9367	30.7483	23.5708	28.3	32.3492	25.1259	7	49759115	49773975	+	2024	protein_coding	HIV-1 Tat interactive protein 2 [Source:MGI Symbol;Acc:MGI:1859271]
ENSMUSG00000024414	Mrpl27	30.8563	27.8817	24.5202	26.5017	27.6966	25.4552	11	94653767	94660089	+	985	protein_coding	mitochondrial ribosomal protein L27 [Source:MGI Symbol;Acc:MGI:2137224]
ENSMUSG00000052459	Atp6v1a	18.4174	24.3238	21.6037	34.1655	36.3612	27.9712	16	44085402	44139705	-	6044	protein_coding	ATPase, H+ transporting, lysosomal V1 subunit A [Source:MGI Symbol;Acc:MGI:1201780]
ENSMUSG00000024644	Cndp2	23.3205	26.4395	23.6656	25.9492	35.0613	28.3433	18	84667470	84685633	-	2119	protein_coding	CNDP dipeptidase 2 (metallopeptidase M20 family) [Source:MGI Symbol;Acc:MGI:1913304]
ENSMUSG00000027706	Sec62	29.4301	29.6935	29.4688	26.8448	22.9823	24.244	3	30792875	30821263	+	4343	protein_coding	SEC62 homolog (S. cerevisiae) [Source:MGI Symbol;Acc:MGI:1916526]
ENSMUSG00000059278	Naa38	27.7619	31.0725	23.8363	26.8037	25.8591	27.2832	11	69395487	69396680	+	890	protein_coding	N(alpha)-acetyltransferase 38, NatC auxiliary subunit [Source:MGI Symbol;Acc:MGI:1925554]
ENSMUSG00000021109	Hif1a	8.49005	8.8137	8.34485	29.242	71.2984	36.3803	12	73901375	73947530	+	5896	protein_coding	hypoxia inducible factor 1, alpha subunit [Source:MGI Symbol;Acc:MGI:106918]
ENSMUSG00000006154	Eps8l1	34.3623	45.1354	46.5895	15.6334	9.70554	11.1371	7	4460674	4480487	+	6036	protein_coding	EPS8-like 1 [Source:MGI Symbol;Acc:MGI:1914675]
ENSMUSG00000031065	Cdk16	32.2803	27.0123	28.3118	23.5079	24.757	26.6473	X	20687954	20699880	+	4378	protein_coding	cyclin-dependent kinase 16 [Source:MGI Symbol;Acc:MGI:97516]
ENSMUSG00000032398	Snapc5	32.9657	33.4882	30.1307	22.0474	19.2761	24.5559	9	64179274	64183132	+	1228	protein_coding	small nuclear RNA activating complex, polypeptide 5 [Source:MGI Symbol;Acc:MGI:1914282]
ENSMUSG00000058799	Nap1l1	28.2986	30.1743	27.7513	23.5131	27.8643	24.7032	10	111473223	111498150	+	4994	protein_coding	nucleosome assembly protein 1-like 1 [Source:MGI Symbol;Acc:MGI:1855693]
ENSMUSG00000104960	Snhg8	24.0549	28.7247	21.8344	27.6562	30.4917	29.5408	3	123507552	123508404	-	853	processed_transcript	small nucleolar RNA host gene 8 [Source:MGI Symbol;Acc:MGI:1917145]
ENSMUSG00000075701	Selenos	24.9481	25.1586	22.9607	34.0937	27.6643	27.466	7	66079649	66089405	+	1477	protein_coding	selenoprotein S [Source:MGI Symbol;Acc:MGI:95994]
ENSMUSG00000019132	BC005537	23.76	25.739	25.3379	28.1275	31.324	27.978	13	24801657	24816197	+	5849	protein_coding	cDNA sequence BC005537 [Source:MGI Symbol;Acc:MGI:2441726]
ENSMUSG00000083773	Gm13394	56.8115	17.1467	27.1404	33.0271	11.4868	16.6184	2	28933610	28934609	-	1000	processed_pseudogene	predicted gene 13394 [Source:MGI Symbol;Acc:MGI:3651848]
ENSMUSG00000024769	Cdc42bpg	25.7508	30.1345	30.5537	21.9643	29.4347	24.0586	19	6306456	6325652	+	6099	protein_coding	CDC42 binding protein kinase gamma (DMPK-like) [Source:MGI Symbol;Acc:MGI:2652845]
ENSMUSG00000035027	Map2k2	27.439	29.3592	30.0921	22.2927	25.9272	26.7861	10	81105915	81133975	+	5663	protein_coding	mitogen-activated protein kinase kinase 2 [Source:MGI Symbol;Acc:MGI:1346867]
ENSMUSG00000024810	Il33	21.1812	29.1275	25.8485	32.926	22.2464	30.4366	19	29925114	29960718	+	2886	protein_coding	interleukin 33 [Source:MGI Symbol;Acc:MGI:1924375]
ENSMUSG00000003813	Rad23a	32.9274	27.5417	29.8948	22.6035	24.1497	24.4858	8	84834019	84840665	-	2577	protein_coding	RAD23 homolog A, nucleotide excision repair protein [Source:MGI Symbol;Acc:MGI:105126]
ENSMUSG00000020758	Itgb4	16.9162	18.8871	20.1609	25.9038	37.685	41.9945	11	115974709	116008412	+	7015	protein_coding	integrin beta 4 [Source:MGI Symbol;Acc:MGI:96613]
ENSMUSG00000040447	Spns2	24.7293	37.6789	30.333	23.9104	23.1898	21.33	11	72451638	72489904	-	4083	protein_coding	spinster homolog 2 [Source:MGI Symbol;Acc:MGI:2384936]
ENSMUSG00000005583	Mef2c	44.4612	28.7578	35.5769	18.5386	14.089	19.7	13	83504034	83667080	+	15715	protein_coding	myocyte enhancer factor 2C [Source:MGI Symbol;Acc:MGI:99458]
ENSMUSG00000002379	Ndufa11	31.6149	30.9622	29.2131	23.2323	21.0903	24.9337	17	56717762	56724248	+	2661	protein_coding	NADH dehydrogenase (ubiquinone) 1 alpha subcomplex 11 [Source:MGI Symbol;Acc:MGI:1917125]
ENSMUSG00000020393	Kremen1	30.148	28.1429	29.2009	24.4058	22.8178	26.3105	11	5191552	5261558	-	7722	protein_coding	kringle containing transmembrane protein 1 [Source:MGI Symbol;Acc:MGI:1933988]
ENSMUSG00000074183	Gsta1	3.39834	7.49411	4.01099	37.4068	70.6338	38.0776	9	78230656	78242684	+	956	protein_coding	glutathione S-transferase, alpha 1 (Ya) [Source:MGI Symbol;Acc:MGI:1095417]
ENSMUSG00000030663	1110004F10Rik	25.5798	24.591	25.9994	26.6163	31.8968	26.3115	7	116039397	116105210	+	2490	protein_coding	RIKEN cDNA 1110004F10 gene [Source:MGI Symbol;Acc:MGI:1929274]
ENSMUSG00000029070	Mxra8	29.0795	32.851	33.2789	21.443	18.8391	25.4497	4	155839680	155844088	+	2918	protein_coding	matrix-remodelling associated 8 [Source:MGI Symbol;Acc:MGI:1922011]
ENSMUSG00000032802	Srxn1	24.3752	23.4239	22.2859	27.3951	35.3216	28.0326	2	152105516	152111376	+	2820	protein_coding	sulfiredoxin 1 homolog (S. cerevisiae) [Source:MGI Symbol;Acc:MGI:104971]
ENSMUSG00000027067	Ssrp1	20.0983	22.3795	23.5735	27.4457	38.7848	28.4206	2	85037234	85047109	+	3737	protein_coding	structure specific recognition protein 1 [Source:MGI Symbol;Acc:MGI:107912]
ENSMUSG00000037129	Tmprss13	23.8701	31.7484	31.2605	24.9758	27.2568	21.5503	9	45319100	45347581	+	3245	protein_coding	transmembrane protease, serine 13 [Source:MGI Symbol;Acc:MGI:2682935]
ENSMUSG00000020180	Snrpd3	27.1115	25.5325	26.3751	24.9555	27.1628	29.5012	10	75517551	75537381	+	3442	protein_coding	small nuclear ribonucleoprotein D3 [Source:MGI Symbol;Acc:MGI:1914582]
ENSMUSG00000061130	Ppm1b	34.6383	27.8735	31.5563	22.7172	20.3264	23.3764	17	84956741	85023991	+	4971	protein_coding	protein phosphatase 1B, magnesium dependent, beta isoform [Source:MGI Symbol;Acc:MGI:101841]
ENSMUSG00000071074	Yipf3	24.1913	25.8056	28.4221	26.7386	27.8928	27.4213	17	46248080	46252537	+	2693	protein_coding	Yip1 domain family, member 3 [Source:MGI Symbol;Acc:MGI:106280]
ENSMUSG00000068798	Rap1a	32.6141	29.8813	27.354	23.8995	21.3855	25.3224	3	105727267	105801336	-	2607	protein_coding	RAS-related protein-1a [Source:MGI Symbol;Acc:MGI:97852]
ENSMUSG00000079197	Psme2	21.1557	30.0276	18.1805	27.1218	29.3263	34.5668	14	55587441	55591113	-	1764	protein_coding	proteasome (prosome, macropain) activator subunit 2 (PA28 beta) [Source:MGI Symbol;Acc:MGI:1096365]
ENSMUSG00000039041	Adrm1	24.6779	24.8832	26.5028	24.0311	32.7402	27.5207	2	180171485	180176286	+	4457	protein_coding	adhesion regulating molecule 1 [Source:MGI Symbol;Acc:MGI:1929289]
ENSMUSG00000024140	Epas1	29.0432	27.6283	28.2246	25.0333	22.9192	27.5053	17	86753907	86833410	+	5309	protein_coding	endothelial PAS domain protein 1 [Source:MGI Symbol;Acc:MGI:109169]
ENSMUSG00000079426	Arpc4	22.5801	23.4388	22.7431	28.0794	32.9467	30.4166	6	113378115	113390448	+	2321	protein_coding	actin related protein 2/3 complex, subunit 4 [Source:MGI Symbol;Acc:MGI:1915339]
ENSMUSG00000022610	Mapk12	34.4424	31.3781	31.1605	20.962	18.0255	24.1434	15	89130585	89140703	-	1889	protein_coding	mitogen-activated protein kinase 12 [Source:MGI Symbol;Acc:MGI:1353438]
ENSMUSG00000026853	Crat	42.811	29.4837	31.1474	17.7836	15.0072	23.6543	2	30400471	30415813	-	5388	protein_coding	carnitine acetyltransferase [Source:MGI Symbol;Acc:MGI:109501]
ENSMUSG00000027293	Ehd4	23.4487	26.8314	22.246	30.0202	27.0082	30.2683	2	120089175	120154606	-	4007	protein_coding	EH-domain containing 4 [Source:MGI Symbol;Acc:MGI:1919619]
ENSMUSG00000046756	Mrps7	26.8823	26.7857	27.7354	24.0479	27.5607	26.7349	11	115603925	115608036	+	2072	protein_coding	mitchondrial ribosomal protein S7 [Source:MGI Symbol;Acc:MGI:1354367]
ENSMUSG00000042737	Dpm3	24.1879	32.0149	25.6851	29.2686	24.1949	24.2468	3	89259358	89267079	+	919	protein_coding	dolichyl-phosphate mannosyltransferase polypeptide 3 [Source:MGI Symbol;Acc:MGI:1915813]
ENSMUSG00000018845	Unc45b	39.1416	31.4979	38.2386	18.4506	11.2947	20.839	11	82910550	82943403	+	4493	protein_coding	unc-45 myosin chaperone B [Source:MGI Symbol;Acc:MGI:2443377]
ENSMUSG00000027620	Rbm39	25.6387	25.9304	25.6594	29.6653	28.0543	24.4768	2	156147239	156180238	-	6946	protein_coding	RNA binding motif protein 39 [Source:MGI Symbol;Acc:MGI:2157953]
ENSMUSG00000035828	Pim3	19.5978	28.077	26.8037	29.2386	26.4054	29.2705	15	88862186	88865718	+	2419	protein_coding	proviral integration site 3 [Source:MGI Symbol;Acc:MGI:1355297]
ENSMUSG00000035011	Zbtb7a	24.7895	29.6691	28.0667	21.9179	28.8339	26.0619	10	81135220	81152995	+	6808	protein_coding	zinc finger and BTB domain containing 7a [Source:MGI Symbol;Acc:MGI:1335091]
ENSMUSG00000028932	Psmc2	26.6375	27.2752	26.0427	26.627	27.0233	25.7219	5	21785283	21803787	+	5031	protein_coding	proteasome (prosome, macropain) 26S subunit, ATPase 2 [Source:MGI Symbol;Acc:MGI:109555]
ENSMUSG00000000552	Zfp385a	22.1854	22.7867	24.7799	25.6755	35.312	28.5606	15	103313895	103340086	-	2291	protein_coding	zinc finger protein 385A [Source:MGI Symbol;Acc:MGI:1352495]
ENSMUSG00000004895	Prcc	28.9396	26.3274	27.521	22.8772	29.317	24.2281	3	87858903	87885608	-	2099	protein_coding	papillary renal cell carcinoma (translocation-associated) [Source:MGI Symbol;Acc:MGI:2137738]
ENSMUSG00000014402	Tsg101	25.1161	29.4273	27.2343	27.2968	26.1473	23.9526	7	46888949	46919969	-	2730	protein_coding	tumor susceptibility gene 101 [Source:MGI Symbol;Acc:MGI:106581]
ENSMUSG00000025509	Pnpla2	25.2097	27.3606	27.1255	24.9968	23.1475	31.1824	7	141455198	141460743	+	3020	protein_coding	patatin-like phospholipase domain containing 2 [Source:MGI Symbol;Acc:MGI:1914103]
ENSMUSG00000021877	Arf4	24.0966	26.1017	25.5145	28.6623	27.452	26.9344	14	26638074	26665084	+	3603	protein_coding	ADP-ribosylation factor 4 [Source:MGI Symbol;Acc:MGI:99433]
ENSMUSG00000046841	Ckap4	19.3741	24.0127	21.7961	26.5654	37.133	29.8657	10	84526305	84534062	-	3089	protein_coding	cytoskeleton-associated protein 4 [Source:MGI Symbol;Acc:MGI:2444926]
ENSMUSG00000078974	Sec61g	25.5548	26.3236	21.5445	31.0847	23.2759	30.646	11	16500530	16508484	-	2464	protein_coding	SEC61, gamma subunit [Source:MGI Symbol;Acc:MGI:1202066]
ENSMUSG00000022774	Ncbp2	29.4318	27.8494	31.1972	22.6692	23.0127	24.2312	16	31948513	31961781	+	2305	protein_coding	nuclear cap binding protein subunit 2 [Source:MGI Symbol;Acc:MGI:1915342]
ENSMUSG00000024767	Otub1	24.4056	28.4135	25.1636	25.8505	30.5627	23.9591	19	7198202	7206316	-	2545	protein_coding	OTU domain, ubiquitin aldehyde binding 1 [Source:MGI Symbol;Acc:MGI:2147616]
ENSMUSG00000023019	Gpd1	46.4722	34.6645	32.4424	17.5575	11.264	15.8527	15	99717515	99725005	+	2961	protein_coding	glycerol-3-phosphate dehydrogenase 1 (soluble) [Source:MGI Symbol;Acc:MGI:95679]
ENSMUSG00000021610	Clptm1l	23.1154	21.7951	24.6072	26.5317	31.8246	30.0972	13	73604006	73620605	+	3068	protein_coding	CLPTM1-like [Source:MGI Symbol;Acc:MGI:2442892]
ENSMUSG00000027750	Postn	29.9213	31.7301	24.8594	33.6818	18.155	19.6141	3	54361109	54391037	+	8702	protein_coding	periostin, osteoblast specific factor [Source:MGI Symbol;Acc:MGI:1926321]
ENSMUSG00000028879	Stx12	24.9942	30.3385	27.4924	27.9397	24.4498	22.5235	4	132853501	132884509	-	3188	protein_coding	syntaxin 12 [Source:MGI Symbol;Acc:MGI:1931027]
ENSMUSG00000022178	Ajuba	13.3502	22.9609	18.9784	28.6749	43.6827	30.0338	14	54567469	54577661	-	3503	protein_coding	ajuba LIM protein [Source:MGI Symbol;Acc:MGI:1341886]
[truncated: 50,637 more rows]
